# Supplementary material for: Transcriptional Regulation of the Postnatal Cardiac Conduction System Heterogeneity
Source: Research Square preprint supplement (doi:10.21203/rs.3.rs-2925397/v1), 2024-03-06
Supplement: Supplementary file 1 [file 59c7eabf057311798bcf8edd.xlsx]

## Sheet: E-SAN-t vs P-SAN
Gene	p_val	avg_log2FC	pct.1	pct.2	p_val_adj
Atp5o.1	1.01921e-14	-9.43519	0	1	3.30774e-10
Elob	1.01921e-14	-9.14648	0	1	3.30774e-10
Rack1	1.01921e-14	-8.40549	0	1	3.30774e-10
Sem1	1.01921e-14	-8.3487	0	1	3.30774e-10
Selenow	1.01921e-14	-8.17348	0	1	3.30774e-10
Rtraf	1.01921e-14	-7.70688	0	1	3.30774e-10
Gm45716	1.01921e-14	-7.38674	0	1	3.30774e-10
Fmc1	1.01921e-14	-7.36158	0	1	3.30774e-10
Gm31659	1.01921e-14	-7.29082	0	1	3.30774e-10
Jpt1	1.01921e-14	-7.22474	0	1	3.30774e-10
Selenok	1.01921e-14	-7.1869	0	1	3.30774e-10
Bex3	1.01921e-14	-7.04404	0	1	3.30774e-10
Selenof	1.00006e-13	-7.04319	0	0.941	3.24559e-09
Cops9	1.00006e-13	-7.0037	0	0.941	3.24559e-09
Cebpd	9.16633e-13	-6.97843	0	0.882	2.97484e-08
Gucy1a1	1.01921e-14	-6.90319	0	1	3.30774e-10
Ss18l2	1.00006e-13	-6.83071	0	0.941	3.24559e-09
Tceal9	1.00006e-13	-6.82771	0	0.941	3.24559e-09
Selenom	7.86682e-12	-6.82204	0	0.824	2.5531e-07
Gem	7.86682e-12	-6.71344	0	0.824	2.5531e-07
Rex1bd	9.16633e-13	-6.70285	0	0.882	2.97484e-08
Eloc	1.01921e-14	-6.69869	0	1	3.30774e-10
Gm34030	1.01921e-14	-6.60807	0	1	3.30774e-10
Cxcl1	1.48451e-07	-6.57066	0	0.529	0.00481784
Selenoh	9.16633e-13	-6.50115	0	0.882	2.97484e-08
Retreg1	6.33667e-11	-6.43486	0	0.765	2.0565e-06
Snu13	1.00006e-13	-6.39936	0	0.941	3.24559e-09
5430431A17Rik	7.86682e-12	-6.16363	0	0.824	2.5531e-07
Ndufaf8	6.33667e-11	-6.15706	0	0.765	2.0565e-06
Cabcoco1	7.86682e-12	-6.10566	0	0.824	2.5531e-07
Xist	1.96187e-08	-6.06685	0.022	0.647	0.000636706
Rspo3	2.31832e-08	-5.99096	0	0.588	0.000752386
Mcrip1	6.33667e-11	-5.94372	0	0.765	2.0565e-06
Mcrip2	7.86682e-12	-5.9343	0	0.824	2.5531e-07
Nipsnap2	7.86682e-12	-5.85008	0	0.824	2.5531e-07
Trir	3.43154e-09	-5.8218	0	0.647	0.000111367
Hpf1	1.00006e-13	-5.82016	0	0.941	3.24559e-09
Cenpx	7.86682e-12	-5.79474	0	0.824	2.5531e-07
Afdn	4.80186e-10	-5.78629	0	0.706	1.5584e-05
Myl3	3.31942e-10	-5.77295	0.087	0.882	1.07728e-05
Prelid3b	6.33667e-11	-5.73492	0	0.765	2.0565e-06
Klf4	3.38856e-09	-5.71176	0.022	0.706	0.000109972
Selenos	9.16633e-13	-5.69551	0	0.882	2.97484e-08
Vps28	4.80186e-10	-5.56204	0	0.706	1.5584e-05
Gm47283	3.43154e-09	-5.52682	0	0.647	0.000111367
Gnb5	1.48451e-07	-5.49087	0	0.529	0.00481784
Dmac1	4.80186e-10	-5.45907	0	0.706	1.5584e-05
Cavin1	4.80186e-10	-5.43171	0	0.706	1.5584e-05
Casp3	2.31832e-08	-5.43088	0	0.588	0.000752386
Naxe	4.80186e-10	-5.39957	0	0.706	1.5584e-05
Rasgef1b	1.48451e-07	-5.39416	0	0.529	0.00481784
Gm47547	2.31832e-08	-5.36028	0	0.588	0.000752386
Hdgfl3	4.80186e-10	-5.34168	0	0.706	1.5584e-05
Thap12	4.80186e-10	-5.2763	0	0.706	1.5584e-05
Map3k20	3.43154e-09	-5.27183	0	0.647	0.000111367
Mosmo	2.31832e-08	-5.26639	0	0.588	0.000752386
Mrpl58	2.31832e-08	-5.26405	0	0.588	0.000752386
Hba-a1	1.01651e-09	7.91623	1	0	3.29899e-05
Hbb-bs	2.43066e-09	7.42655	0.978	0.059	7.88846e-05
Atp5o	1.08311e-09	7.41415	1	0.059	3.51513e-05
H19	1.34226e-07	7.25273	0.848	0	0.00435618
Selenot	4.80186e-10	-5.25997	0	0.706	1.5584e-05
Sepw1	1.01651e-09	7.22773	1	0	3.29899e-05
Tceb2	1.01651e-09	7.2264	1	0	3.29899e-05
Nectin2	3.43154e-09	-5.17971	0	0.647	0.000111367
Gnb2l1	2.16272e-09	6.66632	0.978	0	7.0189e-05
Shfm1	9.23176e-09	6.5087	0.935	0	0.000299607
Timm8a1	4.80186e-10	-5.17729	0	0.706	1.5584e-05
Kcne1	1.0082e-09	-5.14736	0.087	0.824	3.27201e-05
Myeov2	2.16175e-09	6.44456	0.978	0	7.01573e-05
2700060E02Rik	4.51178e-09	6.35372	0.957	0	0.000146425
Igf2	1.34226e-07	6.27824	0.848	0	0.00435618
Gm10709	4.51178e-09	6.21951	0.957	0	0.000146425
Klf2	2.07816e-09	-5.12136	0.087	0.824	6.74447e-05
Wbp5	3.6517e-08	6.02419	0.891	0	0.00118512
Gm8730	9.23176e-09	6.00677	0.935	0	0.000299607
Ngfrap1	9.23176e-09	6.00231	0.935	0	0.000299607
Gucy1a3	4.51178e-09	5.95438	0.957	0	0.000146425
Rpl10	1.20191e-09	5.8414	1	0.176	3.90069e-05
Cop1	4.80186e-10	-5.12068	0	0.706	1.5584e-05
Mgll	2.31832e-08	-5.092	0	0.588	0.000752386
Mesd	2.31832e-08	-5.02513	0	0.588	0.000752386
Irf1	1.05823e-06	-5.00786	0.022	0.529	0.0343438
Hikeshi	3.43154e-09	-4.95583	0	0.647	0.000111367
Nbdy	1.48451e-07	-4.93342	0	0.529	0.00481784
Socs2	8.61834e-11	-4.91539	0.022	0.824	2.797e-06
E330017L17Rik	2.31832e-08	-4.88815	0	0.588	0.000752386
1110001J03Rik	7.06431e-08	5.76981	0.87	0	0.00229265
Rps12	1.20191e-09	5.58284	1	0.176	3.90069e-05
8430408G22Rik	1.48451e-07	-4.87322	0	0.529	0.00481784
Rtf2	2.31832e-08	-4.85658	0	0.588	0.000752386
Hn1	1.4729e-06	5.39121	0.761	0	0.0478015
Gbas	8.29767e-07	5.26498	0.783	0	0.0269293
Deb1	4.59844e-07	5.24021	0.804	0	0.0149238
Myl2	5.17141e-09	-4.84203	0.174	0.941	0.000167833
Nsmce3	4.80186e-10	-4.83615	0	0.706	1.5584e-05
Kmt5a	1.48451e-07	-4.78679	0	0.529	0.00481784
Mia2	2.31832e-08	-4.77932	0	0.588	0.000752386
Gm49083	1.48451e-07	-4.75474	0	0.529	0.00481784
Gadd45b	9.40986e-11	-4.65015	0.196	1	3.05388e-06
Naxd	1.48451e-07	-4.58882	0	0.529	0.00481784
Tdtomato	1.48451e-07	-4.54611	0	0.529	0.00481784
Sap30l	4.23361e-10	-4.51344	0.022	0.765	1.37397e-05
Mpp6	3.23437e-09	-4.29827	0.043	0.765	0.000104968
Selk	8.29767e-07	5.22851	0.783	0	0.0269293
Ptrf	2.50589e-07	5.19209	0.826	0	0.0081326
Tceb1	2.50589e-07	5.14909	0.826	0	0.0081326
Gsg1l	7.46097e-09	-4.27322	0.022	0.706	0.000242138
Pgk1	5.44063e-11	-4.15586	0.13	0.941	1.7657e-06
Rps27	1.3722e-09	4.93753	1	0.412	4.45334e-05
Smoc2	3.58669e-09	4.75863	0.978	0.294	0.000116402
Ier3	3.82902e-10	-4.09585	0.326	1	1.24267e-05
Arid5b	1.33422e-10	-4.09414	0.109	0.941	4.33006e-06
Mb	1.57316e-07	-3.99518	0.043	0.647	0.00510554
Cited4	8.49602e-09	-3.9415	0.022	0.706	0.00027573
Rhbdl3	1.99294e-07	-3.86624	0.043	0.647	0.00646789
Nfkbia	1.36119e-09	-3.72706	0.217	0.941	4.41761e-05
Fbln1	1.60948e-10	-3.68624	0.13	0.941	5.22341e-06
Nudt14	1.40398e-06	-3.63297	0.043	0.588	0.0455648
Pim3	7.52925e-07	-3.60966	0.065	0.647	0.0244354
Sgcg	7.24357e-10	-3.59602	0.174	0.941	2.35083e-05
Slc39a8	2.8318e-07	-3.59221	0.043	0.647	0.00919032
Pim1	2.35425e-08	-3.52682	0.087	0.824	0.000764047
Jun	8.80907e-09	-3.46722	0.522	1	0.000285889
Lmod2	2.07338e-08	-3.46237	0.413	1	0.000672896
Fhl2	5.84312e-09	-3.44899	0.435	1	0.000189632
Hopx	1.19245e-09	-3.38705	0.239	1	3.86999e-05
Tmem163	7.7362e-09	-3.31442	0.043	0.765	0.00025107
Rpl27	3.98413e-08	4.60558	0.913	0.176	0.00129301
Rpl13a	1.44159e-09	4.55361	1	0.588	4.67853e-05
Sept2	1.39608e-06	4.24994	0.783	0.059	0.0453084
Gapdh	1.47844e-09	3.67016	1	0.941	4.79814e-05
Rora	1.2532e-06	-3.31264	0.043	0.588	0.0406713
Csnk2a2	4.29821e-07	-3.29791	0.022	0.588	0.0139494
Atf3	2.53193e-07	-3.29578	0.413	0.941	0.00821714
Mmd	6.87884e-07	3.32197	0.891	0.353	0.0223246
Rpl36al	7.61074e-08	3.27719	0.935	0.471	0.00246999
Rrad	6.05243e-09	-3.20662	0.696	1	0.000196426
Rps18	1.42111e-08	2.82937	1	0.412	0.000461207
Rpl9	1.47844e-09	2.80235	1	1	4.79814e-05
Rps2	3.03451e-08	2.78398	0.978	0.647	0.000984821
Gpr22	1.29318e-06	-3.15506	0.065	0.647	0.041969
Acads	9.10866e-07	-3.10466	0.087	0.706	0.0295613
Klf6	8.40879e-08	-3.0509	0.174	0.882	0.00272899
Clu	3.7763e-07	-2.97645	0.196	0.824	0.0122556
Snap91	2.65082e-07	2.53094	0.978	0.412	0.00860298
Lbh	3.46188e-09	2.50546	1	0.765	0.000112352
Tspo	2.03279e-08	-2.92769	0.217	0.941	0.000659722
Fgl2	2.14208e-07	-2.83036	0.152	0.824	0.0069519
Cpne5	3.81352e-09	-2.82294	0.37	1	0.000123764
Ucp2	4.5722e-08	-2.74856	0.087	0.824	0.00148386
Smad7	2.27022e-07	-2.69197	0.152	0.882	0.00736776
Lsm12	1.37634e-07	-2.65807	0.174	0.882	0.00446677
Slc22a1	1.48584e-07	-2.63532	0.348	1	0.00482214
Cdc42ep3	1.67043e-07	-2.61011	0.13	0.882	0.00542123
Art3	1.18459e-07	-2.58474	0.283	0.941	0.00384447
Sox4	4.17809e-08	-2.49706	0.543	1	0.00135596
Fabp3	1.58364e-08	-2.47302	0.804	1	0.000513954
Myl12b	6.59719e-07	-2.45189	0.196	0.882	0.0214105
Perp	1.8268e-08	-2.43485	0.5	1	0.00059287
Pnrc1	2.91479e-08	-2.41319	0.522	1	0.000945965
Dnajc3	4.89991e-07	-2.40189	0.152	0.882	0.0159022
Cycs	2.62001e-09	2.39786	1	1	8.50298e-05
Gpx3	1.79079e-09	2.32917	1	0.941	5.81182e-05
Cst3	5.2727e-09	-2.39403	0.804	1	0.00017112
mt-Nd4l	2.87481e-09	-2.38669	0.935	1	9.3299e-05
Synpo2l	1.69937e-07	2.28382	0.957	0.706	0.00551512
Ubb	1.47778e-09	-2.33155	0.957	1	4.79598e-05
Tcap	8.66877e-09	-2.24449	0.87	1	0.000281336
C130080G10Rik	5.45451e-07	-2.22052	0.261	0.941	0.0177021
Rpl15	1.47778e-09	-2.08674	1	1	4.79598e-05
Cav1	2.95985e-07	2.14962	0.978	0.824	0.00960591
Rps29	1.47844e-09	2.12849	1	1	4.79814e-05
Grb14	8.31725e-07	-2.06322	0.283	1	0.0269928
Atp5k	2.62001e-09	2.09163	1	1	8.50298e-05
Igfbp5	2.04664e-07	2.07811	1	1	0.00664217
Nebl	9.95617e-09	-2.00495	0.63	1	0.000323117
Vsnl1	4.80041e-08	2.00583	1	0.824	0.00155792
Ldb3	6.236e-08	1.93332	1	0.882	0.00202383
Gadd45g	1.44396e-06	-1.9971	0.696	1	0.0468624
Ctsl	3.44243e-07	-1.73975	0.652	1	0.0111721
Rpl7a	1.26627e-08	1.74148	1	1	0.000410956
Gm42418	9.6795e-08	-1.65185	0.696	1	0.00314139
mt-Nd3	8.14694e-07	1.6236	1	0.941	0.0264401
Zyx	1.28434e-06	1.57324	0.935	0.765	0.0416819
Idh2	7.44511e-07	-1.64879	0.87	1	0.0241624
Rtn4	1.56257e-07	-1.61371	0.848	1	0.00507116
Map1lc3a	4.0363e-08	-1.55617	1	1	0.00130994
Rpl21	3.95368e-07	1.56114	1	1	0.0128313
H3f3b	6.77656e-08	-1.50951	0.913	1	0.00219926
Rpl30	1.15589e-08	-1.45199	0.957	1	0.000375132
Rplp1	3.69712e-08	1.48358	1	1	0.00119986
Ndufa3	4.65032e-07	1.37467	1	1	0.0150921
mt-Nd1	8.07789e-08	1.25576	1	1	0.0026216
Dbi	1.52451e-06	-1.42519	0.957	1	0.0494764
Sln	1.88297e-07	1.17677	1	1	0.00611098
Cavin3	9.03511e-07	-4.92574	0	0.471	0.0293226
Gucy1b1	9.03511e-07	-4.74224	0	0.471	0.0293226
Gm20594	9.03511e-07	-4.56657	0	0.471	0.0293226
Lrrc10	9.03511e-07	-4.44717	0	0.471	0.0293226
Nectin3	9.03511e-07	-4.4163	0	0.471	0.0293226
St8sia2	9.03511e-07	-4.35954	0	0.471	0.0293226
Maip1	9.03511e-07	-4.16405	0	0.471	0.0293226
Tpm1	3.81888e-09	-1.26982	1	1	0.000123938
Acadl	1.52319e-06	-1.22648	0.935	1	0.0494336
Atp2a2	1.11668e-06	1.03302	1	1	0.0362408
Rps10	8.02286e-09	-1.1982	1	1	0.000260374
Rpl38	2.62442e-07	1.01199	1	1	0.00851729
Crip2	2.22328e-07	-1.178	0.957	1	0.00721545
Rplp2	8.81819e-07	0.995263	1	1	0.0286186
Rplp0	8.07789e-08	-1.14599	1	1	0.0026216
Rpl26	2.04664e-07	-1.10775	1	1	0.00664217
Rpl37a	3.09402e-07	0.811113	1	1	0.0100413
Rps24	1.46433e-07	-0.931748	1	1	0.00475235
Rps20	1.52495e-06	-0.923236	1	1	0.0494907
Rpl19	1.88297e-07	-0.800207	1	1	0.00611098
Fkbp3	1.63938e-06	-1.40392	0.739	1	0.0532043
Adra1b	1.72593e-06	-4.03153	0.022	0.529	0.0560133
Ppp1r15a	1.79263e-06	-2.5975	0.174	0.824	0.0581781
Nrk	1.81083e-06	4.16382	0.804	0.059	0.0587688
Eno3	2.05443e-06	-1.21791	0.87	1	0.0666746
Cox6a1	2.07479e-06	1.23861	1	1	0.0673351
Tmsb4x	2.2395e-06	1.29495	1	1	0.0726809
Ppp1r14c	2.41607e-06	-1.01073	0.957	1	0.0784111
Rpl31	2.41674e-06	1.08264	1	1	0.0784328
Actc1	2.41674e-06	0.98232	1	1	0.0784328
Eif3c	2.43912e-06	-1.77115	0.435	1	0.0791591
Caml	2.45955e-06	-3.16901	0.043	0.588	0.0798224
RP23-455C13.7	2.57299e-06	5.08162	0.739	0	0.0835038
Fam195b	2.57299e-06	4.83133	0.739	0	0.0835038
Hint1	2.81245e-06	-0.917299	1	1	0.0912752
Fau	2.81245e-06	-0.675257	1	1	0.0912752
Ubn1	2.85034e-06	-2.56693	0.13	0.765	0.092505
Ccng1	2.98691e-06	2.13116	0.935	0.765	0.096937
Hspa5	3.02466e-06	-1.40344	0.913	1	0.0981624
Aldh1b1	3.05559e-06	-2.29859	0.196	0.824	0.099166
Mhrt	3.06731e-06	-3.12002	0.043	0.588	0.0995465
Pgp	3.17759e-06	-2.44852	0.152	0.765	0.103126
Ech1	3.49111e-06	-1.872	0.609	0.941	0.1133
Ube2m	3.63324e-06	-2.06753	0.391	0.882	0.117913
Kif3a	3.81772e-06	-2.96642	0.043	0.588	0.1239
Vdac3	4.07058e-06	-1.15683	0.891	1	0.132107
Dnaja1	4.20747e-06	-1.46812	0.696	1	0.136549
Ppp1r14b	4.37515e-06	-1.85429	0.457	0.941	0.141991
H2afz	4.40334e-06	-1.21873	0.935	1	0.142906
Rpl18	4.408e-06	-0.857253	1	1	0.143057
1810043H04Rik	4.42514e-06	4.60557	0.717	0	0.143613
Prkra	4.51774e-06	-2.32174	0.087	0.706	0.146619
Rbm3	4.54513e-06	-1.28212	0.783	1	0.147508
Dcpp1	5.24287e-06	-7.88568	0	0.412	0.170152
Utp11	5.24287e-06	-4.78718	0	0.412	0.170152
Nop53	5.24287e-06	-4.72778	0	0.412	0.170152
Erbin	5.24287e-06	-4.71737	0	0.412	0.170152
Slc6a6	5.24287e-06	-4.69657	0	0.412	0.170152
Smim26	5.24287e-06	-4.66714	0	0.412	0.170152
Ufd1	5.24287e-06	-4.60779	0	0.412	0.170152
2900097C17Rik	5.24287e-06	-4.49409	0	0.412	0.170152
Rtl8b	5.24287e-06	-4.43001	0	0.412	0.170152
Gm17018	5.24287e-06	-4.41289	0	0.412	0.170152
Selenop	5.24287e-06	-4.4112	0	0.412	0.170152
Rtl8a	5.24287e-06	-4.34056	0	0.412	0.170152
Gm17056	5.24287e-06	-4.28466	0	0.412	0.170152
Cmss1	5.24287e-06	-4.2791	0	0.412	0.170152
Kmt5b	5.24287e-06	-4.19077	0	0.412	0.170152
Mettl26	5.24287e-06	-4.17909	0	0.412	0.170152
Eef1akmt1	5.24287e-06	-4.03803	0	0.412	0.170152
Washc2	5.24287e-06	-3.95283	0	0.412	0.170152
Rpl5	5.50132e-06	-0.910962	0.978	1	0.17854
Cmc1	5.54801e-06	-1.71175	0.304	0.941	0.180055
Nfix	5.54847e-06	-2.51766	0.065	0.647	0.18007
Isoc1	5.60144e-06	-2.34452	0.261	0.882	0.181789
Pbx1	5.67332e-06	1.79176	0.913	0.647	0.184122
Pmepa1	5.70879e-06	-2.32013	0.326	0.824	0.185273
Wdr89	5.86572e-06	3.97537	0.739	0.059	0.190366
Me1	5.88922e-06	-2.0493	0.217	0.882	0.191129
Jund	5.93234e-06	-1.8198	0.674	1	0.192528
Hsp90ab1	6.36965e-06	-0.814697	1	1	0.206721
Gja3	6.67392e-06	-3.84014	0.022	0.471	0.216595
Clip4	6.68003e-06	-2.14945	0.152	0.824	0.216794
Rpl36a	6.85157e-06	0.976961	1	1	0.222361
Pdia6	7.4958e-06	-2.19105	0.348	0.941	0.243269
Tenm4	7.83564e-06	3.1371	0.783	0.118	0.254298
Cox6a2	7.92208e-06	-0.722141	1	1	0.257103
Rel	7.95015e-06	-3.19759	0.065	0.588	0.258014
Dpysl3	8.47148e-06	-1.61117	0.522	0.941	0.274933
Snx24	8.69955e-06	-2.62468	0.087	0.647	0.282335
Btbd7	8.80444e-06	-2.91474	0.065	0.588	0.285739
Timm17a	8.9204e-06	-1.51395	0.609	1	0.289503
Hist1h2bc	9.08639e-06	-2.8395	0.13	0.706	0.29489
Gm8797	9.1207e-06	3.08307	0.783	0.235	0.296003
Ifrd1	9.57191e-06	-2.28857	0.348	0.882	0.310647
Hagh	9.84372e-06	-2.45515	0.174	0.765	0.319468
Rnaseh2c	1.00663e-05	-2.3446	0.196	0.824	0.326691
Ufc1	1.02411e-05	-1.56152	0.435	0.941	0.332366
Tuba1b	1.03472e-05	2.1208	0.913	0.765	0.335807
Rpl35	1.05618e-05	1.27522	1	1	0.342771
Smpdl3a	1.06374e-05	-1.87448	0.087	0.706	0.345225
Lmntd1	1.07233e-05	-3.71368	0.022	0.471	0.348014
Cntn2	1.07233e-05	-3.68653	0.022	0.471	0.348014
Stmn1	1.09953e-05	-2.30188	0.348	0.941	0.356842
Junb	1.12144e-05	-2.66422	0.348	0.824	0.363952
Brd1	1.19448e-05	-2.25583	0.109	0.706	0.387655
Hspb3	1.1988e-05	-1.59705	0.239	0.941	0.389059
Dyrk2	1.20542e-05	-3.21605	0.022	0.471	0.391208
Rpl13	1.21783e-05	-0.729046	1	1	0.395233
S100a13	1.24195e-05	-2.16487	0.217	0.824	0.403063
Zak	1.25109e-05	4.95928	0.674	0	0.40603
Sep15	1.25109e-05	4.71193	0.674	0	0.40603
Fam195a	1.25109e-05	4.66737	0.674	0	0.40603
Tagln	1.25252e-05	-2.73682	0.326	0.824	0.406493
Fosb	1.26144e-05	-2.5392	0.152	0.706	0.409388
Homer2	1.26144e-05	-2.3652	0.152	0.706	0.409388
Tiparp	1.27801e-05	-2.40595	0.239	0.824	0.414766
Ftl1	1.30725e-05	1.25308	1	1	0.424256
Nkx2-5	1.33022e-05	-1.85011	0.217	0.882	0.431711
Insr	1.40033e-05	3.48108	0.739	0.176	0.454462
S100a1	1.47035e-05	-1.73452	0.5	0.941	0.477189
Bmp4	1.5011e-05	3.88816	0.717	0.118	0.487168
Trappc3	1.55543e-05	-2.02212	0.174	0.824	0.5048
Nppa	1.6166e-05	3.18946	0.783	0.294	0.524651
Pdia3	1.64264e-05	-1.44154	0.63	0.941	0.533101
Ankrd11	1.77126e-05	-1.92955	0.304	0.941	0.574846
Ppp1r3c	1.88339e-05	3.39212	0.761	0.294	0.611235
Cebpb	1.94406e-05	-2.54967	0.043	0.529	0.630925
Klf9	1.98754e-05	-3.15185	0.087	0.588	0.645035
Spag7	2.05835e-05	4.42983	0.652	0	0.668018
2810428I15Rik	2.05835e-05	4.3452	0.652	0	0.668018
Kcnj5	2.07531e-05	1.73236	0.913	0.706	0.673521
Phactr2	2.15765e-05	-2.27031	0.196	0.765	0.700245
Shb	2.21718e-05	-2.66856	0.109	0.647	0.719565
mt-Co3	2.2854e-05	0.751886	1	1	0.741704
Eif5a	2.32953e-05	-1.13221	0.761	1	0.756026
Btf3l4	2.49729e-05	3.3666	0.717	0.118	0.810471
Dek	2.51679e-05	-1.53275	0.391	0.941	0.816797
Rps3a1	2.6219e-05	-0.609857	1	1	0.850911
Exoc3	2.66511e-05	-2.08406	0.196	0.824	0.864935
Cpq	2.72784e-05	-2.45661	0.152	0.706	0.885294
Sertad1	2.72784e-05	-2.4269	0.152	0.706	0.885294
Lmna	2.7398e-05	-1.92181	0.348	0.882	0.889173
Sde2	2.76841e-05	-3.1647	0.065	0.529	0.89846
Slc8a1	2.78608e-05	-2.14409	0.152	0.765	0.904195
Hspa2	2.89095e-05	-2.45722	0.065	0.588	0.938229
Calca	2.91121e-05	-5.16124	0	0.353	0.944803
Washc3	2.91121e-05	-4.52712	0	0.353	0.944803
Coq8a	2.91121e-05	-4.47572	0	0.353	0.944803
Gm10602	2.91121e-05	-4.37441	0	0.353	0.944803
Scn5a	2.91121e-05	-4.34273	0	0.353	0.944803
Nsd2	2.91121e-05	-4.25707	0	0.353	0.944803
Selenon	2.91121e-05	-4.18289	0	0.353	0.944803
Utp4	2.91121e-05	-4.17444	0	0.353	0.944803
Ccrl2	2.91121e-05	-4.12283	0	0.353	0.944803
Nsd3	2.91121e-05	-4.09988	0	0.353	0.944803
Nup98	2.91121e-05	-4.06008	0	0.353	0.944803
Dnttip2	2.91121e-05	-4.04526	0	0.353	0.944803
Bmt2	2.91121e-05	-4.02274	0	0.353	0.944803
Dcaf1	2.91121e-05	-4.00973	0	0.353	0.944803
Mindy2	2.91121e-05	-3.97339	0	0.353	0.944803
Gm13594	2.91121e-05	-3.96635	0	0.353	0.944803
Kbtbd12	2.91121e-05	-3.91243	0	0.353	0.944803
Etfrf1	2.91121e-05	-3.90228	0	0.353	0.944803
Ppp4r3b	2.91121e-05	-3.88984	0	0.353	0.944803
Babam2	2.91121e-05	-3.80381	0	0.353	0.944803
Abraxas2	2.91121e-05	-3.74871	0	0.353	0.944803
Ldhb	2.99792e-05	-1.0611	0.913	1	0.972944
Socs3	3.03191e-05	-2.09699	0.239	0.824	0.983976
Park7	3.102e-05	-0.989959	0.783	1	1
1110012L19Rik	3.18394e-05	-2.29189	0.087	0.588	1
Selt	3.33954e-05	4.64736	0.63	0	1
Rpl8	3.44134e-05	-0.712315	1	1	1
Dtnbp1	3.47883e-05	-2.16063	0.217	0.824	1
Sfrp5	3.5441e-05	-4.09388	0.022	0.412	1
Zfp36l1	3.55865e-05	1.08677	0.978	0.941	1
Mrpl18	3.61525e-05	-1.11972	0.826	1	1
Hat1	3.86696e-05	-1.9966	0.152	0.765	1
Actn2	3.89435e-05	-1.09607	0.717	1	1
Klf10	3.98088e-05	-3.88605	0.022	0.412	1
Ccdc85b	4.04121e-05	-3.051	0.109	0.588	1
Herpud1	4.23014e-05	-1.84994	0.261	0.882	1
Celf2	4.32412e-05	2.19539	0.826	0.471	1
Bloc1s1	4.41951e-05	-2.62716	0.109	0.588	1
Ndufaf6	4.46843e-05	-3.48581	0.022	0.412	1
Pmp22	4.50672e-05	-2.2109	0.109	0.647	1
Manf	4.52599e-05	-1.92742	0.457	0.941	1
Atg101	4.52803e-05	-2.65537	0.065	0.529	1
Atp6v0b	4.78707e-05	-1.35516	0.609	1	1
Rpl4	4.8098e-05	0.958971	1	1	1
Atp5c1	4.8098e-05	-0.601946	1	1	1
Mid1ip1	4.87647e-05	-3.98102	0.087	0.529	1
Csrnp1	4.98895e-05	-2.96893	0.065	0.529	1
Ints6	5.01226e-05	-3.17639	0.022	0.412	1
Nudt4	5.02846e-05	-1.5587	0.478	1	1
Fuca1	5.05921e-05	-3.04105	0.043	0.471	1
Snrpd3	5.15092e-05	-1.97676	0.261	0.824	1
2700094K13Rik	5.34524e-05	4.34569	0.609	0	1
Luzp1	5.34524e-05	-1.74352	0.283	0.882	1
Stard10	5.48353e-05	-1.92668	0.435	0.824	1
Rps13	5.49024e-05	-0.655711	0.978	1	1
2900055J20Rik	5.61844e-05	-3.50922	0.022	0.412	1
Xirp2	5.61844e-05	-3.50735	0.022	0.412	1
Gm26735	5.61844e-05	-3.40453	0.022	0.412	1
Ptov1	5.66834e-05	-0.994921	0.783	1	1
Mical2	5.81131e-05	2.03872	0.87	0.588	1
Vps37b	6.21784e-05	-2.18551	0.152	0.706	1
Myl4	6.26121e-05	-0.685764	1	1	1
2010107E04Rik	6.26121e-05	0.577389	1	1	1
Sfr1	6.39263e-05	-1.30113	0.761	1	1
Psmc6	6.53543e-05	-1.6268	0.435	0.941	1
Cacybp	6.53702e-05	-1.36474	0.5	1	1
Rhobtb3	6.61655e-05	-2.36043	0.087	0.588	1
Gnao1	6.63705e-05	1.36241	0.957	0.765	1
Tecr	6.67879e-05	-1.19053	0.609	1	1
Ddx18	7.04514e-05	-2.95272	0.022	0.412	1
Nfkbiz	7.04514e-05	-2.91516	0.022	0.412	1
Pth1r	7.04514e-05	-2.73776	0.022	0.412	1
Ddit4l	7.04514e-05	-2.7355	0.022	0.412	1
Tgif2	7.04514e-05	-2.6086	0.022	0.412	1
Pam16	7.06727e-05	3.71472	0.63	0.059	1
Olfm1	7.31636e-05	-2.48688	0.065	0.529	1
Hs6st2	7.37775e-05	2.70672	0.696	0.176	1
Lgals1	7.42714e-05	1.62174	0.891	0.588	1
Ptma	8.12083e-05	-0.953611	0.978	1	1
Vgll4	8.17375e-05	-2.63397	0.109	0.588	1
Eif3d	8.19418e-05	-2.09145	0.196	0.765	1
Cnih4	8.33418e-05	-1.86971	0.37	0.941	1
Rab2a	8.38513e-05	-1.14927	0.783	1	1
Col1a2	8.44381e-05	4.57026	0.587	0	1
Sepp1	8.44381e-05	4.43483	0.587	0	1
Srp54b	8.44381e-05	4.28267	0.587	0	1
Stra13	8.44381e-05	4.17384	0.587	0	1
Mkks	8.44381e-05	4.17348	0.587	0	1
Ntf3	8.45346e-05	-2.87574	0.043	0.471	1
Dnajc1	8.45346e-05	-2.60897	0.043	0.471	1
Echdc2	8.45346e-05	-2.5795	0.043	0.471	1
Leo1	8.45346e-05	-2.29303	0.043	0.471	1
Cirbp	8.82588e-05	-1.15134	0.696	0.941	1
Bik	8.90963e-05	-2.29201	0.109	0.588	1
4930453N24Rik	9.11578e-05	-2.17636	0.13	0.647	1
Tnni1	9.23585e-05	0.898869	1	1	1
Atp1a1	9.23585e-05	0.727158	1	1	1
Iigp1	9.35167e-05	-1.78848	0.043	0.471	1
Ndfip1	9.43984e-05	-2.03607	0.087	0.588	1
Rps27rt	9.55255e-05	3.11574	0.652	0.118	1
Ier5	9.55255e-05	-2.087	0.37	0.882	1
Tesk1	9.70042e-05	-2.01302	0.065	0.529	1
Bcl2l11	9.70042e-05	-1.85299	0.065	0.529	1
Ezr	9.78734e-05	-1.63031	0.435	0.941	1
Cct2	9.78734e-05	-1.36857	0.435	0.941	1
Malat1	9.84614e-05	-1.26269	1	1	1
Ptp4a3	0.000101634	1.0811	0.978	0.941	1
Rpl41	0.000104944	0.653393	1	1	1
Ndufc1	0.000104944	0.615331	1	1	1
Dcaf13	0.000106463	-2.35634	0.065	0.529	1
Nme7	0.000106463	-2.0885	0.065	0.529	1
Nedd9	0.000106463	-1.89148	0.065	0.529	1
Sorbs2	0.00010661	1.69703	0.935	0.706	1
Rrbp1	0.000108385	-1.58725	0.413	0.882	1
Apobec2	0.000111172	-1.31194	0.717	1	1
Hspb7	0.000111827	1.31237	0.978	1	1
Clpp	0.000115447	-1.60039	0.239	0.824	1
Swi5	0.000115793	-1.31738	0.652	0.941	1
Rpl39	0.000119135	0.718398	1	1	1
Cox17	0.000123736	2.17057	0.804	0.471	1
Dbh	0.000123923	-1.84803	0.239	0.765	1
Gltscr2	0.000131697	4.17485	0.565	0	1
Gucy1b3	0.000131697	4.11158	0.565	0	1
Tmem261	0.000131697	4.09472	0.565	0	1
Rpl23a-ps3	0.000131697	4.09091	0.565	0	1
Slmo2	0.000131697	3.97809	0.565	0	1
Ate1	0.000133112	-2.47666	0.087	0.529	1
Rpl11	0.000135123	0.650594	1	1	1
Arpc3	0.000136103	-1.3346	0.435	0.941	1
Twistnb	0.000136772	-1.9744	0.13	0.647	1
Osbpl1a	0.000138237	-1.79076	0.196	0.765	1
Hspa1a	0.000141338	3.91773	0.674	0.176	1
Dut	0.000143084	-1.94141	0.239	0.765	1
Cox5a	0.000143854	-0.683307	1	1	1
Uqcrq	0.000143854	0.575462	1	1	1
Rab12	0.000145973	-1.27052	0.435	1	1
Agpat3	0.000146775	-1.81582	0.217	0.765	1
Eif1	0.000153116	-0.608381	1	1	1
Pink1	0.000153809	-1.79532	0.283	0.882	1
Dsg2	0.000155396	-4.64484	0	0.294	1
Lingo1	0.000155396	-4.48511	0	0.294	1
Sbk2	0.000155396	-4.36787	0	0.294	1
Gm13889	0.000155396	-4.34289	0	0.294	1
Sgk1	0.000155396	-4.24434	0	0.294	1
Gdf15	0.000155396	-4.20789	0	0.294	1
Zc3hav1	0.000155396	-4.11747	0	0.294	1
Bclaf3	0.000155396	-4.07065	0	0.294	1
Paxx	0.000155396	-4.04201	0	0.294	1
Cenps	0.000155396	-4.00288	0	0.294	1
Ppp4r3a	0.000155396	-3.99202	0	0.294	1
Ddx41	0.000155396	-3.98797	0	0.294	1
Npb	0.000155396	-3.95084	0	0.294	1
Map3k8	0.000155396	-3.92135	0	0.294	1
Mrm2	0.000155396	-3.86844	0	0.294	1
Kif13b	0.000155396	-3.85667	0	0.294	1
Eloa	0.000155396	-3.8038	0	0.294	1
Skap2	0.000155396	-3.78072	0	0.294	1
Styx	0.000155396	-3.72306	0	0.294	1
Fam181b	0.000155396	-3.6581	0	0.294	1
Agt	0.000155396	-3.63785	0	0.294	1
Fas	0.000155396	-3.62502	0	0.294	1
Arl13b	0.000155396	-3.62365	0	0.294	1
Ncoa4	0.000155396	-3.58459	0	0.294	1
Spats1	0.000155396	-3.55475	0	0.294	1
Zfp445	0.000155396	-3.5067	0	0.294	1
Gnmt	0.000155396	-3.49781	0	0.294	1
Dnaja2	0.000160562	-1.20426	0.522	1	1
Yy1	0.000162907	-1.69822	0.326	0.941	1
Rps6	0.000162936	0.874528	1	1	1
Prkaa2	0.000165386	2.50481	0.696	0.235	1
Mtch1	0.000169849	-1.17216	0.696	1	1
Eif1b	0.000171062	-1.44944	0.522	1	1
Lars	0.000172152	-1.89956	0.196	0.765	1
Igf2r	0.000172724	1.41605	0.935	0.882	1
Bri3	0.000173222	-0.885887	0.935	1	1
Pdlim4	0.000173691	-1.67391	0.13	0.647	1
Usp3	0.000174974	-2.23691	0.109	0.588	1
Arhgap10	0.000179049	-1.86592	0.196	0.706	1
Rock2	0.000179959	-1.55012	0.348	0.882	1
Adrb1	0.000180659	-2.87901	0.065	0.471	1
Hsd17b10	0.000183568	-1.42523	0.413	0.882	1
Sptbn1	0.000184381	0.808749	1	0.941	1
Mtdh	0.000193215	-1.43475	0.5	0.941	1
Hspb1	0.000195934	-0.859052	0.935	1	1
Pvalb	0.000201087	-4.11875	0.022	0.353	1
Selm	0.000202887	4.26623	0.543	0	1
Lyrm5	0.000202887	4.11908	0.543	0	1
Gm561	0.000202887	3.93317	0.543	0	1
Eif1a	0.000202894	-2.31545	0.13	0.588	1
Osgepl1	0.000203308	-1.93071	0.13	0.647	1
Bmp7	0.000204605	2.96381	0.652	0.176	1
Ndufa2	0.000208459	0.650277	1	1	1
Mafg	0.000223855	-1.98784	0.109	0.588	1
C2cd4b	0.0002249	-3.9087	0.022	0.353	1
Ctnnbl1	0.000224908	-2.62239	0.087	0.529	1
Hnrnpa1	0.000228027	1.0514	0.935	0.941	1
Syf2	0.00023071	-1.47997	0.283	0.882	1
Kxd1	0.00023071	-1.35943	0.283	0.882	1
Fam133b	0.000232867	-1.81626	0.152	0.647	1
Prdx2	0.000235304	-0.919517	0.935	1	1
Bok	0.000236126	-3.22046	0.043	0.412	1
Dhrs7	0.000237456	-1.35964	0.413	0.882	1
Mettl22	0.000242816	-2.00948	0.109	0.588	1
Gm10076	0.000243163	2.40775	0.696	0.294	1
Fos	0.000246244	-2.08436	0.609	0.941	1
Atxn7l3b	0.000246244	-1.31419	0.609	0.941	1
Rras	0.000251284	-1.50439	0.217	0.824	1
Dhrs11	0.000251342	-3.24931	0.022	0.353	1
Fam69a	0.000251342	-3.12408	0.022	0.353	1
Lmbrd2	0.000251342	-2.95728	0.022	0.353	1
Cited1	0.00025304	2.43701	0.739	0.353	1
Exosc8	0.000261205	-2.51476	0.065	0.471	1
Hnrnpa3	0.000263208	1.16197	0.935	0.765	1
Cd81	0.000264829	-0.768198	0.891	1	1
Rps15a	0.000265733	-0.51622	1	1	1
Minpp1	0.000266903	-2.2107	0.087	0.529	1
Ahi1	0.000280678	-3.05833	0.022	0.353	1
Crim1	0.000280678	-3.03324	0.022	0.353	1
mt-Atp6	0.000282198	0.640155	1	1	1
Serf2	0.000282198	0.61925	1	1	1
Tgm2	0.000283541	1.75327	0.826	0.529	1
Cdkn1a	0.000284105	-2.09739	0.217	0.706	1
Gjc1	0.000284154	-1.65162	0.348	0.882	1
Gclm	0.000285816	-1.6031	0.174	0.706	1
Slit3	0.000286055	-2.7066	0.065	0.471	1
Nr2f1	0.000286127	2.06627	0.783	0.412	1
Dctn3	0.0002903	-1.23098	0.543	0.941	1
Emc7	0.000290849	-1.20523	0.391	1	1
Grpel1	0.000292826	-1.5368	0.435	0.941	1
Gng2	0.000299217	1.63257	0.87	0.588	1
Epc2	0.000307286	-1.55073	0.174	0.706	1
Nhp2l1	0.00030885	3.86364	0.522	0	1
Psmd8	0.000311589	-1.0674	0.565	0.941	1
Zrsr1	0.000313106	-2.33705	0.065	0.471	1
Tppp3	0.000313199	-3.3851	0.022	0.353	1
Hoxb3os	0.000313199	-3.15534	0.022	0.353	1
Hsd17b7	0.000313199	-3.12491	0.022	0.353	1
Hist1h4h	0.000313199	-2.97417	0.022	0.353	1
Ddx23	0.000313199	-2.88933	0.022	0.353	1
Scd4	0.000313199	-2.69618	0.022	0.353	1
Ssr4	0.000314164	-1.10559	0.587	1	1
Arl1	0.000323565	-1.36196	0.522	0.941	1
Cyp51	0.000325763	-2.02418	0.13	0.588	1
Celf1	0.00032638	1.69364	0.826	0.588	1
Esd	0.000333696	-1.47082	0.609	0.941	1
Scd2	0.000342225	1.50857	0.848	0.588	1
Trim54	0.000349222	-2.38415	0.022	0.353	1
Txnrd3	0.000350127	-2.58481	0.043	0.412	1
Spock2	0.000350127	-2.56873	0.043	0.412	1
Psmb4	0.000352567	-0.990755	0.696	1	1
Phlda1	0.000353853	-1.38254	0.239	0.765	1
Slc48a1	0.000354627	-1.20208	0.37	0.882	1
Eef1b2	0.000354836	-0.878023	0.848	1	1
Psmb5	0.000374065	-1.13752	0.63	1	1
Mpc2	0.000379616	-0.797316	0.935	1	1
Lnpep	0.000380276	-2.04197	0.13	0.588	1
Dera	0.000385773	-2.33733	0.043	0.412	1
Fam118a	0.000385773	-2.29677	0.043	0.412	1
Cdk16	0.000387064	1.78388	0.783	0.529	1
Erh	0.000390177	1.58008	0.804	0.647	1
Commd6	0.000391366	-1.55068	0.283	0.765	1
Cnn2	0.000396573	1.96916	0.739	0.471	1
Marcks	0.000398754	2.52833	0.696	0.235	1
Gyg	0.000399235	1.56152	0.891	0.882	1
Rnh1	0.000399915	-1.40442	0.239	0.824	1
Fsd2	0.000404933	-1.46047	0.239	0.765	1
Psmb2	0.000410745	-1.17244	0.609	1	1
Dhrs4	0.000413401	-1.65616	0.261	0.765	1
Psmd7	0.000421156	-1.12588	0.63	1	1
Aaed1	0.000424789	-2.42937	0.043	0.412	1
Trub1	0.000424789	-2.37515	0.043	0.412	1
Cox6b1	0.000427135	0.461136	1	1	1
Peg3	0.000438992	1.80741	0.826	0.588	1
Rpl22	0.000452781	-0.593352	0.978	1	1
Tmed9	0.000457024	-1.64543	0.37	0.824	1
Cxx1a	0.00046476	4.33441	0.5	0	1
Tbx18	0.00046476	4.31689	0.5	0	1
Efna5	0.00046476	4.093	0.5	0	1
Gm43672	0.000467464	-2.31281	0.043	0.412	1
Acp6	0.000467464	-2.06916	0.043	0.412	1
Adamts5	0.000467464	-1.82063	0.043	0.412	1
Zdhhc2	0.000472052	2.5025	0.652	0.235	1
Hbb-bt	0.00047616	4.39009	0.543	0.059	1
Snrpb	0.00047624	-1.19912	0.587	0.941	1
Hadh	0.000476864	-1.18685	0.587	1	1
Nfia	0.000478354	1.14306	0.935	0.882	1
Gpi1	0.00047903	-0.747395	0.913	1	1
Ndufa11	0.000479782	-0.695909	0.957	1	1
Irs2	0.000480818	-2.79055	0.087	0.471	1
Ddx24	0.000485263	-1.6018	0.348	0.824	1
Blvrb	0.000487443	-1.50767	0.239	0.824	1
Plk2	0.000489962	-1.5286	0.152	0.647	1
Fra10ac1	0.000514113	-2.36492	0.043	0.412	1
Acvr2b	0.000514113	-2.29338	0.043	0.412	1
Paip1	0.000514113	-2.28482	0.043	0.412	1
Rexo4	0.000514113	-2.19387	0.043	0.412	1
Glmn	0.000514113	-1.84986	0.043	0.412	1
Ddx39	0.000515794	-1.63807	0.13	0.588	1
Nhp2	0.000526766	-1.66139	0.152	0.647	1
Inafm2	0.000535398	-1.47548	0.109	0.588	1
Mrps18a	0.000541877	-1.35592	0.37	0.941	1
Zcrb1	0.000551454	-1.14843	0.609	0.882	1
Slco3a1	0.000556097	-1.93225	0.13	0.588	1
Gm5617	0.00055736	-1.64879	0.196	0.706	1
Psmc5	0.000559049	-1.4797	0.283	0.824	1
Got2	0.00056555	1.26886	0.891	0.882	1
Rasl11b	0.000572928	-1.31307	0.435	0.941	1
Bmp2	0.000578177	1.79741	0.826	0.765	1
Keap1	0.000600714	-2.4273	0.13	0.529	1
Fermt2	0.000600825	-1.17896	0.63	0.941	1
Ndufa12	0.000603988	-0.806139	0.978	1	1
Rpl17	0.000603988	0.739392	1	1	1
Nudc	0.000614823	-1.58466	0.304	0.765	1
Wdr83os	0.000616011	-1.47171	0.261	0.824	1
Pigp	0.00061944	-1.03056	0.565	1	1
Nav2	0.000623652	1.54885	0.87	0.765	1
Cav3	0.000623821	-1.23199	0.543	0.882	1
Rxfp1	0.000632962	1.96621	0.739	0.294	1
Chka	0.000633207	-1.67105	0.065	0.471	1
Nr1d1	0.000643114	-1.5467	0.239	0.765	1
Ctgf	0.000643114	-1.40136	0.261	0.706	1
U2af1	0.000643546	-1.18426	0.435	0.882	1
Bach1	0.000645649	-2.08305	0.13	0.588	1
Psma2	0.000658417	-1.09558	0.674	1	1
Unc5b	0.000668303	1.87781	0.717	0.471	1
Mrps7	0.000677962	-1.28855	0.391	0.941	1
Vimp	0.000691626	3.87143	0.478	0	1
2310036O22Rik	0.000691626	3.62563	0.478	0	1
Creb3l2	0.00071376	1.70317	0.761	0.588	1
Nap1l1	0.000715628	-1.06774	0.587	1	1
Usmg5	0.000716037	0.60963	1	1	1
Atp1b1	0.000716037	0.599369	1	1	1
Malt1	0.000729522	-2.49187	0.087	0.471	1
Afg3l1	0.000729522	-2.35094	0.087	0.471	1
Dhx36	0.000739002	-1.65599	0.217	0.706	1
2310033P09Rik	0.000744619	-2.09748	0.109	0.529	1
Scrn1	0.000744619	-1.87097	0.109	0.529	1
Bcap31	0.000746582	-1.61212	0.37	0.824	1
Tax1bp1	0.000754454	-1.692	0.435	0.765	1
Ndufs7	0.000755269	-0.806296	0.891	1	1
Mcl1	0.000769413	-1.68315	0.391	0.765	1
Snrpg	0.00077941	1.56484	0.739	0.529	1
Ppargc1a	0.000780655	1.65489	0.783	0.706	1
Auts2	0.000781486	-1.50408	0.196	0.706	1
Igf1r	0.00079017	2.23069	0.674	0.353	1
Cox7a1	0.000801157	1.01951	1	1	1
Smdt1	0.000801157	-0.589165	0.978	1	1
Dcpp3	0.000802487	-4.65009	0	0.235	1
Col12a1	0.000802487	-4.5552	0	0.235	1
Gm42067	0.000802487	-4.25835	0	0.235	1
Slc25a33	0.000802487	-3.99257	0	0.235	1
Rbm45	0.000802487	-3.94603	0	0.235	1
Emid1	0.000802487	-3.94319	0	0.235	1
BC022687	0.000802487	-3.92555	0	0.235	1
Irx2	0.000802487	-3.86388	0	0.235	1
Gm11361	0.000802487	-3.86131	0	0.235	1
Rpap2	0.000802487	-3.84144	0	0.235	1
Gm30382	0.000802487	-3.75322	0	0.235	1
Gon7	0.000802487	-3.74586	0	0.235	1
Bend7	0.000802487	-3.72808	0	0.235	1
Mfsd14a	0.000802487	-3.69308	0	0.235	1
Sash1	0.000802487	-3.64497	0	0.235	1
AC163032.1	0.000802487	-3.62133	0	0.235	1
Scube2	0.000802487	-3.61241	0	0.235	1
Plekhn1	0.000802487	-3.60942	0	0.235	1
Hyou1	0.000802487	-3.60889	0	0.235	1
Arhgap20	0.000802487	-3.60662	0	0.235	1
Foxo6	0.000802487	-3.60209	0	0.235	1
Lynx1	0.000802487	-3.59582	0	0.235	1
Gsdme	0.000802487	-3.58391	0	0.235	1
Tg	0.000802487	-3.55238	0	0.235	1
Mindy3	0.000802487	-3.5515	0	0.235	1
Timm29	0.000802487	-3.54904	0	0.235	1
Grk3	0.000802487	-3.53518	0	0.235	1
Crkl	0.000802487	-3.53283	0	0.235	1
Rcc1l	0.000802487	-3.51978	0	0.235	1
Otud1	0.000802487	-3.48456	0	0.235	1
Dnmbp	0.000802487	-3.47132	0	0.235	1
E430024I08Rik	0.000802487	-3.46975	0	0.235	1
Gm30025	0.000802487	-3.45986	0	0.235	1
Slf2	0.000802487	-3.44965	0	0.235	1
0610010F05Rik	0.000802487	-3.44958	0	0.235	1
Prmt9	0.000802487	-3.43414	0	0.235	1
Sgsm3	0.000802487	-3.43366	0	0.235	1
Lin54	0.000802487	-3.42669	0	0.235	1
Atg14	0.000802487	-3.41547	0	0.235	1
Stk35	0.000802487	-3.41281	0	0.235	1
Hectd4	0.000802487	-3.40841	0	0.235	1
Msl3l2	0.000802487	-3.38726	0	0.235	1
Cnot9	0.000802487	-3.38698	0	0.235	1
Ccl2	0.000802487	-3.36635	0	0.235	1
Tsen54	0.000802487	-3.35348	0	0.235	1
Twnk	0.000802487	-3.34526	0	0.235	1
Trp53cor1	0.000802487	-3.33101	0	0.235	1
Phtf1	0.000802487	-3.3103	0	0.235	1
Tor2a	0.000802487	-3.28606	0	0.235	1
Pcnx3	0.000802487	-3.28567	0	0.235	1
Gm15867	0.000802487	-3.25161	0	0.235	1
Tbx2	0.000802487	-3.19961	0	0.235	1
Hdgfl2	0.000802487	-3.0585	0	0.235	1
Sparcl1	0.000805397	-1.90208	0.13	0.588	1
Usf1	0.000817004	-2.86935	0.065	0.412	1
Mybpc3	0.000847153	0.839149	1	1	1
Rragd	0.000875889	-2.19794	0.13	0.529	1
Arid4a	0.000876431	-1.72774	0.174	0.647	1
Dot1l	0.000876431	-1.42707	0.174	0.647	1
Adh5	0.000920572	-1.16928	0.348	0.882	1
Sec11c	0.000925292	-1.43217	0.239	0.824	1
Ndufa4	0.000946579	-0.463568	1	1	1
Mrps31	0.000953507	-1.4635	0.196	0.706	1
Nfic	0.00095517	-1.31034	0.391	0.882	1
Coq10b	0.000957132	-1.74129	0.239	0.706	1
Fibp	0.000994841	-1.14643	0.457	0.941	1
Supt16	0.0010058	-1.84532	0.152	0.588	1
Fras1	0.00100913	2.67622	0.587	0.176	1
Smap2	0.00100956	-2.21278	0.087	0.471	1
Pmm1	0.00101086	-1.88755	0.109	0.529	1
Asf1a	0.0010171	-1.58428	0.283	0.765	1
Gm9843	0.00101823	4.02492	0.457	0	1
Zfos1	0.00101823	3.91454	0.457	0	1
Ppp2r4	0.00101823	3.77408	0.457	0	1
2210013O21Rik	0.00101823	3.767	0.457	0	1
Atp5sl	0.00101823	3.76102	0.457	0	1
0610009L18Rik	0.00101823	3.71683	0.457	0	1
Sdpr	0.00101823	3.53732	0.457	0	1
Sec11a	0.00103616	-1.29988	0.348	0.882	1
Prss23	0.00106058	-2.76189	0.065	0.412	1
Emp2	0.00106583	-1.47829	0.152	0.647	1
Pafah1b1	0.00107681	-1.08515	0.717	0.941	1
Tbk1	0.0010822	-3.02659	0.022	0.294	1
Cdc40	0.00108998	-1.63974	0.109	0.529	1
Flnc	0.00109068	1.46485	0.804	0.647	1
Cdc14b	0.00109241	1.64307	0.739	0.529	1
Mrps26	0.00109259	-1.43917	0.217	0.706	1
As3mt	0.00109367	-2.22398	0.087	0.471	1
Zfp622	0.00109367	-2.05366	0.087	0.471	1
Tnni3	0.00111614	-0.679669	1	1	1
Mmp14	0.00114566	-3.11241	0.043	0.353	1
Akr7a5	0.001157	-1.8002	0.152	0.588	1
Mlf2	0.0011754	0.989372	0.891	1	1
Rpl27a	0.00117862	-0.505466	0.978	1	1
Sf3b1	0.00118183	-1.14801	0.63	0.941	1
3110040N11Rik	0.00120441	-2.94315	0.022	0.294	1
Fbn2	0.00120761	1.48899	0.826	0.824	1
Ddx46	0.00122879	-1.25117	0.174	0.647	1
Txndc15	0.00123344	-1.49534	0.239	0.706	1
Erlec1	0.0012416	-1.15353	0.196	0.765	1
Caprin1	0.00125309	1.69356	0.761	0.529	1
Socs1	0.00125838	-3.23433	0.043	0.353	1
Zfp523	0.00125858	-2.40049	0.065	0.412	1
Sirt1	0.00125858	-2.03259	0.065	0.412	1
Rapgef6	0.00126567	-1.94856	0.109	0.529	1
Faf1	0.00128164	-2.06241	0.087	0.471	1
Zfp608	0.00128164	-2.03492	0.087	0.471	1
Smu1	0.00128164	-1.9443	0.087	0.471	1
Eepd1	0.00128164	-1.80856	0.087	0.471	1
Ppil1	0.00128965	-1.08953	0.435	0.941	1
Prdx4	0.00129208	-1.46363	0.261	0.706	1
Alpk2	0.00129811	-1.1904	0.261	0.824	1
Cdh13	0.00131318	-1.59134	0.239	0.706	1
Trdn	0.00131341	-0.660537	0.978	1	1
Hipk3	0.00132275	1.98939	0.739	0.471	1
Hbegf	0.00132295	-1.71627	0.217	0.706	1
Fosl2	0.00133925	-3.18474	0.022	0.294	1
Gata5	0.00133925	-3.12717	0.022	0.294	1
Gm9803	0.00133925	-2.85685	0.022	0.294	1
Tyw5	0.00133925	-2.84966	0.022	0.294	1
Yrdc	0.00133925	-2.82954	0.022	0.294	1
Cops4	0.00135042	-1.23779	0.391	0.882	1
C1qtnf4	0.00135895	-2.1586	0.13	0.529	1
Usp15	0.0013699	-2.3214	0.065	0.412	1
Tnni3k	0.00138125	-2.77249	0.043	0.353	1
Dpm1	0.00138125	-2.63653	0.043	0.353	1
Itm2b	0.00138416	-0.694802	0.913	1	1
Rps28	0.001386	0.742315	1	1	1
Oaz1	0.001386	-0.452724	1	1	1
Hes1	0.00138643	-1.83252	0.087	0.471	1
Phb	0.00139525	-1.06859	0.457	0.941	1
Anapc15	0.00139899	-1.31851	0.152	0.647	1
Chsy1	0.00139948	1.52584	0.761	0.471	1
Dnajb11	0.00140694	-1.44474	0.283	0.824	1
Psmd13	0.00141151	-1.48887	0.391	0.824	1
Id2	0.00144029	-1.38481	0.435	0.824	1
1810022K09Rik	0.00144029	-1.28913	0.413	0.882	1
Ankrd10	0.00144176	-1.30881	0.217	0.765	1
Dnajb9	0.00145034	-2.13912	0.196	0.588	1
Htra1	0.00145293	-1.8556	0.217	0.647	1
Ybx1	0.00146229	-0.358343	1	1	1
Akr1b3	0.00147045	-1.4111	0.413	0.824	1
Bnip2	0.00147045	-1.33844	0.413	0.824	1
Ict1	0.00148364	3.35704	0.435	0	1
Ttc12	0.00148791	-3.02036	0.022	0.294	1
Nfyb	0.00148791	-2.85285	0.022	0.294	1
Atad2b	0.00148791	-2.7217	0.022	0.294	1
Tars2	0.00148791	-2.57738	0.022	0.294	1
Pnkp	0.00149024	-2.13588	0.065	0.412	1
Hist1h1c	0.00149024	-1.9292	0.065	0.412	1
Eif4a2	0.0014985	1.33841	0.87	0.706	1
Dusp5	0.0015151	-2.92492	0.043	0.353	1
Plscr3	0.0015151	-2.56662	0.043	0.353	1
Sqstm1	0.00152358	-1.52574	0.413	0.882	1
Fbxo30	0.00153118	-2.11874	0.152	0.529	1
Acsl1	0.00155414	-1.48154	0.283	0.765	1
Nnt	0.00158373	2.82574	0.543	0.118	1
Atcayos	0.00160144	-1.28701	0.804	1	1
Timm9	0.00161103	-1.31102	0.326	0.824	1
Parm1	0.00161208	1.54298	0.804	0.588	1
Gfod1	0.00162025	-1.91745	0.065	0.412	1
Rictor	0.00162025	-1.50024	0.065	0.412	1
Pfdn5	0.00162659	-0.594492	1	1	1
Cryab	0.00162659	-0.463677	1	1	1
Dnmt3a	0.00164387	1.48242	0.761	0.529	1
Slc25a10	0.00165165	-2.77213	0.022	0.294	1
Tk1	0.00165165	-2.62699	0.022	0.294	1
Smtn	0.00165165	-2.53625	0.022	0.294	1
Cep85l	0.00165165	-2.48693	0.022	0.294	1
Cttnbp2	0.00165165	-2.46045	0.022	0.294	1
Gm26669	0.00165165	-2.45702	0.022	0.294	1
Micu1	0.00165165	-2.42869	0.022	0.294	1
Tbc1d12	0.00165165	-2.32552	0.022	0.294	1
Lpar4	0.00165165	-2.24099	0.022	0.294	1
Adamts8	0.00165165	-2.17662	0.022	0.294	1
Cacna2d3	0.00165165	-2.15789	0.022	0.294	1
Crtc3	0.00165165	-2.0282	0.022	0.294	1
Wdr47	0.00165165	-2.00827	0.022	0.294	1
Cxcl12	0.00165165	-1.92154	0.022	0.294	1
Etv6	0.00165165	-1.91128	0.022	0.294	1
Tsen2	0.00165165	-1.76231	0.022	0.294	1
Ryr3	0.00165165	-1.14431	0.022	0.294	1
Psma4	0.00165277	-0.940164	0.739	1	1
Gm11789	0.00166082	-2.50992	0.043	0.353	1
Zfp703	0.00166082	-2.38792	0.043	0.353	1
Stx18	0.00166082	-2.30237	0.043	0.353	1
Ubxn1	0.00168149	-0.96594	0.652	0.882	1
Scand1	0.00168194	-1.10345	0.674	1	1
Grhpr	0.00168736	-1.63779	0.196	0.647	1
Aldh2	0.00170467	-1.51621	0.348	0.824	1
Zfp30	0.0017082	-1.44704	0.174	0.647	1
Gata6	0.00171496	0.717959	1	1	1
Rpl23	0.00171496	-0.414984	1	1	1
Cd63	0.00171562	-0.905121	0.63	1	1
Rfc3	0.00174245	-1.95467	0.109	0.471	1
Pccb	0.00175002	-1.7039	0.087	0.471	1
Nrip1	0.00175671	-1.70963	0.217	0.647	1
P4hb	0.0017737	1.29307	0.804	0.647	1
Pirt	0.00178076	2.81717	0.543	0.118	1
Stoml2	0.00178816	-1.32193	0.239	0.706	1
Samm50	0.00179187	-1.31205	0.37	0.824	1
Psmd6	0.00180389	-1.25958	0.435	0.882	1
Plpp2	0.00181933	-2.69065	0.043	0.353	1
Nudt13	0.00181933	-2.21733	0.043	0.353	1
Papss1	0.00181933	-1.92437	0.043	0.353	1
Ier5l	0.00181933	-1.84552	0.043	0.353	1
Akirin1	0.00186717	-1.53247	0.152	0.588	1
H1f0	0.00187054	1.45022	0.739	0.647	1
Smim5	0.00188799	-1.09911	0.478	0.882	1
Tipin	0.00188949	-1.51018	0.087	0.471	1
Prpf6	0.00188949	-1.27702	0.087	0.471	1
Atp5e	0.00190509	0.456937	1	1	1
Samhd1	0.00191212	-1.71313	0.065	0.412	1
Ppil4	0.00192348	-1.50415	0.217	0.706	1
Ube2e1	0.00197721	-1.17803	0.239	0.765	1
Sart3	0.00199163	-2.12383	0.043	0.353	1
Cox7b	0.00200724	-0.734457	1	1	1
Rpl14	0.00200724	0.589232	1	1	1
Cyba	0.002017	-1.85617	0.152	0.529	1
Filip1	0.00202569	-1.07248	0.326	0.824	1
Eif3m	0.00203411	-0.892241	0.609	0.941	1
Tmem14c	0.00203712	-1.07648	0.587	0.882	1
Nit2	0.0020391	-1.3116	0.087	0.471	1
Srrd	0.00207549	-2.09242	0.065	0.412	1
Trafd1	0.00207549	-1.88785	0.065	0.412	1
Pitx2	0.00207549	-1.65609	0.065	0.412	1
Uchl3	0.00207813	-1.61433	0.13	0.529	1
Sh3glb1	0.00208292	-0.969173	0.826	0.941	1
Rras2	0.0020839	2.42575	0.565	0.176	1
Zfp207	0.00209233	2.14495	0.609	0.235	1
Zfp326	0.00211856	-1.06644	0.457	0.882	1
Cs	0.00212615	1.0952	0.848	0.824	1
Tmed10	0.00212889	-0.808347	0.717	1	1
Hmox2	0.0021374	-1.23943	0.348	0.824	1
Egln3	0.00213775	2.52639	0.543	0.176	1
Cxx1b	0.00214037	3.70866	0.413	0	1
Tuba1a	0.00216726	1.02996	0.935	0.941	1
Gstp1	0.00217398	-1.76972	0.217	0.588	1
Nol8	0.0021788	-1.57648	0.043	0.353	1
Ssbp3	0.00219951	-0.764936	0.087	0.471	1
Sod2	0.00222679	-0.554383	0.978	1	1
Sgms1	0.00225158	-1.71064	0.065	0.412	1
Gtf2h5	0.00227148	-1.00138	0.696	0.882	1
Urod	0.00231426	-1.77772	0.217	0.588	1
Tbx5	0.00233543	1.35749	0.826	0.647	1
Rps14	0.00234462	0.497402	1	1	1
Fth1	0.00234462	-0.323632	1	1	1
Ctsc	0.00237142	-1.8296	0.087	0.471	1
Crip1	0.0023953	-1.53256	0.217	0.647	1
Got1	0.0024327	-0.740647	0.804	1	1
Abhd14a	0.00243898	-2.35262	0.087	0.412	1
Aimp1	0.00244238	-1.04747	0.5	0.882	1
Acadvl	0.0024674	-1.03281	0.37	0.882	1
H1fx	0.00250813	-1.37791	0.174	0.647	1
Mrpl20	0.002514	-1.04762	0.587	0.882	1
Mrpl15	0.002514	-0.881865	0.565	0.941	1
Lrrfip1	0.002514	-0.815286	0.565	0.941	1
Bcam	0.00252331	1.39189	0.804	0.706	1
Ccnl1	0.00252568	-1.10751	0.348	0.824	1
Grb10	0.00253009	1.412	0.826	0.824	1
Srf	0.00255701	1.71366	0.63	0.235	1
Copb2	0.00257186	-1.20271	0.348	0.882	1
Phyh	0.00258019	-0.987074	0.565	1	1
Prdx1	0.00258678	-0.842457	0.87	1	1
Vcp	0.00258895	-0.849506	0.696	1	1
Tmsb10	0.00259759	0.687611	1	1	1
Hmgb2	0.0027072	-1.02251	0.413	0.941	1
Pygb	0.00278065	1.57682	0.761	0.529	1
Tmem176a	0.00278076	-1.13645	0.283	0.765	1
Aplp2	0.0027998	1.02234	0.935	0.941	1
Ak1	0.00284715	1.07237	0.87	0.882	1
Map1lc3b	0.00286354	-0.691718	0.87	1	1
Cox20	0.00287528	0.687114	1	1	1
Cct4	0.00289082	-0.9279	0.652	0.941	1
Actg1	0.00289258	1.21608	0.891	0.706	1
Elf2	0.00289545	-1.22497	0.304	0.765	1
Strip2	0.00291518	1.54638	0.696	0.471	1
Spg7	0.00292828	-1.6057	0.13	0.529	1
Kcng2	0.00293643	-1.0797	0.565	0.941	1
Shox2	0.0030237	0.870865	0.957	1	1
Myh11	0.00305846	3.69147	0.391	0	1
Gm14698	0.00305846	3.59525	0.391	0	1
Erbb2ip	0.00305846	3.33633	0.391	0	1
Ank1	0.00306434	-0.928995	0.63	0.941	1
Plpp1	0.00307041	-2.15487	0.087	0.412	1
Ndufa8	0.00308856	-0.74162	0.891	0.941	1
Prmt1	0.00309374	-1.3319	0.435	0.824	1
Trpm7	0.00311344	-1.29986	0.283	0.765	1
Rpp25l	0.00313241	-1.59853	0.13	0.529	1
Trim63	0.00313446	-0.880818	0.674	1	1
Snrpd1	0.00317329	-1.1613	0.478	0.941	1
Ppp1cb	0.00324742	0.943098	0.935	0.824	1
Timp2	0.00326134	-1.25715	0.435	0.824	1
Rlf	0.00331195	-2.2089	0.087	0.412	1
Hdac2	0.003334	1.19457	0.804	0.588	1
Eprs	0.00333927	-1.18414	0.326	0.824	1
Rbbp6	0.0033404	-1.1084	0.413	0.824	1
Tbca	0.00334249	0.819163	0.957	1	1
Dctn1	0.00336493	-1.4296	0.152	0.588	1
Fbxw7	0.00336493	-1.20394	0.152	0.588	1
Crebrf	0.00336493	-1.18768	0.152	0.588	1
Pkp4	0.00340144	1.49062	0.696	0.471	1
Furin	0.00340933	1.63468	0.739	0.588	1
Aldh5a1	0.00342115	2.77233	0.522	0.176	1
Arf2	0.00343639	-1.90772	0.152	0.529	1
Strap	0.00343717	-1.1886	0.413	0.882	1
Rcan1	0.00343883	-1.52912	0.217	0.647	1
Ccnd2	0.00346631	0.956477	0.848	0.882	1
Bsg	0.00350955	-0.641377	0.913	1	1
Sgk3	0.00357068	-2.33576	0.087	0.412	1
Hddc3	0.00357925	1.51796	0.674	0.529	1
Ccni	0.00364371	1.21848	0.783	0.706	1
Mrpl57	0.00365405	-1.18348	0.457	0.941	1
Cuedc2	0.0037108	-1.12697	0.413	0.824	1
Ppa2	0.00374893	-0.965484	0.435	1	1
Adk	0.0037865	-0.952331	0.565	0.941	1
Sh3gl3	0.00384767	-1.98872	0.087	0.412	1
Wdr1	0.00385023	1.94192	0.587	0.235	1
Mzt2	0.00385116	-1.80143	0.109	0.471	1
Iws1	0.00385116	-1.52704	0.109	0.471	1
Rnd3	0.00393656	-1.97508	0.13	0.471	1
Psmd12	0.00394544	-1.23465	0.478	0.882	1
Mef2c	0.00396003	0.902805	0.891	0.941	1
Agl	0.00398297	1.79049	0.63	0.412	1
Cltb	0.00403239	-1.41519	0.348	0.765	1
Dcpp2	0.00404996	-5.0031	0	0.176	1
Mpped2	0.00404996	-4.89283	0	0.176	1
Areg	0.00404996	-4.74773	0	0.176	1
Cbfa2t3	0.00404996	-4.1472	0	0.176	1
Mir670hg	0.00404996	-4.08583	0	0.176	1
Cdo1	0.00404996	-3.93807	0	0.176	1
Irx3	0.00404996	-3.82778	0	0.176	1
Mrnip	0.00404996	-3.75579	0	0.176	1
Slfn5	0.00404996	-3.75569	0	0.176	1
9930104L06Rik	0.00404996	-3.75351	0	0.176	1
Washc4	0.00404996	-3.62307	0	0.176	1
Erg28	0.00404996	-3.60978	0	0.176	1
Ntsr1	0.00404996	-3.57232	0	0.176	1
Efl1	0.00404996	-3.56347	0	0.176	1
Patj	0.00404996	-3.53661	0	0.176	1
Herc6	0.00404996	-3.51765	0	0.176	1
H2-D1	0.00404996	-3.47099	0	0.176	1
Tmem35a	0.00404996	-3.44958	0	0.176	1
C1qtnf12	0.00404996	-3.43743	0	0.176	1
AL583891.1	0.00404996	-3.42607	0	0.176	1
Fam98c	0.00404996	-3.41449	0	0.176	1
Grm4	0.00404996	-3.41449	0	0.176	1
Fgfr1	0.00404996	-3.40828	0	0.176	1
Mbip	0.00404996	-3.36858	0	0.176	1
Riok2	0.00404996	-3.36167	0	0.176	1
Ptpa	0.00404996	-3.32191	0	0.176	1
Mob3c	0.00404996	-3.31643	0	0.176	1
Fam241a	0.00404996	-3.28997	0	0.176	1
Gm15446	0.00404996	-3.2883	0	0.176	1
Gatd1	0.00404996	-3.28342	0	0.176	1
Washc1	0.00404996	-3.28342	0	0.176	1
Nmi	0.00404996	-3.27957	0	0.176	1
4631405J19Rik	0.00404996	-3.27844	0	0.176	1
Eef1akmt2	0.00404996	-3.27332	0	0.176	1
Ampd3	0.00404996	-3.25368	0	0.176	1
Rbfox1	0.00404996	-3.23762	0	0.176	1
Chmp1b	0.00404996	-3.22804	0	0.176	1
Cstad	0.00404996	-3.21845	0	0.176	1
Erap1	0.00404996	-3.20971	0	0.176	1
Gm33195	0.00404996	-3.19537	0	0.176	1
Gm28727	0.00404996	-3.19219	0	0.176	1
Gm49336	0.00404996	-3.17837	0	0.176	1
Igsf10	0.00404996	-3.17646	0	0.176	1
Rapgef4	0.00404996	-3.16834	0	0.176	1
Nfkbid	0.00404996	-3.15433	0	0.176	1
Prune1	0.00404996	-3.14857	0	0.176	1
Vamp1	0.00404996	-3.14661	0	0.176	1
Fam13b	0.00404996	-3.14583	0	0.176	1
Cdh6	0.00404996	-3.1371	0	0.176	1
Gm8251	0.00404996	-3.13091	0	0.176	1
Eipr1	0.00404996	-3.13091	0	0.176	1
Faap24	0.00404996	-3.11551	0	0.176	1
Ccdc66	0.00404996	-3.11101	0	0.176	1
Rida	0.00404996	-3.10833	0	0.176	1
Atm	0.00404996	-3.09638	0	0.176	1
Lnpk	0.00404996	-3.09558	0	0.176	1
Rflnb	0.00404996	-3.09179	0	0.176	1
Tug1	0.00404996	-3.09099	0	0.176	1
Selenoi	0.00404996	-3.08155	0	0.176	1
Nexmif	0.00404996	-3.07553	0	0.176	1
CAAA01118383.1	0.00404996	-3.07237	0	0.176	1
Epha5	0.00404996	-3.0673	0	0.176	1
Polg2	0.00404996	-3.06627	0	0.176	1
Wdcp	0.00404996	-3.05585	0	0.176	1
Gm29367	0.00404996	-3.05537	0	0.176	1
Abi3bp	0.00404996	-3.04916	0	0.176	1
Carns1	0.00404996	-3.04302	0	0.176	1
Plpbp	0.00404996	-3.04086	0	0.176	1
Fstl4	0.00404996	-3.03835	0	0.176	1
Adnp	0.00404996	-3.02753	0	0.176	1
Kcna6	0.00404996	-3.01719	0	0.176	1
Arap2	0.00404996	-3.0164	0	0.176	1
Zfp711	0.00404996	-3.00568	0	0.176	1
Sema3c	0.00404996	-2.99968	0	0.176	1
Ablim2	0.00404996	-2.99968	0	0.176	1
5730480H06Rik	0.00404996	-2.99721	0	0.176	1
Gins2	0.00404996	-2.98595	0	0.176	1
Smim27	0.00404996	-2.97856	0	0.176	1
Col22a1	0.00404996	-2.97401	0	0.176	1
Lcmt2	0.00404996	-2.9574	0	0.176	1
Dscc1	0.00404996	-2.94124	0	0.176	1
Carmn	0.00404996	-2.93025	0	0.176	1
Ror1	0.00404996	-2.91546	0	0.176	1
Pnp	0.00404996	-2.91251	0	0.176	1
Pdxp	0.00404996	-2.91251	0	0.176	1
Plin5	0.00404996	-2.90134	0	0.176	1
Atn1	0.00404996	-2.88965	0	0.176	1
Bub1b	0.00404996	-2.88871	0	0.176	1
Ints11	0.00404996	-2.87901	0	0.176	1
Tspan17	0.00404996	-2.87901	0	0.176	1
Cnnm2	0.00404996	-2.8739	0	0.176	1
Tlcd2	0.00404996	-2.86543	0	0.176	1
Gadl1	0.00404996	-2.83911	0	0.176	1
Utp14b	0.00404996	-2.81002	0	0.176	1
Tmem250-ps	0.00404996	-2.81002	0	0.176	1
Miga1	0.00404996	-2.79756	0	0.176	1
Virma	0.00404996	-2.79756	0	0.176	1
Panx1	0.00404996	-2.79756	0	0.176	1
Rab40b	0.00404996	-2.79756	0	0.176	1
Inpp4b	0.00404996	-2.79436	0	0.176	1
Rxrg	0.00404996	-2.79135	0	0.176	1
Kcnj2	0.00404996	-2.79135	0	0.176	1
Ifi27	0.00404996	-2.76086	0	0.176	1
Fam110a	0.00404996	-2.73972	0	0.176	1
Cars	0.00404996	-2.73591	0	0.176	1
Ints14	0.00404996	-2.72329	0	0.176	1
Abhd17a	0.00405087	-1.46094	0.283	0.706	1
Dynll1	0.0040731	0.737817	1	0.882	1
Ndufb2	0.00407399	0.641687	1	1	1
Nexn	0.00407399	-0.528068	0.978	1	1
Zbtb8os	0.00408523	-1.28549	0.13	0.529	1
Nkap	0.00414404	-1.93339	0.087	0.412	1
Ppib	0.00424486	-0.85718	0.609	1	1
Eef2	0.00427813	0.699023	1	1	1
Tenm3	0.00433058	3.32861	0.37	0	1
Gm5900	0.00433058	3.29513	0.37	0	1
Surf2	0.00434331	-3.05443	0.043	0.294	1
Cep83	0.00436133	-1.16873	0.13	0.529	1
Frat2	0.00437355	-2.55295	0.065	0.353	1
Gm26881	0.00437355	-2.14599	0.065	0.353	1
H2-Ke6	0.00442287	-1.72152	0.109	0.471	1
Rock1	0.00442948	-1.26765	0.413	0.765	1
Capzb	0.00443408	1.08447	0.87	0.824	1
Fbxl22	0.00443408	-1.01413	0.804	1	1
Arl4a	0.00443969	-1.61503	0.261	0.647	1
Vapa	0.0044593	-1.18201	0.652	0.882	1
Mgst3	0.0044593	-0.815933	0.609	1	1
Chordc1	0.00446098	-1.85207	0.087	0.412	1
Chn1	0.00446098	-1.7233	0.087	0.412	1
Vdac2	0.0044867	-0.653727	0.913	1	1
Rpl37	0.00449151	0.471355	1	1	1
Scamp2	0.0044943	-1.41792	0.196	0.588	1
Rgs10	0.00450581	-1.60258	0.217	0.588	1
Acyp2	0.00450643	-1.21241	0.37	0.824	1
Pmpcb	0.00453272	-1.0509	0.5	0.882	1
Csde1	0.00456074	0.982819	0.891	0.824	1
Ccdc141	0.00459687	0.948378	0.935	0.941	1
Zwint	0.00460539	1.10994	0.804	0.882	1
Uba52	0.00462137	1.45511	0.717	0.529	1
Mkrn1	0.00465424	-1.39858	0.13	0.529	1
Hexa	0.00465424	-1.38682	0.13	0.529	1
Adora1	0.00468829	2.7845	0.478	0.118	1
Itm2c	0.00468829	-1.29777	0.261	0.706	1
Sdhc	0.00471248	0.945652	1	0.824	1
Cfl2	0.00471448	0.65301	1	1	1
Rps21	0.00471448	-0.461454	1	1	1
Jph2	0.0047292	1.29324	0.739	0.529	1
H2afy	0.0047354	-1.4906	0.152	0.529	1
Stk38l	0.00473665	-1.15585	0.109	0.471	1
4921524J17Rik	0.00474115	-1.19362	0.304	0.765	1
Npnt	0.00474672	2.09093	0.587	0.235	1
Asap1	0.00479973	-1.97493	0.087	0.412	1
Rbx1	0.00481189	-0.602091	0.891	0.941	1
Ccdc25	0.00482969	-1.24431	0.239	0.706	1
Bambi	0.00483548	-1.14229	0.522	0.941	1
Rab9	0.00485369	-1.10944	0.326	0.824	1
Dad1	0.00486228	-0.699396	0.783	1	1
Pla2g16	0.00491057	-0.965658	0.37	0.882	1
Epc1	0.00494305	-1.0249	0.239	0.647	1
Gnas	0.00494742	-0.48451	1	1	1
Clip3	0.00495451	2.37284	0.478	0.118	1
Fam173b	0.00500942	-1.135	0.174	0.588	1
Lysmd3	0.00507045	-1.72152	0.109	0.471	1
Cdc16	0.00507045	-1.51073	0.109	0.471	1
Eif2b2	0.00507045	-1.34514	0.109	0.471	1
Chchd7	0.005073	-0.666811	0.761	1	1
Dag1	0.00509552	1.27623	0.717	0.471	1
3632451O06Rik	0.00512625	-1.91068	0.065	0.353	1
Hebp1	0.00513625	-1.45344	0.326	0.706	1
Gnl3	0.00514061	-1.78111	0.13	0.471	1
Doc2g	0.0051616	-1.83487	0.087	0.412	1
Dixdc1	0.0051616	-1.6874	0.087	0.412	1
Napg	0.0051616	-1.65526	0.087	0.412	1
Plekhm2	0.0051616	-1.64391	0.087	0.412	1
Thbs1	0.00518468	-3.15977	0.043	0.294	1
Kctd8	0.00518468	-2.44696	0.043	0.294	1
Marc2	0.00523432	-1.35122	0.261	0.706	1
Phpt1	0.00526238	1.47783	0.674	0.412	1
Ctcf	0.00531975	-1.63292	0.196	0.529	1
Cbx6	0.00532164	1.53826	0.739	0.588	1
Chtop	0.00535099	1.34669	0.717	0.471	1
Nsmce1	0.00538721	-1.30961	0.304	0.706	1
Nol11	0.00542537	-1.39779	0.109	0.471	1
Fhod3	0.00543845	-1.26809	0.391	0.824	1
Smyd1	0.00543921	0.847817	0.957	0.882	1
Cldnd1	0.00545302	-1.01596	0.435	0.824	1
Gm26532	0.00552398	-3.53594	0.022	0.235	1
Igfbpl1	0.00552398	-3.36301	0.022	0.235	1
Nap1l5	0.00552398	-3.09493	0.022	0.235	1
Gm26526	0.00552398	-2.69398	0.022	0.235	1
Tmem158	0.00552398	-2.62492	0.022	0.235	1
Cib1	0.0055449	-2.22523	0.065	0.353	1
Tyms	0.0055449	-2.22011	0.065	0.353	1
Pinx1	0.0055449	-1.95971	0.065	0.353	1
Arhgap29	0.00554794	-1.64924	0.087	0.412	1
Pdhb	0.00555607	0.858591	0.891	0.941	1
Coq7	0.00561959	-1.01956	0.565	0.941	1
Pdxdc1	0.00564292	-1.18352	0.13	0.529	1
Polr1a	0.00565832	-2.53579	0.043	0.294	1
Nptn	0.00570772	0.902478	0.978	0.882	1
Itgb1	0.0057698	-0.808113	0.717	1	1
Fbxo22	0.00579075	-1.45369	0.217	0.647	1
Ephx2	0.00580257	-1.61412	0.109	0.471	1
Ogdh	0.00582631	0.822591	0.935	0.824	1
Yif1a	0.00583716	-0.965572	0.261	0.706	1
Spata13	0.00586128	2.11678	0.522	0.176	1
Hmbs	0.00586128	-1.05584	0.304	0.765	1
Oaz2	0.00588533	1.35479	0.717	0.588	1
Cfap20	0.00591377	-1.27748	0.37	0.765	1
Ddost	0.00591377	-0.982378	0.326	0.882	1
Mob1b	0.0059364	1.07035	0.87	0.882	1
Fam162a	0.0059532	0.899693	0.891	0.882	1
Usp7	0.00596018	-1.59639	0.087	0.412	1
Kin	0.00596018	-1.55007	0.087	0.412	1
Cd24a	0.00597789	2.17698	0.565	0.294	1
Rfc4	0.00599416	-1.98842	0.065	0.353	1
Thap2	0.00599416	-1.95522	0.065	0.353	1
Rab20	0.00601071	-1.01451	0.304	0.824	1
Gnb1	0.00602838	1.40042	0.739	0.529	1
Gtf2b	0.00603515	-1.24333	0.196	0.588	1
Sh2d4a	0.00607856	3.63941	0.348	0	1
Rps26-ps1	0.00607856	3.54518	0.348	0	1
Fam63b	0.00607856	3.4225	0.348	0	1
Slc12a6	0.00607856	3.37816	0.348	0	1
Apoa1bp	0.00607856	3.32849	0.348	0	1
Gm10250	0.00607856	3.28502	0.348	0	1
Mesdc2	0.00607856	3.05738	0.348	0	1
Sept9	0.00607856	3.01499	0.348	0	1
Igfbp7	0.00611142	-2.93979	0.022	0.235	1
Igsf8	0.00611142	-2.73966	0.022	0.235	1
Ift74	0.00611142	-2.67168	0.022	0.235	1
Igsf1	0.00611142	-2.65452	0.022	0.235	1
Relb	0.00611142	-2.52115	0.022	0.235	1
Nsmce4a	0.00613109	-1.10327	0.37	0.824	1
Utp18	0.00617066	-2.62821	0.043	0.294	1
Mxra8	0.00617066	-2.35517	0.043	0.294	1
Sc5d	0.00617066	-2.23129	0.043	0.294	1
Phrf1	0.00617066	-2.11546	0.043	0.294	1
Cep57	0.00620326	-1.47645	0.109	0.471	1
Otulin	0.00620326	-1.2113	0.109	0.471	1
Arf5	0.0062442	-0.70895	0.761	0.941	1
Srsf1	0.00628782	1.66794	0.565	0.294	1
Tubb2b	0.00631612	2.61484	0.5	0.176	1
Pfdn6	0.00633188	-1.28801	0.435	0.824	1
Rpp21	0.00633188	-1.10375	0.435	0.824	1
Nr1h2	0.00635767	-1.18113	0.174	0.588	1
Heca	0.00639983	-1.61479	0.087	0.412	1
Fcgrt	0.00639983	-1.415	0.087	0.412	1
Tmem128	0.00639983	-1.2635	0.087	0.412	1
Fam20c	0.00639983	-1.24069	0.087	0.412	1
Dnajc21	0.00639983	-1.14649	0.087	0.412	1
Acp1	0.00639999	-1.03879	0.5	0.882	1
Zfand5	0.00643534	-1.06231	0.804	0.882	1
Srpr	0.00644815	-0.881664	0.37	0.824	1
Tubb4b	0.00645811	-1.49314	0.457	0.824	1
Psmd10	0.006464	-1.32332	0.152	0.529	1
Memo1	0.00647596	-1.99502	0.065	0.353	1
Zkscan5	0.00647596	-1.90841	0.065	0.353	1
Cep350	0.00647596	-1.88709	0.065	0.353	1
Ddhd2	0.00647596	-1.88234	0.065	0.353	1
Hivep2	0.00647596	-1.81531	0.065	0.353	1
Cmc4	0.00647596	-1.75337	0.065	0.353	1
Fam76b	0.00647596	-1.66401	0.065	0.353	1
Higd1a	0.00652279	-0.624721	0.826	1	1
Coa5	0.00666325	1.54914	0.609	0.294	1
Dtd1	0.00666821	-1.69758	0.13	0.471	1
Taf1d	0.00666821	-1.50269	0.13	0.471	1
Sorbs1	0.0067244	-2.27711	0.043	0.294	1
Dtd2	0.0067244	-2.14585	0.043	0.294	1
Eif2b3	0.0067244	-2.10887	0.043	0.294	1
Phf13	0.0067244	-1.92472	0.043	0.294	1
Polr1c	0.0067244	-1.77035	0.043	0.294	1
H2-K1	0.00675455	-3.11962	0.022	0.235	1
Pcdh7	0.00675455	-3.07945	0.022	0.235	1
Lrrc20	0.00675455	-2.83985	0.022	0.235	1
Rrp9	0.00675455	-2.68098	0.022	0.235	1
Ctbp2	0.00675455	-2.67066	0.022	0.235	1
Gm11627	0.00675455	-2.6446	0.022	0.235	1
Cep112	0.00675455	-2.6357	0.022	0.235	1
Lamb3	0.00675455	-2.63249	0.022	0.235	1
Cdkl3	0.00675455	-2.60065	0.022	0.235	1
Cdk1	0.00675455	-2.49573	0.022	0.235	1
Yipf7	0.00675455	-2.48106	0.022	0.235	1
Cbwd1	0.00675455	-2.45419	0.022	0.235	1
Baiap2l1	0.00675455	-2.4505	0.022	0.235	1
Ccdc130	0.00675455	-2.39217	0.022	0.235	1
Oma1	0.00675455	-2.38804	0.022	0.235	1
Stk11ip	0.00675455	-2.35162	0.022	0.235	1
Cntln	0.00675455	-2.29773	0.022	0.235	1
Hmgn5	0.00677454	-1.29817	0.196	0.588	1
Smap1	0.00677454	-1.24462	0.196	0.588	1
Cish	0.00677454	-1.09787	0.196	0.588	1
Bcas2	0.00677989	-1.23046	0.37	0.824	1
Gatad2b	0.00678216	1.63832	0.63	0.353	1
Pea15a	0.00680838	1.2027	0.739	0.471	1
Map2k2	0.00683455	-0.75331	0.674	1	1
Snrpa1	0.00685045	-1.14033	0.217	0.647	1
Gkap1	0.00685229	-1.08457	0.304	0.765	1
Ccnd1	0.00685917	2.82142	0.478	0.118	1
Ddo	0.00686845	-1.32204	0.087	0.412	1
Eef1a1	0.00689143	0.374704	1	1	1
Glod4	0.00690135	-1.57824	0.239	0.647	1
Cluh	0.00696472	2.06939	0.543	0.235	1
Iscu	0.0069742	-0.910893	0.565	0.882	1
Tmem160	0.00698362	-0.880018	0.652	0.941	1
Gm1673	0.00698659	-1.10139	0.413	0.882	1
Snrnp200	0.00699232	-1.97371	0.065	0.353	1
Med31	0.00699232	-1.95486	0.065	0.353	1
Gss	0.00699232	-1.8384	0.065	0.353	1
4833439L19Rik	0.00704798	1.45178	0.674	0.412	1
Snx6	0.00709127	-1.05716	0.239	0.706	1
Serinc3	0.00710469	0.856389	0.87	0.765	1
Cpox	0.00713887	1.37811	0.696	0.588	1
Tbrg1	0.00724061	-1.04717	0.217	0.647	1
Runx1t1	0.0073129	1.51219	0.696	0.529	1
3110082I17Rik	0.00732241	-2.1332	0.043	0.294	1
Cpsf4	0.00732241	-2.01888	0.043	0.294	1
Runx1	0.00732241	-1.95781	0.043	0.294	1
Phf1	0.00732241	-1.91518	0.043	0.294	1
Mrps34	0.00732578	-1.00342	0.326	0.824	1
Sin3b	0.00735268	-0.999034	0.391	0.882	1
Psen1	0.00736767	-1.65798	0.087	0.412	1
Atp6v0a2	0.00736767	-1.43654	0.087	0.412	1
R3hdm1	0.00738083	1.83554	0.543	0.176	1
Pak2	0.00738677	-1.20137	0.304	0.706	1
Flywch1	0.00745786	-2.50392	0.022	0.235	1
Thap1	0.00745786	-2.49338	0.022	0.235	1
Pir	0.00745786	-2.41443	0.022	0.235	1
Snrnp35	0.00745786	-2.40406	0.022	0.235	1
Zbtb2	0.00745786	-2.30776	0.022	0.235	1
Mtr	0.00745786	-2.29467	0.022	0.235	1
Fkbp11	0.00745786	-2.29236	0.022	0.235	1
Scap	0.00745786	-2.26092	0.022	0.235	1
Zbtb1	0.00745786	-2.25838	0.022	0.235	1
Cnp	0.00745786	-2.24372	0.022	0.235	1
Zfp354c	0.00745786	-2.24067	0.022	0.235	1
Il15	0.00745786	-2.18516	0.022	0.235	1
Mum1	0.00745786	-2.15729	0.022	0.235	1
Wdyhv1	0.00745786	-2.08874	0.022	0.235	1
Jam2	0.00745786	-2.05957	0.022	0.235	1
Vps39	0.00745786	-2.04529	0.022	0.235	1
Igsf9b	0.00745786	-2.04113	0.022	0.235	1
Noc4l	0.00745786	-1.98919	0.022	0.235	1
Rab33a	0.00745786	-1.48893	0.022	0.235	1
Pin4	0.00751253	-0.97955	0.348	0.765	1
Nfkbil1	0.00754536	-1.76379	0.065	0.353	1
Man1c1	0.00754536	-1.46929	0.065	0.353	1
Suclg1	0.00755362	-0.618441	0.913	1	1
Nudt2	0.00757438	-1.10744	0.174	0.588	1
Klhl9	0.00758975	1.84305	0.63	0.412	1
Eci1	0.00766628	-0.854607	0.522	1	1
Tctex1d2	0.00769465	-1.49828	0.239	0.647	1
Kcnj3	0.00770146	1.9921	0.609	0.353	1
Rap1b	0.00770146	-1.41283	0.457	0.765	1
Nfu1	0.00770146	-1.0931	0.435	0.824	1
Yaf2	0.0077134	-0.917305	0.37	0.882	1
Fam76a	0.00772479	-1.21119	0.283	0.706	1
Ndufv1	0.00775323	-0.713479	0.761	1	1
Phf20l1	0.00777827	-1.23616	0.283	0.765	1
Glrx3	0.00778432	-0.767799	0.609	0.941	1
Atp1b2	0.00786909	1.72814	0.587	0.235	1
Sema4d	0.0078992	-1.24704	0.087	0.412	1
Dhrs1	0.00792764	-1.81459	0.109	0.412	1
Dkc1	0.00796771	-2.02062	0.043	0.294	1
Traf5	0.00796771	-1.93915	0.043	0.294	1
Ptk2b	0.00796771	-1.92921	0.043	0.294	1
Pbdc1	0.00796771	-1.77631	0.043	0.294	1
Ypel5	0.00798017	-1.30567	0.217	0.588	1
Eif5	0.0080323	-0.777936	0.674	0.882	1
Crls1	0.00806681	-1.03291	0.109	0.471	1
Mettl5	0.00806968	-1.35381	0.13	0.471	1
Pgam1	0.00809294	0.658926	0.935	0.941	1
Ppcs	0.0081373	-1.54622	0.065	0.353	1
Arpc2	0.00816062	-0.725093	0.783	1	1
Lzts2	0.00818825	2.09804	0.5	0.176	1
Pde3a	0.00826644	3.06087	0.391	0.059	1
Trmt1l	0.00826644	2.92605	0.391	0.059	1
Ubc	0.00827248	-0.672198	0.891	1	1
Cox7a2	0.00828797	-0.278257	1	1	1
Echs1	0.00831331	-0.739295	0.696	1	1
Ube2s	0.00841198	-1.01878	0.652	0.941	1
Grik5	0.00846154	3.26681	0.326	0	1
Plscr2	0.00846154	3.24545	0.326	0	1
Mllt4	0.00846154	3.183	0.326	0	1
Rpl6l	0.00846154	3.10094	0.326	0	1
BC026585	0.00846154	3.05845	0.326	0	1
l7Rn6	0.00846154	3.00877	0.326	0	1
Adamtsl5	0.00846154	2.89363	0.326	0	1
Lamb2	0.00846154	-2.58634	0.152	0.471	1
Timm22	0.00847113	-0.891377	0.261	0.706	1
Ankrd33b	0.00847493	-1.61356	0.109	0.412	1
Dmpk	0.00853352	2.09068	0.435	0.059	1
Mboat2	0.00859233	-1.76332	0.13	0.471	1
Ccdc22	0.00866347	-2.04811	0.043	0.294	1
Foxp4	0.00866347	-1.95674	0.043	0.294	1
Mnt	0.00866347	-1.88003	0.043	0.294	1
Noc2l	0.00866347	-1.84982	0.043	0.294	1
Itpk1	0.00866347	-1.81976	0.043	0.294	1
Mfsd10	0.00866347	-1.71855	0.043	0.294	1
Ormdl2	0.00866347	-1.70309	0.043	0.294	1
Rgs7bp	0.00866347	-1.6028	0.043	0.294	1
Secisbp2	0.00866347	-1.50537	0.043	0.294	1
Kdr	0.00866347	-1.37994	0.043	0.294	1
Cyc1	0.00866647	-0.536781	0.913	1	1
Vdac1	0.00867449	-0.479693	0.978	1	1
Slc25a4	0.00867449	-0.332061	1	1	1
Ccdc6	0.00874359	2.86485	0.391	0.059	1
Mecr	0.00877048	-1.07943	0.065	0.353	1
Gys1	0.00879158	2.44435	0.478	0.176	1
Khdrbs3	0.00889697	-0.837903	0.435	0.824	1
Asxl1	0.00899127	-1.28316	0.196	0.588	1
Snhg12	0.00899587	-0.664352	0.174	0.588	1
Ing1	0.0090201	-1.32579	0.283	0.706	1
Wbp4	0.0090201	-1.17271	0.283	0.706	1
Mfsd6	0.00902482	2.00412	0.522	0.235	1
Xrn2	0.00903821	-1.21507	0.239	0.647	1
Lonp2	0.00905575	-1.78832	0.109	0.412	1
Ndufs2	0.00907372	-0.676007	0.935	1	1
Rpl23a	0.00907704	0.656365	1	1	1
Npm1	0.00907704	-0.571214	0.978	1	1
Cox5b	0.00907704	0.472295	1	1	1
Ddx3x	0.00908912	1.17629	0.739	0.647	1
Suco	0.00914504	-1.40813	0.13	0.471	1
Trappc2l	0.00918022	-0.894239	0.457	0.882	1
Cript	0.00918585	1.01538	0.783	0.824	1
Psmc2	0.00929709	-1.13262	0.304	0.765	1
Rabac1	0.00929931	-0.948172	0.63	0.941	1
Mga	0.00933597	1.71449	0.565	0.294	1
Spon1	0.00936372	1.09435	0.761	0.529	1
Csrp2	0.00949619	0.648513	1	1	1
Rps11	0.00949619	-0.464322	1	1	1
Tomm40l	0.00953053	2.50679	0.435	0.118	1
Dusp6	0.00953146	-2.17131	0.087	0.353	1
Scnm1	0.00953146	-2.02758	0.087	0.353	1
Wtip	0.00955279	-1.80533	0.152	0.471	1
Zdhhc6	0.00972927	-1.4813	0.13	0.471	1
Rsrc1	0.00988945	-1.02655	0.5	1	1
Mafb	0.00989419	-1.33678	0.261	0.706	1
Pdgfa	0.00995522	-1.08251	0.478	0.882	1
Serf1	0.0100962	0.894553	0.783	0.588	1
Adprhl1	0.0101251	-0.823469	0.739	1	1
Cenpw	0.0102276	-2.1475	0.087	0.353	1
Adam33	0.0102556	1.67843	0.609	0.353	1
Srp9	0.0103101	-0.809838	0.587	0.941	1
Pef1	0.0103251	-1.76401	0.109	0.412	1
Ssb	0.0103534	-0.901858	0.543	0.882	1
Rpl12	0.0103866	-0.718455	0.978	1	1
Rpl35a	0.0103866	0.432985	1	1	1
Ndufb11	0.0103866	-0.321559	1	1	1
Sec23a	0.0104648	1.88141	0.522	0.235	1
Frem2	0.0105272	2.12721	0.5	0.235	1
Fam189a2	0.0105424	-1.26204	0.304	0.706	1
Pnn	0.0105424	-0.93639	0.283	0.765	1
Pten	0.0106137	-1.04593	0.348	0.765	1
Map1b	0.0107793	-0.73494	0.826	1	1
Cmya5	0.0107825	-0.986361	0.391	0.765	1
Wsb1	0.01079	-0.764109	0.304	0.765	1
Rif1	0.0108989	-1.39198	0.174	0.529	1
Polr2c	0.0109203	-1.05704	0.457	0.824	1
Ssbp1	0.0109203	-0.891633	0.457	0.824	1
Asb2	0.0109203	-0.625391	0.457	0.824	1
Gtf2f1	0.0109686	-2.2588	0.087	0.353	1
Rars	0.0110172	-1.60181	0.109	0.412	1
Fance	0.0110172	-1.45011	0.109	0.412	1
Ubtd1	0.011072	-0.888443	0.196	0.647	1
Tpr	0.011223	-0.943976	0.587	1	1
Leprotl1	0.0115333	-1.37607	0.174	0.529	1
Kcmf1	0.01154	-0.796821	0.609	0.882	1
Arxes2	0.01158	1.67277	0.587	0.353	1
Zfp330	0.0116135	-0.760866	0.283	0.824	1
Eif4e2	0.0116413	-1.21366	0.326	0.647	1
Setd3	0.0116413	-1.18175	0.283	0.765	1
Pvrl2	0.0116865	3.31353	0.304	0	1
9430016H08Rik	0.0116865	3.19217	0.304	0	1
Prkrir	0.0116865	3.18092	0.304	0	1
Hiatl1	0.0116865	3.17442	0.304	0	1
Stam	0.0116865	3.13712	0.304	0	1
Toporsos	0.0116865	3.11952	0.304	0	1
Zim1	0.0116865	3.07012	0.304	0	1
Med23	0.0116865	2.7225	0.304	0	1
Aptx	0.0116865	-1.29895	0.13	0.471	1
Elf1	0.0116865	-1.27968	0.13	0.471	1
Slc50a1	0.011757	-1.84592	0.087	0.353	1
Nxf1	0.0118116	-0.664807	0.696	0.941	1
Kcnh2	0.011845	-0.926031	0.565	0.941	1
Fign	0.0118998	2.96742	0.37	0.059	1
Lnx1	0.0118998	2.86629	0.37	0.059	1
Pcolce	0.0121585	2.18944	0.391	0.059	1
Rab21	0.0122058	-1.09992	0.283	0.706	1
Ddx50	0.012228	-0.966865	0.283	0.765	1
Foxp1	0.0122411	1.34088	0.63	0.471	1
Cd164	0.0122702	1.33541	0.717	0.647	1
Tpgs2	0.0124126	-1.53333	0.13	0.471	1
Wdr48	0.0124126	-1.21562	0.13	0.471	1
Son	0.0124564	-0.765259	0.696	1	1
Apip	0.0125116	-1.33289	0.304	0.647	1
Dmap1	0.0125264	-1.50141	0.109	0.412	1
Ogt	0.0126902	1.60591	0.63	0.412	1
Rest	0.0127012	-0.890231	0.326	0.765	1
Ppp1r12a	0.012711	-1.33559	0.239	0.588	1
Ift43	0.0127433	-0.994395	0.261	0.706	1
Ktn1	0.0129489	-0.797235	0.565	0.941	1
Rdx	0.0130156	-0.707336	0.609	1	1
Commd7	0.0131783	-1.27977	0.13	0.471	1
Ctdsp1	0.0132767	2.77475	0.37	0.059	1
Btg1	0.0132784	-1.6588	0.522	0.706	1
Cited2	0.0132784	-1.59283	0.478	0.824	1
H2afv	0.0133354	-0.737625	0.783	1	1
Sat1	0.0133475	-1.44843	0.109	0.412	1
Tonsl	0.0133868	2.54142	0.413	0.118	1
Rpa3	0.0133868	2.51215	0.413	0.118	1
Ppp1r15b	0.013486	-1.82748	0.087	0.353	1
Crnkl1	0.013486	-1.80573	0.087	0.353	1
Fam174b	0.013486	-1.78028	0.087	0.353	1
Gm11808	0.0135844	2.19797	0.543	0.294	1
Mrpl16	0.0136852	-1.17684	0.217	0.588	1
Prkcsh	0.0136852	-1.14172	0.217	0.588	1
Ptgfrn	0.0136988	2.00557	0.435	0.118	1
BC005561	0.0136988	-1.2909	0.239	0.647	1
Rnf111	0.0138917	-1.00202	0.152	0.529	1
Coa6	0.0139257	-0.861323	0.239	0.706	1
AY036118	0.0140166	2.63982	0.37	0.059	1
Arpc5	0.0140726	-0.768603	0.261	0.706	1
Ndufb7	0.014115	0.391629	0.957	1	1
Mgp	0.0141556	0.818635	0.717	0.353	1
Impa2	0.0142158	-1.19243	0.109	0.412	1
Tmem176b	0.0143042	-0.674573	0.717	1	1
Tesc	0.0144259	-1.48751	0.152	0.471	1
Rad50	0.0144319	-1.95353	0.087	0.353	1
Eif4ebp2	0.0144319	-1.85268	0.087	0.353	1
Ruvbl1	0.0144319	-1.5643	0.087	0.353	1
Vezf1	0.0144636	1.64814	0.543	0.235	1
Tspan9	0.0144933	1.94991	0.478	0.176	1
Cap2	0.0146357	0.997334	0.87	0.882	1
Nfil3	0.0146361	-2.39557	0.13	0.412	1
Lclat1	0.0146514	1.50892	0.63	0.471	1
Cfap36	0.0146953	-1.59851	0.174	0.471	1
Gpx4	0.0147346	-0.285745	0.957	1	1
Cox7a2l	0.0147357	0.496978	1	1	1
Pde1a	0.0147754	2.24353	0.5	0.235	1
Dgkz	0.0147926	2.38833	0.37	0.059	1
Eea1	0.0147926	-1.54839	0.196	0.529	1
Mical3	0.014818	1.34667	0.674	0.529	1
Eif2s2	0.0151093	-0.686766	0.761	1	1
Trim24	0.0151336	-1.58883	0.109	0.412	1
Insig2	0.0151538	2.00158	0.435	0.118	1
Ilk	0.0151612	0.901473	0.761	0.588	1
Abhd8	0.0151854	-1.23853	0.217	0.588	1
Rhoc	0.0152758	-0.851368	0.609	0.941	1
Calm1	0.0152759	-0.754566	0.826	1	1
BC005537	0.0153671	1.23952	0.717	0.588	1
Fkbp1a	0.0153743	0.60977	0.935	1	1
Fdps	0.0154215	-2.07424	0.065	0.294	1
Sar1b	0.015433	-0.997256	0.609	0.824	1
1190007I07Rik	0.0154358	-1.68359	0.087	0.353	1
Spryd4	0.0154358	-1.52797	0.087	0.353	1
Snx18	0.0154358	-1.50558	0.087	0.353	1
Myl12a	0.0156663	0.755869	0.891	0.941	1
Mapk1	0.0158017	1.28239	0.652	0.529	1
Ncam1	0.0158289	1.36462	0.717	0.706	1
Usp50	0.0159311	2.0038	0.435	0.118	1
Ak2	0.0159885	-1.50407	0.239	0.529	1
Whsc1	0.0160218	3.15602	0.283	0	1
Rasl10a	0.0160218	3.07232	0.283	0	1
Fam73b	0.0160218	2.849	0.283	0	1
Mmp16	0.0160218	2.84519	0.283	0	1
Prps2	0.0160218	2.81397	0.283	0	1
Prosc	0.0160218	2.78656	0.283	0	1
Cacul1	0.0160218	2.70178	0.283	0	1
2310015A10Rik	0.0160218	2.69697	0.283	0	1
B630005N14Rik	0.0160218	2.68959	0.283	0	1
Rtfdc1	0.0160218	2.67953	0.283	0	1
Arhgef12	0.0160848	-1.13097	0.326	0.765	1
Purb	0.0161492	-0.778635	0.739	0.882	1
Ppp1r2	0.0162028	-0.840396	0.674	0.941	1
Dennd5a	0.0162123	1.48793	0.609	0.353	1
Sdc4	0.0163298	-0.99269	0.304	0.706	1
Rac1	0.0163729	0.867277	0.739	0.706	1
Efnb2	0.0164184	2.27679	0.413	0.118	1
Tia1	0.016425	1.58623	0.587	0.471	1
Vps72	0.0164261	-0.442784	0.152	0.529	1
Mgmt	0.0164591	-0.804569	0.196	0.529	1
Vps8	0.0165008	-1.48114	0.087	0.353	1
Clpb	0.0165087	-1.69517	0.13	0.412	1
Sugt1	0.0165951	-0.776758	0.435	0.941	1
Nedd8	0.0167275	-0.482801	0.913	1	1
4931406P16Rik	0.0167433	-0.894452	0.239	0.647	1
Nab1	0.0167433	-0.657053	0.239	0.647	1
Ccndbp1	0.0168287	-1.23381	0.217	0.588	1
Rfxank	0.0168495	1.63025	0.522	0.235	1
Snrnp27	0.0168864	1.00601	0.674	0.529	1
Tecrl	0.0169669	2.86578	0.348	0.059	1
Abi1	0.0169669	2.79394	0.348	0.059	1
Fdx1l	0.0169669	2.50658	0.348	0.059	1
Limd2	0.0169669	2.48978	0.348	0.059	1
Zbtb10	0.0169669	-1.1037	0.174	0.529	1
Atpaf1	0.0169692	-0.929703	0.239	0.706	1
Top1	0.0169716	-0.829772	0.739	0.941	1
Eif3i	0.0171132	-0.792631	0.609	0.882	1
Cdh2	0.0171458	-0.834854	0.391	0.765	1
Zbtb38	0.0171459	-0.976693	0.196	0.588	1
Psmd9	0.0171459	-0.941695	0.196	0.588	1
Psmb6	0.0171642	-0.524307	0.783	0.941	1
Apopt1	0.017388	-1.09193	0.261	0.647	1
Sec61g	0.0174588	0.523581	0.957	1	1
Stk24	0.0176297	-1.85836	0.087	0.353	1
Parp2	0.0176297	-1.56867	0.087	0.353	1
Dus1l	0.0176297	-1.41594	0.087	0.353	1
Bend5	0.0176297	-1.32056	0.087	0.353	1
Pttg1	0.0176297	-0.89337	0.087	0.353	1
Nol7	0.0176301	-0.889627	0.565	0.824	1
Fbxl5	0.017667	-0.638537	0.13	0.471	1
Ccnl2	0.017702	-0.741927	0.217	0.647	1
Stt3b	0.0178052	1.80401	0.522	0.294	1
Sdf2	0.0178052	-0.88562	0.348	0.765	1
Galk1	0.0178158	-1.50255	0.283	0.588	1
Laptm4b	0.0178283	1.90427	0.5	0.235	1
Cct7	0.0178389	-0.576058	0.391	0.882	1
Gstt1	0.0178462	-2.25889	0.065	0.294	1
Stx11	0.0178462	-2.11717	0.065	0.294	1
Prss35	0.0178462	-2.02409	0.065	0.294	1
Ebp	0.0178462	-1.46723	0.065	0.294	1
Papola	0.017859	0.950371	0.739	0.529	1
BC034090	0.0179034	2.40298	0.348	0.059	1
Commd4	0.0179034	-0.995916	0.174	0.529	1
Ddx17	0.0179931	1.11593	0.696	0.529	1
Capza1	0.0181292	1.14118	0.696	0.706	1
Ndrg4	0.0181292	1.02483	0.739	0.588	1
Tns1	0.0181789	0.770359	0.891	1	1
Bnip3l	0.0181837	-0.640416	0.674	1	1
Tex30	0.0182072	-1.32092	0.109	0.412	1
Sap30	0.0184147	-1.20624	0.304	0.647	1
Trmt5	0.0184644	-2.73576	0.043	0.235	1
Pfkl	0.0184773	-1.26731	0.261	0.588	1
Stard7	0.0185125	1.4185	0.587	0.412	1
Sf3b3	0.0185885	-1.70255	0.13	0.412	1
Ddit3	0.018626	-0.998616	0.217	0.588	1
Nubp2	0.0188258	-1.26235	0.087	0.353	1
Ubxn2a	0.0190053	-1.20505	0.196	0.588	1
Dcun1d5	0.0190311	-0.72992	0.587	0.941	1
Imp3	0.01906	-1.03736	0.413	0.824	1
Ddx21	0.0191388	-1.22813	0.152	0.471	1
Cd151	0.0191786	-0.822796	0.37	0.824	1
Nxt1	0.0191793	-1.60141	0.065	0.294	1
Ttc32	0.0191793	-1.41277	0.065	0.294	1
Fastk	0.0191922	1.31718	0.63	0.588	1
Bod1	0.0193403	-0.931733	0.457	0.765	1
Mbd2	0.0193579	-1.35544	0.174	0.471	1
Ptpn1	0.0193579	-0.771411	0.152	0.529	1
Ctnnd1	0.019465	1.22139	0.652	0.412	1
Nfe2l1	0.019483	-0.732114	0.391	0.882	1
Nynrin	0.0195861	2.17695	0.391	0.118	1
Mpc1	0.0197546	-0.60933	0.891	1	1
Aldoa	0.0197841	0.481841	1	1	1
Bcl11a	0.0199129	2.65196	0.348	0.059	1
Enah	0.0199499	0.795573	0.891	0.706	1
Uck2	0.0200922	-1.36853	0.087	0.353	1
Katna1	0.0200922	-1.36501	0.087	0.353	1
Ppp2r3c	0.0200922	-1.2093	0.087	0.353	1
Hnrnpa2b1	0.0201816	0.563582	0.935	0.941	1
Nip7	0.0202285	-1.26026	0.152	0.471	1
Wtap	0.0202365	1.80635	0.5	0.294	1
Abra	0.020293	-1.19416	0.196	0.529	1
Cavin2	0.0203671	-4.8199	0	0.118	1
Irx5	0.0203671	-3.5834	0	0.118	1
Dnajc5b	0.0203671	-3.54441	0	0.118	1
Cdkn3	0.0203671	-3.53647	0	0.118	1
Scn10a	0.0203671	-3.48155	0	0.118	1
Ripor1	0.0203671	-3.45543	0	0.118	1
Cxcl10	0.0203671	-3.33441	0	0.118	1
Gm20234	0.0203671	-3.32932	0	0.118	1
Rab10os	0.0203671	-3.32311	0	0.118	1
Hes7	0.0203671	-3.32232	0	0.118	1
Klf5	0.0203671	-3.25747	0	0.118	1
C920021L13Rik	0.0203671	-3.21685	0	0.118	1
Btg3	0.0203671	-3.20223	0	0.118	1
Ciart	0.0203671	-3.197	0	0.118	1
Tmem79	0.0203671	-3.15177	0	0.118	1
Dapk2	0.0203671	-3.13452	0	0.118	1
Gm15261	0.0203671	-3.13151	0	0.118	1
Spink4	0.0203671	-3.12919	0	0.118	1
Jdp2	0.0203671	-3.11275	0	0.118	1
Zfp799	0.0203671	-3.08494	0	0.118	1
Rab7b	0.0203671	-3.08456	0	0.118	1
Rims4	0.0203671	-3.06731	0	0.118	1
Pgap3	0.0203671	-3.0654	0	0.118	1
Gm4577	0.0203671	-3.06502	0	0.118	1
Gm47439	0.0203671	-3.06457	0	0.118	1
Trmt61a	0.0203671	-3.05927	0	0.118	1
Cdh16	0.0203671	-3.05844	0	0.118	1
Slc27a3	0.0203671	-3.04086	0	0.118	1
Abcb1b	0.0203671	-3.03854	0	0.118	1
Myd88	0.0203671	-3.01647	0	0.118	1
Rab43	0.0203671	-3.01608	0	0.118	1
Tti2	0.0203671	-3.01608	0	0.118	1
Pawr	0.0203671	-3.01013	0	0.118	1
Kat14	0.0203671	-3.00844	0	0.118	1
Atp6ap1l	0.0203671	-3.00292	0	0.118	1
Rdh10	0.0203671	-3.00273	0	0.118	1
Mindy4b-ps	0.0203671	-3.00246	0	0.118	1
Togaram1	0.0203671	-2.98446	0	0.118	1
Grk2	0.0203671	-2.98176	0	0.118	1
Retreg3	0.0203671	-2.97526	0	0.118	1
Gm26794	0.0203671	-2.973	0	0.118	1
Parp9	0.0203671	-2.9723	0	0.118	1
Ino80dos	0.0203671	-2.96617	0	0.118	1
Slc9a7	0.0203671	-2.96617	0	0.118	1
Prickle2	0.0203671	-2.96617	0	0.118	1
Slc1a2	0.0203671	-2.925	0	0.118	1
Gm16863	0.0203671	-2.91294	0	0.118	1
AC167229.1	0.0203671	-2.90685	0	0.118	1
Khnyn	0.0203671	-2.90643	0	0.118	1
Tubg2	0.0203671	-2.90643	0	0.118	1
Rassf10	0.0203671	-2.89167	0	0.118	1
Rwdd2a	0.0203671	-2.89167	0	0.118	1
Sqor	0.0203671	-2.8894	0	0.118	1
Sbno2	0.0203671	-2.88334	0	0.118	1
Etohd2	0.0203671	-2.88247	0	0.118	1
Gm24474	0.0203671	-2.87778	0	0.118	1
Crabp1	0.0203671	-2.87427	0	0.118	1
2310068J16Rik	0.0203671	-2.87243	0	0.118	1
L3hypdh	0.0203671	-2.86586	0	0.118	1
Cad	0.0203671	-2.86235	0	0.118	1
Fam91a1	0.0203671	-2.85997	0	0.118	1
Zfat	0.0203671	-2.85902	0	0.118	1
Srgap3	0.0203671	-2.84979	0	0.118	1
Tfdp1	0.0203671	-2.84979	0	0.118	1
Tbc1d10a	0.0203671	-2.84979	0	0.118	1
Tlr2	0.0203671	-2.84936	0	0.118	1
Ddx58	0.0203671	-2.84309	0	0.118	1
4930426D05Rik	0.0203671	-2.84309	0	0.118	1
Trib3	0.0203671	-2.84213	0	0.118	1
Pex12	0.0203671	-2.84123	0	0.118	1
Taco1	0.0203671	-2.83881	0	0.118	1
Hip1r	0.0203671	-2.8377	0	0.118	1
F3	0.0203671	-2.82192	0	0.118	1
Zfp983	0.0203671	-2.82192	0	0.118	1
Itga7	0.0203671	-2.81953	0	0.118	1
Alg10b	0.0203671	-2.81953	0	0.118	1
Miga2	0.0203671	-2.81938	0	0.118	1
Pcp4	0.0203671	-2.81318	0	0.118	1
Pot1b	0.0203671	-2.81078	0	0.118	1
Large1	0.0203671	-2.80685	0	0.118	1
Mindy1	0.0203671	-2.8034	0	0.118	1
Gm19531	0.0203671	-2.80202	0	0.118	1
Wipf3	0.0203671	-2.79789	0	0.118	1
Garem1	0.0203671	-2.79777	0	0.118	1
Slc35e4	0.0203671	-2.79455	0	0.118	1
Cryzl2	0.0203671	-2.78177	0	0.118	1
Proscos	0.0203671	-2.77778	0	0.118	1
Selenoo	0.0203671	-2.77778	0	0.118	1
Kcnj11	0.0203671	-2.77688	0	0.118	1
Zbed5	0.0203671	-2.77213	0	0.118	1
Gm15627	0.0203671	-2.77213	0	0.118	1
Plcd1	0.0203671	-2.77213	0	0.118	1
Gpd1	0.0203671	-2.77213	0	0.118	1
Ahnak2	0.0203671	-2.77173	0	0.118	1
Ccdc94	0.0203671	-2.77173	0	0.118	1
Cbln1	0.0203671	-2.77167	0	0.118	1
Sox6os	0.0203671	-2.76888	0	0.118	1
Gm19325	0.0203671	-2.76888	0	0.118	1
AC162693.1	0.0203671	-2.76888	0	0.118	1
Lrrc8b	0.0203671	-2.76842	0	0.118	1
Mex3b	0.0203671	-2.76842	0	0.118	1
Gm48882	0.0203671	-2.76842	0	0.118	1
Hist1h2bk	0.0203671	-2.76842	0	0.118	1
AC153140.2	0.0203671	-2.76842	0	0.118	1
Kmt5c	0.0203671	-2.76462	0	0.118	1
Tvp23bos	0.0203671	-2.76462	0	0.118	1
Abca3	0.0203671	-2.76462	0	0.118	1
Zfp992	0.0203671	-2.76135	0	0.118	1
Pde7b	0.0203671	-2.76135	0	0.118	1
Taf4	0.0203671	-2.75606	0	0.118	1
Gm45163	0.0203671	-2.75606	0	0.118	1
Cdh24	0.0203671	-2.75606	0	0.118	1
Intu	0.0203671	-2.7556	0	0.118	1
Ric3	0.0203671	-2.7556	0	0.118	1
Rdh5	0.0203671	-2.7556	0	0.118	1
Mns1	0.0203671	-2.7556	0	0.118	1
Mstn	0.0203671	-2.75255	0	0.118	1
Sprtn	0.0203671	-2.75222	0	0.118	1
Zufsp	0.0203671	-2.74846	0	0.118	1
Kif27	0.0203671	-2.74846	0	0.118	1
Zfp955a	0.0203671	-2.74846	0	0.118	1
Tsga10ip	0.0203671	-2.74846	0	0.118	1
Gm49085	0.0203671	-2.74466	0	0.118	1
Riox2	0.0203671	-2.74018	0	0.118	1
1500035N22Rik	0.0203671	-2.73686	0	0.118	1
Zfp971	0.0203671	-2.73583	0	0.118	1
Aqp4	0.0203671	-2.73583	0	0.118	1
Bud23	0.0203671	-2.7227	0	0.118	1
Arv1	0.0203671	-2.7227	0	0.118	1
Tmod3	0.0203671	-2.7227	0	0.118	1
C920006O11Rik	0.0203671	-2.7227	0	0.118	1
AC129328.1	0.0203671	-2.7227	0	0.118	1
Zfp995	0.0203671	-2.7227	0	0.118	1
Gins1	0.0203671	-2.71943	0	0.118	1
Madcam1	0.0203671	-2.71718	0	0.118	1
Phf7	0.0203671	-2.71718	0	0.118	1
Taf4b	0.0203671	-2.7138	0	0.118	1
Fcho1	0.0203671	-2.70895	0	0.118	1
E2f3	0.0203671	-2.70895	0	0.118	1
Fam107b	0.0203671	-2.70048	0	0.118	1
Gm20075	0.0203671	-2.70048	0	0.118	1
Map7d3	0.0203671	-2.6995	0	0.118	1
Gm48551	0.0203671	-2.6995	0	0.118	1
Ptpdc1	0.0203671	-2.6995	0	0.118	1
Nr4a3	0.0203671	-2.69603	0	0.118	1
Gm7467	0.0203671	-2.6926	0	0.118	1
Tmem69	0.0203671	-2.67908	0	0.118	1
A230057D06Rik	0.0203671	-2.67908	0	0.118	1
AC165271.1	0.0203671	-2.67908	0	0.118	1
Slc9a9	0.0203671	-2.67862	0	0.118	1
Trim45	0.0203671	-2.67555	0	0.118	1
Nsg1	0.0203671	-2.67555	0	0.118	1
Exoc6	0.0203671	-2.67555	0	0.118	1
Tgfbr3	0.0203671	-2.66546	0	0.118	1
Irx1	0.0203671	-2.66196	0	0.118	1
Kif5c	0.0203671	-2.66146	0	0.118	1
G6pc3	0.0203671	-2.66146	0	0.118	1
Pcna-ps2	0.0203671	-2.66146	0	0.118	1
Tcim	0.0203671	-2.65168	0	0.118	1
Flt4	0.0203671	-2.64461	0	0.118	1
Anxa3	0.0203671	-2.63557	0	0.118	1
Mrpl53	0.0203671	-2.63557	0	0.118	1
Bbs2	0.0203671	-2.63557	0	0.118	1
D830030K20Rik	0.0203671	-2.63557	0	0.118	1
2810457G06Rik	0.0203671	-2.63557	0	0.118	1
Adamts6	0.0203671	-2.63557	0	0.118	1
Clec11a	0.0203671	-2.62951	0	0.118	1
Zfp990	0.0203671	-2.61953	0	0.118	1
Zfhx3	0.0203671	-2.61948	0	0.118	1
D2hgdh	0.0203671	-2.5982	0	0.118	1
Atp23	0.0203671	-2.5982	0	0.118	1
Htra4	0.0203671	-2.5982	0	0.118	1
Amacr	0.0203671	-2.5982	0	0.118	1
Birc5	0.0203671	-2.58822	0	0.118	1
Gm45051	0.0203671	-2.57794	0	0.118	1
Syce2	0.0203671	-2.54959	0	0.118	1
AC130815.2	0.0203671	-2.54959	0	0.118	1
Fosl1	0.0203671	-2.54959	0	0.118	1
Tgfb1	0.0203671	-2.53863	0	0.118	1
B430010I23Rik	0.0203671	-2.53863	0	0.118	1
Zfp994	0.0203671	-2.53863	0	0.118	1
Gpn2	0.0203671	-2.51971	0	0.118	1
Gm39469	0.0203671	-2.51971	0	0.118	1
Sass6	0.0203671	-2.51606	0	0.118	1
Nat8f1	0.0203671	-2.51606	0	0.118	1
Gm10643	0.0203671	-2.51606	0	0.118	1
Pwwp2b	0.0203671	-2.51218	0	0.118	1
Wnk4	0.0203671	-2.51218	0	0.118	1
Hist1h4i	0.0203671	-2.51218	0	0.118	1
Gpat3	0.0203671	-2.49685	0	0.118	1
Tmem238	0.0203671	-2.49685	0	0.118	1
Hist1h2be	0.0203671	-2.49685	0	0.118	1
Mfsd14b	0.0203671	-2.49685	0	0.118	1
Zfp974	0.0203671	-2.49461	0	0.118	1
Dgka	0.0203671	-2.49461	0	0.118	1
Plekhg3	0.0203671	-2.49461	0	0.118	1
1810021B22Rik	0.0203671	-2.49461	0	0.118	1
Sergef	0.0203671	-2.49067	0	0.118	1
Stat5a	0.0203671	-2.49067	0	0.118	1
Togaram2	0.0203671	-2.49067	0	0.118	1
9430037G07Rik	0.0203671	-2.4751	0	0.118	1
2610037D02Rik	0.0203671	-2.4751	0	0.118	1
Dynlt1a	0.0203671	-2.4751	0	0.118	1
Dyx1c1	0.0203671	-2.46455	0	0.118	1
Igtp	0.0203671	-2.46455	0	0.118	1
Ncapg2	0.0203671	-2.46455	0	0.118	1
Pcdhga7	0.0203671	-2.46455	0	0.118	1
Pfkfb3	0.0203671	-2.46053	0	0.118	1
Ints13	0.0203671	-2.46053	0	0.118	1
Arntl	0.0203671	-2.46053	0	0.118	1
Prss27	0.0203671	-2.46053	0	0.118	1
Carmil1	0.0203671	-2.45335	0	0.118	1
8030462N17Rik	0.0203671	-2.45335	0	0.118	1
Gm13375	0.0203671	-2.4493	0	0.118	1
Rasgef1a	0.0203671	-2.4493	0	0.118	1
Dhcr7	0.0203671	-2.4493	0	0.118	1
Ccdc138	0.0203671	-2.4493	0	0.118	1
Sync	0.0203671	-2.44463	0	0.118	1
Brip1	0.0203671	-2.44463	0	0.118	1
Acss1	0.0203671	-2.43328	0	0.118	1
Pla2g4e	0.0203671	-2.35794	0	0.118	1
Sema3a	0.0203671	-2.35794	0	0.118	1
2310040G07Rik	0.0203671	-2.35794	0	0.118	1
Ddx51	0.0203671	-2.35794	0	0.118	1
Abcc9	0.0203671	-2.35794	0	0.118	1
Gm31251	0.0203671	-2.35794	0	0.118	1
Cep126	0.0203671	-2.35794	0	0.118	1
Pde1b	0.0203671	-2.35794	0	0.118	1
Bicral	0.0203671	-2.35794	0	0.118	1
Stn1	0.0203671	-2.35794	0	0.118	1
Vti1a	0.0203671	-2.35794	0	0.118	1
Thbs4	0.0203671	-2.34087	0	0.118	1
Slc15a2	0.0203671	-2.34087	0	0.118	1
E130307A14Rik	0.0203671	-2.33648	0	0.118	1
Hist1h2ac	0.0203671	-2.33648	0	0.118	1
Brix1	0.020432	-1.34575	0.174	0.471	1
Slc24a2	0.0204677	1.63121	0.5	0.235	1
Dhx29	0.0205483	-0.856057	0.109	0.412	1
Sept6	0.0205891	2.32066	0.391	0.118	1
Coasy	0.0205986	-1.96276	0.065	0.294	1
Arhgap26	0.0205986	-1.92655	0.065	0.294	1
Mpp1	0.0205986	-1.92152	0.065	0.294	1
Dph5	0.0205986	-1.86588	0.065	0.294	1
Fam114a1	0.0205986	-1.80587	0.065	0.294	1
Mipol1	0.0205986	-1.67625	0.065	0.294	1
Zfp407	0.0205986	-1.65956	0.065	0.294	1
Cln5	0.0205986	-1.65909	0.065	0.294	1
Ank3	0.0206097	0.879569	0.804	0.647	1
Cbr1	0.0209895	-1.0998	0.174	0.529	1
Atp13a3	0.0209895	-0.945288	0.174	0.529	1
Afap1l1	0.0209895	-0.926547	0.174	0.529	1
Uri1	0.0210387	-0.929658	0.196	0.588	1
Polr1d	0.0210736	-0.661886	0.63	1	1
Prkaca	0.0211343	1.02482	0.696	0.647	1
Sertad2	0.0211709	-0.86356	0.326	0.765	1
Ndufs3	0.0212882	-0.486646	0.652	1	1
Arhgap1	0.021325	1.60619	0.522	0.294	1
Bhlhe40	0.0213654	-1.38191	0.196	0.529	1
Actb	0.0213919	1.06165	0.913	0.824	1
Mad2l1bp	0.0214323	-1.52158	0.087	0.353	1
Chmp7	0.0214323	-1.37967	0.087	0.353	1
Ppp1r10	0.0214323	-1.24476	0.087	0.353	1
Exosc9	0.0214323	-1.08916	0.087	0.353	1
Eid1	0.0214638	-0.427885	0.913	1	1
Snx17	0.0215639	-1.44251	0.261	0.529	1
Exosc4	0.0216845	-0.96615	0.283	0.647	1
Kcnmb4	0.0217121	-2.66105	0.043	0.235	1
Col3a1	0.0218143	3.02126	0.261	0	1
Aqp1	0.0218143	2.97677	0.261	0	1
1700040L02Rik	0.0218143	2.94028	0.261	0	1
Foxp2	0.0218143	2.82942	0.261	0	1
Atn1.1	0.0218143	2.72182	0.261	0	1
Net1	0.0218143	2.63276	0.261	0	1
Cpt1a	0.0218143	2.59811	0.261	0	1
Rps18-ps3	0.0218143	2.57643	0.261	0	1
Gm9844	0.0218143	2.5226	0.261	0	1
N6amt2	0.0218143	2.37848	0.261	0	1
Prickle1	0.0218143	-1.21649	0.109	0.412	1
Gpc4	0.0218143	-0.953566	0.109	0.412	1
B230369F24Rik	0.0221086	-1.8856	0.065	0.294	1
Tmem86a	0.0221086	-1.8267	0.065	0.294	1
Cbx4	0.0221086	-1.57925	0.065	0.294	1
Aimp2	0.0221377	-1.70878	0.13	0.412	1
Timp1	0.0221377	-1.37406	0.13	0.412	1
Rwdd1	0.022167	-0.819124	0.63	0.941	1
Nemf	0.0221917	-1.21551	0.304	0.647	1
Mrps6	0.0221917	-1.10945	0.304	0.647	1
Ube3a	0.0223672	0.73758	0.957	0.941	1
Rps26	0.0223736	-0.348826	0.978	1	1
Hacd4	0.0224112	1.93188	0.5	0.235	1
Plppr5	0.022422	-0.606785	0.239	0.647	1
Sh3bgrl3	0.0224868	-1.14573	0.196	0.529	1
Pabpc1	0.0225637	0.749308	0.848	0.824	1
Adcy5	0.0227233	1.19244	0.674	0.471	1
Pgm2	0.0227237	1.15656	0.696	0.471	1
1500009L16Rik	0.0227933	-0.951667	0.37	0.706	1
Gm10762	0.0228497	-1.45158	0.087	0.353	1
Arid5a	0.0228497	-1.21131	0.087	0.353	1
Snx13	0.0228497	-1.14409	0.087	0.353	1
Gsk3a	0.0228497	-1.13897	0.087	0.353	1
Azin1	0.0230151	1.12194	0.761	0.824	1
Nid2	0.0230702	1.6422	0.609	0.529	1
Siah2	0.0231477	-0.782926	0.109	0.412	1
Mgrn1	0.0231583	0.952075	0.696	0.529	1
Ldha	0.0232072	-0.373683	0.848	1	1
Khsrp	0.0232959	1.95141	0.348	0.059	1
Ssbp4	0.0232959	-1.08313	0.174	0.529	1
Pfn1	0.0233	0.632593	1	0.941	1
Mitf	0.0233733	1.56863	0.543	0.294	1
Add1	0.0233733	1.35745	0.543	0.294	1
Gsg1	0.0234451	-1.18613	0.13	0.412	1
Eid2	0.0234451	-1.14023	0.13	0.412	1
Macrod1	0.0235149	-2.21375	0.043	0.235	1
Ttc8	0.0235149	-2.14322	0.043	0.235	1
1700037C18Rik	0.0235149	-2.07797	0.043	0.235	1
Cnksr3	0.0235149	-1.93711	0.043	0.235	1
Ccnb2	0.0235149	-1.59672	0.043	0.235	1
Polr2d	0.0235157	-0.567222	0.239	0.647	1
Ghitm	0.0236417	0.731165	0.804	0.765	1
Mcam	0.0236512	1.64554	0.478	0.235	1
Mrpl22	0.0236512	-0.960666	0.304	0.706	1
Syap1	0.0237141	-1.78521	0.065	0.294	1
[truncated: 10,390 more rows]

## Sheet: E-cAVN vs P-AVN
Gene	p_val	avg_log2FC	pct.1	pct.2	p_val_adj
Atp5o.1	2.15181e-16	-9.69875	0	1	6.98349e-12
Elob	2.15181e-16	-9.03852	0	1	6.98349e-12
Sem1	2.15181e-16	-8.45674	0	1	6.98349e-12
Rack1	2.15181e-16	-8.4101	0	1	6.98349e-12
Selenom	2.15181e-16	-8.02569	0	1	6.98349e-12
Selenow	1.3216e-15	-7.95893	0	0.962	4.28911e-11
Rtraf	2.15181e-16	-7.49364	0	1	6.98349e-12
Fmc1	2.15181e-16	-7.41876	0	1	6.98349e-12
Retreg1	4.33375e-14	-7.41715	0	0.885	1.40648e-09
Bex3	2.15181e-16	-7.38882	0	1	6.98349e-12
Gm45716	7.74344e-15	-7.35934	0	0.923	2.51306e-10
Selenok	2.15181e-16	-7.1742	0	1	6.98349e-12
Gm31659	2.31972e-13	-7.17018	0	0.846	7.52842e-09
Cops9	2.15181e-16	-7.02363	0	1	6.98349e-12
Eloc	7.74344e-15	-7.01874	0	0.923	2.51306e-10
Tceal9	7.74344e-15	-6.95086	0	0.923	2.51306e-10
Rex1bd	1.3216e-15	-6.94068	0	0.962	4.28911e-11
Jpt1	4.33375e-14	-6.93228	0	0.885	1.40648e-09
Selenof	7.74344e-15	-6.90325	0	0.923	2.51306e-10
Ss18l2	1.3216e-15	-6.88623	0	0.962	4.28911e-11
Gm34030	4.33375e-14	-6.85568	0	0.885	1.40648e-09
5430431A17Rik	5.84333e-12	-6.72748	0	0.769	1.8964e-07
Afdn	1.18902e-12	-6.47828	0	0.808	3.85885e-08
Snu13	7.74344e-15	-6.31126	0	0.923	2.51306e-10
Atp5o	6.15561e-13	9.0299	1	0	1.99774e-08
Rpl10	7.06503e-13	7.99636	1	0.038	2.29289e-08
Tceb2	6.15561e-13	7.69812	1	0	1.99774e-08
Mcrip2	2.75664e-11	-6.26895	0	0.731	8.94639e-07
Sepw1	6.15561e-13	7.67566	1	0	1.99774e-08
Mcrip1	2.31972e-13	-6.25906	0	0.846	7.52842e-09
Gnb2l1	4.16631e-12	7.49721	0.957	0	1.35213e-07
Shfm1	1.62017e-12	7.39512	0.979	0	5.25811e-08
Gm10709	4.16631e-12	7.00228	0.957	0	1.35213e-07
Ngfrap1	1.04719e-11	6.89589	0.936	0	3.39855e-07
2700060E02Rik	1.62017e-12	6.82345	0.979	0	5.25811e-08
Wbp5	1.62017e-12	6.76452	0.979	0	5.25811e-08
Myeov2	1.04719e-11	6.51583	0.936	0	3.39855e-07
Nipsnap2	2.75664e-11	-6.03591	0	0.731	8.94639e-07
Hn1	2.57378e-11	6.47208	0.915	0	8.35295e-07
Gm8730	1.61381e-08	6.3385	0.745	0	0.000523744
Ndufaf8	4.33375e-14	-6.02803	0	0.885	1.40648e-09
1110001J03Rik	2.57378e-11	6.30912	0.915	0	8.35295e-07
Cebpd	9.29495e-09	-6.01687	0	0.577	0.000301658
Mrpl58	2.75664e-11	-5.7973	0	0.731	8.94639e-07
Ptrf	3.35543e-10	6.07448	0.851	0	1.08897e-05
RP23-455C13.7	1.45626e-10	6.06383	0.872	0	4.72615e-06
Tceb1	3.35543e-10	6.01219	0.851	0	1.08897e-05
Selenoh	5.84333e-12	-5.78932	0	0.769	1.8964e-07
Zak	7.72981e-09	5.81267	0.766	0	0.000250863
Gbas	2.57378e-11	5.80968	0.915	0	8.35295e-07
Prelid3b	5.84333e-12	-5.73653	0	0.769	1.8964e-07
Selenos	2.75664e-11	-5.64754	0	0.731	8.94639e-07
Naxe	2.29235e-09	-5.53703	0	0.615	7.43959e-05
Selk	3.35543e-10	5.73272	0.851	0	1.08897e-05
Trir	2.75664e-11	-5.50376	0	0.731	8.94639e-07
Gucy1a3	1.61381e-08	5.50909	0.745	0	0.000523744
Rps27	1.62571e-12	5.4797	1	0.423	5.27608e-08
Sep15	6.66004e-08	5.46807	0.702	0	0.00216145
Deb1	3.30792e-08	5.41274	0.723	0	0.00107355
Igf2	2.83281e-09	5.40691	0.809	0.038	9.19359e-05
Selt	7.72981e-09	5.37166	0.766	0	0.000250863
Selm	6.66004e-08	5.34265	0.702	0	0.00216145
1810043H04Rik	3.30792e-08	5.07365	0.723	0	0.00107355
2810428I15Rik	1.31767e-07	5.00621	0.681	0	0.00427638
Dmac1	5.45337e-10	-5.48342	0	0.654	1.76984e-05
Cenpx	5.45337e-10	-5.47502	0	0.654	1.76984e-05
Smim26	9.29495e-09	-5.41812	0	0.577	0.000301658
Lmntd1	4.14604e-10	-5.38669	0.021	0.692	1.34556e-05
Vps28	5.45337e-10	-5.37792	0	0.654	1.76984e-05
Cavin1	2.29235e-09	-5.29077	0	0.615	7.43959e-05
Gltscr2	2.56295e-07	4.99637	0.66	0	0.00831781
Fam195b	3.63226e-09	4.99083	0.787	0	0.000117881
2900097C17Rik	2.29235e-09	-5.25053	0	0.615	7.43959e-05
Cxx1a	4.90306e-07	4.98375	0.638	0	0.0159124
Rtl8a	1.37839e-07	-5.11453	0	0.5	0.00447342
Hpf1	2.29235e-09	-5.09477	0	0.615	7.43959e-05
Nbdy	9.29495e-09	-5.06838	0	0.577	0.000301658
Rpl13a	1.8585e-12	4.91883	1	0.577	6.03157e-08
Rtf2	1.37839e-07	-5.05152	0	0.5	0.00447342
Rps12	1.38139e-12	4.90288	1	0.308	4.48317e-08
Pam16	1.31767e-07	4.90118	0.681	0	0.00427638
Nop53	3.63996e-08	-5.02987	0	0.538	0.00118131
Fam195a	9.22945e-07	4.76183	0.617	0	0.0299532
Selenot	5.45337e-10	-5.02877	0	0.654	1.76984e-05
Tonsl	6.66004e-08	4.74933	0.702	0	0.00216145
Rpl27	6.36354e-10	4.71724	0.872	0.115	2.06522e-05
Stra13	9.22945e-07	4.67423	0.617	0	0.0299532
Mosmo	2.29235e-09	-4.96188	0	0.615	7.43959e-05
Erbin	3.63996e-08	-4.91692	0	0.538	0.00118131
Gm561	4.90306e-07	4.6174	0.638	0	0.0159124
Tmem261	9.22717e-07	4.60203	0.617	0	0.0299458
2210013O21Rik	4.90306e-07	4.50706	0.638	0	0.0159124
Sept2	1.03976e-07	4.37214	0.723	0.038	0.00337445
Map3k20	3.63996e-08	-4.90414	0	0.538	0.00118131
Rxfp1	4.74621e-09	4.3342	0.83	0.115	0.000154034
Nr2f2	1.29047e-07	4.18889	0.723	0.077	0.00418811
Dyrk2	1.55868e-07	-4.79094	0.021	0.538	0.00505856
Mindy2	1.37839e-07	-4.68493	0	0.5	0.00447342
Ptpa	1.37839e-07	-4.67817	0	0.5	0.00447342
Gm17018	3.63996e-08	-4.66963	0	0.538	0.00118131
Shisa2	8.42235e-08	3.98647	0.766	0.115	0.00273339
Gnb5	1.88687e-10	-4.58172	0.021	0.731	6.12365e-06
Klf2	8.64158e-10	-4.22253	0.128	0.808	2.80454e-05
Cebpb	1.59526e-07	-4.18916	0.043	0.577	0.00517725
Btf3l4	2.40372e-08	3.88562	0.787	0.115	0.000780104
Gadd45b	2.69338e-12	-4.15935	0.426	1	8.74109e-08
Ppp1r3c	4.88089e-09	3.80132	0.851	0.115	0.000158404
Klf4	2.24832e-09	-4.11818	0.085	0.769	7.29669e-05
Myl3	1.476e-10	-4.07063	0.511	1	4.7902e-06
Myl2	5.87786e-11	-4.01853	0.532	1	1.9076e-06
Pgk1	6.37013e-13	-3.77188	0.319	1	2.06736e-08
Arid5b	1.21279e-10	-3.77182	0.234	0.885	3.93598e-06
Brd1	9.68154e-10	-3.63149	0.106	0.808	3.14205e-05
Ifrd1	5.17053e-12	-3.47235	0.255	0.962	1.67804e-07
Gem	1.48816e-08	-3.29666	0.085	0.731	0.000482966
Rspo3	1.55331e-09	-3.27929	0.277	0.962	5.04111e-05
Nfkbia	1.15863e-08	-3.25197	0.383	0.885	0.000376023
Bik	3.67941e-09	-3.0493	0.149	0.846	0.000119412
Hopx	8.69577e-08	-2.98177	0.511	0.885	0.00282213
Cav1	1.51201e-11	3.7641	1	0.269	4.90709e-07
Rps18	5.34062e-12	3.6386	1	0.385	1.73324e-07
Cidea	3.62394e-07	-2.92817	0.191	0.731	0.0117611
Fosb	6.22058e-08	-2.87222	0.106	0.769	0.00201883
Rpl36al	1.69456e-12	3.61938	1	0.462	5.49952e-08
Rps2	5.58812e-12	3.48805	1	0.423	1.81357e-07
Gapdh	2.0251e-12	3.36468	1	0.962	6.57227e-08
Lmod2	7.55501e-10	-2.83187	0.617	0.962	2.4519e-05
Hba-a1	1.21999e-09	2.92658	0.915	0.077	3.95935e-05
Rpl9	2.19932e-12	2.88997	1	0.962	7.13767e-08
Tnfrsf12a	3.95234e-07	-2.80144	0.34	0.808	0.0128269
Pim1	1.42092e-07	-2.78055	0.213	0.769	0.00461145
Mmd	3.77852e-09	2.8785	0.915	0.346	0.000122628
Rpl21	3.48545e-12	2.7954	1	0.692	1.13117e-07
Cox17	1.60175e-10	2.775	0.979	0.346	5.19833e-06
Rab20	4.23719e-09	-2.74211	0.234	0.885	0.000137514
Ier3	8.57967e-08	-2.61221	0.574	0.885	0.00278445
Sln	1.27499e-10	2.72327	0.979	0.346	4.13787e-06
Tuba1b	1.30344e-09	2.48181	0.957	0.615	4.23017e-05
Sertad1	1.67829e-08	-2.55768	0.277	0.923	0.000544673
Junb	2.5951e-09	-2.50767	0.489	0.962	8.42214e-05
mt-Nd6	2.36353e-07	-2.49114	0.149	0.769	0.00767059
Fabp3	9.49722e-12	-2.47378	0.957	1	3.08223e-07
Gm10076	3.91474e-07	2.43083	0.83	0.385	0.0127049
Slc8a1	5.45163e-07	-2.36883	0.234	0.808	0.0176927
Tgm2	7.64658e-07	2.34938	0.851	0.308	0.0248162
Rpl15	2.02195e-12	-2.33892	0.936	1	6.56205e-08
Jun	7.0613e-08	-2.31027	0.532	0.962	0.00229167
Kcng2	2.33067e-10	-2.27294	0.574	1	7.56396e-06
Hbb-bs	3.53563e-09	2.25559	0.936	0.231	0.000114745
Vsnl1	2.64073e-07	2.20257	0.915	0.346	0.00857024
Ppp1r12a	5.29998e-07	-2.26534	0.277	0.846	0.0172006
Gm42418	1.27276e-07	-2.2219	0.809	0.962	0.00413061
Rpl7a	4.90691e-11	2.19534	1	0.769	1.59249e-06
Id2	3.31527e-07	2.16859	0.979	0.808	0.0107594
Hspb7	1.24475e-10	2.13056	1	0.923	4.03972e-06
Gpx3	2.6831e-09	2.12126	1	0.962	8.70775e-05
Tbx20	1.03552e-08	2.09467	0.979	0.692	0.000336068
Sgcg	3.25456e-07	-2.17129	0.298	0.885	0.0105623
Mcl1	3.57179e-08	-2.12282	0.404	0.923	0.00115919
Pln	2.0013e-09	-2.06639	0.745	1	6.495e-05
Filip1	5.60667e-07	-1.9078	0.489	0.923	0.0181959
Malat1	4.59568e-11	-1.88081	1	1	1.49148e-06
Ubb	3.31623e-12	-1.7143	1	1	1.07625e-07
Cops4	1.19692e-06	-1.69095	0.447	0.923	0.038845
Scd2	2.87939e-07	2.04036	0.894	0.615	0.00934478
Arhgap31	4.84491e-08	1.86568	0.957	0.808	0.00157237
Jund	1.55281e-08	-1.66875	0.809	1	0.00050395
Pdgfa	6.69046e-07	-1.62425	0.596	0.962	0.0217132
Rps29	2.0251e-12	1.76548	1	1	6.57227e-08
Tbx5	4.86621e-07	1.76216	0.872	0.538	0.0157928
Bex4	7.28589e-07	1.74941	0.872	0.692	0.0236456
Acadl	1.51988e-09	-1.55796	0.936	1	4.93262e-05
Ldb3	3.05478e-10	1.73948	1	0.846	9.914e-06
Grb10	1.21657e-07	1.73864	0.936	0.808	0.00394827
mt-Nd4l	1.22747e-09	-1.55176	1	1	3.98363e-05
Ppp1r14c	9.17219e-11	-1.49833	0.936	1	2.97674e-06
Mpc2	3.52765e-08	-1.45857	0.915	0.962	0.00114486
Atp5k	4.59411e-11	1.69525	1	0.923	1.49097e-06
Nav2	1.51626e-06	1.68514	0.894	0.654	0.0492088
Rrad	7.59777e-09	-1.44161	0.957	1	0.000246578
Mpc1	1.02452e-06	-1.41081	0.809	0.923	0.0332497
Tpm1	2.0251e-12	-1.39284	1	1	6.57227e-08
Erh	8.96371e-07	1.6603	0.894	0.654	0.0290908
Rplp1	8.09194e-12	1.64708	1	1	2.62616e-07
Tns1	2.688e-08	1.59282	0.957	0.808	0.000872362
Zfp36l1	2.08222e-07	1.58845	0.957	0.808	0.00675762
H3f3b	1.34316e-10	-1.30245	0.979	1	4.35909e-06
Pafah1b1	8.42908e-07	-1.29991	0.809	0.962	0.0273557
Tcap	7.59978e-09	-1.24728	0.979	1	0.000246643
Vdac3	5.51559e-07	-1.23055	0.851	1	0.0179003
Rpl30	2.66264e-11	-1.15121	1	1	8.64133e-07
Ldhb	1.86172e-07	-1.0078	0.979	1	0.00604202
Cst3	2.86676e-07	-1.00218	0.979	1	0.00930377
Rpl4	1.94366e-11	1.57659	1	1	6.30794e-07
Fth1	3.31194e-09	-0.978152	1	1	0.000107486
Cycs	3.55182e-09	1.55816	1	0.962	0.000115271
Ndufb10	1.27893e-07	-0.960697	0.957	1	0.00415065
Rpl35	3.80859e-09	1.55111	1	0.962	0.000123604
Tpt1	2.3302e-09	-0.929855	1	1	7.56244e-05
Smdt1	1.20065e-06	-0.923385	0.979	1	0.0389657
Hnrnpa1	1.5898e-07	1.46442	0.979	0.885	0.00515954
Calr	1.44761e-06	1.41718	0.936	0.808	0.0469807
Vdac2	2.69635e-07	-0.913093	1	1	0.00875072
Map1lc3a	8.45119e-07	-0.909291	0.979	1	0.0274275
Rpl36a	1.53287e-11	1.36689	1	1	4.97479e-07
Hspb1	1.20065e-06	-0.89018	1	1	0.0389657
mt-Nd2	5.25375e-07	-0.886734	1	1	0.0170505
Rpl38	2.46163e-11	1.35641	1	1	7.98899e-07
Tnnt2	9.9826e-09	-0.88227	1	1	0.000323975
mt-Nd3	2.55043e-08	1.34206	1	0.962	0.000827718
Rps20	4.37745e-09	-0.878609	1	1	0.000142066
Rps10	6.3564e-08	-0.870615	1	1	0.0020629
Atp1a1	9.32647e-09	1.31998	1	0.962	0.000302681
Rpl31	4.4338e-10	1.26206	1	1	1.43894e-05
Rpl17	1.81625e-10	1.21076	1	1	5.89447e-06
Rplp2	9.18435e-11	1.17792	1	1	2.98069e-06
Nectin2	5.05398e-07	-5.03705	0	0.462	0.0164022
Cop1	5.05398e-07	-4.96186	0	0.462	0.0164022
Etfrf1	5.05398e-07	-4.95448	0	0.462	0.0164022
Gm47283	5.05398e-07	-4.90902	0	0.462	0.0164022
Mesd	5.05398e-07	-4.79322	0	0.462	0.0164022
Thap12	5.05398e-07	-4.68248	0	0.462	0.0164022
Kmt5a	5.05398e-07	-4.66866	0	0.462	0.0164022
4631405J19Rik	5.05398e-07	-4.58381	0	0.462	0.0164022
Cox8a	5.7955e-11	-0.842171	1	1	1.88087e-06
Cox7b	1.95623e-08	-0.797003	1	1	0.000634876
Cox5a	3.3199e-08	-0.78798	1	1	0.00107744
Rpl26	4.1296e-07	-0.786225	1	1	0.0134022
Rps24	2.5006e-09	-0.782832	1	1	8.11544e-05
Ndufb9	2.2418e-07	-0.764702	1	1	0.00727553
Rps6	6.18557e-09	1.14558	1	1	0.000200747
Rps28	1.74948e-07	1.05348	1	1	0.00567775
Ndufa11	1.27922e-07	-0.71358	0.957	1	0.00415157
Oaz1	8.71005e-09	-0.705032	0.979	1	0.000282676
Rpl37a	4.25262e-11	1.01957	1	1	1.38015e-06
Rpl11	1.2795e-07	0.919834	1	1	0.00415249
Myl7	1.27244e-06	0.918305	1	1	0.0412956
Rpl41	4.43516e-10	0.90943	1	1	1.43939e-05
Rpl19	2.87856e-09	-0.701574	1	1	9.34208e-05
Rps14	1.81625e-10	0.87406	1	1	5.89447e-06
Eif1	9.93895e-08	-0.642017	1	1	0.00322559
Slc25a4	1.36247e-07	-0.638485	1	1	0.00442175
Rplp0	3.04754e-07	-0.618018	1	1	0.00989049
Rpl37	8.21255e-08	0.781461	1	1	0.0026653
Rps19	4.60117e-08	0.778436	1	1	0.00149326
mt-Co3	1.13276e-06	0.662944	1	1	0.0367626
Eci1	1.60526e-06	-1.44658	0.574	0.962	0.052097
Timm17a	1.63036e-06	-1.18608	0.766	1	0.0529115
Ppp2r4	1.70982e-06	4.7014	0.596	0	0.0554906
2700094K13Rik	1.71023e-06	4.8974	0.596	0	0.0555039
Nhp2l1	1.71023e-06	4.8225	0.596	0	0.0555039
2310036O22Rik	1.71023e-06	4.7441	0.596	0	0.0555039
Ict1	1.71023e-06	4.71424	0.596	0	0.0555039
Rpl23a-ps3	1.71023e-06	4.70281	0.596	0	0.0555039
Gm9843	1.71023e-06	4.62901	0.596	0	0.0555039
Mesdc2	1.71023e-06	4.61146	0.596	0	0.0555039
Maip1	1.79667e-06	-4.83765	0	0.423	0.0583091
Tdtomato	1.79667e-06	-4.81456	0	0.423	0.0583091
Abraxas2	1.79667e-06	-4.79059	0	0.423	0.0583091
Cabcoco1	1.79667e-06	-4.76969	0	0.423	0.0583091
Naxd	1.79667e-06	-4.74533	0	0.423	0.0583091
F3	1.79667e-06	-4.73151	0	0.423	0.0583091
Hdgfl2	1.79667e-06	-4.60173	0	0.423	0.0583091
Rtl8b	1.79667e-06	-4.48747	0	0.423	0.0583091
Ufd1	1.79667e-06	-4.40945	0	0.423	0.0583091
Selenop	1.79667e-06	-4.37729	0	0.423	0.0583091
Mindy3	1.79667e-06	-4.20204	0	0.423	0.0583091
Kmt5b	1.79667e-06	-4.18945	0	0.423	0.0583091
Ndufb5	1.79802e-06	-0.751254	0.979	1	0.058353
Actc1	1.79802e-06	0.702838	1	1	0.058353
Got1	1.86259e-06	-1.2153	0.83	0.962	0.0604484
Tuba1a	2.13366e-06	1.21264	1	0.962	0.0692457
mt-Nd1	2.13366e-06	0.728399	1	1	0.0692457
Rpl39	2.25834e-06	0.705989	1	1	0.0732922
Crip2	2.39001e-06	-0.694537	1	1	0.0775653
Dusp5	2.44618e-06	-2.71674	0.064	0.577	0.0793883
Ubtd1	2.45163e-06	-2.42755	0.128	0.654	0.0795652
Rpl14	2.52902e-06	0.858149	1	1	0.082077
Cirbp	2.73043e-06	-1.40008	0.681	0.962	0.0886134
Pabpc1	2.74936e-06	1.44986	0.957	0.692	0.0892278
Psmb5	2.74936e-06	-1.14551	0.787	1	0.0892278
Lrrc10	2.80997e-06	-2.75434	0.085	0.615	0.0911947
Timm8a1	2.97983e-06	-3.8217	0.021	0.462	0.0967075
Zfos1	3.12099e-06	4.90776	0.574	0	0.101289
Nnt	3.12099e-06	4.81658	0.574	0	0.101289
Marcksl1	3.2831e-06	1.97223	0.809	0.462	0.10655
Obsl1	3.28643e-06	2.05512	0.787	0.346	0.106658
Sh3glb1	3.3231e-06	-1.26905	0.745	0.962	0.107848
Ptma	3.34823e-06	-0.810501	0.957	1	0.108663
Igfbp5	3.34881e-06	1.62283	0.979	1	0.108682
Atp5b	3.34881e-06	0.674139	1	1	0.108682
Atp6v0b	3.36412e-06	-1.28555	0.723	0.962	0.109179
Csrp3	3.54088e-06	0.999445	1	1	0.114916
Xist	3.59272e-06	-4.00183	0.043	0.5	0.116598
Mob1b	3.63306e-06	1.67801	0.915	0.5	0.117907
Hnrnpa3	3.73062e-06	1.24365	0.957	0.885	0.121074
Wisp1	3.73875e-06	2.33689	0.851	0.423	0.121337
Atf4	3.91149e-06	-2.24173	0.255	0.769	0.126943
Ppp1cb	4.37835e-06	1.23486	0.979	0.769	0.142095
Nr2f1	4.43825e-06	4.78757	0.617	0.077	0.144039
Scand1	4.64318e-06	-1.00616	0.872	1	0.15069
Klf6	4.78022e-06	-2.02612	0.362	0.846	0.155137
Fitm1	4.9037e-06	-1.21383	0.723	1	0.159145
2010111I01Rik	4.91489e-06	-3.15466	0.043	0.5	0.159508
Tomm20	4.91743e-06	-1.01249	0.894	1	0.15959
Eno3	4.93482e-06	-0.931137	0.979	1	0.160155
Plpp7	4.94864e-06	-2.28908	0.085	0.615	0.160603
Malt1	5.00268e-06	-2.84976	0.064	0.538	0.162357
Snrpd1	5.33687e-06	-1.45831	0.511	0.962	0.173203
Rasl11b	5.48766e-06	-1.47278	0.532	0.923	0.178096
Gm10250	5.61143e-06	4.67454	0.553	0	0.182113
Sepp1	5.61143e-06	4.52108	0.553	0	0.182113
Slmo2	5.61143e-06	4.52093	0.553	0	0.182113
Apoa1bp	5.61143e-06	4.50139	0.553	0	0.182113
Rel	5.7995e-06	-3.04501	0.064	0.538	0.188217
Ddx50	5.88313e-06	-2.08388	0.277	0.769	0.190931
Fermt2	6.05689e-06	-1.18265	0.83	1	0.19657
Fras1	6.08833e-06	3.30527	0.66	0.115	0.197591
Fau	6.14142e-06	-0.632301	1	1	0.199314
Mpped2	6.20156e-06	-5.71797	0	0.385	0.201265
Gucy1a1	6.20156e-06	-4.85484	0	0.385	0.201265
Coq8a	6.20156e-06	-4.78514	0	0.385	0.201265
Gm11361	6.20156e-06	-4.77132	0	0.385	0.201265
Dmac2	6.20156e-06	-4.55728	0	0.385	0.201265
Hikeshi	6.20156e-06	-4.4799	0	0.385	0.201265
Nsmce3	6.20156e-06	-4.36671	0	0.385	0.201265
Nsd3	6.20156e-06	-4.35376	0	0.385	0.201265
Utp11	6.20156e-06	-4.07026	0	0.385	0.201265
Ppp4r3a	6.20156e-06	-4.05557	0	0.385	0.201265
Maged2	6.71253e-06	1.46289	0.936	0.654	0.217848
Taf7	6.81469e-06	-3.55625	0.085	0.538	0.221164
Higd1a	6.97219e-06	-1.1479	0.787	0.962	0.226276
Lsm12	7.05924e-06	-1.73698	0.383	0.846	0.2291
Mkks	7.3879e-06	4.23256	0.574	0.038	0.239767
Cisd1	7.79166e-06	-0.818861	0.894	0.962	0.252871
Tbc1d16	8.00666e-06	2.89601	0.681	0.154	0.259848
Psap	8.33119e-06	1.37966	0.872	0.692	0.270381
Ftl1	8.49382e-06	0.968649	1	1	0.275658
Csnk2a2	8.8835e-06	-2.27269	0.213	0.692	0.288305
Ogt	8.94072e-06	2.36437	0.745	0.269	0.290162
Cnn1	9.30707e-06	2.0785	0.83	0.462	0.302052
Vgll4	9.85692e-06	-2.38856	0.149	0.654	0.319896
Cxx1b	9.94448e-06	4.55537	0.532	0	0.322738
Cox7a2	9.97178e-06	-0.548328	1	1	0.323624
Serpinb6a	1.03211e-05	-1.34104	0.511	0.962	0.334961
Rps17	1.05168e-05	0.56819	1	1	0.341313
Gja3	1.05671e-05	-2.62495	0.043	0.5	0.342944
Rps3a1	1.10903e-05	-0.457587	1	1	0.359924
Atf3	1.12683e-05	-1.51904	0.489	0.923	0.365702
Rps15	1.16935e-05	0.515692	1	1	0.379501
Rock1	1.18111e-05	-1.3314	0.532	0.923	0.383318
Pfn1	1.26554e-05	0.964661	0.979	0.962	0.410719
Epha4	1.32288e-05	2.0461	0.83	0.346	0.429328
Bri3	1.36884e-05	-0.836107	0.936	1	0.444243
Ppia	1.36947e-05	0.566854	1	1	0.444447
Lnpep	1.37929e-05	-2.65869	0.085	0.538	0.447636
Ccdc85b	1.4751e-05	-2.65445	0.106	0.577	0.478728
Eif5	1.49356e-05	-1.06668	0.83	0.962	0.484719
Cox7c	1.52098e-05	-0.454097	1	1	0.49362
Coq10b	1.53402e-05	-2.18108	0.149	0.654	0.497851
Wtip	1.58697e-05	-2.05438	0.17	0.654	0.515035
Mtdh	1.64765e-05	-1.52449	0.681	0.962	0.534727
H19	1.71912e-05	3.52277	0.638	0.077	0.557922
Ccng1	1.73608e-05	1.65109	0.894	0.577	0.563427
Acvr1c	1.73781e-05	4.57361	0.511	0	0.563988
Rpl6l	1.73781e-05	4.30239	0.511	0	0.563988
Adrbk2	1.73781e-05	4.28658	0.511	0	0.563988
Fdx1l	1.73781e-05	4.08072	0.511	0	0.563988
Atp5c1	1.77816e-05	-0.522085	1	1	0.577083
Nid2	1.82496e-05	2.23756	0.723	0.269	0.592272
Rpl10a	1.87245e-05	0.611939	1	1	0.607684
mt-Atp6	1.87273e-05	0.630771	1	1	0.607775
Rab21	1.92772e-05	-1.68691	0.34	0.808	0.625623
Arhgef7	2.02404e-05	2.06297	0.787	0.423	0.656881
Fkbp3	2.06579e-05	-1.01384	0.872	1	0.670431
Ndufab1	2.07643e-05	-0.619308	1	1	0.673885
Cox6c	2.07643e-05	-0.431015	1	1	0.673885
Gm20594	2.08168e-05	-4.55968	0	0.346	0.67559
Hdgfl3	2.08168e-05	-4.55756	0	0.346	0.67559
Washc3	2.08168e-05	-4.29167	0	0.346	0.67559
Srp54a	2.08168e-05	-4.11595	0	0.346	0.67559
Gm49083	2.08168e-05	-3.96631	0	0.346	0.67559
Eloa	2.08168e-05	-3.93726	0	0.346	0.67559
Mettl26	2.08168e-05	-3.90917	0	0.346	0.67559
Mir670hg	2.08168e-05	-3.88298	0	0.346	0.67559
Eif4a2	2.09704e-05	1.55272	0.83	0.538	0.680573
Kif1b	2.1167e-05	1.32026	0.915	0.731	0.686953
Ucp2	2.15941e-05	-2.98141	0.106	0.538	0.700815
Adcy5	2.20389e-05	1.98138	0.745	0.231	0.715249
Mb	2.20898e-05	-3.67106	0.234	0.692	0.716903
Irf1	2.25483e-05	-2.67339	0.128	0.577	0.731782
Hipk3	2.36899e-05	1.32367	0.894	0.577	0.768831
Gde1	2.51733e-05	-1.38895	0.638	0.962	0.816974
Ndufa3	2.54884e-05	0.8415	1	0.962	0.827201
Pum2	2.56237e-05	2.0937	0.745	0.308	0.831592
Mid1ip1	2.58525e-05	-2.58838	0.128	0.615	0.839016
Id3	2.62336e-05	-2.28651	0.489	0.846	0.851385
Vegfb	2.62542e-05	-1.27828	0.681	0.962	0.852055
Hnrnpk	2.6363e-05	1.28634	0.957	0.731	0.855585
Ube2m	2.64094e-05	-1.19554	0.681	0.923	0.857089
Vapa	2.64374e-05	-1.21646	0.702	1	0.858
Pnrc1	2.64996e-05	-1.54723	0.681	0.885	0.860017
Tspo	2.69257e-05	-1.7484	0.468	0.885	0.873847
Relb	2.76451e-05	-4.02709	0.021	0.385	0.897193
Snrpg	2.86283e-05	1.64775	0.809	0.462	0.929103
Ech1	2.88375e-05	-1.47188	0.723	0.923	0.935894
Mybphl	2.91254e-05	1.81267	0.787	0.308	0.945236
Rps26-ps1	2.99581e-05	4.40215	0.489	0	0.972261
Gm5900	2.99581e-05	4.11392	0.489	0	0.972261
Hadha	3.02685e-05	-1.06113	0.766	1	0.982334
Klf9	3.20704e-05	-2.10407	0.17	0.615	1
Ncoa4	3.25245e-05	-3.54483	0.021	0.385	1
Idh2	3.28385e-05	-0.723604	1	1	1
Rhoc	3.3314e-05	-1.65875	0.617	0.923	1
Creb3l2	3.3393e-05	1.84843	0.809	0.462	1
Wdr89	3.50241e-05	2.32814	0.681	0.192	1
Pfdn5	3.54051e-05	-0.638511	0.979	0.962	1
Ednra	3.54324e-05	2.67086	0.638	0.154	1
Sfr1	3.75449e-05	-0.923029	0.83	0.962	1
Id1	3.9858e-05	-2.65778	0.128	0.577	1
Eid1	3.99337e-05	-0.965537	0.872	1	1
Adnp	4.14033e-05	-3.24672	0.021	0.385	1
Eid2	4.16012e-05	-2.09781	0.17	0.654	1
Grpel1	4.16506e-05	-1.3761	0.596	0.923	1
Kdr	4.41174e-05	3.96116	0.511	0.038	1
1810022K09Rik	4.51521e-05	-1.429	0.468	0.885	1
Eif3h	4.65721e-05	1.60814	0.979	1	1
Rps27rt	4.81647e-05	2.11189	0.681	0.192	1
Hcn1	4.8552e-05	-2.99191	0.021	0.385	1
Rpl5	4.89309e-05	-0.665584	1	1	1
Zfand5	4.89526e-05	-1.30434	0.745	0.962	1
Prkcdbp	5.09687e-05	4.29756	0.468	0	1
Srp54b	5.09687e-05	4.23682	0.468	0	1
Suv420h1	5.09687e-05	4.20183	0.468	0	1
Lyrm5	5.09687e-05	4.07747	0.468	0	1
Nudt8	5.09687e-05	3.92942	0.468	0	1
Cox6a2	5.14027e-05	-0.546769	1	1	1
Hmgb1	5.28201e-05	1.31182	0.872	0.846	1
Spag7	5.49369e-05	2.44856	0.681	0.269	1
Gng2	5.51375e-05	2.4029	0.66	0.192	1
Dnajc3	5.93598e-05	-1.82192	0.404	0.769	1
Rpl35a	5.95475e-05	0.580161	1	1	1
Atp5h	5.95475e-05	-0.500722	1	1	1
1500009L16Rik	5.95598e-05	-1.65752	0.213	0.731	1
Ddx17	5.96536e-05	1.96981	0.745	0.385	1
Mfap2	6.03154e-05	2.42636	0.681	0.231	1
Ppp1r15a	6.17572e-05	-2.33058	0.149	0.615	1
Nrtn	6.4323e-05	-1.6421	0.511	0.885	1
Sh3gl3	6.70861e-05	-3.55022	0.085	0.462	1
Dcpp1	6.80743e-05	-5.22305	0	0.308	1
Bmt2	6.80743e-05	-4.4519	0	0.308	1
Gucy1b1	6.80743e-05	-4.40059	0	0.308	1
Paxx	6.80743e-05	-4.34898	0	0.308	1
Smim27	6.80743e-05	-3.94855	0	0.308	1
E330017L17Rik	6.80743e-05	-3.91242	0	0.308	1
Slf2	6.80743e-05	-3.85561	0	0.308	1
Bud23	6.80743e-05	-3.77559	0	0.308	1
Dkk3	6.83435e-05	3.15713	0.553	0.077	1
Atp5f1	6.89043e-05	-0.651108	1	1	1
Gm8797	7.1027e-05	2.28416	0.681	0.269	1
Zcrb1	7.14127e-05	-0.96806	0.766	0.962	1
Kcnj5	7.14804e-05	1.73276	0.809	0.5	1
Eif1a	7.15396e-05	-2.00996	0.255	0.692	1
Rtn4	7.15439e-05	-0.967095	0.83	1	1
Ufc1	7.29772e-05	-1.53016	0.511	0.846	1
Rala	7.29772e-05	-1.37979	0.489	0.885	1
Phf13	7.60398e-05	-2.2199	0.064	0.462	1
Rbm20	7.84935e-05	1.6988	0.766	0.346	1
Pim3	8.04714e-05	-1.84793	0.277	0.731	1
Hbb-bt	8.23096e-05	3.44762	0.489	0.038	1
Hist1h2bc	8.28229e-05	-1.54455	0.149	0.615	1
Ddb1	8.38913e-05	1.66611	0.809	0.385	1
Fry	8.46293e-05	1.9751	0.766	0.385	1
Lamb1	8.46293e-05	1.69513	0.766	0.385	1
Erbb2ip	8.55983e-05	3.94809	0.447	0	1
B630005N14Rik	8.56152e-05	4.19016	0.447	0	1
Prkrir	8.56152e-05	3.9548	0.447	0	1
Toporsos	8.56152e-05	3.79092	0.447	0	1
Rps18-ps3	8.56152e-05	3.78874	0.447	0	1
Aes	8.74368e-05	-0.805563	0.894	1	1
Csrp2	8.76128e-05	1.38735	0.979	0.923	1
Chchd10	8.76568e-05	-0.491539	1	1	1
Dnmt3a	8.86457e-05	1.60259	0.787	0.385	1
Sirt1	8.88271e-05	-2.2548	0.085	0.5	1
Nfil3	8.97354e-05	-1.98094	0.234	0.692	1
Unc5b	9.1014e-05	1.84143	0.766	0.346	1
Arhgap10	9.47109e-05	-1.85552	0.234	0.692	1
Calm1	9.5002e-05	-0.989251	0.809	1	1
Irs2	9.77144e-05	-2.23241	0.17	0.615	1
Cryab	0.000101123	-0.581309	1	1	1
Pam	0.000105887	1.14627	1	0.846	1
Myl4	0.00010603	0.547627	1	1	1
Hsp90ab1	0.00010603	-0.456982	1	1	1
Ppp1r14b	0.000106377	-1.22199	0.809	0.962	1
Pfdn1	0.000107638	-0.988281	0.723	0.962	1
Slc22a1	0.000111161	0.942396	1	0.962	1
Morf4l1	0.000111161	0.639157	1	1	1
Gm26735	0.000111484	-3.26084	0.021	0.346	1
Ryr3	0.000114255	3.14217	0.553	0.115	1
Ndufa12	0.00012212	-0.54594	0.957	1	1
Gkap1	0.000125891	-1.63682	0.319	0.769	1
Manf	0.000128158	-1.60872	0.574	0.962	1
Adh5	0.000129651	-1.25991	0.447	0.846	1
Myl12a	0.000129713	1.15559	0.894	0.885	1
Eef2	0.000134123	0.608629	1	1	1
Smad7	0.000137491	-2.03741	0.362	0.769	1
Ccser2	0.000137721	-0.995649	0.702	0.962	1
Sar1b	0.000139954	-1.1945	0.681	0.923	1
Gm14698	0.000142049	4.26336	0.426	0	1
Rfwd2	0.000142049	4.09407	0.426	0	1
Mllt4	0.000142049	4.03447	0.426	0	1
2310015A10Rik	0.000142049	3.82681	0.426	0	1
Ufd1l	0.000142049	3.71456	0.426	0	1
Serpinb6b	0.000143319	2.68157	0.596	0.115	1
Lamtor3	0.000145292	-2.5065	0.106	0.5	1
Lcp1	0.000146223	-3.12646	0.064	0.423	1
Adm	0.000152395	3.9056	0.511	0.077	1
Cxcl1	0.00015245	-3.81099	0.021	0.346	1
Mybpc3	0.000154129	0.797617	0.979	0.923	1
Rpl32	0.000154183	0.592212	1	1	1
Slc25a3	0.000161501	-0.516367	1	1	1
Cish	0.000161592	-1.51565	0.298	0.769	1
Ddit3	0.000162358	-2.00753	0.234	0.654	1
Socs2	0.000164998	-1.43499	0.362	0.808	1
Cox7a1	0.000168732	0.965476	0.957	0.885	1
Fkbp1a	0.000169046	0.812919	0.979	0.923	1
Dpysl3	0.000175355	-0.911339	0.83	1	1
Itga9	0.000175734	2.92869	0.553	0.154	1
Arl4a	0.000175823	-2.07875	0.213	0.654	1
Rab11a	0.00017591	1.29288	0.872	0.692	1
Nebl	0.000176677	-0.851759	0.894	1	1
Clic4	0.000180011	1.24024	0.851	0.731	1
Mcam	0.000180569	2.75552	0.574	0.154	1
Ndufa5	0.000185398	-0.50418	1	1	1
Ssh2	0.000190922	2.02689	0.66	0.269	1
Rfxap	0.000190952	-1.99131	0.191	0.577	1
Caprin1	0.000191397	1.89289	0.702	0.423	1
Celf2	0.000191467	1.72738	0.766	0.5	1
Sgcd	0.000192068	-2.50433	0.021	0.346	1
Sorbs1	0.000192068	-2.38429	0.021	0.346	1
Tiparp	0.000198217	-1.39156	0.234	0.692	1
Cdc37l1	0.000200417	-1.72431	0.383	0.769	1
Nfia	0.000201175	1.39657	0.894	0.731	1
Csrnp1	0.000201917	-2.25568	0.128	0.538	1
Btbd7	0.000202516	-2.35673	0.085	0.462	1
Rbm3	0.000202652	-0.924187	0.894	1	1
Raph1	0.000214127	1.95777	0.723	0.346	1
Gm11808	0.000214341	1.68917	0.702	0.308	1
Synpo2l	0.000217025	1.24867	0.872	0.808	1
Cavin3	0.000217329	-4.32805	0	0.269	1
Igsf9b	0.000217329	-4.04917	0	0.269	1
Gm10602	0.000217329	-4.04181	0	0.269	1
Nsd2	0.000217329	-3.94557	0	0.269	1
Irx5	0.000217329	-3.80519	0	0.269	1
Ddx23	0.000217329	-3.74031	0	0.269	1
Eef1akmt1	0.000217329	-3.64559	0	0.269	1
Ppp4r3b	0.000217329	-3.6447	0	0.269	1
Eef1akmt2	0.000217329	-3.63749	0	0.269	1
Tug1	0.000217329	-3.63646	0	0.269	1
Gsdme	0.000217329	-3.49094	0	0.269	1
Gadd45g	0.000220367	-1.46232	0.766	0.962	1
Ehd4	0.000226262	-1.0137	0.766	0.885	1
Cdc14b	0.0002277	1.73527	0.702	0.346	1
Eif3c	0.000229642	-1.08608	0.617	0.923	1
Celf1	0.000232569	1.08422	0.872	0.577	1
Vimp	0.00023289	3.94876	0.404	0	1
Gm8186	0.00023289	3.84654	0.404	0	1
l7Rn6	0.00023289	3.75508	0.404	0	1
Utp11l	0.00023289	3.48516	0.404	0	1
Armcx5	0.000233198	-2.58457	0.064	0.423	1
Pbrm1	0.000239355	1.23743	0.851	0.692	1
Gjc1	0.000241785	-1.52822	0.511	0.846	1
Usmg5	0.000243494	0.574608	1	1	1
Rps5	0.000254699	0.552741	1	1	1
Ndufs7	0.000265805	-0.728936	0.894	1	1
Gnao1	0.000266407	1.43819	0.851	0.615	1
S100a1	0.00027197	-1.0702	0.787	0.962	1
Nudc	0.000277613	-1.21221	0.489	0.885	1
Syap1	0.000283704	-2.41272	0.064	0.423	1
Sertad2	0.000283934	-1.69537	0.277	0.692	1
Arid1a	0.000291179	1.71555	0.723	0.385	1
Uqcrq	0.000291286	-0.47463	1	1	1
Cnot6	0.0003042	1.59177	0.766	0.385	1
Chpt1	0.000308031	-1.17305	0.617	0.885	1
Kcnj3	0.000310702	1.872	0.723	0.346	1
Pnkp	0.000317708	-2.33181	0.106	0.462	1
Ddah1	0.000321306	2.29115	0.553	0.115	1
Erbb2	0.000329253	2.11618	0.574	0.154	1
Clta	0.000331351	-0.973305	0.702	1	1
Got2	0.000332046	0.873632	0.979	0.846	1
N4bp1	0.000332526	-2.09826	0.085	0.462	1
Mef2a	0.000332611	0.791857	0.957	0.962	1
Gpx4	0.000332752	-0.627615	0.979	1	1
Atp5g1	0.000332752	-0.523324	1	1	1
Rpl18	0.000332752	-0.449021	1	1	1
Apopt1	0.000333961	-1.42705	0.277	0.731	1
Dnajc5	0.000334083	1.90653	0.702	0.423	1
Asap1	0.000344217	-2.02904	0.17	0.577	1
Ift22	0.000345502	-2.0667	0.043	0.385	1
Tax1bp1	0.000351336	-1.0516	0.596	0.885	1
Serpinh1	0.000352367	0.983446	0.894	0.885	1
Sod2	0.000363398	-0.579304	1	1	1
Nup98	0.00037076	-3.36655	0.021	0.308	1
Fcmr	0.000377462	4.51794	0.383	0	1
Fam188a	0.000377462	3.59834	0.383	0	1
Erdr1	0.000377462	3.58295	0.383	0	1
0610007P14Rik	0.000377462	3.56593	0.383	0	1
1700040L02Rik	0.000377462	3.46674	0.383	0	1
Irx4	0.000380109	-3.14058	0.043	0.346	1
Ppm1d	0.000385972	-2.93385	0.064	0.385	1
Rock2	0.000392623	-1.57056	0.574	0.808	1
Perp	0.000396667	0.676801	1	1	1
Eef1g	0.000396667	0.638814	1	1	1
Nrep	0.000399027	1.48058	0.894	0.692	1
Thsd7a	0.000400283	-3.18217	0.021	0.308	1
Irx3	0.000400283	-3.16803	0.021	0.308	1
Fuca2	0.000402169	-1.32757	0.34	0.769	1
Kcne1	0.000402468	-1.46402	0.638	0.885	1
Arxes2	0.000412902	3.27327	0.426	0.038	1
Wwc2	0.000420118	-1.73265	0.277	0.692	1
Ubxn2a	0.000422263	-1.31124	0.234	0.692	1
Adora1	0.000423023	2.57733	0.511	0.115	1
Nono	0.000423839	1.48576	0.787	0.462	1
Corin	0.000429509	2.5548	0.532	0.115	1
Inpp4b	0.000431992	-2.75885	0.021	0.308	1
Sap18	0.00046757	1.68307	0.66	0.269	1
Adprhl1	0.000468448	-0.854946	0.766	0.962	1
Prkg1	0.000468764	-2.86187	0.043	0.346	1
Dhx36	0.000490606	-1.66918	0.298	0.692	1
Rps23	0.000492702	0.497345	1	1	1
Psmd8	0.000495891	-0.824091	0.745	0.962	1
Aplp2	0.000501652	1.0636	0.936	0.885	1
Ppargc1a	0.000523135	1.21254	0.851	0.5	1
Park7	0.000557221	-0.707881	0.872	0.962	1
Myl9	0.000560308	0.678891	1	1	1
Gpc1	0.000570336	1.39867	0.809	0.577	1
Ramp1	0.000583554	-0.802816	0.894	1	1
Pdlim1	0.00058377	-2.35476	0.021	0.308	1
Casp3	0.00058377	-1.72753	0.021	0.308	1
Minos1	0.000584699	-0.493241	0.979	1	1
Cep350	0.000586029	-1.84525	0.149	0.538	1
Rest	0.000586852	-1.3944	0.383	0.769	1
Tesc	0.000593202	-1.52515	0.34	0.692	1
Setd8	0.000605054	3.87434	0.362	0	1
Ikbkb	0.000605054	3.30779	0.362	0	1
Fam81a	0.00061613	-1.64708	0.191	0.615	1
Ets2	0.000620387	1.57886	0.745	0.423	1
Lsm4	0.000623029	-0.88964	0.766	1	1
Ndufa4	0.000636474	-0.435619	1	1	1
Cap1	0.000652681	2.93395	0.404	0.038	1
Ddx3x	0.00066235	1.33607	0.809	0.731	1
Tmed9	0.000662415	-0.963297	0.681	0.962	1
Akirin1	0.000672501	-1.10834	0.404	0.846	1
Cryzl2	0.00067913	-4.18979	0	0.231	1
Ints14	0.00067913	-3.95576	0	0.231	1
Erg28	0.00067913	-3.83849	0	0.231	1
Ints13	0.00067913	-3.82562	0	0.231	1
Itga7	0.00067913	-3.82184	0	0.231	1
Crkl	0.00067913	-3.7102	0	0.231	1
Grk2	0.00067913	-3.67675	0	0.231	1
Washc2	0.00067913	-3.67532	0	0.231	1
Hectd4	0.00067913	-3.60749	0	0.231	1
Gatd1	0.00067913	-3.57852	0	0.231	1
Pcnx4	0.00067913	-3.5489	0	0.231	1
Mfsd14a	0.00067913	-3.51905	0	0.231	1
Lnpk	0.00067913	-3.5079	0	0.231	1
Pdxp	0.00067913	-3.50651	0	0.231	1
Ints11	0.00067913	-3.45749	0	0.231	1
Gm30025	0.00067913	-3.45739	0	0.231	1
Twnk	0.00067913	-3.44933	0	0.231	1
CAAA01118383.1	0.00067913	-3.44554	0	0.231	1
Tfdp1	0.00067913	-3.30902	0	0.231	1
Riiad1	0.00067913	-3.29795	0	0.231	1
Fas	0.00067913	-3.2721	0	0.231	1
Suclg1	0.000692356	-0.74998	0.957	1	1
Fam104a	0.000696619	-0.822759	0.702	0.885	1
Maged1	0.000706794	1.16986	0.787	0.577	1
Ranbp1	0.000713932	1.07527	0.851	0.692	1
Aldh5a1	0.000715599	2.45183	0.489	0.115	1
Col12a1	0.000720471	-2.33407	0.106	0.423	1
Actg1	0.000726019	1.08167	0.894	0.808	1
Nudt22	0.000726445	-1.65474	0.128	0.538	1
Senp6	0.000734013	-1.01688	0.553	0.923	1
Rbbp7	0.000736203	1.06026	0.872	0.615	1
Ccnd2	0.000748464	1.15127	0.851	0.808	1
Hint1	0.000785151	-0.472364	1	1	1
Rpl8	0.000785151	-0.3854	1	1	1
Phlda1	0.000786743	-3.07682	0.128	0.462	1
Snx6	0.000795724	-1.21501	0.255	0.731	1
Calu	0.000812387	1.21167	0.787	0.692	1
Uba1	0.000831497	1.58705	0.745	0.462	1
Mbnl2	0.000835942	-0.831502	0.787	0.962	1
Ndufb2	0.000853185	0.575328	0.979	1	1
Fbxw8	0.00086102	2.51576	0.489	0.154	1
Mphosph10	0.00086402	-2.32448	0.043	0.346	1
Ier2	0.000864924	-1.28089	0.426	0.769	1
Pgls	0.000864944	-0.874083	0.681	0.885	1
Supt16	0.000866179	-1.55106	0.191	0.577	1
Aen	0.000869993	-1.70825	0.128	0.5	1
Vcp	0.000871359	-0.84974	0.787	0.962	1
Med13	0.000872609	-0.86752	0.255	0.731	1
Rin2	0.000873472	-2.02391	0.085	0.423	1
Cluh	0.000884817	1.70917	0.617	0.231	1
Camk1d	0.000897745	2.94699	0.404	0.038	1
Nras	0.000911978	1.83439	0.617	0.269	1
Csnk2a1	0.000914695	1.85019	0.617	0.346	1
Cdk16	0.000917948	1.45417	0.702	0.346	1
Rufy1	0.000920179	-1.4066	0.17	0.577	1
mt-Nd5	0.000926652	-0.571662	1	1	1
Nars	0.000930633	-1.30904	0.255	0.654	1
Ddx39	0.000939482	-1.40798	0.298	0.692	1
Mrpl51	0.00093993	-0.828996	0.638	0.962	1
Gpr146	0.000950041	-2.20747	0.106	0.462	1
Gucy1b3	0.000959639	3.8988	0.34	0	1
Carkd	0.000959639	3.85186	0.34	0	1
Gm26825	0.000959639	3.82529	0.34	0	1
Whsc1	0.000959639	3.57992	0.34	0	1
Gm6483	0.000959639	3.49695	0.34	0	1
Ccdc53	0.000959639	3.47435	0.34	0	1
A930011G23Rik	0.000959639	3.3876	0.34	0	1
Wdr74	0.000959639	3.33395	0.34	0	1
Vwa9	0.000959639	3.29661	0.34	0	1
Ammecr1	0.000959639	3.16708	0.34	0	1
Arpc2	0.000960647	-0.775415	0.851	1	1
Ddah2	0.000971914	-1.31351	0.404	0.769	1
Amotl2	0.000974925	-1.37977	0.255	0.654	1
B230118H07Rik	0.000974925	-1.25058	0.255	0.654	1
Malsu1	0.000982412	-1.67925	0.319	0.692	1
Bphl	0.00102085	-1.66949	0.128	0.5	1
Trim11	0.00102232	2.32026	0.511	0.154	1
Ppp1r2	0.001026	-1.09562	0.66	0.885	1
Ndnf	0.00103101	-3.57278	0.021	0.269	1
Ppp3r1	0.00104492	2.14766	0.532	0.154	1
Ank3	0.0010567	1.1436	0.851	0.615	1
Zdhhc13	0.00107629	3.07537	0.383	0.038	1
Mphosph8	0.00109121	-1.01704	0.447	0.846	1
Fstl1	0.00109162	1.14378	0.83	0.769	1
Rab11fip5	0.00109847	1.75822	0.596	0.192	1
Luc7l3	0.00110315	1.31384	0.787	0.423	1
Lpin1	0.00110586	-1.97621	0.149	0.5	1
Fam213b	0.00112207	-1.88085	0.255	0.615	1
Twistnb	0.00112207	-1.43949	0.255	0.615	1
Fem1a	0.00112496	2.23741	0.553	0.231	1
Txnl4a	0.00112585	-1.1518	0.532	0.808	1
Ndufa13	0.00113672	-0.45473	1	1	1
Gm10260	0.00120668	0.66714	0.979	0.885	1
Rrm2b	0.00121385	-1.77889	0.128	0.462	1
B3gat3	0.00121989	-1.68165	0.191	0.577	1
Rras	0.00123142	-1.35222	0.489	0.846	1
Atp5g2	0.00123245	-0.43007	0.979	1	1
Gspt1	0.00127304	-1.32175	0.34	0.692	1
Gng5	0.00128306	-0.376304	1	1	1
Lxn	0.00128866	2.84728	0.511	0.154	1
Nt5dc2	0.00129032	1.77997	0.702	0.385	1
Ogfrl1	0.00130922	-1.81131	0.17	0.538	1
Serf1	0.00134321	1.78087	0.702	0.423	1
Btg1	0.0013448	-0.920246	0.617	0.846	1
Atf7ip	0.00134783	1.73205	0.638	0.308	1
Rgs10	0.00135144	-1.30986	0.383	0.731	1
Dnaja2	0.00137243	-1.20674	0.638	0.846	1
Rsbn1l	0.00138321	-1.41365	0.447	0.731	1
Fam189a2	0.00138423	-1.39041	0.511	0.846	1
Klhl24	0.00141024	-1.17178	0.383	0.731	1
Aldh1b1	0.00142846	1.50875	0.745	0.462	1
Hnrnpc	0.001429	1.1734	0.787	0.577	1
Mlf1	0.00144663	-0.518605	1	1	1
Atp5j2	0.00144663	-0.350098	1	1	1
Pmvk	0.00145585	-1.66228	0.298	0.615	1
Pbx1	0.00146143	1.15443	0.83	0.654	1
Mark3	0.00146681	-1.63507	0.404	0.731	1
Rwdd1	0.00147938	-0.973193	0.638	0.923	1
Ssr4	0.00149868	-0.69325	0.766	0.962	1
Atp5d	0.00150529	-0.471832	0.979	1	1
Aif1l	0.00150666	3.54329	0.319	0	1
BC030336	0.00150666	3.4472	0.319	0	1
Fam73b	0.00150666	3.4376	0.319	0	1
Atp5sl	0.00150666	3.32195	0.319	0	1
Gns	0.00150666	3.31529	0.319	0	1
Smek2	0.00150666	3.24131	0.319	0	1
BC026585	0.00150666	3.21643	0.319	0	1
Prune	0.00150666	3.18934	0.319	0	1
Fam134b	0.00150666	3.09822	0.319	0	1
Socs3	0.00151124	-1.81544	0.213	0.577	1
Ppp3cb	0.001533	1.96209	0.553	0.231	1
Gm26532	0.00162684	-2.86458	0.043	0.308	1
Ndufb11	0.00162922	-0.412495	1	1	1
Ap3s1	0.00167206	2.06281	0.532	0.231	1
Bcl9	0.00167224	-1.42559	0.17	0.538	1
Frat2	0.00167247	-2.17828	0.106	0.423	1
Rab1a	0.00169168	1.10311	0.872	0.538	1
Trappc10	0.0017031	-1.49238	0.191	0.577	1
Setd7	0.00171689	3.18423	0.404	0.077	1
Dusp18	0.00172895	-2.16105	0.021	0.269	1
Bche	0.00173118	2.24983	0.489	0.154	1
Upf3a	0.00173414	-2.53624	0.064	0.346	1
Ppp1r18	0.0017375	-2.58892	0.043	0.308	1
Polr1d	0.00174519	-0.752985	0.809	1	1
Pelp1	0.0017539	3.24512	0.362	0.038	1
Arrdc3	0.00175514	2.51191	0.426	0.077	1
Nol7	0.00175993	-0.909331	0.66	0.923	1
Sike1	0.00176609	1.53094	0.723	0.462	1
Pcmt1	0.00178119	-0.964136	0.574	0.923	1
Cdkn2aip	0.0018205	-1.50251	0.213	0.577	1
Hypk	0.00182351	1.84102	0.553	0.231	1
Gm15013	0.00184256	-2.31356	0.064	0.346	1
Rrn3	0.00184698	2.69737	0.362	0.038	1
Cog6	0.00184698	2.4677	0.362	0.038	1
Fer	0.00185506	-2.36358	0.043	0.308	1
Tox3	0.00189406	-1.53263	0.362	0.731	1
Ankrd12	0.00192861	-1.3284	0.213	0.615	1
Arf5	0.00196792	-0.760121	0.83	1	1
Pygm	0.0019856	0.964671	0.872	0.692	1
Rgs12	0.00198809	1.12578	0.851	0.654	1
Idh3b	0.00200026	-0.918148	0.745	0.962	1
Lamtor4	0.00203989	-0.708333	0.851	0.923	1
Dbf4	0.00208451	-3.63513	0	0.192	1
Nectin3	0.00208451	-3.55842	0	0.192	1
Gm43050	0.00208451	-3.5511	0	0.192	1
Gm26526	0.00208451	-3.48182	0	0.192	1
Irx2	0.00208451	-3.44318	0	0.192	1
S100a6	0.00208451	-3.37173	0	0.192	1
Ttc12	0.00208451	-3.37029	0	0.192	1
Patj	0.00208451	-3.31121	0	0.192	1
Chmp1b	0.00208451	-3.30507	0	0.192	1
Ggact	0.00208451	-3.29632	0	0.192	1
Large1	0.00208451	-3.28412	0	0.192	1
Gm47547	0.00208451	-3.28184	0	0.192	1
Mia2	0.00208451	-3.26287	0	0.192	1
Ccrl2	0.00208451	-3.24288	0	0.192	1
Babam2	0.00208451	-3.22346	0	0.192	1
Tlnrd1	0.00208451	-3.13231	0	0.192	1
Rap1gap	0.00208451	-3.10147	0	0.192	1
Retreg2	0.00208451	-3.0588	0	0.192	1
Sbno2	0.00208451	-2.97772	0	0.192	1
Stat5a	0.00208451	-2.80119	0	0.192	1
Tanc2	0.00212188	1.86	0.553	0.192	1
Cbx6	0.00219295	1.758	0.681	0.385	1
Vdac1	0.00222473	-0.580163	0.979	1	1
Cd81	0.00222473	-0.570558	0.979	1	1
Hist3h2ba	0.00227829	1.40116	0.617	0.231	1
Pcp4l1	0.00228242	-1.225	0.468	0.769	1
Fibp	0.00229724	-1.0292	0.638	0.846	1
Hdgfrp3	0.00234272	3.4165	0.298	0	1
Fam63b	0.00234272	3.39456	0.298	0	1
Fam178a	0.00234272	3.39196	0.298	0	1
Prosc	0.00234272	3.35881	0.298	0	1
Crlf3	0.00234272	3.26279	0.298	0	1
Ephb3	0.00234272	3.25619	0.298	0	1
Rpl13-ps3	0.00234272	3.11636	0.298	0	1
Mbd2	0.00235501	-1.37379	0.34	0.615	1
Agl	0.00238689	1.65943	0.638	0.346	1
Rae1	0.00241164	-1.25446	0.298	0.654	1
Hibch	0.0024154	-1.07012	0.213	0.615	1
Cdo1	0.00242338	-2.7169	0.128	0.423	1
Zfp207	0.00242737	1.56205	0.617	0.269	1
Arid4a	0.00243289	-1.83085	0.106	0.423	1
Mrpl16	0.00243545	-1.23969	0.404	0.769	1
Copa	0.00243853	1.85629	0.574	0.231	1
Gtf2i	0.00247555	1.12584	0.809	0.577	1
Tmsb10	0.00249533	0.629601	0.979	1	1
Atp5g3	0.00249533	-0.39426	1	1	1
Ttyh3	0.00250748	2.75641	0.362	0.038	1
Strbp	0.00252533	2.22991	0.468	0.154	1
Fdps	0.00252586	-1.00223	0.17	0.577	1
S100a13	0.00254531	-1.15818	0.553	0.808	1
Wdr82	0.00256591	1.81841	0.532	0.192	1
Cystm1	0.00259564	-1.28083	0.34	0.654	1
Nt5c3	0.0026107	1.97191	0.617	0.346	1
Med8	0.0026611	-1.41676	0.277	0.615	1
Mtss1	0.00266137	1.33949	0.787	0.654	1
Acp1	0.00266181	-0.961746	0.468	0.846	1
Ubl7	0.00267733	1.78709	0.532	0.192	1
Hfe2	0.00270211	-1.72285	0.106	0.423	1
Plk2	0.00271572	-2.5473	0.17	0.462	1
Fam13b	0.00272765	-1.86766	0.043	0.308	1
Rpl9-ps6	0.00273986	2.09367	0.468	0.115	1
Cct2	0.00274864	-0.852952	0.638	0.962	1
Txnl1	0.00275733	-0.869513	0.702	0.923	1
Spag9	0.00276629	-1.01064	0.404	0.808	1
Cul3	0.00278201	-1.45009	0.489	0.731	1
Slc25a25	0.00279376	-2.03164	0.064	0.346	1
Rassf1	0.00279721	-1.48593	0.362	0.692	1
Coq7	0.00287197	-1.01762	0.66	0.885	1
Anp32a	0.00288474	0.721053	0.915	0.846	1
Ddr1	0.00288865	1.13869	0.766	0.5	1
Avpi1	0.00288906	-1.14206	0.489	0.769	1
Rps8	0.00290298	0.415975	1	1	1
Rnf145	0.00291314	2.72208	0.362	0.038	1
Cnn2	0.00291354	1.98393	0.532	0.192	1
Snx12	0.00296051	1.73932	0.511	0.192	1
Nktr	0.00299141	-1.00576	0.511	0.769	1
Ociad1	0.00300621	0.83721	0.851	0.808	1
Tma7	0.00301397	0.532923	1	1	1
Nexn	0.00301397	-0.386695	0.979	1	1
2610507B11Rik	0.00306284	-0.800674	0.362	0.808	1
Pirt	0.00307727	2.06345	0.489	0.154	1
Fbn2	0.00307924	1.08996	0.766	0.731	1
Ubap2l	0.00311347	-0.946345	0.426	0.769	1
Gtf3c4	0.00312684	2.71566	0.34	0.038	1
Slc6a6	0.00313819	-1.68286	0.064	0.346	1
Dynll1	0.00318539	0.751475	0.979	0.885	1
Bod1	0.00318649	-0.94131	0.468	0.731	1
Tbl1xr1	0.00319955	2.25387	0.404	0.077	1
Ppp1r3b	0.00319955	2.05951	0.404	0.077	1
Adipor1	0.00320615	0.810247	0.83	0.692	1
Jup	0.00321171	1.82191	0.574	0.269	1
Ak2	0.00321171	-1.11038	0.34	0.692	1
Zbtb10	0.00321595	-1.53355	0.128	0.462	1
Eif6	0.0032224	-1.27196	0.383	0.654	1
Bcl11a	0.00323414	2.27589	0.447	0.115	1
Plpp3	0.00323774	1.79714	0.638	0.385	1
Apobec2	0.00324289	-0.783005	0.894	1	1
Ckm	0.0032467	0.910187	0.979	0.923	1
Rnf19b	0.00325476	-3.13866	0.021	0.231	1
Cat	0.00328668	2.21416	0.468	0.154	1
Ak1	0.0033166	0.682161	0.851	0.846	1
Prkd3	0.0033212	2.33343	0.426	0.115	1
Lbh	0.00333512	-1.28934	0.532	0.769	1
Sbf2	0.00335341	1.75165	0.489	0.154	1
Fam78a	0.00336537	1.22516	0.745	0.654	1
Glg1	0.00337966	-1.40331	0.489	0.731	1
Tmem41b	0.00340423	-2.46745	0.106	0.385	1
4930453N24Rik	0.0034263	-1.71117	0.255	0.577	1
Cyp51	0.00343223	-1.41596	0.234	0.577	1
Itgb1	0.00346747	-0.671265	0.83	0.962	1
Eef1b2	0.00349773	-0.585729	0.979	1	1
Thoc7	0.00349919	-0.878297	0.596	0.846	1
Slit2	0.00349981	-3.52764	0.021	0.231	1
Arl4c	0.00349981	-3.10756	0.021	0.231	1
Arhgap6	0.00349981	-3.09256	0.021	0.231	1
Kcnb1	0.00352091	-1.42389	0.064	0.346	1
Fam92a	0.00357257	-1.09201	0.468	0.808	1
Esd	0.00359805	-0.61283	0.83	0.962	1
Sdpr	0.00360952	3.49186	0.277	0	1
Bre	0.00360952	3.36142	0.277	0	1
9430016H08Rik	0.00360952	3.34683	0.277	0	1
Whsc1l1	0.00360952	3.2742	0.277	0	1
Fam73a	0.00360952	3.27138	0.277	0	1
Hdgfrp2	0.00360952	3.21666	0.277	0	1
Mfsd1	0.00360952	3.21271	0.277	0	1
Sepn1	0.00360952	3.10647	0.277	0	1
Mccc1	0.00360952	3.05874	0.277	0	1
Tsc1	0.00360952	3.0501	0.277	0	1
Tpm4	0.00360952	2.93346	0.277	0	1
Cops7b	0.00360952	2.90844	0.277	0	1
1810026J23Rik	0.00360952	2.90657	0.277	0	1
Gm10116	0.00360952	2.88627	0.277	0	1
Mlf2	0.00361466	0.787712	0.936	0.846	1
3110040N11Rik	0.00363367	-1.79858	0.128	0.423	1
Rnf166	0.00365337	-1.22561	0.255	0.654	1
Ptpra	0.00365862	1.48963	0.553	0.192	1
Hnrnpa2b1	0.00369612	0.600773	0.979	0.962	1
Dnttip2	0.0037302	-1.13826	0.277	0.615	1
Ipo5	0.00374903	1.31376	0.596	0.192	1
Psmb4	0.00375291	-0.826873	0.745	0.885	1
Trak1	0.0037623	-1.58311	0.17	0.5	1
Cenpb	0.0037799	-0.912345	0.34	0.731	1
Gm8113	0.00378458	2.92034	0.383	0.077	1
Htra1	0.00387527	-0.748014	0.638	0.923	1
Kcnk3	0.00389249	-1.2624	0.255	0.577	1
Grhpr	0.00390247	-1.17187	0.34	0.654	1
Mrps23	0.00391427	-0.735331	0.574	0.885	1
Spin1	0.00392472	1.35997	0.596	0.231	1
Slc38a2	0.00393213	-0.693082	0.681	0.962	1
Vash2	0.0039717	2.51787	0.426	0.115	1
E130308A19Rik	0.0039717	2.34258	0.426	0.115	1
Mdk	0.00400455	1.63109	0.681	0.423	1
Sdc4	0.00402444	-1.60292	0.277	0.577	1
D730003I15Rik	0.00404095	-2.58414	0.021	0.231	1
Nol3	0.00404095	-2.40363	0.021	0.231	1
Gnb2	0.0040483	-0.625481	0.915	1	1
Emc6	0.00406939	-0.784179	0.745	0.923	1
Pgp	0.00408291	-1.10585	0.383	0.692	1
Khdrbs3	0.00408351	-1.24705	0.34	0.692	1
Slc38a4	0.00409205	1.50235	0.681	0.385	1
Obscn	0.00411555	0.783929	0.936	0.885	1
Slc25a11	0.00414566	-0.804953	0.681	0.885	1
Frem2	0.00415355	2.36002	0.383	0.077	1
Ndufv1	0.00416633	-0.535029	0.83	0.962	1
Smim8	0.0041887	-1.18739	0.319	0.654	1
Ndufa8	0.00419114	-0.569023	0.872	1	1
Mdh1	0.00420138	-0.406277	1	1	1
Zfp91	0.00424993	-0.894428	0.468	0.769	1
Calm3	0.00430024	-0.792934	0.681	0.885	1
Ap2a1	0.0043147	-1.23937	0.17	0.5	1
Csde1	0.00432058	0.760311	0.872	0.885	1
Osbpl3	0.00433856	2.27891	0.426	0.115	1
Ggct	0.00433906	-2.9025	0.021	0.231	1
Scx	0.00433906	-2.2588	0.021	0.231	1
Ctsl	0.0043398	-1.06619	0.851	1	1
Gm2000	0.00435002	2.42117	0.383	0.077	1
Nomo1	0.00435002	2.39429	0.383	0.077	1
Cyb5r1	0.00435002	2.34012	0.383	0.077	1
4921524J17Rik	0.00435199	-1.01414	0.404	0.731	1
Hnrnpm	0.00439985	1.30347	0.702	0.385	1
Pls3	0.00441216	-1.92869	0.106	0.385	1
H1f0	0.0044133	1.35146	0.681	0.385	1
Axl	0.00442558	2.78572	0.34	0.038	1
Mhrt	0.00443563	-1.25463	0.234	0.577	1
Uhmk1	0.00450285	3.23718	0.319	0.038	1
Prdx2	0.0045168	-0.505668	0.957	1	1
Lars	0.00453698	-1.27464	0.319	0.654	1
Mdm2	0.00453698	-0.933852	0.298	0.692	1
Smyd1	0.00456726	0.744854	0.872	0.731	1
Trpm7	0.0045769	-1.21983	0.447	0.731	1
Hspa4	0.00458235	-1.19098	0.468	0.769	1
Kctd2	0.00461587	-1.93549	0.085	0.346	1
1700020I14Rik	0.00464471	0.840771	0.894	0.846	1
Impa2	0.00464658	-1.81064	0.128	0.423	1
Sh3pxd2a	0.0046502	1.45573	0.617	0.308	1
Tceal8	0.00465438	1.01021	0.809	0.615	1
Slc16a12	0.00465698	-2.59401	0.021	0.231	1
Id4	0.00465698	-2.44047	0.021	0.231	1
Churc1	0.00467579	-0.747035	0.766	0.962	1
Fign	0.00467767	1.84458	0.511	0.192	1
Rpl13	0.00468291	-0.265613	1	1	1
Dcps	0.00472278	-1.17846	0.17	0.5	1
Sema6d	0.00473267	2.89866	0.319	0.038	1
Pdlim4	0.00474507	-2.73744	0.043	0.269	1
Atp6v1g1	0.00475653	-0.551029	0.894	0.962	1
Snx5	0.00477866	1.59242	0.574	0.269	1
Coq9	0.00480826	1.08862	0.723	0.462	1
Dnajc15	0.00482666	-0.631539	0.83	1	1
Stx8	0.00483182	-0.981533	0.404	0.692	1
Atp5e	0.00485419	-0.308395	1	1	1
Chsy1	0.00486247	1.45598	0.723	0.538	1
Dync1i2	0.00486247	1.00055	0.766	0.462	1
Atraid	0.00493552	-0.659997	0.426	0.769	1
Nrp1	0.00494765	-1.47317	0.277	0.577	1
Gm9493	0.00495157	1.57273	0.532	0.231	1
Kif26b	0.00495488	1.39377	0.596	0.308	1
Agt	0.00499584	-2.15886	0.021	0.231	1
Fbxo40	0.00499584	-2.01837	0.021	0.231	1
Tppp3	0.00505232	-2.68726	0.043	0.269	1
Ints6	0.00505232	-2.67438	0.043	0.269	1
Mpv17	0.00510875	1.55323	0.532	0.269	1
Zfp326	0.00520062	-1.38822	0.426	0.731	1
Mrps7	0.00520062	-0.988274	0.426	0.731	1
Anapc11	0.00520726	0.770734	0.851	0.808	1
Pogz	0.00522443	2.49401	0.319	0.038	1
Wdr20	0.00522443	-1.43265	0.106	0.423	1
Rnpepl1	0.00529916	2.37966	0.404	0.115	1
Ndfip1	0.00529916	-1.49568	0.191	0.5	1
Efr3a	0.00531935	1.41619	0.66	0.346	1
Shox2	0.00534906	2.30394	0.596	0.308	1
Clic1	0.00535982	-0.681881	0.809	1	1
Npnt	0.00537083	2.21196	0.34	0.038	1
Edn1	0.00537744	-2.2382	0.043	0.269	1
Trdn	0.00539509	-0.576545	0.894	1	1
Rpl22l1	0.00540259	0.577277	1	0.962	1
Egln1	0.00542364	-1.034	0.596	0.769	1
Gyg	0.00543966	0.770958	0.894	0.808	1
Myom2	0.00545569	1.56028	0.574	0.231	1
Elovl5	0.00546456	2.00965	0.383	0.077	1
Ccnl1	0.00546531	-0.745761	0.468	0.846	1
Rnaset2a	0.00548722	2.48552	0.319	0.038	1
C530008M17Rik	0.00551362	3.57085	0.255	0	1
Grip1	0.00551362	3.17501	0.255	0	1
Nsun4	0.00551362	3.10291	0.255	0	1
0610009L18Rik	0.00551362	3.08998	0.255	0	1
2700029M09Rik	0.00551362	3.07127	0.255	0	1
Smek1	0.00551362	3.05432	0.255	0	1
C330006A16Rik	0.00551362	2.98462	0.255	0	1
Mettl10	0.00551362	2.95645	0.255	0	1
Foxk1	0.00551362	2.93825	0.255	0	1
Nutf2	0.00551362	2.89894	0.255	0	1
N6amt2	0.00551362	2.81755	0.255	0	1
Ric8	0.00551362	2.74608	0.255	0	1
1110037F02Rik	0.00551362	2.69309	0.255	0	1
Osgep	0.00552121	-1.16096	0.447	0.731	1
Stk24	0.00553593	-1.38021	0.191	0.5	1
Csnk1a1	0.00557691	-0.516333	0.872	0.962	1
Bsg	0.00559709	-0.483294	0.979	1	1
Hnrnpd	0.00563613	-0.72174	0.596	0.885	1
Commd3	0.00563663	-0.714264	0.702	0.846	1
Ifnar2	0.0056586	-2.1073	0.064	0.308	1
Atad2b	0.0056586	-2.08584	0.064	0.308	1
Ctnnd1	0.00567536	1.30818	0.617	0.346	1
Prrx1	0.00572134	-2.06014	0.043	0.269	1
Prpf19	0.00572528	1.2217	0.681	0.385	1
Ppp4c	0.0057822	2.36225	0.404	0.115	1
Hspa13	0.00583032	-1.20741	0.277	0.654	1
Rsbn1	0.0059001	-1.34552	0.17	0.5	1
Acadvl	0.00591137	-0.947261	0.532	0.846	1
Pak1ip1	0.00593276	-1.33032	0.213	0.538	1
March6	0.00594982	1.25347	0.66	0.385	1
Eif2s1	0.00597226	-1.24929	0.34	0.615	1
Tex261	0.00599288	-1.17116	0.383	0.692	1
Rpl6	0.00600633	0.351522	1	1	1
Uqcrh	0.00600633	-0.339988	1	1	1
Arhgap5	0.006015	-0.716966	0.596	0.962	1
Srsf6	0.00601866	1.08279	0.723	0.5	1
Pex19	0.00603745	1.22917	0.596	0.423	1
Mrpl12	0.0060989	-0.58687	0.894	0.962	1
H2afv	0.00615506	-0.722404	0.83	0.923	1
Dennd5a	0.00617721	1.34393	0.596	0.346	1
Tspan3	0.00619837	-0.766898	0.851	1	1
Tnni1	0.00622069	0.376426	1	1	1
Zmym3	0.00625116	1.95034	0.383	0.077	1
Tardbp	0.00625702	1.39273	0.574	0.269	1
Rfk	0.0063046	2.02627	0.404	0.115	1
Vegfd	0.00631659	-3.67089	0	0.154	1
Timm29	0.00631659	-3.45931	0	0.154	1
Washc1	0.00631659	-3.42013	0	0.154	1
Ripor1	0.00631659	-3.3951	0	0.154	1
Il15	0.00631659	-3.35903	0	0.154	1
Fam241a	0.00631659	-3.33425	0	0.154	1
Abcc9	0.00631659	-3.31031	0	0.154	1
Miga2	0.00631659	-3.29314	0	0.154	1
Grk3	0.00631659	-3.28707	0	0.154	1
Gdf15	0.00631659	-3.28003	0	0.154	1
Gm49085	0.00631659	-3.27897	0	0.154	1
Hoxb3	0.00631659	-3.23779	0	0.154	1
Mfap3l	0.00631659	-3.20767	0	0.154	1
Ric8a	0.00631659	-3.18902	0	0.154	1
Cyp4b1	0.00631659	-3.16266	0	0.154	1
Atrip	0.00631659	-3.15359	0	0.154	1
Gjd3	0.00631659	-3.15105	0	0.154	1
T2	0.00631659	-3.12508	0	0.154	1
AC162693.1	0.00631659	-3.12133	0	0.154	1
Zfp90	0.00631659	-3.1172	0	0.154	1
Bend7	0.00631659	-3.0754	0	0.154	1
AC130815.2	0.00631659	-3.05263	0	0.154	1
Taco1	0.00631659	-3.04136	0	0.154	1
Pou3f1	0.00631659	-2.99707	0	0.154	1
Cdh6	0.00631659	-2.99192	0	0.154	1
Irx1	0.00631659	-2.99116	0	0.154	1
Gm15283	0.00631659	-2.97827	0	0.154	1
March3	0.00631659	-2.97436	0	0.154	1
Plpbp	0.00631659	-2.97204	0	0.154	1
Spata33	0.00631659	-2.96056	0	0.154	1
Spindoc	0.00631659	-2.95064	0	0.154	1
Hps5	0.00631659	-2.94393	0	0.154	1
Tdrp	0.00631659	-2.93625	0	0.154	1
Selenoi	0.00631659	-2.93268	0	0.154	1
Riox1	0.00631659	-2.91945	0	0.154	1
Kirrel3	0.00631659	-2.8738	0	0.154	1
Gm33023	0.00631659	-2.87231	0	0.154	1
1810021B22Rik	0.00631659	-2.87184	0	0.154	1
Gon7	0.00631659	-2.84879	0	0.154	1
Kif13b	0.00631659	-2.77317	0	0.154	1
Ablim3	0.00631659	-2.7402	0	0.154	1
Pcnx3	0.00631659	-2.71882	0	0.154	1
Gm42067	0.00631659	-2.65725	0	0.154	1
Lca5l	0.00631659	-2.63332	0	0.154	1
Phactr3	0.00631659	-2.55509	0	0.154	1
Rgs2	0.00631659	-2.49791	0	0.154	1
Bach1	0.00633498	-1.85731	0.064	0.308	1
Ganab	0.00634872	2.30222	0.319	0.038	1
Zbtb20	0.00644191	0.530422	1	1	1
Usp19	0.00645155	1.2092	0.553	0.231	1
Zfp445	0.00646925	-1.90281	0.043	0.269	1
Acat2	0.00646925	-1.86757	0.043	0.269	1
Galnt18	0.00646925	-1.84302	0.043	0.269	1
Rnf207	0.00649842	1.01636	0.766	0.577	1
Cyth2	0.00655921	-1.03172	0.277	0.654	1
Emc9	0.00656228	-1.13285	0.277	0.577	1
Ezr	0.00659566	-0.951809	0.489	0.769	1
Snx7	0.00659643	-1.61102	0.106	0.385	1
Limd2	0.00659995	1.92336	0.447	0.154	1
Ccdc141	0.00660089	0.884974	0.872	0.846	1
Tbcb	0.00660813	-0.690555	0.638	0.962	1
BC005537	0.0066142	1.15892	0.681	0.5	1
Rad21	0.00662475	1.38747	0.66	0.423	1
Hnrnpa0	0.00665151	-0.944977	0.638	0.923	1
Emc7	0.00665151	-0.773733	0.638	0.923	1
Lpp	0.00666356	1.16073	0.681	0.538	1
Tbca	0.00667019	0.485004	0.979	1	1
Ndufc2	0.00667019	-0.38911	0.979	1	1
Samd14	0.00667556	1.79109	0.426	0.115	1
Znrf1	0.00667556	-1.75576	0.213	0.5	1
Ctnnb1	0.00671033	1.08874	0.83	0.769	1
Crem	0.00680694	-1.5507	0.128	0.423	1
Pdk1	0.00683225	1.30201	0.638	0.308	1
Dctn3	0.00683452	-0.629272	0.787	1	1
Serinc3	0.00684348	0.942675	0.809	0.654	1
Gtf2h5	0.00685347	-0.55424	0.83	0.962	1
Gm1673	0.00686509	-1.14761	0.362	0.692	1
Qk	0.00689706	-0.532489	0.894	1	1
1810058I24Rik	0.00689706	-0.479162	0.915	0.962	1
Anxa2	0.00690516	1.11443	0.702	0.5	1
Sox4	0.00690528	-0.746843	0.957	1	1
Snrpd3	0.00694212	-0.724887	0.553	0.808	1
Hint2	0.0069541	-0.667715	0.809	0.962	1
Nsmce4a	0.00696679	-0.859485	0.553	0.846	1
Rab12	0.00696679	-0.78737	0.532	0.885	1
Mettl22	0.00702573	-1.16961	0.17	0.5	1
Nedd9	0.00708328	-1.85392	0.064	0.308	1
Nphp1	0.00708328	-1.85166	0.064	0.308	1
Wrb	0.00710066	3.20957	0.298	0.038	1
Ftsj1	0.00710066	2.62478	0.298	0.038	1
Hmbox1	0.00710066	2.56961	0.298	0.038	1
Tsc22d4	0.00714481	-0.730619	0.766	0.962	1
Psmd13	0.00721682	-0.602935	0.511	0.923	1
Ociad2	0.00722235	1.59821	0.596	0.308	1
Lrpap1	0.00723078	-0.914702	0.574	0.885	1
Dync1li1	0.00723551	-1.02463	0.319	0.654	1
Hspa14	0.00730708	-1.2825	0.213	0.538	1
Rps7	0.0073993	0.305805	1	1	1
Clip4	0.00741209	-0.984037	0.532	0.808	1
Rrp15	0.00742328	-1.62303	0.085	0.346	1
Mfap1b	0.00745577	2.29865	0.298	0.038	1
Ube2a	0.00747761	-0.905689	0.681	0.731	1
Spred1	0.0074786	-1.58792	0.191	0.5	1
Phpt1	0.00753352	1.28236	0.638	0.423	1
Hif3a	0.0075738	1.61896	0.468	0.154	1
Rab13	0.00768458	-1.10652	0.255	0.615	1
Ears2	0.00769654	2.51835	0.362	0.077	1
Vhl	0.00769654	2.29171	0.362	0.077	1
Taok1	0.0077162	1.21735	0.723	0.5	1
Vldlr	0.00774119	0.961251	0.766	0.462	1
Aak1	0.00777445	1.29456	0.596	0.308	1
Rbmxl1	0.00777445	1.25153	0.596	0.308	1
Luc7l	0.00779086	-1.50612	0.17	0.462	1
Dnaja4	0.00780028	-1.17621	0.255	0.577	1
Suds3	0.0078046	1.44251	0.532	0.269	1
Chtf8	0.00782673	2.34497	0.298	0.038	1
Ube3b	0.00788386	2.55865	0.34	0.077	1
Mtch2	0.00792184	0.808036	0.851	0.808	1
Ldha	0.00792429	-0.565147	1	1	1
Tomm40	0.00795376	-0.815901	0.447	0.731	1
Lrrn2	0.00799054	1.91029	0.489	0.231	1
Cav3	0.00802033	-0.961687	0.787	0.885	1
Zfp512b	0.00805784	2.00694	0.319	0.038	1
Tom1l1	0.00806443	1.1766	0.596	0.308	1
Rb1cc1	0.00810391	-1.22599	0.319	0.654	1
Gpr153	0.00811393	1.67769	0.468	0.192	1
Timm13	0.00815767	-0.64494	0.872	0.923	1
Map1a	0.00816501	-1.51341	0.191	0.462	1
Itm2b	0.0081991	-0.4724	1	1	1
Ska2	0.00820308	1.92796	0.447	0.192	1
Asb11	0.00822468	-1.91439	0.17	0.423	1
Cnih4	0.00823681	-0.729912	0.638	0.885	1
Tusc2	0.00824723	2.45284	0.34	0.077	1
Hmgb3	0.00828169	-0.54444	0.681	0.962	1
Pmpcb	0.00830997	-0.658292	0.553	0.923	1
Mical2	0.00832577	1.1545	0.702	0.462	1
Wash1	0.00835493	3.38757	0.234	0	1
Umad1	0.00835493	3.21511	0.234	0	1
Gm21092	0.00835493	3.15443	0.234	0	1
AI987944	0.00835493	3.07475	0.234	0	1
Hiat1	0.00835493	2.97598	0.234	0	1
Frmd4a	0.00835493	2.92973	0.234	0	1
Cntln	0.00835493	2.90521	0.234	0	1
Fam65a	0.00835493	2.88559	0.234	0	1
Pvrl3	0.00835493	2.83767	0.234	0	1
Zfp395	0.00835493	2.83061	0.234	0	1
Thtpa	0.00835493	2.82914	0.234	0	1
Dfna5	0.00835493	2.80146	0.234	0	1
Cav2	0.00835493	2.73817	0.234	0	1
Pddc1	0.00835493	2.70706	0.234	0	1
Ifi30	0.00835493	2.69694	0.234	0	1
Zfp62	0.00835493	2.686	0.234	0	1
Fam177a	0.00835493	2.63683	0.234	0	1
0610011F06Rik	0.00835493	2.5312	0.234	0	1
Wdr1	0.00836406	1.31308	0.596	0.308	1
Art3	0.00836406	-0.996813	0.383	0.692	1
Slc25a16	0.0084078	-0.910541	0.149	0.462	1
Ndufb7	0.00848241	-0.41728	0.979	1	1
Ubl5	0.00848241	-0.40592	0.979	1	1
Armcx4	0.00853494	1.67361	0.468	0.154	1
Tecr	0.00853935	-0.631358	0.745	0.923	1
Acbd6	0.0085424	-1.10708	0.447	0.731	1
Rcn1	0.00859918	1.08673	0.574	0.231	1
Creg1	0.0086056	-1.57302	0.277	0.538	1
Ndrg1	0.00862551	2.28457	0.34	0.077	1
Snd1	0.00862551	2.1015	0.34	0.077	1
Plpp1	0.00862551	-1.54317	0.149	0.423	1
Hspa1b	0.00870195	2.76454	0.383	0.115	1
Uba52	0.00871639	1.10289	0.702	0.538	1
Mrpl33	0.00876352	-0.521805	0.915	0.962	1
Vps13a	0.00882211	-1.71219	0.064	0.308	1
Cttnbp2nl	0.00882211	-1.66628	0.064	0.308	1
Haus8	0.00882211	-1.62987	0.064	0.308	1
Abra	0.00884502	-1.60829	0.191	0.5	1
Hmcn1	0.00884963	-1.65838	0.128	0.385	1
Zeb1	0.00892304	1.593	0.532	0.308	1
Etnk1	0.00892973	1.93521	0.426	0.115	1
Vkorc1	0.00901923	2.24698	0.34	0.077	1
Ube2i	0.00903972	-0.908031	0.574	0.923	1
Chchd2	0.00907542	-0.251894	1	1	1
Dek	0.00907732	-0.939371	0.489	0.769	1
Hbegf	0.00908409	-0.973005	0.319	0.731	1
Gfod1	0.00910346	-1.44898	0.085	0.346	1
Nfe2l1	0.00912813	-0.866834	0.404	0.731	1
Plin2	0.00913276	-1.99937	0.106	0.346	1
Snrnp48	0.00925854	-1.28522	0.17	0.462	1
Tor1a	0.00927101	-1.69308	0.128	0.385	1
Pnrc2	0.00927101	1.45653	0.319	0.038	1
Sap30l	0.00931335	-1.19401	0.277	0.615	1
Atp5j	0.00938558	-0.256149	1	1	1
Pigs	0.00948135	2.32391	0.298	0.038	1
Slc25a19	0.00948135	2.27022	0.298	0.038	1
Tsfm	0.00949175	-1.33567	0.298	0.577	1
Samd4	0.00949851	-0.871566	0.426	0.769	1
Smpx	0.00950177	0.907399	0.851	0.769	1
Purb	0.00967374	-0.597136	0.851	1	1
Ywhae	0.00970517	0.444721	1	1	1
Arl5a	0.00980038	1.21747	0.638	0.308	1
Arpc5l	0.00980885	-0.616047	0.66	0.923	1
Prkag2	0.00982263	1.21122	0.66	0.385	1
Zwint	0.0098258	0.551126	0.851	0.769	1
Chp1	0.00987141	2.1337	0.383	0.115	1
Tet1	0.00987141	1.95459	0.383	0.115	1
Flot1	0.00990077	-0.768527	0.468	0.808	1
Tnpo2	0.00994096	2.19946	0.298	0.038	1
Slc30a4	0.00994096	2.11986	0.298	0.038	1
Srp14	0.00996541	-0.614982	0.83	0.962	1
Rasal2	0.0099856	-1.16381	0.234	0.577	1
Tlcd2	0.0100064	-2.71234	0.021	0.192	1
Cenpv	0.0100064	-2.57676	0.021	0.192	1
Dapk2	0.0100064	-2.55526	0.021	0.192	1
Kif1a	0.0100119	-1.51401	0.191	0.5	1
Cnih1	0.0100342	1.04438	0.745	0.538	1
Ndufs5	0.0100344	-0.348336	1	1	1
Scarb1	0.0100811	2.3677	0.362	0.115	1
Pycard	0.0100884	-1.32088	0.213	0.5	1
Maff	0.010106	-1.30779	0.234	0.5	1
Ube2g1	0.0101878	1.11664	0.638	0.385	1
Pja2	0.0102757	0.626749	0.915	0.769	1
Ddx5	0.0103736	-0.368284	0.979	1	1
Sars	0.010381	1.75337	0.447	0.192	1
Mospd3	0.0104203	2.31267	0.298	0.038	1
Nudt21	0.0104818	1.02504	0.723	0.462	1
Ier3ip1	0.0104882	1.14465	0.66	0.423	1
Tgfb2	0.0104883	-0.659517	0.723	0.885	1
Nxf1	0.0105035	-0.676635	0.766	0.923	1
Flywch1	0.0105784	-1.42801	0.085	0.346	1
Orai1	0.0106446	-1.57458	0.128	0.385	1
Pcgf3	0.0107165	2.00786	0.404	0.154	1
Gm15934	0.0107284	-2.4052	0.021	0.192	1
Rab18	0.0107356	-0.745366	0.574	0.846	1
Unc119	0.0108374	-1.03782	0.404	0.692	1
Cfap20	0.0108374	-1.03373	0.404	0.692	1
Cap2	0.0109097	0.920643	0.723	0.615	1
Psme2	0.0109169	1.12364	0.723	0.577	1
Nit1	0.0109404	-1.02419	0.213	0.538	1
Myoz2	0.0110826	-0.453923	0.979	1	1
Tecpr1	0.0110858	2.73277	0.277	0.038	1
Sec61a2	0.0110858	2.46363	0.277	0.038	1
Adra1b	0.0111051	-1.22121	0.362	0.615	1
Cipc	0.0111789	1.66685	0.383	0.115	1
Epm2aip1	0.0112137	1.66225	0.468	0.154	1
Prdx3	0.0112219	0.646014	0.851	0.769	1
4930402H24Rik	0.0112396	1.7981	0.489	0.231	1
Rcan1	0.0114286	-1.05153	0.362	0.692	1
Elp5	0.0114504	1.27566	0.511	0.192	1
Tnnc1	0.0114531	-0.324214	1	1	1
Itgav	0.0114946	2.57727	0.319	0.077	1
Mospd2	0.0114963	-2.63404	0.021	0.192	1
Ednrb	0.0114963	-2.56637	0.021	0.192	1
Birc3	0.0114963	-2.42692	0.021	0.192	1
Ndufaf6	0.011526	-1.42373	0.064	0.308	1
Laptm4a	0.0115883	0.70179	0.894	0.885	1
Xirp2	0.0116272	-1.52876	0.17	0.423	1
Ndrg3	0.0116287	2.5068	0.277	0.038	1
Ocrl	0.0116287	2.44963	0.277	0.038	1
Slc2a8	0.0116287	2.15891	0.277	0.038	1
Pold4	0.0116287	-1.86598	0.106	0.346	1
Adam33	0.0116477	2.08662	0.383	0.115	1
Prdx6	0.0116914	-0.613584	0.766	1	1
Mocs2	0.0117362	-0.851001	0.532	0.769	1
Ndufa10	0.0118273	-0.53949	0.915	1	1
Med10	0.0118398	-0.866391	0.532	0.846	1
Srsf2	0.0118555	-0.687847	0.723	0.923	1
Ppp2r1a	0.0118619	1.31303	0.787	0.654	1
Orc3	0.0119012	-2.14221	0.064	0.269	1
Mrps26	0.0119313	-0.967567	0.319	0.692	1
Wdr13	0.0120778	2.13637	0.404	0.154	1
Ubap2	0.0121042	-0.90489	0.277	0.615	1
Msl1	0.0121097	1.08559	0.66	0.346	1
Pttg1	0.0121963	-1.37683	0.128	0.385	1
Vim	0.0122595	1.32884	0.66	0.5	1
Rap1b	0.0122595	-0.875184	0.511	0.769	1
Btbd2	0.0123069	1.68528	0.426	0.154	1
Ccdc94	0.0123126	-2.38896	0.021	0.192	1
Oaz2	0.0123896	0.895729	0.766	0.615	1
Rbms1	0.0123896	0.855106	0.745	0.654	1
Vamp2	0.0124051	1.05204	0.702	0.5	1
Ttc19	0.0124288	-1.32279	0.17	0.462	1
H2afy	0.0124415	-0.798858	0.447	0.808	1
Pmp22	0.0124583	-1.00406	0.298	0.615	1
Cdc42ep3	0.0124627	-0.947407	0.617	0.808	1
Tia1	0.0124753	1.13693	0.723	0.577	1
Prrc2c	0.0125352	-0.767835	0.702	0.769	1
Rab5b	0.0125497	1.78809	0.298	0.038	1
Fam217b	0.0125537	2.05925	0.319	0.077	1
Tmem135	0.0125645	1.77756	0.404	0.154	1
Gm15800	0.0125678	3.1782	0.213	0	1
Rtfdc1	0.0125678	2.8667	0.213	0	1
Scap	0.0125678	2.84149	0.213	0	1
Fam234b	0.0125678	2.82463	0.213	0	1
Gipr	0.0125678	2.80218	0.213	0	1
Ppp1r9b	0.0125678	2.76023	0.213	0	1
Phxr4	0.0125678	2.7088	0.213	0	1
Hs1bp3	0.0125678	2.5199	0.213	0	1
Pan2	0.0125678	2.51167	0.213	0	1
Fam134a	0.0125678	2.50669	0.213	0	1
Rapgef3	0.0125678	2.48446	0.213	0	1
Large	0.0125678	2.47767	0.213	0	1
C77370	0.0125678	2.37667	0.213	0	1
Murc	0.0125678	2.35936	0.213	0	1
Tcp11l1	0.0127564	-1.78328	0.128	0.385	1
Fam118a	0.0127856	2.18682	0.277	0.038	1
Arxes1	0.0127918	2.2208	0.34	0.077	1
Rai1	0.0127918	1.73956	0.34	0.077	1
Coro6	0.0128178	1.45864	0.574	0.346	1
Slk	0.0128688	-0.78232	0.489	0.731	1
Grb14	0.0128903	-0.667495	0.532	0.885	1
Zmynd8	0.0129584	1.71185	0.447	0.154	1
Rpl18a	0.013047	0.327956	0.979	1	1
Fbxw5	0.0130581	1.31588	0.447	0.192	1
Nrn1	0.0131799	-2.3134	0.021	0.192	1
Mipol1	0.0131799	-2.14852	0.021	0.192	1
1600014C10Rik	0.0131799	-2.08264	0.021	0.192	1
Wdyhv1	0.0131799	-1.62555	0.021	0.192	1
Sin3a	0.013283	1.76787	0.404	0.115	1
Jph1	0.0133341	-2.71144	0.043	0.231	1
Wfdc1	0.0133341	-2.68864	0.043	0.231	1
Ppwd1	0.0133341	-2.22607	0.043	0.231	1
Eif1ad	0.0133391	-1.41076	0.128	0.385	1
Mrpl18	0.0133567	-0.620323	0.83	0.923	1
Pygl	0.0134014	1.98203	0.277	0.038	1
Cfap43	0.0134014	-1.58625	0.106	0.346	1
Ube2b	0.0134498	-0.485315	0.872	1	1
Hnrnpdl	0.0135061	-0.662006	0.745	0.885	1
Ank	0.0135117	1.57297	0.489	0.231	1
Tbc1d1	0.0135605	-1.09489	0.255	0.538	1
Tnrc6c	0.0136187	-0.866048	0.362	0.692	1
Pias2	0.0137021	1.66523	0.383	0.115	1
Rnf5	0.0137209	1.94049	0.426	0.192	1
Spon1	0.0138672	1.21866	0.66	0.538	1
Gmpr	0.0138695	-0.687133	0.681	0.885	1
Cox6a1	0.0139152	0.534386	0.979	1	1
Enpep	0.0140014	1.54414	0.532	0.269	1
Smtnl2	0.014012	1.52558	0.489	0.231	1
Mob3c	0.0141007	-2.04434	0.021	0.192	1
Rgcc	0.0141007	-2.00144	0.021	0.192	1
Cntn2	0.0141007	-1.8253	0.021	0.192	1
Nr2f6	0.014112	-1.34507	0.277	0.538	1
Ccdc12	0.0141193	0.95352	0.745	0.654	1
Gnai2	0.0142085	-0.867408	0.596	0.846	1
Polr1c	0.0143044	2.03304	0.319	0.077	1
Sdhc	0.0143418	0.621758	0.957	0.846	1
Rab24	0.0143443	-1.13367	0.383	0.654	1
Slitrk5	0.0143462	1.28848	0.596	0.462	1
Trappc6a	0.0143957	-1.18187	0.319	0.577	1
2610001J05Rik	0.014439	1.07506	0.702	0.538	1
Ppib	0.0144852	-0.798412	0.745	0.923	1
Pdcd4	0.0145321	-1.31408	0.149	0.423	1
Commd6	0.0146058	-0.89385	0.426	0.731	1
Sema5a	0.0146432	2.18505	0.362	0.115	1
Usp3	0.0146432	-1.01081	0.17	0.462	1
Mt1	0.014697	-0.798175	0.553	0.885	1
Guk1	0.0146972	-0.694197	0.553	0.846	1
Rap1a	0.0147104	-0.850108	0.489	0.731	1
Gm9844	0.0147121	2.06116	0.277	0.038	1
Tet2	0.0147461	1.49014	0.532	0.308	1
Gm13889	0.0148395	-1.90326	0.085	0.308	1
Cog8	0.0148445	1.70827	0.383	0.115	1
Parvb	0.0148468	1.56431	0.553	0.346	1
Hsd17b7	0.015006	-2.34512	0.043	0.231	1
Sc5d	0.015006	-2.32825	0.043	0.231	1
Snx32	0.015006	-2.23516	0.043	0.231	1
Pdcd10	0.0150228	-0.655013	0.298	0.692	1
Tmem160	0.0150272	-0.711845	0.766	0.923	1
Sacm1l	0.0152485	1.99776	0.362	0.115	1
Pigt	0.0152485	1.77923	0.362	0.115	1
Eif5a	0.0153093	-0.519828	0.936	1	1
Uqcrc1	0.0153124	0.543055	0.957	1	1
Kpna4	0.0153382	-0.554097	0.426	0.769	1
Phldb1	0.0154089	1.92114	0.277	0.038	1
Rnd3	0.0154606	-1.18802	0.319	0.577	1
Ptgfrn	0.01547	1.29927	0.553	0.308	1
Asna1	0.0154719	1.36769	0.468	0.192	1
Igsf3	0.0154719	1.35226	0.468	0.192	1
Trps1	0.015588	2.22892	0.319	0.077	1
Psmc5	0.0156818	-0.899658	0.596	0.769	1
Cdv3	0.0156877	-0.420425	0.723	0.962	1
Cmss1	0.0157473	-1.71454	0.128	0.346	1
Gstp1	0.0157488	-0.896555	0.404	0.654	1
Tmem258	0.0157608	0.592137	0.915	0.885	1
Wapl	0.0158006	-0.756102	0.447	0.769	1
Abhd18	0.0158053	1.92035	0.34	0.077	1
Ndst1	0.0158053	1.76617	0.34	0.077	1
Tmem245	0.0158659	1.94891	0.404	0.154	1
Bmp7	0.0158659	1.64812	0.404	0.154	1
Igf1r	0.0158812	1.35276	0.617	0.385	1
Gnb4	0.0160701	1.54203	0.383	0.115	1
Lmo7	0.0161312	-0.542962	0.766	1	1
Rpl10-ps3	0.0161805	1.43135	0.489	0.231	1
Anxa6	0.016192	0.765875	0.809	0.808	1
Mettl9	0.0161954	-0.859819	0.553	0.846	1
Etv1	0.0162249	-1.53223	0.17	0.423	1
Tnks	0.016267	-1.48325	0.149	0.385	1
Nedd4	0.0163117	0.406384	0.957	1	1
Coq2	0.016331	-1.19107	0.255	0.538	1
Klf10	0.0163693	-2.00237	0.085	0.308	1
Polr2l	0.0163879	-0.691116	0.468	0.808	1
Fndc3a	0.0164209	-1.95387	0.064	0.269	1
Hsd17b11	0.0164209	-1.78757	0.064	0.269	1
Ntf3	0.0164209	-1.74247	0.064	0.269	1
Mlx	0.0164779	-1.23782	0.149	0.423	1
Efnb1	0.0165254	1.91528	0.362	0.115	1
Ncln	0.0165254	1.73059	0.362	0.115	1
Filip1l	0.0165254	-1.5107	0.191	0.423	1
Dram2	0.0165567	1.8176	0.426	0.192	1
Foxred1	0.0166196	-1.36914	0.128	0.385	1
Tpr	0.0166479	-0.57474	0.83	0.885	1
Rasgef1b	0.0168047	-1.40723	0.213	0.462	1
Sort1	0.0168857	1.73467	0.468	0.231	1
Ptpn1	0.0168996	-1.88398	0.17	0.423	1
As3mt	0.016955	-1.00141	0.319	0.615	1
Dhx30	0.016955	0.868383	0.532	0.231	1
Rab11b	0.0169773	0.73223	0.83	0.769	1
Pkd2	0.0171441	2.43203	0.255	0.038	1
Lifr	0.0171441	2.40156	0.255	0.038	1
Gtf2e1	0.0171441	2.39235	0.255	0.038	1
Gm20342	0.0171441	2.39218	0.255	0.038	1
Esrrg	0.0171441	2.37954	0.255	0.038	1
BC005561	0.0171819	-0.838648	0.255	0.5	1
Pptc7	0.0171879	1.43644	0.489	0.269	1
Ube3c	0.0171984	2.01259	0.362	0.115	1
Creb1	0.0171984	1.74207	0.362	0.115	1
Fosl2	0.0172148	-1.96561	0.128	0.346	1
Nfkbiz	0.0173055	-1.93283	0.064	0.269	1
Heca	0.0173055	-1.76841	0.064	0.269	1
Tbc1d15	0.0173548	-1.17007	0.128	0.385	1
Rps3	0.0173688	0.348943	1	1	1
Prickle1	0.0174653	1.94785	0.383	0.154	1
Pmm1	0.0174653	-1.0197	0.191	0.5	1
Pdk3	0.0175018	0.953863	0.617	0.308	1
Wasl	0.0175547	-0.904916	0.319	0.615	1
Zfp706	0.0175686	-0.692806	0.851	0.962	1
Zyx	0.0175731	0.875257	0.723	0.731	1
Glrx2	0.0176106	-0.813429	0.489	0.808	1
Cbx4	0.0177034	-1.32549	0.149	0.385	1
Unc45b	0.0177249	0.49635	0.872	0.808	1
Cmas	0.0177862	1.59347	0.404	0.154	1
Oxct1	0.0177871	1.04054	0.766	0.538	1
Eif3g	0.0178109	0.968676	0.723	0.5	1
Rpl29	0.0178614	-0.816855	0.34	0.577	1
Hcfc1r1	0.0178695	-0.480159	0.851	1	1
Mrpl34	0.0178738	-0.634752	0.702	0.923	1
Uqcrc2	0.0179013	-0.581091	0.894	1	1
Fam69b	0.0179655	2.12828	0.255	0.038	1
Wipf2	0.0179655	2.10871	0.255	0.038	1
Bloc1s1	0.0179952	-0.752049	0.277	0.615	1
Lamc1	0.0180136	1.344	0.617	0.462	1
Ccdc59	0.0180752	-1.88236	0.213	0.423	1
Adgra2	0.0181184	2.29113	0.298	0.077	1
Rgs3	0.0181184	-1.47047	0.128	0.385	1
Dusp28	0.0182316	-1.62008	0.064	0.269	1
Isoc1	0.0182806	-0.803775	0.511	0.808	1
Phb	0.0182806	-0.802098	0.553	0.731	1
Lypla1	0.0183429	1.2249	0.553	0.308	1
Dazap2	0.018358	1.03229	0.723	0.615	1
Cebpzos	0.0183948	-0.901257	0.383	0.731	1
Nufip2	0.0184314	-1.25951	0.34	0.538	1
Dcun1d1	0.0184624	1.73811	0.319	0.077	1
1810013L24Rik	0.0184624	-1.46992	0.149	0.385	1
Btg2	0.0184647	-0.609209	0.681	0.885	1
Tial1	0.018491	1.17022	0.532	0.269	1
Bcl7a	0.0184948	1.46282	0.426	0.192	1
Prdx4	0.0185969	0.647848	0.809	0.615	1
Cited4	0.0186168	-0.871003	0.17	0.462	1
Crip1	0.0186262	-1.28287	0.404	0.654	1
Sltm	0.0186855	-0.999104	0.447	0.731	1
Capza1	0.018778	1.08649	0.638	0.538	1
Hectd1	0.018778	-0.908284	0.532	0.731	1
Naaladl2	0.0187812	3.12747	0.191	0	1
Fabp3-ps1	0.0187812	2.95975	0.191	0	1
Pfkfb2	0.0187812	2.91485	0.191	0	1
Lnp	0.0187812	2.9004	0.191	0	1
Dpcd	0.0187812	2.87423	0.191	0	1
Pelo	0.0187812	2.83012	0.191	0	1
Gm15440	0.0187812	2.77685	0.191	0	1
Commd5	0.0187812	2.76964	0.191	0	1
Mthfs	0.0187812	2.75057	0.191	0	1
Fam110c	0.0187812	2.74466	0.191	0	1
Zfp788	0.0187812	2.70634	0.191	0	1
Ndc1	0.0187812	2.63571	0.191	0	1
Mtx3	0.0187812	2.62229	0.191	0	1
BC029214	0.0187812	2.57112	0.191	0	1
Fam160b2	0.0187812	2.56104	0.191	0	1
E430025E21Rik	0.0187812	2.55869	0.191	0	1
Trim25	0.0187812	2.5428	0.191	0	1
Rpl36-ps3	0.0187812	2.54231	0.191	0	1
Fam132a	0.0187812	2.5093	0.191	0	1
Suv420h2	0.0187812	2.49327	0.191	0	1
Ctage5	0.0187812	2.48616	0.191	0	1
Taf4a	0.0187812	2.475	0.191	0	1
Pex5	0.0187812	2.45337	0.191	0	1
Tceb3	0.0187812	2.43267	0.191	0	1
Slc25a38	0.0187812	2.41922	0.191	0	1
Rgp1	0.0187812	2.41694	0.191	0	1
Nat14	0.0187812	2.41291	0.191	0	1
Cyp39a1	0.0187812	2.40716	0.191	0	1
Adck3	0.0187812	2.37883	0.191	0	1
Hap1	0.0187812	2.36853	0.191	0	1
Wbscr22	0.0187812	2.34799	0.191	0	1
Sufu	0.0187812	2.34133	0.191	0	1
Fam134c	0.0187812	2.32842	0.191	0	1
Aco1	0.0187812	2.32579	0.191	0	1
Tars2	0.0187812	2.30822	0.191	0	1
Ndnl2	0.0187812	2.28528	0.191	0	1
Pcnxl3	0.0187812	2.27149	0.191	0	1
Trappc3	0.01881	-0.996542	0.319	0.615	1
Rnf44	0.018821	2.18809	0.255	0.038	1
Mier3	0.018821	2.12643	0.255	0.038	1
Mast4	0.0188626	0.74068	0.894	0.769	1
Hras	0.0188876	-0.856278	0.596	0.885	1
Homer1	0.0189113	2.04875	0.298	0.077	1
Psmd12	0.019024	-0.638233	0.702	0.923	1
Cavin2	0.0190566	-3.9634	0	0.115	1
B230307C23Rik	0.0190566	-3.17927	0	0.115	1
4933408B17Rik	0.0190566	-3.00642	0	0.115	1
Gm46404	0.0190566	-3.00479	0	0.115	1
E130307A14Rik	0.0190566	-2.98093	0	0.115	1
Sybu	0.0190566	-2.96706	0	0.115	1
Washc4	0.0190566	-2.9584	0	0.115	1
C1qtnf12	0.0190566	-2.93933	0	0.115	1
Upp1	0.0190566	-2.91558	0	0.115	1
Nexmif	0.0190566	-2.89339	0	0.115	1
Icam1	0.0190566	-2.87419	0	0.115	1
Mindy1	0.0190566	-2.8669	0	0.115	1
Gm15972	0.0190566	-2.8655	0	0.115	1
Syn3	0.0190566	-2.84793	0	0.115	1
Matn4	0.0190566	-2.84068	0	0.115	1
Gm26669	0.0190566	-2.82998	0	0.115	1
Riok2	0.0190566	-2.82998	0	0.115	1
Alpl	0.0190566	-2.82583	0	0.115	1
Wdr60	0.0190566	-2.81871	0	0.115	1
Kcnj11	0.0190566	-2.80266	0	0.115	1
Prcd	0.0190566	-2.79616	0	0.115	1
Zfp995	0.0190566	-2.78038	0	0.115	1
Zfp992	0.0190566	-2.77459	0	0.115	1
Slc25a30	0.0190566	-2.72251	0	0.115	1
Gm49077	0.0190566	-2.72233	0	0.115	1
Tcim	0.0190566	-2.71851	0	0.115	1
D830005E20Rik	0.0190566	-2.71726	0	0.115	1
Cenps	0.0190566	-2.71559	0	0.115	1
Rcc1l	0.0190566	-2.70076	0	0.115	1
H2-D1	0.0190566	-2.69975	0	0.115	1
C030006K11Rik	0.0190566	-2.69634	0	0.115	1
Dynlt1b	0.0190566	-2.69033	0	0.115	1
Ctsk	0.0190566	-2.68845	0	0.115	1
Sergef	0.0190566	-2.67589	0	0.115	1
Zfp934	0.0190566	-2.66971	0	0.115	1
Tmem250-ps	0.0190566	-2.66251	0	0.115	1
Nemp1	0.0190566	-2.64515	0	0.115	1
Nfatc2ip	0.0190566	-2.64035	0	0.115	1
Wdr53	0.0190566	-2.63183	0	0.115	1
AC110166.1	0.0190566	-2.6217	0	0.115	1
Ccnb1ip1	0.0190566	-2.61835	0	0.115	1
Hcn2	0.0190566	-2.61423	0	0.115	1
Ulk4	0.0190566	-2.61262	0	0.115	1
Kat14	0.0190566	-2.60968	0	0.115	1
Gm30108	0.0190566	-2.60781	0	0.115	1
Fam35a	0.0190566	-2.59924	0	0.115	1
4930523C07Rik	0.0190566	-2.58985	0	0.115	1
Atn1	0.0190566	-2.58944	0	0.115	1
Rida	0.0190566	-2.58878	0	0.115	1
1810055G02Rik	0.0190566	-2.58311	0	0.115	1
Gm44777	0.0190566	-2.56321	0	0.115	1
1810032O08Rik	0.0190566	-2.56321	0	0.115	1
Mfsd14b	0.0190566	-2.55455	0	0.115	1
Zfp869	0.0190566	-2.55232	0	0.115	1
Lipo3	0.0190566	-2.54748	0	0.115	1
Gm15627	0.0190566	-2.54318	0	0.115	1
Gpam	0.0190566	-2.53228	0	0.115	1
Togaram2	0.0190566	-2.52254	0	0.115	1
Ldlrap1	0.0190566	-2.51422	0	0.115	1
Tmem185a	0.0190566	-2.51186	0	0.115	1
4930503L19Rik	0.0190566	-2.49783	0	0.115	1
Gm32352	0.0190566	-2.47687	0	0.115	1
Klf5	0.0190566	-2.47552	0	0.115	1
Kif5c	0.0190566	-2.46875	0	0.115	1
Selenon	0.0190566	-2.46536	0	0.115	1
Rad18	0.0190566	-2.46467	0	0.115	1
5730480H06Rik	0.0190566	-2.46253	0	0.115	1
Gm20300	0.0190566	-2.44324	0	0.115	1
Mkln1os	0.0190566	-2.42807	0	0.115	1
Phf7	0.0190566	-2.42755	0	0.115	1
Gm31251	0.0190566	-2.40275	0	0.115	1
Gramd1b	0.0190566	-2.36097	0	0.115	1
Perm1	0.0190566	-2.35154	0	0.115	1
Igip	0.0190566	-2.33531	0	0.115	1
Gm39469	0.0190566	-2.33353	0	0.115	1
Gm17315	0.0190566	-2.32729	0	0.115	1
Art1	0.0190566	-2.30678	0	0.115	1
Gmeb2	0.0190566	-2.29432	0	0.115	1
Lmo1	0.0190566	-2.2911	0	0.115	1
Rnd1	0.0190566	-2.27768	0	0.115	1
Tdrkh	0.0190566	-2.26261	0	0.115	1
Washc5	0.0190566	-2.20561	0	0.115	1
Zfp112	0.0190566	-2.17286	0	0.115	1
Garem1	0.0190566	-2.16356	0	0.115	1
Sned1	0.0190566	-2.14011	0	0.115	1
Stn1	0.0190566	-2.12845	0	0.115	1
Miga1	0.0190566	-2.11885	0	0.115	1
Insc	0.0190566	-2.09602	0	0.115	1
Hspa5	0.0190646	-0.687817	0.957	1	1
Ago1	0.0190734	1.88511	0.34	0.115	1
Larp1b	0.0192497	-1.60078	0.149	0.385	1
Ctgf	0.019254	-1.41154	0.404	0.654	1
Fos	0.0193057	-0.739841	0.638	0.885	1
Eef1d	0.0193292	-0.485685	0.894	0.962	1
Mlip	0.0194549	0.671653	0.894	0.769	1
C130080G10Rik	0.0194881	-0.834356	0.638	0.808	1
Leng1	0.0195855	-0.983735	0.213	0.462	1
Dnajc27	0.019712	2.306	0.255	0.038	1
Plekha6	0.019712	2.26966	0.255	0.038	1
Slc6a13	0.0198494	-1.60034	0.085	0.308	1
Fgfr1	0.0198494	-1.424	0.085	0.308	1
9030624J02Rik	0.0199101	-1.29948	0.191	0.462	1
Pds5a	0.019911	1.37839	0.468	0.192	1
Hnrnpul1	0.0199859	1.41476	0.489	0.231	1
Lama4	0.0200001	1.26489	0.596	0.385	1
Arl8b	0.0200001	1.23775	0.596	0.385	1
Ttc3	0.0201059	-0.559353	0.638	1	1
Mpg	0.0201712	-2.01512	0.106	0.308	1
Cttn	0.0202823	1.20394	0.574	0.269	1
Acsl1	0.0204891	-1.21124	0.34	0.577	1
Ppp1r1b	0.0206397	2.56446	0.255	0.038	1
Sgk3	0.0206397	1.94952	0.255	0.038	1
Atp8a1	0.020655	1.81453	0.34	0.115	1
Stmn1	0.0207391	0.853138	0.766	0.577	1
Laptm4b	0.0207885	1.24449	0.553	0.346	1
Prdm2	0.0208144	-1.14309	0.085	0.308	1
Sec61g	0.0209054	0.399532	1	0.962	1
Cox7a2l	0.0209054	-0.286695	1	1	1
Pex14	0.0209128	-1.4785	0.149	0.385	1
Ciapin1	0.0209788	-1.00249	0.426	0.731	1
Parva	0.0209955	1.72759	0.447	0.231	1
Arf6	0.0210045	1.13084	0.447	0.154	1
Vcl	0.021023	1.19853	0.638	0.462	1
Fkbp9	0.021023	0.814949	0.66	0.423	1
Macf1	0.0210534	-0.659635	0.681	0.846	1
Snhg12	0.0210662	-0.904242	0.149	0.423	1
Chrac1	0.0210951	-0.644199	0.787	0.846	1
Nme7	0.0211176	-2.05488	0.106	0.308	1
Ankrd10	0.0211755	1.7662	0.511	0.308	1
Ccdc112	0.0212753	-1.34651	0.064	0.269	1
Chchd7	0.021386	-0.539197	0.787	1	1
Strn4	0.0214411	1.70691	0.404	0.154	1
Dnaja1	0.0214675	-0.700003	0.83	1	1
Tmbim1	0.0214932	-1.12225	0.191	0.462	1
Atp2a2	0.0215521	0.435178	0.979	1	1
Cited1	0.0216163	-1.34973	0.298	0.538	1
Tmem208	0.0216635	-0.784822	0.426	0.731	1
Ncoa2	0.0217467	1.49483	0.447	0.231	1
Hspb3	0.0217493	-0.717898	0.745	0.923	1
Borcs8	0.0217889	-0.976446	0.298	0.577	1
Tmem57	0.0217889	-0.875129	0.298	0.577	1
Wsb1	0.0218118	-1.35138	0.383	0.577	1
Slc41a3	0.02182	-1.36349	0.085	0.308	1
Dok7	0.0221678	1.58157	0.426	0.192	1
Dnajb11	0.0222122	-0.868885	0.489	0.769	1
Hspa1a	0.0222975	2.17381	0.489	0.308	1
Maf	0.0223497	2.18542	0.34	0.115	1
Fam160b1	0.0223601	-1.52712	0.128	0.346	1
Gcsh	0.0223786	-0.879869	0.277	0.577	1
Pmepa1	0.0223953	-0.775342	0.468	0.769	1
Ppil4	0.0225212	-1.18544	0.277	0.538	1
Adamts7	0.0226096	1.92478	0.255	0.038	1
Inafm2	0.0226998	1.58699	0.319	0.077	1
Nrap	0.022727	-0.805351	0.447	0.692	1
Pea15a	0.0227564	1.17889	0.574	0.423	1
Haus1	0.0227602	-1.32612	0.213	0.462	1
Bag1	0.0229424	-0.63225	0.809	0.885	1
Prdx5	0.0229424	-0.603656	0.809	0.885	1
Eno1	0.022999	0.86588	0.809	0.769	1
Rhobtb3	0.0231847	-1.15679	0.191	0.462	1
Phf21a	0.0232415	1.91459	0.34	0.115	1
Nlrp10	0.023345	2.33913	0.298	0.077	1
Tbcd	0.0233471	1.78701	0.298	0.077	1
St13	0.0234692	0.581084	0.915	0.808	1
Tmem242	0.0234951	1.04904	0.596	0.385	1
Gramd1a	0.0235035	1.54058	0.362	0.115	1
Mical3	0.0235106	1.04006	0.681	0.5	1
Trappc2l	0.0235319	-0.566921	0.574	0.885	1
Hmg20b	0.0235855	-0.6316	0.596	0.808	1
Rnf111	0.023642	-1.5926	0.149	0.385	1
Ephx2	0.023642	-1.52096	0.149	0.385	1
Fam32a	0.023692	1.28097	0.553	0.346	1
Ptges3l	0.023692	-0.815698	0.383	0.654	1
Lix1l	0.0238058	1.48548	0.426	0.192	1
Smim4	0.0239132	-0.763517	0.362	0.654	1
Yipf7	0.0239588	-1.21615	0.085	0.308	1
Dnaja3	0.0239736	-1.18476	0.298	0.538	1
Tubb2b	0.0241354	1.4294	0.426	0.154	1
Gng12	0.0243353	2.06104	0.298	0.077	1
Gtpbp2	0.0243353	2.05757	0.298	0.077	1
Rbbp9	0.0243353	1.93181	0.298	0.077	1
Fzd1	0.0243353	1.82232	0.298	0.077	1
Kdm6a	0.0243499	-1.4217	0.128	0.346	1
Tomm40l	0.0244179	1.48073	0.362	0.115	1
Mrpl9	0.0245089	-1.30849	0.213	0.462	1
Mtch1	0.0246717	-0.694412	0.936	0.962	1
Prkab2	0.0247411	2.08094	0.255	0.038	1
Natd1	0.0247411	1.79115	0.255	0.038	1
Taf10	0.0248098	-0.570011	0.617	0.885	1
Tmbim6	0.0248829	0.736118	0.787	0.731	1
Rnh1	0.0249081	-0.827236	0.511	0.769	1
Smad4	0.0249904	-1.46279	0.277	0.538	1
Gsta4	0.0249908	-0.8062	0.447	0.692	1
Crebrf	0.0250147	-0.879615	0.234	0.5	1
Extl3	0.0250515	1.04807	0.511	0.231	1
2410015M20Rik	0.0250539	-0.408691	0.979	1	1
Nkd1	0.0251182	1.94196	0.34	0.115	1
Ccdc86	0.0251182	-1.31423	0.17	0.423	1
Immt	0.0252432	-0.447461	0.809	0.962	1
Amotl1	0.0252714	1.34466	0.553	0.346	1
Tusc3	0.0252917	-1.13821	0.362	0.615	1
Mrpl37	0.0253597	2.01118	0.298	0.077	1
Bhlhe40	0.0253597	-1.14008	0.128	0.385	1
Ppp1r12c	0.0253597	-1.04143	0.128	0.385	1
Nacc2	0.025363	1.6514	0.362	0.115	1
Tmem164	0.025363	1.61073	0.362	0.115	1
Paip1	0.025363	-1.34235	0.191	0.423	1
Usp9x	0.025375	1.25694	0.638	0.462	1
Tpm2	0.0253928	1.22739	0.489	0.231	1
Txnrd2	0.0254011	-1.47124	0.128	0.346	1
Fbxl15	0.0254011	-1.43602	0.128	0.346	1
Tlk2	0.0254261	-1.53993	0.213	0.462	1
Wbp4	0.0255163	-0.960293	0.383	0.615	1
Chd2	0.0256802	-0.79778	0.404	0.615	1
Sarnp	0.025686	1.01552	0.66	0.5	1
Sdhaf4	0.025686	-0.631434	0.489	0.808	1
Exosc10	0.0257033	1.95521	0.319	0.115	1
Zswim8	0.0257033	-1.3764	0.17	0.385	1
H2afz	0.0258093	-0.397475	0.957	1	1
Tmem201	0.0258705	1.83951	0.255	0.038	1
Erlin1	0.0258705	1.81852	0.255	0.038	1
Naa25	0.0258705	1.70415	0.255	0.038	1
Efna5	0.0258705	1.62306	0.255	0.038	1
Arpc1a	0.0258729	-0.644149	0.532	0.885	1
Ecsit	0.0259039	1.18164	0.511	0.269	1
Sptb	0.0259781	1.93812	0.426	0.231	1
Abcf2	0.0261048	-1.315	0.17	0.423	1
Lmna	0.0261714	-0.920848	0.532	0.654	1
Kpnb1	0.0262492	1.12717	0.596	0.346	1
Guf1	0.026277	2.61851	0.234	0.038	1
Tns3	0.026277	2.49478	0.234	0.038	1
Igfbpl1	0.026277	2.49293	0.234	0.038	1
Gcnt1	0.026277	2.4421	0.234	0.038	1
Igf2bp1	0.026277	2.3195	0.234	0.038	1
Adarb1	0.026277	2.28479	0.234	0.038	1
Hira	0.026277	2.213	0.234	0.038	1
Xbp1	0.0263397	-0.950965	0.17	0.462	1
Adam17	0.0263543	-1.73138	0.085	0.269	1
Nck1	0.0264595	-1.10227	0.255	0.5	1
Acads	0.0264848	-0.695956	0.532	0.731	1
Kxd1	0.0266301	-0.962145	0.638	0.731	1
Hdac2	0.026631	0.776387	0.809	0.654	1
Pgm5	0.0266665	1.09795	0.574	0.385	1
Hsdl2	0.0266665	-1.04811	0.447	0.615	1
Anp32b	0.0267187	-0.521061	0.745	0.885	1
Vps54	0.02673	1.85079	0.319	0.115	1
Mark4	0.02673	1.79813	0.319	0.115	1
Alkbh3	0.02673	-1.60024	0.17	0.385	1
Strip2	0.0267688	1.18553	0.638	0.423	1
Casq1	0.0268255	1.47404	0.766	0.692	1
Bcl7c	0.0269894	-0.722144	0.468	0.769	1
Cramp1l	0.0270444	1.59091	0.255	0.038	1
Nsa2	0.0271856	0.639264	0.915	0.769	1
Sspn	0.0272139	0.821848	0.809	0.692	1
Oat	0.0272737	0.769335	0.723	0.654	1
Dnajc4	0.0273486	-1.32477	0.191	0.423	1
Rps13	0.0273831	-0.247684	1	1	1
Zbtb8os	0.0274613	-0.782804	0.255	0.615	1
Ssh1	0.0275071	2.13054	0.234	0.038	1
Rbm14	0.0275071	1.99051	0.234	0.038	1
Mdm4	0.0275207	1.83	0.298	0.077	1
Bpgm	0.0276218	-1.49065	0.128	0.346	1
Ap2b1	0.0276906	1.3854	0.447	0.231	1
Enpp1	0.0279085	2.86084	0.17	0	1
Dnajc16	0.0279085	2.836	0.17	0	1
Wrap73	0.0279085	2.73693	0.17	0	1
Hba-a2	0.0279085	2.67333	0.17	0	1
Ddx26b	0.0279085	2.6722	0.17	0	1
Trmt2a	0.0279085	2.65012	0.17	0	1
Nck2	0.0279085	2.59354	0.17	0	1
Pigu	0.0279085	2.55335	0.17	0	1
Ept1	0.0279085	2.55103	0.17	0	1
Ldoc1l	0.0279085	2.54435	0.17	0	1
Pvrl2	0.0279085	2.54416	0.17	0	1
Bahcc1	0.0279085	2.53629	0.17	0	1
D430019H16Rik	0.0279085	2.51951	0.17	0	1
Cers6	0.0279085	2.51105	0.17	0	1
Gm10110	0.0279085	2.4652	0.17	0	1
Dync2li1	0.0279085	2.46134	0.17	0	1
Gm13251	0.0279085	2.44749	0.17	0	1
Pigm	0.0279085	2.39648	0.17	0	1
Lace1	0.0279085	2.38199	0.17	0	1
Vstm4	0.0279085	2.35928	0.17	0	1
Fbxo7	0.0279085	2.29817	0.17	0	1
Nudt11	0.0279085	2.28701	0.17	0	1
Tbc1d24	0.0279085	2.28031	0.17	0	1
Fntb	0.0279085	2.26868	0.17	0	1
Slc24a3	0.0279085	2.25825	0.17	0	1
Trappc8	0.0279085	2.18804	0.17	0	1
D230025D16Rik	0.0279085	2.15125	0.17	0	1
Adck4	0.0279085	2.12308	0.17	0	1
Tmppe	0.0279085	2.08109	0.17	0	1
Rbm12	0.0279085	2.00899	0.17	0	1
B3glct	0.0279085	2.00113	0.17	0	1
Ube2s	0.0280316	-0.760259	0.723	0.846	1
Gabarap	0.0281951	-0.37021	0.936	1	1
Eef1a1	0.0282	0.380538	1	1	1
Gamt	0.0282025	2.17279	0.277	0.077	1
Wbp1	0.0283112	1.23905	0.617	0.385	1
Smc1a	0.0283673	-1.16481	0.255	0.5	1
Abhd8	0.0283987	-0.809826	0.298	0.538	1
Srl	0.0285875	0.686588	0.872	0.731	1
Npc1	0.0286004	1.15126	0.489	0.269	1
Tmem14c	0.028617	-0.74717	0.723	0.885	1
Ubqln4	0.0286595	1.9492	0.298	0.077	1
Tmem33	0.0287784	1.16401	0.532	0.308	1
Usp50	0.0288025	1.64692	0.426	0.231	1
Zfpm1	0.028815	-1.02122	0.234	0.5	1
Mtfr1	0.0288912	-1.54732	0.106	0.308	1
Tle4	0.0288912	-1.50751	0.106	0.308	1
Mbtd1	0.0289051	1.03536	0.617	0.462	1
Sgk1	0.028967	-2.26997	0.085	0.269	1
Map7d1	0.0291904	-0.47045	0.511	0.885	1
2810001G20Rik	0.0294669	-1.1157	0.191	0.423	1
Slc30a1	0.0295304	1.3758	0.255	0.038	1
Exoc4	0.0295525	0.97945	0.511	0.231	1
Ier5	0.0296753	-0.922825	0.66	0.808	1
Ubc	0.0297895	-0.551272	0.83	1	1
Ccnd3	0.0298261	0.470745	0.915	0.885	1
Gpr180	0.0299206	-0.890242	0.106	0.346	1
Sec13	0.0299362	1.04823	0.553	0.308	1
Map7	0.029982	-2.54888	0.021	0.154	1
Man2b1	0.029982	-2.4326	0.021	0.154	1
Ptges	0.029982	-2.33027	0.021	0.154	1
Robo1	0.030008	-1.1078	0.128	0.346	1
Rnf141	0.0300251	1.97824	0.319	0.115	1
Stk40	0.0300386	-1.24033	0.149	0.385	1
Med31	0.0300469	-1.08627	0.191	0.462	1
Cpsf7	0.0301169	1.92343	0.234	0.038	1
Gm11789	0.0301349	-2.48839	0.064	0.231	1
Tceal6	0.0301349	-2.08107	0.064	0.231	1
Taf1b	0.0301818	-1.66978	0.106	0.308	1
Sema3c	0.0301818	-1.58265	0.106	0.308	1
Crk	0.0301897	1.14128	0.574	0.423	1
Kiz	0.0303933	-1.00949	0.17	0.423	1
Ercc1	0.0303933	-0.84222	0.17	0.423	1
U2af1	0.0304477	-0.500276	0.532	0.769	1
Pigyl	0.0304885	1.40482	0.468	0.269	1
D10Jhu81e	0.030524	0.710238	0.702	0.538	1
Pcnp	0.0305613	-0.654026	0.638	0.846	1
Hspa9	0.0306231	0.576766	0.894	0.846	1
Gatsl2	0.0306315	2.29143	0.277	0.077	1
Ruvbl2	0.0306315	2.00843	0.277	0.077	1
Gtf3a	0.0306387	-1.16731	0.277	0.538	1
Keap1	0.0308291	-0.942715	0.255	0.538	1
6330403K07Rik	0.0309616	0.938672	0.702	0.577	1
Insr	0.0309873	1.42153	0.489	0.308	1
Tfb2m	0.0310594	-1.44781	0.149	0.346	1
Atp11b	0.0310594	-0.637093	0.128	0.385	1
Txn1	0.0311159	-0.678908	0.851	0.962	1
Sys1	0.031132	-0.977509	0.447	0.654	1
Magi1	0.0311984	2.18081	0.319	0.115	1
Scube2	0.0312379	-0.983743	0.149	0.385	1
Amfr	0.031292	1.09684	0.766	0.654	1
Zdhhc2	0.0314509	1.55706	0.426	0.192	1
Neurl4	0.0314998	1.84128	0.234	0.038	1
Cdc23	0.0315038	1.3637	0.468	0.269	1
Tuba4a	0.0315217	-1.54906	0.106	0.308	1
Pithd1	0.0315217	-1.37971	0.106	0.308	1
Smarcc2	0.0316796	1.3347	0.447	0.231	1
Sertad4	0.0317024	-1.93847	0.064	0.231	1
Atxn7l3b	0.0317617	-0.584661	0.766	0.962	1
Klhdc4	0.0317997	-1.91262	0.085	0.269	1
Nisch	0.0318569	0.609012	0.851	0.692	1
Inip	0.031912	1.64617	0.277	0.077	1
Nucb1	0.0319822	1.71221	0.404	0.192	1
Tlk1	0.0319822	-0.845713	0.234	0.5	1
Cul4b	0.0320312	-2.60533	0.021	0.154	1
Slc35e4	0.0320312	-2.49134	0.021	0.154	1
Yjefn3	0.0320312	-2.42648	0.021	0.154	1
Lonrf1	0.0320312	-2.38572	0.021	0.154	1
Wnt11	0.0320312	-2.37806	0.021	0.154	1
Rab10os	0.0320312	-2.36612	0.021	0.154	1
Ipmk	0.0320312	-2.2073	0.021	0.154	1
Setd6	0.0320312	-2.08858	0.021	0.154	1
Lactb2	0.0320312	-2.05861	0.021	0.154	1
Rgma	0.0320312	-1.98212	0.021	0.154	1
Lpar3	0.032184	-2.43881	0.043	0.192	1
Dicer1	0.0325407	1.16557	0.426	0.192	1
Gys1	0.0325479	1.40396	0.468	0.269	1
Hspa2	0.0325693	-1.37747	0.128	0.346	1
Vps13c	0.0325693	-1.3656	0.128	0.346	1
Ufsp1	0.0325693	-1.20831	0.128	0.346	1
Ndufb4	0.0326052	-0.298091	0.957	1	1
mt-Co1	0.0326066	0.282704	1	1	1
[truncated: 10,891 more rows]

## Sheet: E-His vs P-His
Gene	p_val	avg_log2FC	pct.1	pct.2	p_val_adj
Atp5o	5.04824e-70	11.3015	1	0.005	1.63835e-65
Sepw1	2.35004e-70	10.9332	1	0	7.62681e-66
Tceb2	2.35004e-70	10.8915	1	0	7.62681e-66
Shfm1	2.35004e-70	10.7554	1	0	7.62681e-66
Wbp5	2.35004e-70	10.7176	1	0	7.62681e-66
Ngfrap1	8.65643e-69	10.4744	0.984	0	2.80936e-64
Gnb2l1	1.43379e-69	10.3998	0.992	0	4.65323e-65
Gm10709	8.65643e-69	10.3142	0.984	0	2.80936e-64
RP23-455C13.7	3.05822e-67	10.1919	0.967	0	9.92513e-63
Hn1	5.80774e-62	9.97106	0.91	0	1.88485e-57
Myeov2	2.35004e-70	9.75187	1	0	7.62681e-66
2700060E02Rik	1.05452e-62	9.44846	0.918	0	3.42235e-58
Gm8730	1.74402e-55	9.42511	0.836	0	5.66003e-51
1110001J03Rik	5.94429e-65	9.36938	0.943	0	1.92916e-60
Rpl10	3.71011e-68	9.26766	1	0.033	1.20408e-63
Gbas	1.70998e-60	9.10967	0.893	0	5.54958e-56
Selk	1.05452e-62	9.07065	0.918	0	3.42235e-58
Zak	3.45552e-56	8.98102	0.844	0	1.12145e-51
Selm	1.74402e-55	8.92334	0.836	0	5.66003e-51
Tceb1	3.16701e-61	8.88229	0.902	0	1.02782e-56
Igf2	7.04808e-43	8.76847	0.68	0	2.28739e-38
Sep15	2.36943e-51	8.69834	0.787	0	7.68975e-47
Ptrf	8.71956e-55	8.66306	0.828	0	2.82985e-50
H19	3.79905e-40	8.50817	0.656	0.005	1.23294e-35
Atp5o.1	4.34656e-55	-10.9626	0	1	1.41063e-50
Elob	4.34656e-55	-10.468	0	1	1.41063e-50
2810428I15Rik	2.36943e-51	8.48395	0.787	0	7.68975e-47
Zfos1	2.44071e-49	8.42748	0.762	0	7.92107e-45
Selenow	1.16789e-54	-9.79919	0	0.995	3.79028e-50
Sem1	1.16792e-54	-9.7558	0	0.995	3.79036e-50
Selenom	1.51156e-52	-9.34503	0	0.972	4.90561e-48
2700094K13Rik	2.31964e-47	8.40191	0.738	0	7.52817e-43
Nhp2l1	4.31886e-54	8.30068	0.82	0	1.40164e-49
Rpl23a-ps3	2.44071e-49	8.26116	0.762	0	7.92107e-45
Deb1	1.12376e-48	8.24977	0.754	0	3.64706e-44
Rack1	3.12156e-54	-9.09737	0	0.991	1.01307e-49
Gltscr2	2.03708e-45	8.14907	0.713	0	6.61115e-41
Sdpr	1.24611e-41	8.13735	0.664	0	4.04412e-37
Gm9843	1.12376e-48	8.1107	0.754	0	3.64706e-44
Cxx1a	1.6552e-43	8.1019	0.689	0	5.37178e-39
Slmo2	7.04808e-43	8.03069	0.68	0	2.28739e-38
Retreg1	3.67035e-46	-9.00608	0	0.898	1.19117e-41
5430431A17Rik	6.73643e-51	-8.81766	0	0.953	2.18624e-46
2310036O22Rik	2.31971e-47	8.01023	0.738	0	7.52837e-43
Prkcdbp	8.76192e-37	7.96137	0.598	0	2.84359e-32
Gm45716	3.93579e-52	-8.79465	0	0.967	1.27732e-47
Fmc1	2.62739e-51	-8.75056	0	0.958	8.52694e-47
Bex3	3.93579e-52	-8.68904	0	0.967	1.27732e-47
Cops9	1.71827e-50	-8.46711	0	0.949	5.57647e-46
Selenok	6.73643e-51	-8.37055	0	0.953	2.18624e-46
Rtraf	1.18903e-44	-8.23501	0	0.879	3.85889e-40
Selt	8.70401e-40	7.86942	0.639	0	2.8248e-35
Eloc	6.26403e-47	-8.22168	0	0.907	2.03293e-42
Gm31659	1.35571e-38	-8.14619	0	0.8	4.39983e-34
Fam195b	8.899e-45	7.86207	0.705	0	2.88808e-40
Ict1	1.24611e-41	7.86116	0.664	0	4.04412e-37
Rex1bd	8.82016e-46	-7.98312	0	0.893	2.8625e-41
Rps26-ps1	1.6552e-43	7.83292	0.689	0	5.37178e-39
Gm10250	2.03708e-45	7.7818	0.713	0	6.61115e-41
Fam195a	2.13097e-40	7.7487	0.648	0	6.91585e-36
Apoa1bp	8.76192e-37	7.72091	0.598	0	2.84359e-32
Tmem261	2.13097e-40	7.7143	0.648	0	6.91585e-36
1810043H04Rik	8.70401e-40	7.69236	0.639	0	2.8248e-35
Gm561	1.41701e-38	7.50833	0.623	0	4.59876e-34
Srp54b	8.9445e-37	7.0825	0.607	0.005	2.90285e-32
Pam16	9.95569e-47	6.82716	0.754	0.019	3.23102e-42
Sept2	5.2698e-53	6.40793	0.836	0.023	1.71026e-48
Tonsl	4.91372e-44	6.27983	0.721	0.014	1.5947e-39
Rpl27	4.8532e-61	5.75285	0.967	0.088	1.57506e-56
Hba-a1	1.44885e-52	5.53852	0.852	0.042	4.70211e-48
Rpl13a	1.01901e-54	5.50109	1	0.46	3.30711e-50
Snu13	3.56888e-43	-7.85395	0	0.86	1.15825e-38
Selenof	1.90089e-42	-7.79497	0	0.851	6.16914e-38
Rps27	9.97351e-56	5.4944	1	0.391	3.2368e-51
Rps12	1.00743e-57	5.25055	1	0.288	3.26952e-53
Tbx20	3.88945e-41	5.10743	0.77	0.084	1.26228e-36
Ss18l2	5.73376e-40	-7.79294	0	0.819	1.86083e-35
Hbb-bs	2.96859e-52	4.22784	0.943	0.2	9.63426e-48
Btf3l4	1.02136e-48	4.16109	0.885	0.116	3.31471e-44
Myl7	3.91328e-29	4.06759	0.918	0.577	1.27001e-24
Tceal9	2.57131e-40	-7.63309	0	0.823	8.34494e-36
Gm10076	4.57057e-46	4.06308	0.885	0.177	1.48333e-41
Myl4	2.171e-44	3.9725	0.984	0.581	7.04577e-40
Nipsnap2	2.57131e-40	-7.6004	0	0.823	8.34494e-36
Mcrip2	6.18893e-39	-7.34769	0	0.805	2.00855e-34
Rpl36al	2.33481e-55	3.91229	1	0.391	7.57741e-51
Gapdh	2.0573e-52	3.81958	1	0.916	6.67675e-48
Ndufaf8	6.14314e-36	-7.32616	0	0.763	1.99369e-31
Cnn2	2.29627e-27	3.78446	0.631	0.102	7.45232e-23
Cnn1	2.71384e-31	3.72571	0.787	0.242	8.8075e-27
Rps18	7.81343e-54	3.71145	1	0.465	2.53577e-49
Bex4	3.68055e-35	3.46691	0.877	0.372	1.19448e-30
Marcksl1	2.17074e-32	3.45953	0.77	0.172	7.04493e-28
Nnt	2.41527e-27	3.44645	0.648	0.107	7.83853e-23
Gm8797	1.57442e-31	3.34969	0.754	0.149	5.10963e-27
Casq1	1.75788e-30	3.31664	0.828	0.312	5.70503e-26
Cebpd	2.46274e-21	-7.28684	0	0.521	7.99258e-17
Spag7	1.95828e-34	3.29387	0.795	0.186	6.35541e-30
Wdr89	2.66419e-30	3.2144	0.73	0.163	8.64638e-26
Rps2	2.51551e-52	3.09691	1	0.609	8.16382e-48
Ppp1r3c	5.34052e-28	2.99526	0.738	0.186	1.73321e-23
Coq8a	2.71564e-35	-7.27102	0	0.753	8.81334e-31
Rpl9	1.56457e-52	2.94402	1	0.874	5.07765e-48
Mmd	1.02749e-40	2.84404	0.926	0.349	3.33463e-36
Bves	4.60769e-34	2.8194	0.91	0.493	1.49538e-29
Trir	5.67378e-35	-7.26451	0	0.749	1.84137e-30
Mcrip1	1.38783e-37	-7.20516	0	0.786	4.50407e-33
Cenpx	1.03725e-33	-7.1733	0	0.73	3.36628e-29
Mkks	2.85445e-21	2.78321	0.615	0.153	9.26385e-17
Mrpl58	1.77621e-32	-7.14845	0	0.712	5.76453e-28
Vps28	1.77619e-32	-7.1067	0	0.712	5.76445e-28
Hpf1	1.03725e-33	-7.08092	0	0.73	3.36628e-29
Afdn	8.40098e-30	-6.96737	0	0.67	2.72645e-25
Tnnt1	1.05658e-09	2.77829	0.754	0.586	3.42902e-05
Sfrp1	2.85202e-14	2.77289	0.713	0.447	9.25596e-10
Tuba1b	1.21144e-41	2.76735	0.975	0.516	3.93161e-37
Lmntd1	4.12774e-25	-6.96172	0	0.591	1.33962e-20
Cox17	4.19892e-36	2.66373	0.902	0.442	1.36272e-31
Smim26	4.30396e-30	-6.87759	0	0.674	1.39681e-25
S100a11	5.82868e-26	2.64639	0.852	0.395	1.89164e-21
Mif	1.34668e-42	2.63062	0.992	0.86	4.3705e-38
Naxe	6.10647e-29	-6.76817	0	0.656	1.98179e-24
Rps27rt	2.89281e-23	2.60868	0.68	0.186	9.38831e-19
Grb10	8.82605e-48	2.60207	1	0.726	2.86441e-43
Dmac1	2.24869e-28	-6.76317	0	0.647	7.2979e-24
Map3k20	2.49524e-24	-6.59193	0	0.577	8.09807e-20
Prelid3b	6.61791e-26	-6.57807	0	0.605	2.14778e-21
Rpl21	1.71708e-49	2.56091	0.992	0.847	5.57261e-45
Vim	5.16116e-31	2.47261	0.918	0.46	1.675e-26
Selenoh	2.25022e-25	-6.57632	0	0.595	7.30288e-21
Csrp1	2.60278e-20	2.42116	0.803	0.451	8.44706e-16
4631405J19Rik	8.13993e-24	-6.52334	0	0.567	2.64173e-19
Mical2	1.24878e-20	2.41359	0.697	0.256	4.0528e-16
Clu	9.18473e-20	2.40793	0.91	0.693	2.98081e-15
Naxd	5.48534e-27	-6.52304	0	0.623	1.78021e-22
Cavin1	1.47518e-22	-6.45573	0	0.544	4.78756e-18
Nectin2	4.67613e-23	-6.44908	0	0.553	1.51759e-18
Csrp2	4.39982e-22	2.38526	0.934	0.735	1.42792e-17
Pdk1	2.94606e-21	2.34237	0.721	0.26	9.56113e-17
2900097C17Rik	1.47518e-22	-6.41608	0	0.544	4.78756e-18
Tubb2b	7.39145e-20	2.31911	0.721	0.27	2.39882e-15
Nbdy	8.13993e-24	-6.37013	0	0.567	2.64173e-19
Selenos	2.46277e-21	-6.3506	0	0.521	7.99266e-17
Snrpg	9.73437e-28	2.27951	0.844	0.391	3.15919e-23
Marcks	2.2986e-21	2.25468	0.779	0.33	7.45988e-17
Thap12	8.06491e-22	-6.33605	0	0.53	2.61739e-17
Ftl1	5.56913e-50	2.22762	1	0.986	1.80741e-45
Selenot	8.31927e-23	-6.32073	0	0.549	2.69994e-18
Mettl26	8.065e-22	-6.3111	0	0.53	2.61741e-17
Etfrf1	2.46277e-21	-6.30346	0	0.521	7.99266e-17
Hikeshi	8.06491e-22	-6.262	0	0.53	2.61739e-17
Sept6	1.47807e-17	2.2265	0.656	0.237	4.79694e-13
Utp11	1.28317e-20	-6.24232	0	0.507	4.1644e-16
Gpx3	1.6101e-28	2.21248	0.951	0.726	5.22542e-24
Prpf19	1.97407e-17	2.20084	0.656	0.247	6.40665e-13
Fhl1	1.8324e-16	2.19411	0.746	0.381	5.94686e-12
Zyx	9.68192e-16	2.16814	0.672	0.307	3.14217e-11
Mfge8	1.28436e-15	2.16624	0.689	0.33	4.16825e-11
Rpl35	2.3792e-46	2.13198	1	0.916	7.72147e-42
Tax1bp3	1.76516e-22	2.11852	0.811	0.451	5.72865e-18
Fosb	3.32103e-38	-6.2385	0.025	0.809	1.07781e-33
Gnb5	4.44223e-26	-6.14031	0.008	0.614	1.44168e-21
Dcpp1	3.09715e-22	-5.73417	0.016	0.567	1.00515e-17
Gm42418	8.40931e-51	-5.62507	0.525	1	2.72916e-46
Erh	4.02722e-39	2.11601	0.959	0.647	1.30699e-34
Klf2	2.00835e-24	-5.09114	0.074	0.642	6.51791e-20
Tagln	7.76871e-14	2.09783	0.664	0.298	2.52126e-09
Cdh6	5.16374e-20	-5.0548	0.016	0.516	1.67584e-15
Stra13	1.91776e-34	7.46643	0.566	0	6.2239e-30
Rpl7a	7.03679e-48	2.08601	1	0.879	2.28372e-43
Tmsb4x	3.70264e-43	2.0724	1	0.986	1.20166e-38
Myl12a	1.91006e-38	2.05855	0.992	0.847	6.19892e-34
Cxx1b	7.23426e-34	7.4093	0.557	0	2.34781e-29
Gadd45b	8.32246e-51	-4.73248	0.344	1	2.70097e-46
Pdlim3	7.0149e-23	2.05437	0.877	0.581	2.27662e-18
Pcp4	1.61176e-23	-4.61002	0.098	0.656	5.23079e-19
Gja5	7.0544e-20	-4.26411	0.033	0.54	2.28943e-15
Fam134b	2.70804e-33	7.84484	0.549	0	8.78869e-29
Sepp1	2.70804e-33	7.84055	0.549	0	8.78869e-29
Mesdc2	2.70804e-33	7.23738	0.549	0	8.78869e-29
Irf1	4.95185e-20	-4.17161	0.041	0.553	1.60707e-15
Bex1	4.72799e-21	2.03476	0.836	0.516	1.53442e-16
Cnn3	6.15648e-19	2.02659	0.746	0.33	1.99803e-14
Lyrm5	1.00601e-32	7.41133	0.541	0	3.2649e-28
2210013O21Rik	1.00601e-32	7.21041	0.541	0	3.2649e-28
Nfkbia	3.05244e-42	-4.10014	0.279	0.93	9.90639e-38
Klf4	1.83076e-24	-4.09065	0.057	0.651	5.94156e-20
Socs3	1.2733e-26	-4.05556	0.057	0.698	4.13235e-22
Amotl1	6.26907e-15	2.02116	0.631	0.251	2.03456e-10
Sorbs2	5.38196e-37	2.01887	0.992	0.884	1.74666e-32
Atf3	1.0895e-39	-4.05022	0.221	0.921	3.53586e-35
Nrp1	1.86351e-18	2.01265	0.77	0.391	6.04785e-14
Rpl6l	1.35715e-31	7.2005	0.525	0	4.40448e-27
Utp11l	1.35715e-31	7.07137	0.525	0	4.40448e-27
Tuba1a	3.89313e-31	2.01188	0.967	0.819	1.26348e-26
Jun	2.36897e-45	-3.66169	0.549	0.981	7.68826e-41
Pfn1	6.36463e-50	2.0058	1	0.921	2.06558e-45
Eif3j1	2.88313e-14	2.00547	0.607	0.233	9.3569e-10
Ppp2r4	4.92888e-31	7.32477	0.516	0	1.59962e-26
Wdr1	2.75883e-16	2.0044	0.697	0.363	8.9535e-12
Stard10	2.14559e-42	-3.62615	0.246	0.935	6.96331e-38
Ppp1r15a	7.08885e-26	-3.54303	0.107	0.716	2.30062e-21
Myh7	1.15434e-42	2.00426	0.984	0.958	3.74629e-38
Rpl10-ps3	3.2937e-12	1.97871	0.59	0.265	1.06894e-07
Ivns1abp	3.99551e-13	1.9635	0.672	0.377	1.2967e-08
Rps29	1.78402e-52	1.96101	1	0.995	5.78985e-48
Gyg	3.96039e-34	1.92864	0.984	0.921	1.28531e-29
Hmgb1	2.20555e-30	1.92423	0.943	0.716	7.1579e-26
Fos	3.6837e-40	-3.54091	0.361	0.958	1.19551e-35
Mid1ip1	2.317e-20	-3.43902	0.123	0.633	7.51959e-16
Gem	1.82959e-28	-3.35438	0.139	0.781	5.93775e-24
Klf9	3.23066e-27	-3.35365	0.123	0.744	1.04848e-22
Ank1	7.2063e-41	-3.30879	0.197	0.935	2.33873e-36
Mdk	8.49251e-30	4.716	0.582	0.037	2.75616e-25
Gadd45g	1.22707e-40	-3.2126	0.598	0.977	3.98234e-36
Junb	9.76117e-31	-3.20177	0.287	0.851	3.16789e-26
Ccdc53	2.25839e-29	7.00378	0.492	0	7.32938e-25
Ifrd1	4.43895e-33	-3.05174	0.311	0.893	1.44062e-28
Hcn4	1.44423e-15	-2.9704	0.123	0.549	4.68711e-11
Snhg12	5.22257e-17	-2.92148	0.098	0.567	1.69493e-12
Prnp	1.66451e-22	1.91774	0.885	0.642	5.40199e-18
Tesc	4.64172e-42	-2.86337	0.5	0.972	1.50642e-37
Scn5a	6.58333e-17	-2.8568	0.074	0.549	2.13655e-12
Nr1d1	2.12901e-14	-2.85573	0.09	0.502	6.90948e-10
Sdc4	1.6713e-30	-2.83418	0.27	0.86	5.42403e-26
Gpr146	2.69731e-13	-2.82571	0.107	0.502	8.75383e-09
Sap18	2.39944e-18	1.9122	0.689	0.237	7.78715e-14
Rpl4	2.89042e-47	1.90391	1	0.935	9.38057e-43
Ezr	4.14472e-39	-2.82523	0.336	0.949	1.34513e-34
Slc8a1	5.20363e-24	-2.8192	0.197	0.744	1.68879e-19
Vimp	2.78792e-28	7.26781	0.475	0	9.0479e-24
Olfm1	2.17995e-15	-2.78404	0.066	0.512	7.07481e-11
Eno1	1.87859e-30	1.89807	0.967	0.66	6.09679e-26
Rcn3	6.15065e-12	1.88555	0.59	0.251	1.99613e-07
Lars2	2.08906e-12	-2.78164	0.131	0.507	6.77984e-08
Rfwd2	9.68984e-28	7.00869	0.467	0	3.14474e-23
Vcl	1.63501e-13	1.88201	0.607	0.242	5.30627e-09
Loxl2	1.20897e-27	4.36769	0.574	0.056	3.9236e-23
Socs2	6.19367e-24	-2.78101	0.189	0.758	2.01009e-19
Cycs	3.93816e-40	1.84161	0.992	0.953	1.27809e-35
Anxa2	5.10685e-27	1.82057	0.926	0.656	1.65738e-22
Pgk1	7.15602e-45	-2.7674	0.426	0.986	2.32242e-40
Gm2000	3.0286e-27	4.04387	0.566	0.051	9.82901e-23
Lsm12	4.29935e-27	-2.76199	0.197	0.791	1.39531e-22
Gm5900	3.34384e-27	6.97044	0.459	0	1.08521e-22
Ier3	1.67161e-21	-2.73596	0.393	0.814	5.42506e-17
Limch1	5.26422e-18	-2.72754	0.123	0.614	1.70845e-13
Cdk4	4.02066e-22	1.81471	0.869	0.53	1.30486e-17
Hmgn2	9.37026e-20	1.80207	0.844	0.553	3.04102e-15
Abra	6.86488e-14	-2.72155	0.107	0.516	2.22793e-09
Pim1	7.78135e-22	-2.67683	0.221	0.74	2.52536e-17
Ankrd1	5.55235e-08	1.79636	0.844	0.842	0.00180196
Id1	1.78388e-16	-2.66936	0.164	0.614	5.78939e-12
Irs2	4.37846e-14	-2.63961	0.131	0.53	1.42098e-09
Ier2	1.47733e-21	-2.61561	0.246	0.744	4.79454e-17
Rplp1	1.39379e-50	1.77576	1	0.991	4.52341e-46
Malt1	9.80261e-16	-2.61016	0.123	0.567	3.18134e-11
Cox7c	1.53135e-26	-0.548894	1	1	4.96985e-22
1110002E22Rik	8.38728e-12	1.73477	0.615	0.298	2.72201e-07
Myl6	5.87346e-33	1.72619	1	0.949	1.90617e-28
Mllt4	3.89818e-26	6.88168	0.443	0	1.26512e-21
Brd1	9.85932e-22	-2.60356	0.189	0.716	3.19974e-17
Tgfb2	1.20409e-13	1.72575	0.77	0.456	3.90777e-09
8430408G22Rik	3.70174e-14	-2.6005	0.156	0.563	1.20136e-09
Fam174b	2.27826e-17	-2.58616	0.139	0.614	7.39387e-13
Rab20	2.96984e-17	-2.56601	0.164	0.623	9.63832e-13
Bre	1.31702e-25	6.75108	0.434	0	4.27425e-21
Tgm2	1.9767e-14	1.70848	0.754	0.498	6.41517e-10
mt-Nd4l	2.52279e-50	-2.52633	0.967	1	8.18748e-46
Ilk	7.18164e-17	1.70523	0.803	0.54	2.33073e-12
Zfp30	4.5723e-19	-2.52376	0.18	0.67	1.48389e-14
Etv1	8.03859e-34	-2.50743	0.27	0.944	2.60884e-29
Mef2c	6.48261e-25	4.67193	0.508	0.042	2.10387e-20
Sorcs2	8.38829e-15	-2.50678	0.123	0.563	2.72233e-10
Hspb7	4.65255e-36	1.69528	0.984	0.981	1.50994e-31
Pim3	7.23919e-21	-2.49266	0.27	0.763	2.34941e-16
Cox7a2	1.55659e-24	-0.538539	0.992	1	5.05175e-20
Nppa	1.21045e-08	-2.49082	0.205	0.549	0.000392839
Hopx	2.94376e-39	-2.47928	0.803	0.995	9.55368e-35
Lmod2	1.62568e-39	-2.46101	0.672	0.991	5.27597e-35
Dpcd	4.87212e-24	6.86725	0.41	0	1.5812e-19
Smad7	1.88841e-20	-2.38179	0.205	0.735	6.12863e-16
Ddit3	3.06704e-18	-2.36357	0.246	0.693	9.95378e-14
Osbpl8	3.72015e-10	1.67541	0.623	0.326	1.20734e-05
Irx5	2.94315e-29	-2.33393	0.295	0.898	9.55171e-25
mt-Nd6	3.32084e-18	-2.33284	0.254	0.73	1.07774e-13
Rps24	1.16155e-23	-0.565366	1	1	3.76971e-19
Egr1	1.10379e-17	-2.32159	0.197	0.688	3.58224e-13
Aldh2	3.23833e-10	-2.32102	0.197	0.53	1.05097e-05
Srgap1	5.00821e-13	-2.31473	0.115	0.516	1.62537e-08
Ppp1r3a	4.55184e-14	-2.3013	0.123	0.558	1.47725e-09
Srsf1	7.00856e-14	1.66263	0.672	0.293	2.27456e-09
Cald1	1.21937e-10	1.65807	0.746	0.516	3.95735e-06
Mlip	2.36497e-17	1.62107	0.861	0.581	7.67528e-13
Art3	2.71213e-19	-2.29594	0.205	0.716	8.80195e-15
Fdx1l	3.88127e-23	5.64812	0.41	0.005	1.25963e-18
Atp5h	4.35902e-23	-0.489451	1	1	1.41468e-18
Dbh	2.04914e-16	-2.22139	0.172	0.665	6.65029e-12
Fabp3-ps1	5.2275e-23	6.63379	0.393	0	1.69653e-18
Cish	7.95035e-17	-2.21307	0.197	0.66	2.58021e-12
Hes1	1.61469e-18	-2.18328	0.221	0.744	5.24031e-14
Ube2d1	2.05341e-12	1.61673	0.615	0.237	6.66415e-08
Dnajb1	1.62271e-09	-2.17554	0.238	0.549	5.26635e-05
Ogt	1.12953e-13	1.60345	0.738	0.409	3.66579e-09
Ier5	6.34056e-22	-2.15531	0.303	0.828	2.05776e-17
Cdk6	1.21713e-22	3.19116	0.582	0.107	3.95008e-18
Herpud1	1.09172e-22	-2.15432	0.32	0.842	3.54307e-18
Myh6	5.04389e-42	-2.13385	0.861	1	1.63694e-37
Kcng2	1.67881e-38	-2.13081	0.615	0.986	5.4484e-34
Phlda1	7.26509e-21	-2.13048	0.287	0.781	2.35781e-16
Adam10	1.52577e-09	1.58968	0.59	0.33	4.95173e-05
Rps6	5.61774e-44	1.5861	0.992	0.986	1.82318e-39
0610011F06Rik	1.69509e-22	6.84309	0.385	0	5.50125e-18
Carkd	1.69509e-22	6.74916	0.385	0	5.50125e-18
l7Rn6	1.69509e-22	6.54331	0.385	0	5.50125e-18
Rab11a	6.79811e-17	1.58534	0.795	0.498	2.20626e-12
Tgfb1i1	3.86369e-14	1.5795	0.754	0.447	1.25392e-09
Mgll	2.17133e-18	-2.11668	0.262	0.735	7.04683e-14
Cmya5	2.18262e-17	-2.10133	0.23	0.698	7.08346e-13
Dsg2	1.13168e-13	-2.07267	0.197	0.605	3.67276e-09
Rpl38	4.28679e-48	1.55981	1	0.995	1.39123e-43
Tia1	5.2683e-12	1.55883	0.672	0.358	1.70977e-07
Rps18-ps3	5.46002e-22	6.77014	0.377	0	1.772e-17
Smek2	5.46002e-22	6.58094	0.377	0	1.772e-17
1700040L02Rik	5.46002e-22	6.57233	0.377	0	1.772e-17
Gm6483	5.46002e-22	6.44567	0.377	0	1.772e-17
Toporsos	5.46002e-22	6.42624	0.377	0	1.772e-17
Sparcl1	3.84194e-17	-2.06573	0.311	0.758	1.24686e-12
Txnip	5.40173e-29	-2.0641	0.582	0.944	1.75308e-24
Capza1	1.45706e-14	1.55119	0.721	0.363	4.72876e-10
Pcp4l1	7.29252e-26	-2.06363	0.402	0.888	2.36671e-21
Mcl1	2.23059e-22	-2.06285	0.393	0.823	7.23915e-18
Csnk2a2	2.02529e-13	-2.05915	0.148	0.553	6.57288e-09
Zfp622	1.57896e-11	-2.05268	0.123	0.512	5.12435e-07
Rab21	7.55414e-16	-2.05039	0.197	0.66	2.45162e-11
Hlf	9.80797e-14	-2.02361	0.189	0.619	3.18308e-09
Idi1	4.10934e-12	-2.0073	0.205	0.595	1.33364e-07
Col4a4	1.73393e-10	-2.00349	0.164	0.516	5.62729e-06
Slco3a1	2.92648e-22	-2.003	0.303	0.842	9.49758e-18
Erbb2ip	1.74711e-21	6.71904	0.369	0	5.67007e-17
Ndnl2	1.74711e-21	6.50895	0.369	0	5.67007e-17
Adamts1	5.87396e-14	-2.00027	0.254	0.66	1.90634e-09
Irx2	2.11292e-15	-1.99079	0.131	0.581	6.85726e-11
Cox6a1	6.00185e-40	1.54863	1	0.986	1.94784e-35
Btg2	1.28279e-21	-1.98823	0.41	0.847	4.16316e-17
Gm11808	8.35868e-15	1.5409	0.746	0.414	2.71273e-10
Wfdc1	1.28949e-13	-1.98512	0.172	0.605	4.18491e-09
Sertad1	3.41433e-12	-1.98268	0.213	0.581	1.10809e-07
Xirp2	2.57371e-20	-1.96959	0.098	0.656	8.35271e-16
Atp5k	2.35715e-43	1.53159	1	0.981	7.6499e-39
Tceal8	7.86546e-24	1.53133	0.926	0.66	2.55266e-19
Rpl17	4.7471e-48	1.52314	1	0.981	1.54062e-43
Cox6c	4.73517e-21	-0.478379	1	1	1.53675e-16
0610009L18Rik	5.55382e-21	6.55346	0.361	0	1.80244e-16
0610007P14Rik	5.55382e-21	6.52915	0.361	0	1.80244e-16
Rpl36-ps3	5.55382e-21	6.5186	0.361	0	1.80244e-16
Whsc1l1	5.55382e-21	6.50973	0.361	0	1.80244e-16
N6amt2	5.55382e-21	6.37794	0.361	0	1.80244e-16
Cyp51	1.93262e-11	-1.95918	0.197	0.558	6.27214e-07
Ccdc186	1.24331e-09	-1.94972	0.18	0.502	4.03503e-05
Ech1	6.76011e-40	-1.93381	0.811	0.991	2.19392e-35
Ramp1	9.95355e-42	-1.91826	0.852	1	3.23032e-37
Hnrnpa3	3.74032e-26	1.51853	0.967	0.73	1.21388e-21
Fgl2	9.86103e-18	-1.9041	0.41	0.814	3.2003e-13
Khdrbs3	2.65859e-17	-1.9012	0.279	0.721	8.62818e-13
Cebpb	5.74804e-11	-1.90053	0.189	0.544	1.86547e-06
Nudt8	1.75401e-20	6.50289	0.352	0	5.69246e-16
Gm10116	1.75401e-20	6.43272	0.352	0	5.69246e-16
BC026585	1.75401e-20	6.29807	0.352	0	5.69246e-16
Nrtn	7.00503e-28	-1.89767	0.631	0.958	2.27341e-23
Fam81a	1.29883e-17	-1.89646	0.336	0.8	4.21523e-13
Msmo1	7.35338e-11	-1.88568	0.238	0.591	2.38647e-06
Tnni1	1.81864e-46	1.51044	0.992	1	5.90223e-42
Itga9	2.76965e-20	3.41228	0.566	0.135	8.98863e-16
Hspa5	6.1829e-36	-1.88248	0.926	0.995	2.0066e-31
Gm17018	3.79638e-20	-6.13384	0	0.498	1.23208e-15
Hrc	3.30841e-23	-1.8775	0.451	0.907	1.07371e-18
Gpc3	4.9385e-20	3.05752	0.574	0.135	1.60274e-15
Vcan	3.71889e-30	-1.87719	0.475	0.972	1.20693e-25
Pmepa1	3.75594e-29	-1.87457	0.557	0.949	1.21895e-24
Pvrl2	5.50378e-20	6.65712	0.344	0	1.7862e-15
Smek1	5.50378e-20	6.34576	0.344	0	1.7862e-15
Usp15	1.45408e-12	-1.85096	0.197	0.595	4.71908e-08
Fhl2	6.8858e-20	1.50984	0.918	0.623	2.23472e-15
Lnpep	1.71342e-10	-1.84066	0.164	0.53	5.56073e-06
Uba52	9.78242e-13	1.49889	0.746	0.465	3.17479e-08
Pabpc1	7.26264e-20	1.49262	0.91	0.684	2.35702e-15
Gata6	1.19187e-13	1.45278	0.803	0.428	3.86811e-09
Fgf1	3.06544e-14	-1.83118	0.18	0.637	9.94856e-10
Prelid1	2.17303e-16	1.44538	0.852	0.535	7.05236e-12
Slc6a6	2.57567e-14	-1.81657	0.156	0.6	8.35908e-10
Bnip3	3.71913e-09	1.44208	0.697	0.521	0.000120701
Jpt1	1.10939e-19	-6.26537	0	0.488	3.60041e-15
Acaa2	2.14066e-29	-1.81168	0.721	0.944	6.94728e-25
Fam63b	1.71595e-19	6.43296	0.336	0	5.56893e-15
Setd8	1.71595e-19	6.15566	0.336	0	5.56893e-15
Dusp1	4.82161e-12	-1.79674	0.377	0.712	1.56481e-07
Lpgat1	3.43316e-19	-1.79034	0.484	0.828	1.1142e-14
Cntn2	2.99364e-19	-5.94809	0.008	0.488	9.71557e-15
Rtl8a	3.20242e-19	-6.16158	0	0.479	1.03931e-14
Hdgfl3	3.20242e-19	-6.1008	0	0.479	1.03931e-14
Nop53	3.20242e-19	-5.959	0	0.479	1.03931e-14
Irx3	8.63181e-15	-1.78747	0.295	0.74	2.80137e-10
Fdps	6.06503e-13	-1.77813	0.32	0.698	1.96834e-08
Lyz2	3.15167e-17	-1.7471	0.254	0.744	1.02284e-12
Rpl15	9.9594e-50	-1.74697	0.984	1	3.23223e-45
Srsf6	7.89574e-15	1.43707	0.836	0.535	2.56248e-10
Murc	5.31595e-19	6.5261	0.328	0	1.72524e-14
Ufd1l	5.31595e-19	6.42642	0.328	0	1.72524e-14
Mesd	5.41629e-19	-6.09184	0	0.474	1.7578e-14
Tubb5	1.03718e-28	1.42705	0.984	0.935	3.36608e-24
Rps28	5.97873e-39	1.42285	1	0.981	1.94034e-34
Arl4a	1.3194e-13	-1.73217	0.32	0.712	4.28197e-09
Rpl36a	5.62473e-43	1.41942	1	0.977	1.82545e-38
Mir670hg	9.13314e-19	-5.92395	0	0.47	2.96407e-14
Lamb2	2.02082e-16	-1.71613	0.385	0.781	6.55836e-12
Id3	7.17391e-18	-1.71366	0.516	0.87	2.32822e-13
Slc16a12	1.48346e-18	-4.83119	0.025	0.498	4.81442e-14
Rtf2	1.53545e-18	-5.87509	0	0.465	4.98316e-14
E330017L17Rik	1.53547e-18	-6.32835	0	0.465	4.98321e-14
Rps11	1.57294e-18	0.562826	1	1	5.10481e-14
Scrn1	1.26654e-10	-1.71044	0.221	0.586	4.11044e-06
BC029214	1.6365e-18	6.41975	0.32	0	5.31111e-14
2700029M09Rik	1.6365e-18	6.41834	0.32	0	5.31111e-14
Rtfdc1	1.6365e-18	6.26575	0.32	0	5.31111e-14
B630005N14Rik	1.6365e-18	6.20569	0.32	0	5.31111e-14
Gm10020	1.6365e-18	6.08961	0.32	0	5.31111e-14
Prkrir	1.6365e-18	5.95524	0.32	0	5.31111e-14
Fstl3	1.65146e-18	3.33917	0.525	0.112	5.35965e-14
Plk2	1.08754e-11	-1.69045	0.287	0.656	3.52951e-07
Fkbp1a	1.02669e-33	1.40458	0.984	0.907	3.33203e-29
Sec11c	2.79633e-15	-1.67891	0.254	0.721	9.07522e-11
Gm14698	2.09014e-18	5.14663	0.344	0.009	6.78333e-14
Pth1r	4.59021e-10	-1.67479	0.156	0.516	1.48971e-05
Usmg5	2.26933e-18	0.538221	1	0.995	7.36489e-14
Npc2	3.07211e-15	1.39571	0.852	0.553	9.97022e-11
Ntm	4.6127e-19	-1.66253	0.426	0.879	1.49701e-14
Acta1	2.35536e-18	5.29344	0.369	0.019	7.6441e-14
Fzd2	1.36359e-10	1.37383	0.631	0.307	4.42539e-06
Nsmce3	2.57379e-18	-5.9697	0	0.46	8.35296e-14
Pcdh7	7.45933e-15	-1.64905	0.393	0.74	2.42085e-10
Hist1h2bc	7.62079e-09	-1.64794	0.279	0.586	0.000247325
Jund	3.42962e-29	-1.64721	0.844	0.981	1.11305e-24
Bod1	2.5312e-14	-1.64171	0.295	0.702	8.21477e-10
Rpl35a	3.69614e-18	0.534293	1	0.995	1.19954e-13
Tnni3	3.85067e-18	-0.529112	0.992	1	1.2497e-13
Mlf1	4.84141e-36	-1.63725	0.877	0.986	1.57123e-31
Mosmo	4.30152e-18	-5.82599	0	0.456	1.39602e-13
Suv420h1	5.00651e-18	6.29503	0.311	0	1.62481e-13
Cpne5	1.01305e-24	-1.63527	0.451	0.94	3.28776e-20
Ndufa11	6.41221e-18	-0.567955	0.992	1	2.08102e-13
Ptpa	7.16799e-18	-5.80006	0	0.451	2.3263e-13
Isoc1	2.90703e-11	-1.62911	0.238	0.605	9.43449e-07
Ndufab1	7.62041e-18	-0.57058	0.984	1	2.47313e-13
2610001J05Rik	5.45958e-11	1.37107	0.713	0.442	1.77185e-06
Cd24a	9.18853e-18	3.8242	0.402	0.037	2.98204e-13
Cidea	1.53304e-20	-1.62201	0.377	0.86	4.97533e-16
Pdlim1	9.882e-18	2.83905	0.557	0.153	3.20711e-13
Rab12	7.03948e-19	-1.61999	0.443	0.851	2.28459e-14
Hmgcs1	2.18334e-12	-1.61743	0.369	0.716	7.0858e-08
Asrgl1	7.2233e-09	-1.61737	0.254	0.572	0.000234425
Ctnnd1	1.31044e-17	2.40601	0.574	0.149	4.25292e-13
mt-Nd1	1.32856e-17	0.574154	1	1	4.31171e-13
Ppp1cb	1.05458e-22	1.37022	0.951	0.805	3.42254e-18
Tmem123	1.73095e-17	3.1612	0.467	0.084	5.61763e-13
Hnrnpa1	1.93715e-25	1.3671	0.967	0.842	6.28683e-21
Tpm1	7.68722e-51	-1.60204	0.984	1	2.49481e-46
Ddx50	3.34472e-15	-1.59605	0.451	0.777	1.08549e-10
Dync1i2	9.07296e-10	1.36675	0.656	0.456	2.94454e-05
Tshz1	7.18631e-11	-1.56961	0.221	0.605	2.33224e-06
Arid5b	4.97181e-10	-1.56753	0.295	0.623	1.61355e-05
Pitpnc1	5.28134e-11	-1.56645	0.27	0.623	1.71401e-06
Rpl7	2.99025e-17	0.562771	1	1	9.70456e-13
Slc38a4	3.06441e-17	2.93897	0.557	0.172	9.94523e-13
Myl1	1.48084e-09	-1.54423	0.369	0.665	4.80591e-05
Gm20594	3.25955e-17	-6.01477	0	0.437	1.05785e-12
Agpat3	4.08055e-13	-1.54024	0.328	0.726	1.3243e-08
Hadh	2.61184e-27	-1.53404	0.672	0.958	8.47648e-23
Asun	4.59951e-17	6.0331	0.295	0	1.49272e-12
Rpl13-ps3	4.59951e-17	5.97953	0.295	0	1.49272e-12
Postn	4.74688e-17	5.79583	0.32	0.009	1.54055e-12
Cox6a2	1.08592e-42	-1.53382	0.959	1	3.52423e-38
Mdh1	6.54131e-17	-0.583872	1	1	2.12292e-12
Sertad2	5.41112e-11	-1.53301	0.328	0.674	1.75613e-06
Fam162a	4.83675e-19	1.35546	0.951	0.819	1.56972e-14
Cd164	1.65875e-12	1.35327	0.779	0.493	5.38329e-08
R3hdm2	6.68103e-14	-1.52762	0.451	0.758	2.16826e-09
Usp34	3.23562e-13	-1.51655	0.369	0.73	1.05009e-08
Tmsb10	4.67261e-32	1.34898	1	0.963	1.51645e-27
Rps12-ps3	8.51556e-17	3.05426	0.533	0.153	2.76364e-12
Rpl6	8.70059e-17	0.555974	1	1	2.82369e-12
Maip1	8.81935e-17	-5.77733	0	0.428	2.86223e-12
mt-Nd4	9.04899e-17	-0.550443	1	1	2.93676e-12
Dyrk2	1.11628e-16	-3.86462	0.025	0.474	3.62277e-12
Fn1	1.14366e-16	5.51262	0.303	0.005	3.71163e-12
Ankrd11	1.71525e-16	-1.51308	0.443	0.814	5.56668e-12
Uba1	4.93519e-12	1.34575	0.73	0.433	1.60167e-07
Fam134a	1.3814e-16	6.23993	0.287	0	4.48319e-12
Prune	1.3814e-16	6.11382	0.287	0	4.48319e-12
9430016H08Rik	1.3814e-16	6.10285	0.287	0	4.48319e-12
Gm16586	1.3814e-16	5.95531	0.287	0	4.48319e-12
Abhd8	4.08547e-10	-1.49952	0.23	0.591	1.3259e-05
Cdk14	1.86924e-10	-1.48676	0.328	0.651	6.06644e-06
Fbxo32	4.10447e-17	-1.47428	0.484	0.884	1.33206e-12
Dynll1	6.31486e-33	1.34288	1	0.986	2.04943e-28
Mmp23	1.84167e-16	3.56356	0.377	0.037	5.97696e-12
Hbb-bt	1.90736e-16	4.30595	0.344	0.023	6.19013e-12
Slc2a1	1.92906e-16	2.64404	0.557	0.153	6.26058e-12
Rock1	2.79283e-19	-1.4718	0.598	0.912	9.06384e-15
Dek	3.71989e-14	-1.46423	0.418	0.786	1.20725e-09
Nono	1.0842e-14	1.3368	0.844	0.549	3.51865e-10
Ier3ip1	2.55069e-13	1.33352	0.762	0.456	8.27802e-09
Nudt4	2.16019e-11	-1.46374	0.369	0.698	7.01068e-07
Morf4l2	7.92568e-15	1.3332	0.836	0.567	2.5722e-10
Gucy1b3	4.12389e-16	6.23381	0.279	0	1.33837e-11
Hdgfrp3	4.12389e-16	6.19554	0.279	0	1.33837e-11
Whsc1	4.12389e-16	6.1851	0.279	0	1.33837e-11
Gm21092	4.12389e-16	6.05491	0.279	0	1.33837e-11
Dcpp2	5.2871e-16	-7.91089	0.008	0.423	1.71587e-11
Smad4	2.8258e-08	-1.46062	0.221	0.53	0.000917085
Wdr74	6.1343e-16	4.70779	0.303	0.009	1.99083e-11
Tpt1	6.21006e-16	-0.442161	1	1	2.01541e-11
Gm34030	6.24187e-16	-5.89516	0	0.409	2.02574e-11
Mindy2	6.24197e-16	-5.76064	0	0.409	2.02577e-11
Zfp91	5.5786e-14	-1.45913	0.434	0.8	1.81048e-09
Ndufa5	8.58441e-16	-0.557671	0.975	1	2.78598e-11
Strip2	1.69934e-08	1.32774	0.664	0.419	0.000551505
Mpped2	8.25935e-21	-1.45642	0.541	0.935	2.68049e-16
Rplp2	4.26191e-46	1.31859	1	0.995	1.38316e-41
Cabcoco1	1.01105e-15	-5.84472	0	0.405	3.28127e-11
Rab1a	2.86422e-13	1.31524	0.795	0.572	9.29555e-09
Timm8a1	1.12356e-15	-4.12016	0.025	0.447	3.64641e-11
Rnaset2a	1.14149e-15	3.70313	0.385	0.051	3.70459e-11
Atp5sl	1.22377e-15	5.94709	0.27	0	3.97163e-11
Aspscr1	6.2285e-14	1.30528	0.869	0.651	2.0214e-09
Pnrc1	9.02215e-20	-1.44661	0.639	0.94	2.92805e-15
Mbd2	4.37339e-09	-1.44233	0.262	0.591	0.000141934
Atcayos	1.65845e-20	-1.44133	0.68	0.935	5.38234e-16
Erbin	1.63324e-15	-5.83769	0	0.4	5.30053e-11
Washc3	1.63324e-15	-5.66808	0	0.4	5.30053e-11
Lpar3	1.99178e-15	2.56819	0.516	0.14	6.46413e-11
mt-Nd5	1.75727e-37	-1.4383	1	1	5.70305e-33
Ammecr1	2.1431e-15	2.97153	0.467	0.107	6.95523e-11
Obscn	2.59728e-14	-1.42571	0.533	0.8	8.4292e-10
Tpm4	2.3297e-15	3.33747	0.402	0.06	7.5608e-11
Xist	1.61423e-14	-1.42535	0.074	0.549	5.23883e-10
Gm47283	2.63108e-15	-5.9073	0	0.395	8.53892e-11
Ppp4r3a	2.63108e-15	-5.6186	0	0.395	8.53892e-11
Bhlhe40	9.79011e-08	-1.42094	0.23	0.526	0.00317728
Ap2m1	7.47487e-15	1.30464	0.803	0.628	2.42589e-10
Ssr1	4.99328e-09	1.30117	0.623	0.33	0.000162052
Cited2	1.46578e-16	-1.41305	0.574	0.898	4.75704e-12
Scube2	1.55729e-10	-1.3998	0.369	0.702	5.05404e-06
Rel	3.56645e-15	-3.35768	0.074	0.493	1.15745e-10
A930011G23Rik	3.61017e-15	6.39229	0.262	0	1.17165e-10
Hey2	3.61017e-15	6.24003	0.262	0	1.17165e-10
Fam188a	3.61017e-15	5.96556	0.262	0	1.17165e-10
Fam178a	3.61017e-15	5.78204	0.262	0	1.17165e-10
B2m	3.70749e-15	2.74187	0.533	0.172	1.20323e-10
Ntf3	3.90994e-15	-3.38583	0.066	0.484	1.26893e-10
Actc1	1.87771e-30	1.30071	1	1	6.0939e-26
Paxx	4.22719e-15	-5.65221	0	0.391	1.37189e-10
Slc16a3	4.50752e-15	2.56386	0.516	0.14	1.46287e-10
Serf2	6.07332e-15	0.495135	1	1	1.97103e-10
Fbl	3.34181e-09	1.2978	0.615	0.321	0.000108455
Cavin2	6.77325e-15	-5.81648	0	0.386	2.19819e-10
Kmt5a	6.77325e-15	-5.64107	0	0.386	2.19819e-10
Nfil3	3.56764e-08	-1.39848	0.221	0.526	0.00115784
Phpt1	1.19204e-06	1.26938	0.598	0.405	0.0386866
Sarnp	1.59181e-10	1.26569	0.746	0.507	5.16606e-06
Hmgn1	3.25796e-23	1.25681	0.975	0.86	1.05734e-18
Klhl9	2.12873e-07	1.25645	0.648	0.395	0.00690857
Eif1a	9.96069e-08	-1.39281	0.303	0.577	0.00323264
Pln	8.6139e-15	-0.551059	0.984	1	2.79556e-10
Nufip2	1.66184e-08	-1.39116	0.287	0.595	0.000539333
Prdx2	1.03927e-14	-0.456635	1	1	3.37285e-10
Pvrl3	1.05881e-14	6.16866	0.254	0	3.43625e-10
Large	1.05881e-14	5.77505	0.254	0	3.43625e-10
Ociad1	3.46691e-11	1.2544	0.803	0.642	1.12515e-06
Pelo	1.3411e-14	4.18345	0.311	0.023	4.35239e-10
Rpl31	3.05182e-43	1.25333	1	0.991	9.90436e-39
Galnt18	1.4762e-14	-4.35519	0.025	0.414	4.79085e-10
Csrnp1	1.59455e-14	-3.10628	0.066	0.479	5.17496e-10
Rap1a	8.5264e-14	-1.39036	0.467	0.837	2.76716e-09
Nme1	4.94774e-13	1.24799	0.82	0.633	1.60574e-08
Kmt5b	1.7251e-14	-5.59757	0	0.377	5.59864e-10
Babam2	1.72512e-14	-5.46873	0	0.377	5.59869e-10
Ube2m	2.22505e-21	-1.38211	0.639	0.93	7.22116e-17
Cda	1.77824e-14	4.3385	0.311	0.023	5.77111e-10
Mafb	1.91054e-14	-3.31609	0.074	0.484	6.20045e-10
Zfp207	1.48185e-08	1.24164	0.648	0.4	0.000480921
Atp5g1	1.99156e-14	-0.491997	1	1	6.46341e-10
Fabp3	3.9952e-28	-1.37503	0.967	1	1.2966e-23
Nid2	2.30994e-14	4.36843	0.287	0.014	7.49667e-10
Rasgef1b	8.87279e-07	-1.3723	0.254	0.516	0.0287957
Hnrnpa0	3.44746e-18	-1.36356	0.541	0.912	1.11884e-13
Gpr22	1.13683e-11	-1.36113	0.41	0.767	3.68948e-07
Ppp4r3b	2.74226e-14	-5.57238	0	0.372	8.89972e-10
Ldb3	7.10537e-19	1.22915	0.943	0.851	2.30598e-14
Frmd5	2.85549e-14	4.44533	0.295	0.019	9.26722e-10
Eef1g	3.26709e-23	1.22743	0.975	0.926	1.0603e-18
Cacna2d2	7.36107e-17	-1.35991	0.262	0.795	2.38896e-12
Hdgfrp2	3.08741e-14	5.87965	0.246	0	1.00199e-09
Sepn1	3.08741e-14	5.85197	0.246	0	1.00199e-09
BC030336	3.08741e-14	5.83293	0.246	0	1.00199e-09
Adrbk2	3.08741e-14	5.61305	0.246	0	1.00199e-09
Pxdn	3.54806e-14	2.80364	0.443	0.098	1.15149e-09
Rps3	3.62447e-14	0.505845	0.992	0.995	1.17628e-09
Filip1	3.7222e-11	-1.35627	0.451	0.749	1.208e-06
Eea1	2.80241e-09	-1.35341	0.32	0.642	9.09493e-05
Hnrnpc	1.08284e-12	1.2181	0.828	0.595	3.51426e-08
Hnrnph1	1.68632e-08	1.20483	0.713	0.512	0.000547278
Selenop	4.34772e-14	-5.57928	0	0.367	1.41101e-09
Ccnl1	6.21243e-10	-1.34614	0.377	0.674	2.01618e-05
Egln1	2.37323e-15	-1.34099	0.467	0.851	7.70208e-11
Ears2	4.70566e-14	2.80099	0.492	0.149	1.52717e-09
Mrps31	6.15246e-10	-1.33499	0.279	0.633	1.99672e-05
Mpc2	8.65364e-37	-1.33217	0.951	1	2.80845e-32
Ufc1	1.4021e-15	-1.3164	0.484	0.865	4.55036e-11
Ddx17	1.10202e-08	1.19897	0.689	0.474	0.000357651
Gja3	6.60627e-14	-2.87514	0.074	0.479	2.144e-09
Gjc1	4.50455e-13	-1.31636	0.525	0.842	1.46191e-08
Sobp	2.5973e-08	-1.31395	0.254	0.581	0.000842927
Mia2	6.87514e-14	-5.63761	0	0.363	2.23126e-09
Tdtomato	6.8752e-14	-5.76868	0	0.363	2.23128e-09
Smim27	6.8752e-14	-5.5541	0	0.363	2.23128e-09
Spock2	6.90295e-14	-2.08856	0.066	0.488	2.24028e-09
Col1a1	6.99046e-14	5.57048	0.254	0.005	2.26869e-09
Sdcbp	2.13812e-08	1.18777	0.664	0.423	0.000693905
Rbm8a	2.55045e-09	1.18359	0.73	0.46	8.27724e-05
Tcap	1.39581e-27	-1.31235	0.959	1	4.52998e-23
Serinc3	3.65725e-12	1.18239	0.836	0.656	1.18692e-07
Chchd10	7.82843e-14	-0.393224	0.984	1	2.54064e-09
Acsl1	8.34994e-11	-1.31071	0.295	0.679	2.70989e-06
Fam198b	7.95408e-14	3.38244	0.369	0.06	2.58142e-09
Ccng1	5.8582e-09	1.18061	0.713	0.512	0.000190122
Enho	8.14152e-14	-4.59106	0.016	0.386	2.64225e-09
Ppdpf	5.66306e-11	1.1799	0.779	0.586	1.83789e-06
Ate1	3.83163e-08	-1.30765	0.246	0.558	0.00124352
Gucy1a3	8.9514e-14	5.88082	0.238	0	2.90509e-09
Wbscr22	8.9514e-14	5.82496	0.238	0	2.90509e-09
Hiat1	8.9514e-14	5.73822	0.238	0	2.90509e-09
Erdr1	8.9514e-14	5.73555	0.238	0	2.90509e-09
Fam21	8.9514e-14	5.48664	0.238	0	2.90509e-09
Arhgap29	1.19158e-06	-1.30629	0.246	0.507	0.0386715
Mast2	4.45195e-08	-1.30612	0.287	0.586	0.00144484
Ranbp1	2.95005e-15	1.17383	0.885	0.679	9.5741e-11
Wapl	6.11795e-08	-1.3021	0.279	0.6	0.00198552
Abracl	7.07052e-14	1.17182	0.869	0.721	2.29467e-09
Josd2	4.16762e-09	1.17138	0.746	0.521	0.000135256
Hprt	3.74121e-10	1.17066	0.787	0.586	1.21417e-05
Tnrc6c	1.72931e-07	-1.30049	0.295	0.581	0.0056123
Cyr61	1.00221e-11	-1.29994	0.361	0.772	3.25258e-07
Actn1	1.39455e-13	2.41812	0.516	0.172	4.52586e-09
Cul3	4.91764e-11	-1.29405	0.393	0.716	1.59597e-06
Cap1	1.51597e-13	2.06682	0.533	0.172	4.91994e-09
Arhgef12	3.07727e-12	-1.29364	0.443	0.8	9.98696e-08
Nfe2l1	4.98096e-13	-1.28544	0.443	0.786	1.61652e-08
Dlc1	2.33594e-18	-1.28111	0.639	0.94	7.58104e-14
Rsu1	7.68785e-07	1.16826	0.648	0.437	0.0249502
BC005537	3.45526e-08	1.16673	0.656	0.405	0.00112137
Scd2	8.00883e-14	1.16538	0.869	0.712	2.59919e-09
Snrnp27	9.06913e-08	1.16492	0.68	0.456	0.00294329
Pfdn5	1.89973e-13	-0.549063	0.975	1	6.1654e-09
Arid4a	1.8827e-07	-1.27989	0.254	0.563	0.00611011
Nudt3	3.99005e-12	-1.27938	0.492	0.777	1.29493e-07
Msn	1.25403e-10	1.15892	0.762	0.516	4.06982e-06
Tceal7	2.21449e-13	3.96675	0.336	0.042	7.18689e-09
Atp5f1	2.41276e-13	-0.462262	0.992	1	7.83036e-09
Celf1	1.29513e-10	1.15532	0.795	0.605	4.2032e-06
Tmem35	2.58071e-13	5.78045	0.23	0	8.37543e-09
Mettl10	2.58071e-13	5.7715	0.23	0	8.37543e-09
1110037F02Rik	2.58071e-13	5.64807	0.23	0	8.37543e-09
Lta4h	2.66459e-13	2.96238	0.467	0.135	8.64767e-09
Chpt1	3.41959e-12	-1.27784	0.443	0.795	1.10979e-07
Rpl37a	3.74059e-48	1.15159	1	1	1.21397e-43
Enah	1.39195e-10	1.14739	0.811	0.609	4.51744e-06
Bcl7c	1.81634e-09	-1.2741	0.311	0.674	5.89476e-05
Vdac1	3.32262e-13	-0.522725	0.975	0.995	1.07832e-08
Mob1b	8.55799e-08	1.14687	0.656	0.423	0.00277741
P4hb	3.14767e-09	1.14585	0.697	0.474	0.000102155
Rps19	1.6217e-38	1.14308	1	0.995	5.26307e-34
Ppp1r14c	5.11787e-29	-1.27343	0.943	1	1.66095e-24
Eef1akmt1	4.19021e-13	-5.38999	0	0.344	1.35989e-08
Fam173a	4.26484e-10	-1.27024	0.328	0.665	1.38411e-05
Pdgfa	1.63154e-15	-1.26098	0.582	0.907	5.295e-11
Rpl11	1.3359e-44	1.13979	0.992	1	4.33552e-40
Serpinb6b	4.92155e-13	2.15849	0.557	0.214	1.59724e-08
Vamp2	1.60793e-08	1.13786	0.705	0.474	0.000521838
Ndfip1	5.81763e-08	-1.25931	0.221	0.535	0.00188805
Ankrd40	3.4189e-12	-1.2535	0.443	0.791	1.10957e-07
Limd1	5.69443e-08	1.1352	0.648	0.377	0.00184807
Xpr1	5.45168e-13	2.07757	0.549	0.214	1.76929e-08
Hint1	5.46729e-13	-0.459724	0.992	1	1.77435e-08
Ndufa13	5.51422e-13	-0.39621	1	1	1.78958e-08
Gas6	6.66428e-10	1.12477	0.828	0.651	2.16282e-05
Sema3c	1.20959e-11	-1.24716	0.418	0.8	3.92559e-07
Ufd1	6.54221e-13	-5.45456	0	0.34	2.12321e-08
Abhd17c	6.72381e-13	2.27359	0.484	0.149	2.18214e-08
Fam73a	7.39896e-13	5.56086	0.221	0	2.40126e-08
Klf6	2.29158e-09	-1.24519	0.402	0.712	7.4371e-05
Sap30l	8.62932e-13	-2.29657	0.098	0.493	2.80056e-08
Dcpp3	8.94432e-13	-7.22795	0.008	0.349	2.90279e-08
Arf2	3.70747e-07	-1.24151	0.221	0.512	0.0120322
Hnrnpm	6.86172e-07	1.12463	0.648	0.46	0.022269
Cenpb	5.81461e-07	-1.23647	0.336	0.595	0.0188707
Jph2	3.66593e-07	1.12095	0.664	0.433	0.0118974
Rpl3	1.11101e-12	0.42682	1	1	3.60568e-08
Mcam	1.2339e-12	2.26474	0.508	0.177	4.00452e-08
Tmem9b	1.28504e-12	2.04734	0.508	0.158	4.17047e-08
Plp2	1.30123e-12	2.42999	0.443	0.116	4.22302e-08
Mgp	5.63313e-11	-1.23452	0.582	0.856	1.82818e-06
Arhgap5	5.17044e-12	-1.23192	0.566	0.837	1.67801e-07
Eid1	8.33926e-29	-1.23174	0.885	0.981	2.70642e-24
Col1a2	1.40476e-12	6.23064	0.23	0.005	4.55901e-08
mt-Nd2	8.61549e-42	-1.23099	1	1	2.79607e-37
Prss23	1.60347e-12	3.70272	0.328	0.051	5.20389e-08
Rpl39	9.5454e-45	1.12004	1	1	3.09786e-40
Ppp4c	1.66568e-12	2.08477	0.516	0.167	5.40579e-08
Slc25a3	1.92515e-12	-0.416804	1	1	6.24787e-08
Pkp2	1.52135e-11	1.1131	0.803	0.628	4.93739e-07
Chd2	5.60413e-07	-1.23029	0.254	0.526	0.0181876
Wash1	2.1097e-12	5.59544	0.213	0	6.84681e-08
Ept1	2.1097e-12	5.35962	0.213	0	6.84681e-08
Ubb	2.36815e-41	-1.22683	1	1	7.68561e-37
Senp6	2.00924e-13	-1.21616	0.574	0.837	6.5208e-09
Arpc1b	2.43889e-12	2.21409	0.5	0.172	7.91517e-08
Abraxas2	2.45307e-12	-5.20476	0	0.326	7.9612e-08
Dusp6	2.63503e-12	-2.95964	0.066	0.433	8.55172e-08
Rrad	3.32366e-15	-1.21274	0.951	0.986	1.07866e-10
Nkiras1	1.30376e-07	-1.20512	0.238	0.54	0.00423122
Gm10320	3.25583e-12	4.44804	0.238	0.009	1.05665e-07
Mtpn	1.41858e-08	1.10564	0.68	0.442	0.000460387
Shisa4	4.1648e-09	-1.20042	0.377	0.707	0.000135164
Zfp326	7.83033e-09	-1.19886	0.361	0.651	0.000254126
Atf4	3.72818e-09	-1.19709	0.426	0.74	0.000120994
Nudcd3	1.07463e-06	1.10174	0.631	0.405	0.0348762
Ppp1r14b	1.6651e-21	-1.19317	0.795	0.963	5.40391e-17
Inpp4b	4.05833e-12	-3.28176	0.016	0.358	1.31709e-07
Rps4x	4.0763e-12	0.38832	1	1	1.32292e-07
Fermt2	1.40253e-22	-1.19234	0.803	0.981	4.55177e-18
Stmn4	4.64456e-12	5.88301	0.221	0.005	1.50735e-07
Rock2	8.56466e-12	-1.19038	0.574	0.8	2.77958e-07
Rec114	4.87283e-12	2.64175	0.402	0.093	1.58143e-07
Timm10b	8.79935e-07	1.10097	0.607	0.381	0.0285574
Malat1	8.3923e-30	-1.18286	1	1	2.72364e-25
Cmtm7	5.23439e-12	2.24498	0.418	0.098	1.69877e-07
Smyd2	1.51427e-07	1.0994	0.689	0.526	0.00491442
Rrbp1	5.30043e-14	-1.1818	0.656	0.856	1.7202e-09
Btbd7	5.67072e-12	-2.50746	0.082	0.451	1.84037e-07
Scn10a	5.84859e-12	-5.31037	0	0.316	1.8981e-07
Gm11744	5.98308e-12	5.90453	0.205	0	1.94175e-07
2310015A10Rik	5.98308e-12	5.87202	0.205	0	1.94175e-07
Commd5	5.98308e-12	5.70486	0.205	0	1.94175e-07
Obfc1	5.98308e-12	5.59968	0.205	0	1.94175e-07
Ctage5	5.98308e-12	5.57597	0.205	0	1.94175e-07
Ccbl1	5.98308e-12	5.5703	0.205	0	1.94175e-07
Cisd2	7.99802e-09	1.09286	0.705	0.465	0.000259568
Atp5d	6.19131e-12	-0.426623	0.992	1	2.00933e-07
Klf10	6.64381e-12	-2.77039	0.082	0.442	2.15618e-07
Tmem163	6.6674e-12	-3.63831	0.033	0.372	2.16384e-07
Shmt2	6.81858e-12	2.78367	0.336	0.056	2.2129e-07
Cd44	6.86547e-12	3.62055	0.287	0.033	2.22812e-07
Sorbs1	7.06928e-12	-2.89697	0.033	0.381	2.29426e-07
Atp5c1	7.34663e-12	-0.325406	0.992	1	2.38428e-07
Hypk	2.20182e-07	1.09252	0.639	0.414	0.0071458
Vgll4	1.21943e-07	-1.18173	0.246	0.535	0.00395754
Nectin3	8.99793e-12	-5.06266	0	0.312	2.92019e-07
Taf7	1.00484e-06	-1.17181	0.279	0.563	0.032611
Hbegf	3.45254e-09	-1.16092	0.41	0.74	0.000112049
Igfbp7	9.17924e-08	-1.15867	0.393	0.642	0.00297903
Cdon	1.18612e-11	2.29112	0.451	0.135	3.84942e-07
Hspb3	9.54455e-13	-1.14805	0.451	0.823	3.09759e-08
Fam177a	1.28552e-11	4.67857	0.213	0.005	4.17204e-07
Anxa5	1.17567e-13	1.08863	0.926	0.749	3.81551e-09
Nsd3	1.38102e-11	-5.46175	0	0.307	4.48197e-07
Rtl8b	1.38102e-11	-5.10866	0	0.307	4.48197e-07
Rps15	4.42384e-42	1.08619	1	1	1.43571e-37
Grb2	9.20855e-14	-1.14772	0.574	0.865	2.98854e-09
Dtnbp1	6.56516e-09	-1.1449	0.41	0.712	0.000213066
Nebl	1.5381e-22	-1.14279	0.852	0.991	4.99175e-18
Rpl41	6.68016e-46	1.08483	1	1	2.16798e-41
Pddc1	1.68781e-11	5.70806	0.197	0	5.47761e-07
1810026J23Rik	1.68781e-11	5.65756	0.197	0	5.47761e-07
Fam73b	1.68781e-11	5.52293	0.197	0	5.47761e-07
C330006A16Rik	1.68781e-11	5.48515	0.197	0	5.47761e-07
Gm13251	1.68781e-11	5.46289	0.197	0	5.47761e-07
Rpl14	1.42592e-42	1.08229	1	1	4.62767e-38
Lama2	1.17619e-06	-1.13084	0.279	0.54	0.038172
Syngr1	1.2342e-09	-1.12422	0.336	0.665	4.00548e-05
Ubl7	2.06857e-11	2.12176	0.516	0.2	6.71335e-07
Eln	2.1381e-11	3.78193	0.352	0.074	6.93898e-07
Cdc37l1	2.64153e-07	-1.12242	0.32	0.6	0.00857283
Ywhae	2.18483e-11	0.539244	0.984	0.995	7.09066e-07
Kcmf1	6.48817e-08	-1.11549	0.402	0.679	0.00210567
Dhrs7c	2.59209e-07	-1.11285	0.311	0.628	0.00841237
Dhrs4	3.12231e-07	-1.10637	0.279	0.577	0.0101331
Zcrb1	1.25448e-18	-1.09676	0.779	0.93	4.07129e-14
Cttn	3.15292e-11	1.7723	0.549	0.228	1.02325e-06
Gm26735	3.23016e-11	-5.31924	0	0.298	1.04832e-06
Eloa	3.23016e-11	-5.09292	0	0.298	1.04832e-06
Col18a1	3.25037e-11	5.57686	0.205	0.005	1.05487e-06
Hdac2	3.03997e-09	1.07427	0.738	0.507	9.86592e-05
Adssl1	7.11159e-09	-1.09603	0.443	0.73	0.0002308
Ddx6	3.6985e-07	-1.09503	0.352	0.633	0.0120031
Aldoa	2.9665e-26	1.05892	1	1	9.62748e-22
Cfl1	1.18413e-24	1.04895	0.975	0.953	3.84298e-20
Pcbp4	1.09743e-06	1.04361	0.623	0.391	0.035616
Nr4a1	4.62888e-11	-2.47353	0.098	0.437	1.50226e-06
AK010878	4.73649e-11	5.45777	0.189	0	1.53718e-06
Tceb3	4.73649e-11	5.43852	0.189	0	1.53718e-06
Cdh3	4.73649e-11	5.39394	0.189	0	1.53718e-06
Hgs	4.73649e-11	5.38734	0.189	0	1.53718e-06
Vwa9	4.73649e-11	5.28664	0.189	0	1.53718e-06
Prr13	4.76482e-11	1.87457	0.549	0.251	1.54637e-06
Fth1	4.22029e-47	-1.08963	1	1	1.36965e-42
Tnnc1	4.98003e-11	0.472964	0.984	0.991	1.61622e-06
Mrpl36	5.77518e-10	1.04091	0.828	0.66	1.87428e-05
Pxdc1	5.18804e-11	-2.4879	0.107	0.451	1.68373e-06
Dhx36	3.83322e-08	-1.0879	0.352	0.665	0.00124403
Rasl11b	5.45603e-10	-1.08442	0.631	0.837	1.7707e-05
Cdh2	9.87279e-16	1.03718	0.943	0.847	3.20411e-11
Hfe2	5.59098e-11	-2.04421	0.107	0.46	1.8145e-06
C1qtnf4	1.37558e-10	-1.07825	0.566	0.847	4.4643e-06
Gm10073	2.06694e-09	1.0318	0.754	0.591	6.70803e-05
Dnmt3a	5.24851e-07	1.03108	0.672	0.456	0.0170335
Gnai1	6.52894e-07	-1.06494	0.328	0.605	0.021189
Capzb	4.15516e-15	1.02908	0.934	0.749	1.34852e-10
Adgrb2	6.15289e-11	-1.95908	0.107	0.47	1.99686e-06
Aplp2	1.08914e-09	1.0221	0.795	0.633	3.53469e-05
Eef2	6.60027e-28	1.00765	1	0.986	2.14205e-23
Slc25a5	6.93381e-11	0.462758	1	0.995	2.2503e-06
Pafah1b1	9.7153e-19	-1.06317	0.82	0.967	3.153e-14
Dcun1d1	7.3297e-11	1.91723	0.5	0.181	2.37878e-06
Ppp1r2	1.7335e-14	-1.06158	0.689	0.907	5.62589e-10
Cop1	7.4848e-11	-5.30576	0	0.288	2.42912e-06
Nsd2	7.4848e-11	-5.03438	0	0.288	2.42912e-06
Dgcr6	9.99863e-11	-1.05879	0.41	0.735	3.24496e-06
Bri3	8.98465e-11	-0.463183	0.959	1	2.91588e-06
Ddah1	9.3757e-11	2.3501	0.352	0.074	3.04279e-06
Eif3l	9.03849e-08	1.00624	0.689	0.451	0.00293335
Eno3	9.70445e-11	-0.567195	0.967	0.995	3.14948e-06
Tspan6	9.72755e-11	2.45367	0.377	0.098	3.15698e-06
Rplp0	9.93191e-11	-0.358197	1	1	3.2233e-06
Pten	7.431e-07	-1.05858	0.369	0.633	0.0241166
Kcnmb4	1.00303e-10	-2.17121	0.098	0.442	3.25522e-06
Lrrc10	3.62462e-11	-1.05805	0.705	0.898	1.17633e-06
Gm1673	1.78251e-07	-1.0491	0.344	0.642	0.00578497
Axl	1.19638e-10	2.49402	0.344	0.074	3.88273e-06
Ptges	1.21878e-10	-2.24435	0.107	0.447	3.95543e-06
Dsp	1.39777e-09	1.00565	0.82	0.688	4.53633e-05
Psme2	4.27355e-08	1.0043	0.73	0.512	0.00138694
Cst3	1.414e-24	-1.04824	0.992	1	4.589e-20
Ctnnb1	4.6876e-13	1.00091	0.885	0.753	1.52132e-08
Cnih1	1.46983e-08	0.998124	0.762	0.563	0.000477018
Procr	1.32242e-10	5.49407	0.18	0	4.29179e-06
Hnrnpk	7.58781e-20	0.992646	0.984	0.907	2.46255e-15
Timm17a	3.22065e-20	-1.04775	0.811	0.981	1.04523e-15
Celf2	6.19178e-09	0.987198	0.77	0.67	0.000200948
Ubtd1	1.4832e-10	-2.06254	0.139	0.488	4.81358e-06
Pcm1	4.14621e-09	-1.04727	0.59	0.781	0.000134561
Got1	1.15211e-16	-1.04408	0.787	0.967	3.73907e-12
Trp53inp2	1.29521e-07	0.980493	0.746	0.595	0.00420347
Rras2	1.63904e-10	1.61202	0.582	0.279	5.31934e-06
Hadha	1.55239e-13	-1.03924	0.787	0.926	5.03814e-09
Grk2	1.71842e-10	-4.98081	0	0.279	5.57696e-06
Retreg2	1.71843e-10	-4.96893	0	0.279	5.577e-06
Cryab	1.72276e-10	-0.495748	1	1	5.59106e-06
Hsdl2	3.34182e-08	-1.03419	0.418	0.716	0.00108455
Lamtor3	1.75007e-10	-2.20236	0.139	0.47	5.67967e-06
Ndufa7	1.80309e-10	-0.413181	0.975	1	5.85173e-06
Ttc12	1.8044e-10	-2.9792	0.033	0.344	5.856e-06
Igsf1	1.82481e-10	-3.63608	0.016	0.312	5.92222e-06
Gm15543	1.83273e-10	-3.51225	0.033	0.335	5.94795e-06
Mark3	3.38741e-07	-1.03176	0.402	0.684	0.0109935
Igf1	1.93105e-10	3.34518	0.303	0.056	6.26703e-06
Thbs1	1.99184e-10	2.8963	0.32	0.06	6.46432e-06
Zfand5	7.88296e-14	-1.02184	0.77	0.935	2.55834e-09
Yae1d1	1.13154e-07	-1.01379	0.459	0.707	0.0036723
Eid2	2.2716e-10	-2.16953	0.107	0.447	7.37224e-06
Hint3	1.2828e-07	-1.00849	0.361	0.642	0.00416318
Tcea3	8.48958e-09	-1.00296	0.525	0.777	0.000275521
Gon7	2.59493e-10	-5.03642	0	0.274	8.4216e-06
Zbed3	2.59493e-10	2.47154	0.344	0.079	8.4216e-06
Suclg1	2.70029e-10	-0.556138	0.943	0.986	8.76351e-06
Glipr2	2.83254e-10	2.83547	0.311	0.06	9.19273e-06
Ckb	1.01023e-12	-1.00237	0.713	0.921	3.27859e-08
Vdac3	6.39671e-23	-1.00072	0.877	0.995	2.07599e-18
Snrpa	3.05446e-10	2.12074	0.492	0.195	9.91294e-06
Asb11	4.33637e-07	-0.994864	0.418	0.707	0.0140732
Pgp	1.79693e-08	-0.992394	0.533	0.781	0.000583175
Tmx4	2.44222e-11	-0.991017	0.59	0.851	7.92598e-07
Ddx26b	3.67379e-10	5.53296	0.172	0	1.19229e-05
Atn1.1	3.67379e-10	5.41241	0.172	0	1.19229e-05
BC023829	3.67379e-10	5.30084	0.172	0	1.19229e-05
Lnp	3.67379e-10	5.25187	0.172	0	1.19229e-05
Hiatl1	3.67379e-10	5.1122	0.172	0	1.19229e-05
D930015E06Rik	3.67379e-10	5.07195	0.172	0	1.19229e-05
Gm21967	3.67379e-10	5.03179	0.172	0	1.19229e-05
A230046K03Rik	3.67379e-10	5.0101	0.172	0	1.19229e-05
Rab6a	3.14191e-08	0.980274	0.754	0.544	0.00101967
Cltc	5.42613e-08	0.979074	0.787	0.66	0.00176099
Mfap4	3.87908e-10	3.97918	0.287	0.051	1.25892e-05
Cavin3	3.90969e-10	-5.1494	0	0.27	1.26885e-05
Rbmxl1	3.91445e-10	2.00497	0.467	0.181	1.2704e-05
1010001N08Rik	3.92538e-10	3.37585	0.246	0.028	1.27394e-05
Lmod3	3.99884e-10	3.12342	0.344	0.093	1.29778e-05
Dab2ip	6.04012e-07	-0.987552	0.426	0.67	0.0196026
Coq7	1.52162e-13	-0.986498	0.648	0.921	4.93825e-09
Atxn2	9.03069e-07	-0.986345	0.402	0.66	0.0293082
Rpl10a	3.24734e-36	0.970286	1	0.995	1.05389e-31
4921524J17Rik	3.06875e-09	-0.985939	0.467	0.767	9.95934e-05
Fkbp3	5.81936e-22	-0.983006	0.918	0.991	1.88862e-17
Fam122b	5.0701e-10	3.17457	0.295	0.056	1.64545e-05
Exoc3	1.53334e-06	-0.982549	0.426	0.67	0.049763
Rbbp7	5.69183e-11	0.970105	0.852	0.716	1.84723e-06
Popdc3	5.60016e-10	1.56487	0.541	0.237	1.81748e-05
Nsd1	8.42874e-07	-0.974674	0.361	0.656	0.0273546
Crim1	5.65844e-10	-3.84811	0.025	0.307	1.83639e-05
Hsp90aa1	2.2794e-18	0.969275	1	0.958	7.39758e-14
Gm10602	5.87744e-10	-5.04969	0	0.265	1.90747e-05
Tcim	5.87744e-10	-5.04955	0	0.265	1.90747e-05
Zfp445	5.87744e-10	-5.00786	0	0.265	1.90747e-05
Gm11361	5.87744e-10	-4.92764	0	0.265	1.90747e-05
Drap1	1.30649e-12	-0.973262	0.73	0.944	4.24009e-08
Psmd12	1.50255e-10	-0.973107	0.607	0.8	4.87637e-06
Ergic3	1.25251e-07	0.961652	0.738	0.549	0.0040649
Nisch	9.76289e-10	0.957176	0.82	0.656	3.16845e-05
Cyhr1	6.86178e-08	-0.967795	0.443	0.688	0.00222692
Raly	1.46865e-07	0.956284	0.828	0.637	0.00476635
Dazap2	8.93238e-09	0.954366	0.787	0.623	0.000289892
Jph1	7.31669e-10	-2.73675	0.049	0.353	2.37456e-05
Sbk2	8.42807e-10	-4.14736	0.008	0.279	2.73524e-05
Plpbp	8.81602e-10	-4.96838	0	0.26	2.86115e-05
Bud23	8.81602e-10	-4.893	0	0.26	2.86115e-05
Dmac2	8.81602e-10	-4.65313	0	0.26	2.86115e-05
Rpl18a	9.13523e-41	0.950031	1	1	2.96475e-36
Rpl23a	1.81562e-30	0.948601	1	0.995	5.89241e-26
Col3a1	9.14342e-10	4.38212	0.205	0.014	2.9674e-05
Adam9	9.37694e-10	2.06894	0.434	0.153	3.04319e-05
Macf1	2.84987e-10	-0.965185	0.73	0.916	9.24897e-06
Eif4a2	4.32112e-10	0.936857	0.885	0.777	1.40238e-05
Arpc5	4.38144e-09	0.933609	0.811	0.572	0.000142195
Gm10260	8.15847e-17	0.932899	0.992	0.874	2.64775e-12
Tpm3-rs7	1.01564e-09	5.46357	0.164	0	3.29616e-05
Fam65a	1.01564e-09	5.22652	0.164	0	3.29616e-05
Fam134c	1.01564e-09	5.21523	0.164	0	3.29616e-05
Hrsp12	1.01564e-09	5.15337	0.164	0	3.29616e-05
Lipo1	1.01564e-09	5.15172	0.164	0	3.29616e-05
Ccni	2.1972e-07	0.925514	0.787	0.614	0.0071308
Prkd3	1.0846e-09	2.27052	0.361	0.098	3.51996e-05
Mtch2	6.43747e-10	0.921215	0.861	0.749	2.08922e-05
Cobl	1.1588e-09	2.55639	0.32	0.07	3.76075e-05
Mrps34	2.2982e-10	-0.963913	0.582	0.86	7.45858e-06
Limk2	1.16724e-09	2.21139	0.426	0.153	3.78817e-05
Glrx2	1.15961e-09	-0.963901	0.607	0.847	3.76338e-05
Uchl1	3.42383e-10	-0.960914	0.557	0.837	1.11117e-05
Cox7b	3.47449e-32	-0.958132	0.992	1	1.12761e-27
2300009A05Rik	2.26991e-09	-0.954008	0.59	0.814	7.36677e-05
Hras	1.86209e-07	-0.952829	0.508	0.772	0.00604323
Timm29	1.31947e-09	-5.0009	0	0.256	4.28221e-05
Tsc22d4	1.35361e-12	-0.950652	0.689	0.907	4.393e-08
Hif3a	1.38809e-09	2.47475	0.336	0.084	4.50489e-05
Cmss1	1.3957e-09	-2.38735	0.082	0.391	4.52961e-05
Lgals1	4.12119e-11	0.920472	0.959	0.86	1.33749e-06
Uqcrc1	1.40927e-09	0.576502	0.975	0.981	4.57364e-05
Pcbp1	3.73384e-11	0.917185	0.918	0.819	1.21178e-06
Acyp2	5.80679e-07	-0.949642	0.484	0.73	0.0188453
Krt222	1.48225e-09	-3.58937	0.025	0.298	4.81051e-05
Rpl19	1.52051e-09	-0.267551	1	0.995	4.93466e-05
Zfand6	6.39315e-09	0.910964	0.844	0.684	0.000207483
Ndufa1	1.59919e-09	-0.414302	0.984	1	5.19e-05
Rpl30	5.63241e-36	-0.949613	1	1	1.82794e-31
Coro1b	1.68542e-09	2.12881	0.41	0.135	5.46985e-05
Uba3	1.68918e-09	1.48198	0.566	0.27	5.48207e-05
Klhdc8b	1.58176e-13	-0.947903	0.705	0.93	5.13345e-09
Lamb1	1.92454e-09	1.68838	0.5	0.205	6.24589e-05
Krt18	1.9663e-09	3.07752	0.262	0.042	6.38142e-05
Gucy1a1	1.97055e-09	-5.10585	0	0.251	6.39522e-05
Fut8	2.04121e-09	-2.11726	0.123	0.437	6.62453e-05
Synpo2l	6.83045e-10	0.910394	0.91	0.786	2.21675e-05
Tor1aip2	2.09816e-09	1.48617	0.566	0.26	6.80935e-05
Rpl9-ps6	2.1164e-09	2.05543	0.459	0.186	6.86858e-05
Yy1	5.4806e-07	-0.947624	0.41	0.674	0.0177868
Atp1a2	2.2531e-10	-0.946267	0.574	0.87	7.3122e-06
Ndufb10	7.7277e-27	-0.942865	0.984	0.995	2.50795e-22
Rap1gap	2.33854e-09	-2.44102	0.066	0.363	7.58949e-05
Sf3b4	2.39503e-09	1.92873	0.443	0.167	7.77283e-05
Fam120a	2.48452e-09	1.51325	0.549	0.265	8.06325e-05
Mybpc3	3.46124e-16	0.901789	0.975	0.912	1.12331e-11
Sgce	2.57706e-09	1.91276	0.402	0.13	8.36358e-05
Ndufa12	2.63926e-09	-0.42023	0.992	1	8.56545e-05
Mpc1	1.76634e-18	-0.934341	0.861	0.986	5.73247e-14
Ctxn1	2.75565e-09	1.87441	0.492	0.205	8.94318e-05
Fam175b	2.79453e-09	5.51432	0.156	0	9.06935e-05
PISD	2.79453e-09	5.38795	0.156	0	9.06935e-05
Gm10263	2.79453e-09	5.27848	0.156	0	9.06935e-05
Suv420h2	2.79453e-09	5.27729	0.156	0	9.06935e-05
Vprbp	2.79453e-09	5.25703	0.156	0	9.06935e-05
Ifi30	2.79453e-09	5.24608	0.156	0	9.06935e-05
Adck3	2.79453e-09	5.23601	0.156	0	9.06935e-05
Nutf2	2.79453e-09	5.16014	0.156	0	9.06935e-05
Pacrgl	2.79453e-09	5.15951	0.156	0	9.06935e-05
Fam132a	2.79453e-09	5.06621	0.156	0	9.06935e-05
Wbscr16	2.79453e-09	5.05003	0.156	0	9.06935e-05
Fam179b	2.79453e-09	5.027	0.156	0	9.06935e-05
Mina	2.79453e-09	4.79193	0.156	0	9.06935e-05
Malsu1	7.43782e-07	-0.932361	0.369	0.656	0.0241387
Hmgcr	2.84624e-09	-1.84155	0.18	0.493	9.2372e-05
Gm9493	2.86453e-09	1.91698	0.467	0.191	9.29654e-05
Fat1	2.9032e-09	1.74055	0.541	0.265	9.42203e-05
Rab11fip5	2.93197e-09	1.63476	0.516	0.223	9.51542e-05
Garem1	2.93651e-09	-4.73794	0	0.247	9.53015e-05
Smim14	1.41331e-09	0.881017	0.918	0.8	4.58675e-05
Mylk3	1.33862e-12	-0.930854	0.738	0.921	4.34437e-08
Rac1	8.31509e-09	0.877936	0.844	0.702	0.000269858
Eif3e	4.99249e-11	0.870352	0.943	0.805	1.62026e-06
Rogdi	3.295e-09	2.07931	0.385	0.126	0.000106936
Gnb1	8.88464e-10	0.869305	0.82	0.716	2.88342e-05
Slc38a2	7.92242e-13	-0.929001	0.738	0.953	2.57114e-08
Rpl7a-ps5	3.46354e-09	3.56392	0.205	0.019	0.000112406
Adam19	3.58501e-09	2.82356	0.311	0.079	0.000116348
Tns1	9.62762e-10	0.865732	0.893	0.679	3.12455e-05
Arhgap31	6.44373e-07	0.861096	0.762	0.549	0.0209125
Meg3	4.10619e-10	-0.927036	0.779	0.926	1.33262e-05
Tmem176a	5.2258e-08	-0.925027	0.516	0.781	0.00169598
Kcnk3	8.42208e-08	-0.922948	0.377	0.684	0.0027333
Grpel1	2.80871e-11	-0.920836	0.672	0.898	9.11539e-07
Tmem258	6.04832e-13	0.860419	0.943	0.847	1.96292e-08
Stxbp2	4.18089e-09	3.56964	0.205	0.019	0.000135687
Gm8186	4.23071e-09	2.6018	0.352	0.107	0.000137303
Hmgb3	2.14456e-09	-0.908641	0.672	0.856	6.95996e-05
mt-Nd3	6.66556e-19	0.859976	1	0.972	2.16324e-14
Prkaa2	4.41653e-09	1.51412	0.557	0.284	0.000143334
Lmo2	4.49254e-09	-2.88529	0.057	0.344	0.000145801
Csnk2a1	4.58858e-09	1.45043	0.541	0.265	0.000148918
Hba-a2	4.72342e-09	3.89577	0.18	0.009	0.000153294
Ccdc85b	4.92324e-09	-1.79028	0.123	0.447	0.000159779
Synpo	4.95582e-09	2.90643	0.262	0.047	0.000160836
Rps14	3.69325e-39	0.859448	1	1	1.19861e-34
Sept1	5.00118e-09	2.88242	0.27	0.051	0.000162308
Raph1	5.03333e-09	2.08638	0.5	0.223	0.000163352
Itm2b	2.06758e-18	-0.898204	0.951	0.995	6.71011e-14
Gdi1	5.18745e-09	1.77692	0.492	0.219	0.000168354
Elf4	5.27144e-09	3.76639	0.18	0.009	0.000171079
Rgs2	5.27282e-09	-2.57583	0.066	0.353	0.000171124
Spcs3	5.33767e-09	1.86198	0.361	0.102	0.000173229
Map2k1	5.57489e-09	1.50122	0.574	0.288	0.000180927
Ndufb3	5.71727e-09	-0.540292	0.918	0.981	0.000185548
Fahd2a	5.7374e-09	-1.86012	0.189	0.488	0.000186201
Ndufa3	7.38619e-22	0.841946	0.967	0.972	2.39711e-17
mt-Atp8	1.25874e-09	-0.894043	0.615	0.833	4.08513e-05
Gramd1b	6.01107e-09	-2.89303	0.041	0.312	0.000195083
Eif3h	1.75219e-13	0.840846	0.992	0.935	5.68656e-09
Ppp1cc	1.31704e-10	0.835473	0.918	0.758	4.27432e-06
Gm30025	6.47961e-09	-4.87371	0	0.237	0.000210289
Fibp	1.33288e-09	-0.892012	0.664	0.888	4.32574e-05
Mvd	6.60948e-09	-2.17986	0.057	0.349	0.000214504
Tacc2	6.61168e-09	1.55272	0.508	0.233	0.000214576
Ybx3	2.69522e-09	-0.888855	0.639	0.865	8.74708e-05
Tgfbr1	6.84861e-09	2.01342	0.402	0.144	0.000222265
Cxcl1	6.86316e-09	-4.5828	0.016	0.265	0.000222737
Ppp1r10	6.98534e-09	-2.04525	0.139	0.437	0.000226702
Dbi	1.68334e-19	-0.881267	0.975	0.995	5.46312e-15
Sod2	6.15825e-27	-0.880904	0.959	0.995	1.9986e-22
Adprhl1	3.98816e-18	-0.878942	0.926	1	1.29432e-13
Serpinh1	3.51038e-13	0.835321	0.959	0.912	1.13926e-08
Myl2	7.34963e-09	0.378594	0.992	1	0.000238525
Tusc3	4.35684e-07	-0.874518	0.475	0.758	0.0141397
Fam175a	7.65392e-09	5.07258	0.148	0	0.0002484
Mesdc1	7.65392e-09	5.06279	0.148	0	0.0002484
Lpl	3.91921e-19	-0.873355	0.918	0.995	1.27194e-14
Rpl22l1	6.0825e-11	0.827393	0.959	0.944	1.97401e-06
Lbh	1.67687e-11	0.826896	0.959	0.907	5.44211e-07
Spop	9.44257e-10	-0.866539	0.582	0.823	3.06449e-05
Rps17	2.37365e-32	0.82269	1	1	7.70343e-28
Adnp	9.59467e-09	-4.78381	0	0.233	0.000311385
Bmt2	9.59467e-09	-4.63897	0	0.233	0.000311385
Hdgfl2	9.59474e-09	-4.76026	0	0.233	0.000311388
Gsto1	9.60669e-09	1.95461	0.434	0.177	0.000311775
Ndufb4	1.37671e-26	-0.865863	0.975	1	4.46798e-22
Eif4ebp2	9.97806e-09	-1.87787	0.066	0.353	0.000323828
Ephb1	1.01166e-08	-4.51234	0.008	0.247	0.000328324
Ndufa8	1.02636e-08	-0.427672	0.984	0.991	0.000333096
Fus	1.03692e-08	0.822012	0.869	0.767	0.000336521
Ywhag	1.43575e-06	0.821574	0.738	0.581	0.0465959
Plaa	1.11705e-08	1.71153	0.492	0.237	0.000362529
Slit2	1.20559e-08	-2.59905	0.074	0.349	0.000391261
Gm13212	1.20795e-08	3.55886	0.205	0.023	0.000392027
Tmem38a	3.42117e-08	-0.864222	0.598	0.847	0.00111031
Sat1	1.27085e-08	-2.06208	0.131	0.433	0.000412442
Lsmem1	1.36202e-08	-1.92096	0.123	0.423	0.000442031
Thsd7a	1.40501e-08	2.7616	0.262	0.051	0.000455983
Erg28	1.41779e-08	-4.79747	0	0.228	0.000460128
Tug1	1.41779e-08	-4.93263	0	0.228	0.000460131
Grk3	1.41779e-08	-4.72118	0	0.228	0.000460131
Cd63	2.12108e-13	0.816771	0.984	0.935	6.88376e-09
Popdc2	2.37449e-07	0.811959	0.82	0.753	0.00770618
Rabac1	1.47515e-08	-0.543143	0.91	0.972	0.000478746
Dynlrb1	3.89394e-14	0.809184	0.975	0.893	1.26374e-09
Tagln2	1.52049e-08	2.80386	0.361	0.116	0.000493461
Pitx2	1.55666e-08	5.93492	0.156	0.005	0.000505199
Anxa6	8.79725e-07	0.80532	0.82	0.651	0.0285506
Myoz1	1.62617e-08	-1.75215	0.18	0.488	0.000527758
Ptp4a2	2.961e-12	-0.859591	0.852	0.967	9.60963e-08
Rpl37	8.12261e-36	0.803926	1	1	2.63611e-31
C530008M17Rik	1.69072e-08	4.63301	0.156	0.005	0.000548706
Hnrnpa2b1	8.16195e-14	0.785181	0.967	0.949	2.64888e-09
Spon1	1.72673e-08	3.04588	0.205	0.023	0.000560394
Vkorc1	1.73905e-08	2.75312	0.287	0.07	0.000564392
Amer1	1.77225e-08	-1.98742	0.123	0.423	0.000575166
Hk2	1.78473e-08	1.99424	0.41	0.153	0.000579216
Pink1	3.52619e-07	-0.856755	0.557	0.786	0.0114439
Rps8	4.45409e-36	0.784849	1	1	1.44553e-31
Bgn	1.83596e-08	5.18012	0.156	0.005	0.000595844
Acadvl	1.19308e-09	-0.84886	0.689	0.893	3.87201e-05
Phb	1.40118e-07	-0.843479	0.541	0.781	0.00454738
Adamts8	1.92057e-08	4.22692	0.18	0.014	0.000623303
Ccdc6	1.95239e-08	1.94053	0.361	0.112	0.000633629
Clic5	1.95883e-08	2.22781	0.352	0.112	0.00063572
Nradd	1.96009e-08	2.8061	0.27	0.06	0.000636126
Shisa9	2.0281e-08	-3.05871	0.033	0.288	0.0006582
Npm1	2.03002e-08	0.499706	0.984	0.972	0.000658822
Crip2	2.03046e-08	-0.344895	1	1	0.000658966
Hist1h2al	2.08709e-08	5.34809	0.139	0	0.000677345
Loxl1	2.08709e-08	5.29087	0.139	0	0.000677345
Lace1	2.08709e-08	4.98102	0.139	0	0.000677345
Taf4a	2.08709e-08	4.97948	0.139	0	0.000677345
Cirh1a	2.08709e-08	4.91792	0.139	0	0.000677345
Fam63a	2.08709e-08	4.89188	0.139	0	0.000677345
Pcnxl3	2.08709e-08	4.83663	0.139	0	0.000677345
Washc2	2.09072e-08	-4.69085	0	0.223	0.000678522
Pvalb	2.09073e-08	-5.76949	0	0.223	0.000678527
1810058I24Rik	2.09938e-08	-0.48008	0.951	0.991	0.000681334
Mlf2	6.76474e-10	0.784202	0.934	0.809	2.19543e-05
Vldlr	2.25831e-08	1.73756	0.549	0.326	0.000732911
Pfdn4	2.3213e-08	1.51447	0.525	0.256	0.000753354
Wrb	2.52068e-08	1.93168	0.385	0.135	0.000818062
Fitm1	5.31759e-12	-0.837968	0.77	0.963	1.72577e-07
Map1lc3a	1.7976e-21	-0.833265	0.975	1	5.83394e-17
2010107E04Rik	2.60145e-08	0.324574	1	1	0.000844274
Slc36a2	2.67895e-08	-3.29058	0.016	0.256	0.000869428
Slc25a25	2.71143e-08	-2.60093	0.057	0.321	0.000879967
Atxn7l3b	2.43332e-10	-0.832308	0.762	0.902	7.89711e-06
Aldh1l2	2.93056e-08	-1.95097	0.09	0.372	0.000951084
Washc1	3.07679e-08	-4.37019	0	0.219	0.000998541
Reep5	3.17778e-09	0.784113	0.934	0.8	0.000103132
Rora	3.28225e-08	-1.85138	0.115	0.405	0.00106522
Aes	6.70561e-21	-0.826299	0.951	1	2.17624e-16
Sh3gl3	3.40714e-08	-1.50375	0.131	0.442	0.00110575
Gmpr	1.13163e-10	-0.819713	0.746	0.916	3.6726e-06
Clic4	7.26671e-09	0.77171	0.918	0.805	0.000235834
1810022K09Rik	1.05445e-06	-0.81627	0.525	0.763	0.0342212
Mbnl2	1.01548e-10	-0.815698	0.779	0.916	3.29565e-06
Slit3	3.68476e-08	-2.50132	0.066	0.33	0.00119585
Usp50	3.75371e-08	1.96223	0.41	0.163	0.00121823
Zfp644	1.81139e-07	-0.809687	0.492	0.763	0.0058787
Mycbp2	9.35733e-07	-0.808363	0.402	0.67	0.0303683
Plcb2	4.03119e-08	-3.82184	0.008	0.233	0.00130828
Hectd1	1.52333e-07	-0.806607	0.525	0.753	0.00494382
Ncoa4	4.2289e-08	-3.61639	0.016	0.247	0.00137245
Hhatl	4.24327e-08	-1.35956	0.148	0.456	0.00137711
Clasp1	4.53179e-07	0.768727	0.828	0.712	0.0147075
4833412C05Rik	4.27712e-08	4.35738	0.148	0.005	0.0013881
Gm11627	4.28963e-08	2.19683	0.377	0.135	0.00139216
Vat1	4.34479e-08	3.09894	0.197	0.023	0.00141006
Mgst3	9.30346e-20	-0.805575	0.934	0.995	3.01934e-15
Adrb1	4.47954e-08	-2.09133	0.049	0.312	0.00145379
Bcl11a	4.67027e-08	2.30464	0.27	0.06	0.00151569
Cab39l	4.67486e-08	-2.79936	0.057	0.312	0.00151718
Atp5b	1.33432e-26	0.76541	1	1	4.33041e-22
Sox4	3.96673e-09	-0.802057	0.795	0.921	0.000128736
Slitrk4	5.33183e-08	2.19253	0.377	0.14	0.00173039
Chrac1	1.89339e-08	-0.799905	0.689	0.86	0.00061448
Des	6.19506e-11	0.764011	0.975	1	2.01054e-06
Clcn5	5.49327e-08	3.11814	0.262	0.06	0.00178279
Rrm2b	5.49745e-08	-1.70893	0.131	0.428	0.00178414
Sec61g	1.24847e-16	0.761707	0.992	0.953	4.05177e-12
Lypla1	5.55532e-08	1.37965	0.541	0.284	0.00180292
Aif1l	5.66716e-08	4.93704	0.131	0	0.00183922
Crnde	5.66716e-08	4.88108	0.131	0	0.00183922
Ric8	5.66716e-08	4.87326	0.131	0	0.00183922
Prosc	5.66716e-08	4.87266	0.131	0	0.00183922
Peo1	5.66716e-08	4.8296	0.131	0	0.00183922
2610305D13Rik	5.66716e-08	4.79551	0.131	0	0.00183922
Cpsf3l	5.66716e-08	4.75151	0.131	0	0.00183922
RP23-291B1.2	5.66716e-08	4.74478	0.131	0	0.00183922
Rps27l	1.68324e-14	0.758169	0.975	0.972	5.4628e-10
Psmb3	9.58543e-11	0.74999	0.943	0.879	3.11086e-06
Lrpap1	9.29604e-08	-0.797465	0.574	0.814	0.00301694
Zfp579	5.94614e-08	-2.20095	0.082	0.358	0.00192976
1110065P20Rik	1.94308e-07	-0.79401	0.557	0.8	0.00630608
Nfu1	1.88648e-08	-0.793559	0.623	0.833	0.000612238
Cdk12	6.29969e-08	-1.51075	0.205	0.498	0.0020445
AY036118	6.36159e-08	-3.82486	0.041	0.274	0.00206459
Sh3glb1	1.45379e-13	-0.791559	0.869	0.963	4.71813e-09
Pdxp	6.62329e-08	-4.48873	0	0.209	0.00214952
Kxd1	6.69603e-09	-0.790537	0.598	0.856	0.000217313
Nme7	7.10872e-08	-2.32136	0.066	0.326	0.00230706
Zfp106	1.36927e-07	-0.782638	0.631	0.819	0.00444383
Limd2	7.51033e-08	2.60985	0.238	0.047	0.0024374
Pdrg1	7.62253e-08	-0.780519	0.549	0.791	0.00247382
Rps15a	7.68481e-08	0.303745	1	1	0.00249403
Sesn1	7.7858e-08	-1.83909	0.115	0.391	0.0025268
Lef1	8.29896e-08	3.7381	0.189	0.023	0.00269334
Smdt1	1.98776e-21	-0.779886	0.967	0.995	6.45109e-17
Ap2s1	2.65833e-07	0.746409	0.877	0.744	0.00862734
Uqcrh	8.74171e-08	-0.241893	1	1	0.00283704
Timp3	7.207e-08	-0.773051	0.664	0.902	0.00233896
mt-Co1	8.91192e-08	-0.334677	1	1	0.00289227
Plod2	8.9376e-08	2.54335	0.238	0.047	0.00290061
Sub1	8.95524e-08	0.532509	0.967	0.944	0.00290633
Clic1	5.53515e-10	0.742027	0.967	0.912	1.79638e-05
Hnrnpab	1.80949e-08	0.739143	0.902	0.795	0.000587253
Dlg2	9.16175e-08	4.01907	0.156	0.009	0.00297336
Mtch1	7.61378e-14	-0.76912	0.91	0.995	2.47097e-09
Prrc2c	6.1086e-08	-0.768552	0.607	0.847	0.00198249
Diablo	9.62231e-08	1.44263	0.549	0.316	0.00312282
C030006K11Rik	9.68879e-08	-4.61506	0	0.205	0.0031444
Mindy3	9.68879e-08	-4.5712	0	0.205	0.0031444
Atn1	9.68879e-08	-4.444	0	0.205	0.0031444
Hint2	4.03792e-08	-0.767632	0.664	0.893	0.00131047
Nfic	3.035e-07	-0.762415	0.418	0.693	0.0098498
Metap2	1.03314e-07	0.580757	0.91	0.842	0.00335295
Rbfox1	1.08559e-07	-2.38921	0.041	0.288	0.00352316
Vps13a	1.10152e-07	-3.05715	0.025	0.251	0.00357489
Ccdc34	1.11404e-07	1.63593	0.516	0.279	0.0036155
Wtap	1.11974e-07	1.36392	0.549	0.316	0.00363402
Trdn	3.0356e-16	-0.759069	0.926	0.995	9.85175e-12
Zfp36	1.19179e-07	-1.57432	0.238	0.498	0.00386784
S100a6	1.20823e-07	-2.16026	0.197	0.479	0.00392119
Ndufb11	1.66254e-23	-0.747985	0.984	0.995	5.3956e-19
Ndufa4	1.50061e-32	-0.747409	1	1	4.87009e-28
Pbx1	1.22736e-06	0.736147	0.893	0.781	0.0398328
Cox5a	2.00599e-31	-0.741664	1	1	6.51024e-27
Myl9	1.00935e-09	0.735349	0.975	0.986	3.27574e-05
Tmem126a	2.66303e-07	-0.741093	0.639	0.837	0.00864259
Abcc5	1.30877e-07	2.01353	0.303	0.084	0.00424748
Sfr1	1.20244e-09	-0.740167	0.893	0.949	3.90238e-05
Eif3c	9.60689e-09	-0.737049	0.689	0.893	0.000311782
Psmb7	1.37693e-07	0.731865	0.877	0.828	0.00446867
Etaa1os	1.39874e-07	2.47374	0.238	0.047	0.00453946
Ldhb	1.30667e-23	-0.732663	1	1	4.24068e-19
Tmem35a	1.41454e-07	-4.40759	0	0.2	0.00459076
Cenpt	1.42217e-07	3.73852	0.139	0.005	0.00461551
Pgam1	5.34678e-13	0.729042	0.992	0.953	1.73525e-08
Eif4a1	1.34115e-11	0.712758	0.943	0.921	4.35258e-07
Idh2	5.43539e-23	-0.732526	0.992	1	1.764e-18
Gng2	1.52413e-07	3.32758	0.164	0.014	0.00494641
Iigp1	1.53167e-07	2.94325	0.23	0.047	0.00497089
Raver1	1.53268e-07	4.79899	0.123	0	0.00497417
Csrp2bp	1.53268e-07	4.6534	0.123	0	0.00497417
E430025E21Rik	1.53268e-07	4.64643	0.123	0	0.00497417
2500002B13Rik	1.53268e-07	4.58394	0.123	0	0.00497417
Npm3	1.548e-07	1.49588	0.484	0.233	0.00502387
Vegfb	3.80615e-07	-0.719377	0.656	0.87	0.0123525
Ccnt2	1.65171e-07	1.36191	0.516	0.274	0.00536045
Dcbld2	1.71275e-07	2.26206	0.246	0.051	0.00555855
Acadm	2.43179e-11	-0.716875	0.836	0.953	7.89214e-07
mt-Cytb	9.04364e-27	-0.710208	1	1	2.93502e-22
Mdp1	3.67671e-08	-0.709729	0.787	0.944	0.00119324
Slc25a4	1.52415e-37	-0.705049	1	1	4.94648e-33
Baiap2l1	1.87047e-07	-2.02538	0.082	0.335	0.00607042
Tecr	1.89792e-11	-0.703273	0.861	0.963	6.1595e-07
Rspo3	1.88629e-07	2.31749	0.262	0.06	0.00612176
Sf3a2	1.91817e-07	2.03348	0.287	0.079	0.00622523
Pigp	5.37454e-08	-0.701066	0.68	0.893	0.00174425
Gm10036	2.02159e-07	2.4149	0.254	0.06	0.00656088
Mgmt	2.05357e-07	-2.08606	0.123	0.372	0.00666466
Slf2	2.06122e-07	-4.62493	0	0.195	0.00668949
Gucy1b1	2.06122e-07	-4.59297	0	0.195	0.00668949
Nppb	2.06525e-07	3.53622	0.254	0.06	0.00670255
Armcx5	2.10107e-07	-2.16372	0.09	0.344	0.00681881
Eif2s3y	2.1092e-07	1.26682	0.516	0.256	0.00684521
Rps5	5.29466e-27	0.707301	1	1	1.71833e-22
Aldh1b1	2.1806e-07	2.11169	0.336	0.121	0.00707691
Actn2	1.71846e-13	0.700575	0.967	1	5.5771e-09
Rpl32	2.35342e-25	0.699714	1	1	7.63778e-21
Laptm4a	3.57281e-13	0.688284	0.975	0.967	1.15952e-08
Ptgs1	2.27825e-07	-2.16131	0.09	0.34	0.00739383
Fxyd1	2.19835e-21	0.68624	1	1	7.13454e-17
Psmb1	2.42042e-07	0.507947	0.967	0.926	0.00785524
Col6a1	2.49592e-07	3.69905	0.148	0.009	0.00810026
Rgs16	2.50037e-07	-2.74384	0.041	0.27	0.0081147
Mhrt	2.53198e-07	-1.36389	0.172	0.474	0.00821729
Naca	2.55109e-07	0.451111	1	0.991	0.00827931
Tma7	2.55856e-07	0.423477	0.992	0.967	0.00830354
Cat	2.5636e-07	1.52716	0.443	0.205	0.00831991
Ubl4a	2.57624e-07	1.26775	0.557	0.321	0.00836092
Mrpl18	2.1477e-10	-0.700385	0.836	0.953	6.97014e-06
Pabpn1	2.63392e-07	1.56707	0.467	0.237	0.00854813
Nol7	2.52745e-08	-0.696604	0.762	0.902	0.000820257
Gdi2	5.03195e-08	0.684737	0.902	0.823	0.00163307
Itm2c	3.17761e-07	-0.694727	0.607	0.851	0.0103126
Rps10	1.23327e-29	-0.690936	1	1	4.00245e-25
Ranbp2	2.70874e-07	-1.51392	0.189	0.456	0.00879093
Pdk3	2.78238e-07	1.39447	0.533	0.293	0.00902993
Nudt18	2.80686e-07	2.16379	0.336	0.112	0.0091094
Cmtm3	2.83308e-07	3.07402	0.18	0.023	0.00919446
Hdac1	2.87695e-07	2.34871	0.27	0.074	0.00933684
Uqcr11	2.96896e-07	-0.303271	1	1	0.00963547
Ints13	2.99781e-07	-4.32786	0	0.191	0.00972909
Cirbp	7.0832e-09	-0.686862	0.844	0.935	0.000229878
Gm26917	3.05342e-07	-2.35292	0.09	0.335	0.00990957
Col4a3	3.12034e-07	-2.82665	0.041	0.265	0.0101267
Akt1	8.81782e-08	-0.684742	0.697	0.888	0.00286174
Mrfap1	6.54534e-11	0.684214	0.984	0.926	2.12423e-06
Chchd3	3.1676e-10	-0.679877	0.795	0.967	1.02801e-05
Nsg2	3.20754e-07	-4.18355	0.008	0.205	0.0104098
St3gal4	3.2107e-07	1.76362	0.484	0.237	0.01042
Rps9	3.21675e-07	0.282201	1	1	0.0104396
Il15	3.3093e-07	-4.03338	0.008	0.205	0.01074
Ndufs7	1.26328e-17	-0.678407	0.984	1	4.09986e-13
Sept11	3.42478e-07	2.19535	0.246	0.056	0.0111148
Sema3a	3.49977e-07	-3.65477	0.016	0.219	0.0113581
Mrpl27	1.11636e-06	-0.67313	0.598	0.805	0.0362304
Cers4	3.50225e-07	-0.670481	0.738	0.879	0.0113662
Lrrc58	3.54228e-07	1.23651	0.549	0.307	0.0114961
Rab2a	3.57105e-07	-0.44476	0.885	0.944	0.0115895
Mmp14	3.60449e-07	2.007	0.328	0.112	0.011698
Unc5b	3.66247e-07	1.51254	0.549	0.358	0.0118862
Ppia	6.51977e-27	0.674914	1	1	2.11593e-22
Npr1	3.68298e-07	3.95845	0.131	0.005	0.0119527
Apobec2	2.12714e-12	-0.668875	0.943	0.995	6.90342e-08
Ndufv1	1.57304e-11	-0.668111	0.926	0.981	5.10516e-07
Rps26	3.77367e-07	0.340152	1	0.995	0.0122471
Rbp1	3.8039e-07	4.1676	0.131	0.005	0.0123452
Tmem14c	1.23975e-07	-0.667578	0.77	0.879	0.0040235
Trabd2b	4.00054e-07	-1.61031	0.164	0.428	0.0129834
Rnf128	4.04479e-07	1.48756	0.443	0.195	0.013127
Rpl27-ps3	4.12551e-07	1.75487	0.402	0.181	0.0133889
Psd	4.12966e-07	5.09211	0.115	0	0.0134024
Gm15800	4.12966e-07	4.83267	0.115	0	0.0134024
D2Wsu81e	4.12966e-07	4.79361	0.115	0	0.0134024
Adrbk1	4.12966e-07	4.6953	0.115	0	0.0134024
Mir143hg	4.12966e-07	4.36981	0.115	0	0.0134024
Gm10110	4.12966e-07	4.29952	0.115	0	0.0134024
Sc5d	4.16968e-07	-2.10246	0.074	0.316	0.0135323
Fam98b	4.32149e-07	-1.54358	0.148	0.423	0.014025
mt-Co2	4.85929e-20	-0.66194	1	1	1.57703e-15
Hectd4	4.35176e-07	-4.41066	0	0.186	0.0141232
Tmem250-ps	4.35176e-07	-4.40702	0	0.186	0.0141232
Srp54a	4.35176e-07	-4.3173	0	0.186	0.0141232
Phldb2	4.35357e-07	1.50298	0.533	0.307	0.0141291
Rps20	6.30193e-25	-0.661338	1	1	2.04523e-20
Nme4	4.45635e-07	2.67297	0.213	0.042	0.0144626
Tpi1	4.47727e-07	0.503417	0.992	1	0.0145305
Tbca	3.23482e-13	0.672876	0.975	0.963	1.04983e-08
Ube2a	4.57325e-07	-0.656844	0.762	0.921	0.014842
Ipo9	4.66157e-07	1.76079	0.361	0.135	0.0151287
Atp5g3	4.70051e-07	-0.278372	0.992	1	0.015255
Cdc14b	4.7406e-07	2.78654	0.205	0.037	0.0153851
Timm13	3.01613e-10	-0.650398	0.869	0.995	9.78854e-06
Mcm6	5.05517e-07	2.47289	0.238	0.056	0.016406
Lpin2	5.13518e-07	-2.32491	0.057	0.284	0.0166657
Anapc13	5.20382e-07	0.511442	0.984	0.935	0.0168885
Tmem256	3.62362e-09	0.670488	0.934	0.851	0.000117601
Gm11899	5.30647e-07	-1.91162	0.057	0.298	0.0172216
Lgr4	5.32685e-07	1.75128	0.426	0.195	0.0172878
Lrrc24	5.39021e-07	3.98356	0.139	0.009	0.0174934
Kif21a	5.39072e-07	-1.27294	0.18	0.46	0.017495
Scp2	8.86013e-07	-0.648188	0.721	0.86	0.0287547
Emc6	1.32766e-07	-0.647488	0.746	0.874	0.00430879
Hddc2	5.66346e-07	1.76467	0.377	0.153	0.0183802
Cisd1	6.69939e-10	-0.647129	0.869	0.986	2.17422e-05
Oaz1	3.42241e-27	-0.645937	1	1	1.11071e-22
Mrpl20	4.93358e-07	-0.643987	0.713	0.893	0.0160114
Dnaja1	1.63619e-07	-0.635462	0.811	0.944	0.00531008
Chmp1b	6.30548e-07	-4.46806	0	0.181	0.0204638
C1qtnf12	6.30548e-07	-4.38609	0	0.181	0.0204638
Lnpk	6.30548e-07	-4.25305	0	0.181	0.0204638
Hnrnpf	3.16843e-07	0.658639	0.918	0.856	0.0102828
Polr3g	6.46643e-07	2.55433	0.205	0.037	0.0209862
Tpr	5.92107e-07	-0.6354	0.754	0.879	0.0192163
Myl3	4.31785e-29	-0.63481	0.992	1	1.40132e-24
2210016F16Rik	6.8008e-07	1.39634	0.525	0.298	0.0220713
Adamtsl5	6.80544e-07	2.36015	0.262	0.074	0.0220864
Dstn	1.73383e-11	0.652902	1	1	5.62698e-07
mt-Atp6	6.87521e-07	0.272393	1	1	0.0223128
Gabrg3	7.11764e-07	-2.06923	0.057	0.284	0.0230996
Dgat2	7.17867e-07	-2.25731	0.057	0.284	0.0232977
Itga7	7.29149e-07	-2.97006	0.016	0.214	0.0236638
Map1lc3b	4.28233e-13	-0.63198	0.951	1	1.38979e-08
Psmb5	1.56675e-11	-0.626543	0.918	0.986	5.08474e-07
Atp6v0e	1.16494e-06	0.643722	0.91	0.833	0.0378069
Cdk2ap1	7.69257e-07	2.31879	0.295	0.098	0.0249655
Pld3	7.76152e-07	1.83076	0.369	0.153	0.0251893
Tspo	7.78206e-07	-0.625664	0.738	0.884	0.0252559
Cdkn2aip	7.81366e-07	-2.0776	0.066	0.298	0.0253585
Rgcc	8.00665e-07	-4.41454	0.008	0.195	0.0259848
Irx1	8.01954e-07	-2.16197	0.057	0.284	0.0260266
Rps23	1.93184e-22	0.639977	1	1	6.2696e-18
Pgam2	8.42275e-07	0.545799	0.975	0.991	0.0273352
Rpl26	3.52971e-18	-0.622886	1	1	1.14553e-13
Smim1	8.62934e-07	-1.30989	0.123	0.391	0.0280056
Anp32a	2.27308e-07	0.635678	0.91	0.758	0.00737706
Rps25	8.3907e-18	0.62501	1	0.995	2.72312e-13
Gm10093	8.81647e-07	3.39143	0.148	0.014	0.028613
Idh3b	2.68638e-07	-0.622043	0.803	0.935	0.00871838
Acadl	5.83567e-16	-0.621054	0.975	0.991	1.89391e-11
Ednra	8.91036e-07	2.99411	0.189	0.033	0.0289177
Kctd2	8.92546e-07	-1.83758	0.107	0.349	0.0289667
Ndufb5	5.89957e-20	-0.619937	0.984	1	1.91465e-15
Gatd1	9.1196e-07	-4.40926	0	0.177	0.0295967
Dcaf1	9.1196e-07	-4.30589	0	0.177	0.0295967
Selenon	9.1196e-07	-4.2513	0	0.177	0.0295967
Mfsd14a	9.1196e-07	-4.17985	0	0.177	0.0295967
Gdnf	9.23502e-07	-2.73969	0.025	0.228	0.0299713
Ubc	5.8583e-09	-0.617985	0.934	0.972	0.000190125
Pcgf2	9.65198e-07	1.7968	0.328	0.116	0.0313246
Vdac2	2.5877e-17	-0.616098	0.992	0.995	8.39813e-13
Igfbp5	1.03494e-06	-0.336105	0.787	0.94	0.033588
Arhgap20	1.03855e-06	-2.33637	0.041	0.256	0.033705
Ccser2	6.58226e-07	-0.614099	0.795	0.912	0.0213621
Canx	1.06757e-06	0.619471	0.885	0.856	0.0346469
Rnf114	1.07021e-06	1.574	0.402	0.167	0.0347327
Cct4	8.36306e-07	0.617264	0.885	0.777	0.0271415
Adamtsl1	1.07662e-06	1.98889	0.295	0.098	0.0349406
Ywhaq	1.07902e-06	0.512645	0.959	0.953	0.0350185
Prdx1	4.12452e-11	0.608177	0.975	0.967	1.33857e-06
Gm43672	1.09979e-06	-1.73722	0.082	0.326	0.0356926
Speer4e	1.10888e-06	5.03956	0.107	0	0.0359877
Adck4	1.10888e-06	4.94251	0.107	0	0.0359877
Igfbp2	1.10888e-06	4.90988	0.107	0	0.0359877
Rnmtl1	1.10888e-06	4.59898	0.107	0	0.0359877
AI846148	1.10888e-06	4.57133	0.107	0	0.0359877
6330408A02Rik	1.10888e-06	4.40081	0.107	0	0.0359877
DHRSX	1.10888e-06	4.35051	0.107	0	0.0359877
Cox8a	3.62255e-30	-0.59413	1	1	1.17566e-25
Faap20	1.14076e-06	1.29223	0.516	0.274	0.0370222
Leprot	1.14178e-06	1.24845	0.549	0.321	0.0370553
Ints6	1.15655e-06	-2.68605	0.049	0.26	0.0375346
Acot13	5.70808e-08	0.607347	0.943	0.856	0.0018525
Immt	5.07264e-09	-0.593252	0.803	0.94	0.000164627
Lamb3	1.17884e-06	-2.4903	0.049	0.265	0.0382581
Mylip	1.18907e-06	-2.44211	0.049	0.265	0.03859
Prdx5	5.60151e-10	-0.58741	0.918	0.977	1.81791e-05
Ndufs6	1.02804e-15	0.601524	0.992	0.995	3.33639e-11
St5	1.21065e-06	2.05604	0.262	0.074	0.0392903
Trim28	1.21616e-06	1.35257	0.574	0.367	0.0394693
Ndufb2	1.71091e-13	0.601133	0.992	0.981	5.5526e-09
Hspa4l	1.23596e-06	1.45323	0.475	0.237	0.0401117
Sgcd	1.25121e-06	-2.01755	0.049	0.27	0.0406068
Zfp322a	1.25802e-06	1.32465	0.516	0.284	0.0408278
Vcam1	1.28677e-06	-1.52657	0.131	0.386	0.0417607
Pter	1.3132e-06	1.74605	0.238	0.056	0.0426186
Virma	1.31657e-06	-4.26586	0	0.172	0.0427278
Rpl36	1.3983e-06	0.253427	1	1	0.0453805
Palmd	1.40137e-06	2.58097	0.287	0.098	0.04548
Hsp90ab1	1.40649e-06	-0.28647	1	1	0.0456461
Eef1a1	1.57157e-22	0.591801	1	1	5.10039e-18
Itgb1bp2	1.46991e-06	1.28718	0.574	0.377	0.0477044
Igf1r	1.47417e-06	1.08067	0.566	0.34	0.0478426
Psme3	1.4854e-06	1.63274	0.385	0.167	0.0482072
Atp6v0b	1.52952e-06	-0.47517	0.852	0.94	0.049639
Ndufb9	1.99408e-23	-0.586653	1	1	6.47159e-19
Nkx2-5	1.54375e-06	0.692484	0.91	0.884	0.0501007
Crk	1.57149e-06	1.16541	0.598	0.391	0.051001
B230118H07Rik	1.57321e-06	-0.90683	0.41	0.665	0.0510569
Arl1	1.57939e-06	-0.74855	0.59	0.8	0.0512577
Adamts19	1.58067e-06	-1.3859	0.205	0.451	0.0512992
Atad2b	1.6148e-06	-1.74358	0.107	0.349	0.0524069
Fdx1	1.6479e-06	-0.71567	0.656	0.814	0.0534809
Rala	1.66809e-06	-0.678223	0.648	0.847	0.054136
Atf6	1.70303e-06	-1.19966	0.205	0.474	0.0552701
Nxf1	1.7128e-06	-0.563003	0.852	0.926	0.0555873
Inhba	1.71291e-06	3.97415	0.131	0.009	0.0555909
Furin	1.72495e-06	1.31654	0.574	0.367	0.0559815
Tcp1	1.75788e-06	0.624745	0.877	0.833	0.0570504
Ddx24	1.7637e-06	-0.819159	0.525	0.753	0.0572393
Eif3g	1.78347e-06	0.954435	0.721	0.577	0.0578807
Ankrd28	1.80248e-06	-2.4869	0.025	0.219	0.0584976
Cpsf6	1.85409e-06	1.23378	0.557	0.344	0.0601728
Togaram1	1.89735e-06	-4.22051	0	0.167	0.0615766
Rida	1.89735e-06	-4.20319	0	0.167	0.0615766
Retreg3	1.89735e-06	-4.16586	0	0.167	0.0615766
Rnf44	1.89875e-06	2.01175	0.262	0.074	0.0616222
Tox3	1.93523e-06	0.900719	0.672	0.423	0.0628059
Chrm2	1.97522e-06	-1.09693	0.311	0.591	0.0641039
Aars	2.00292e-06	1.86427	0.361	0.158	0.0650028
Nap1l5	2.03716e-06	-3.42195	0.016	0.2	0.066114
Smad5	2.04295e-06	1.90108	0.344	0.144	0.066302
Pcgf3	2.0685e-06	1.51225	0.385	0.163	0.0671312
Tom1l1	2.07968e-06	1.64976	0.443	0.242	0.0674941
Cdadc1	2.08412e-06	-1.94234	0.074	0.298	0.0676379
Gca	2.1292e-06	2.90143	0.164	0.023	0.0691012
Ptk7	2.13467e-06	2.1721	0.205	0.042	0.0692786
Igfbp4	2.14005e-06	2.27399	0.32	0.126	0.0694532
Rgma	2.14749e-06	-3.29571	0.025	0.209	0.0696946
Gpx7	2.15275e-06	1.643	0.451	0.247	0.0698652
Creb3l2	2.24283e-06	1.17365	0.566	0.335	0.072789
Rab7	2.30836e-06	0.780452	0.828	0.721	0.0749154
Hagh	2.31544e-06	-0.838203	0.41	0.684	0.0751453
Lgi3	2.34701e-06	-1.22955	0.189	0.465	0.0761697
Bloc1s1	2.36885e-06	-1.18308	0.262	0.53	0.0768786
Uqcc2	2.39775e-06	-0.486424	0.918	0.981	0.0778167
Camk1	2.40756e-06	-0.736729	0.697	0.851	0.078135
Sssca1	2.42803e-06	-0.884278	0.459	0.656	0.0787992
Sirt1	2.47751e-06	-1.65851	0.09	0.326	0.0804051
Sugp2	2.4785e-06	-2.07435	0.082	0.302	0.0804373
Med21	2.52542e-06	0.834247	0.779	0.684	0.0819598
Atp6ap1l	2.53943e-06	-3.01536	0.033	0.228	0.0824146
Vasp	2.54391e-06	1.17446	0.557	0.33	0.08256
Epdr1	2.5555e-06	2.79657	0.18	0.033	0.0829362
Slc1a5	2.5941e-06	3.44773	0.139	0.014	0.0841888
Psma6	2.60684e-06	0.600507	0.902	0.772	0.0846022
Acot1	2.62976e-06	-1.59834	0.098	0.33	0.0853463
Pak3	2.6439e-06	3.85037	0.115	0.005	0.0858053
Snrpb2	2.67234e-06	1.10984	0.623	0.451	0.0867282
Sde2	2.72375e-06	-1.10899	0.246	0.516	0.0883967
Dnajc5b	2.72952e-06	-4.30666	0	0.163	0.0885839
Ewsr1	2.76246e-06	1.0595	0.631	0.451	0.089653
Slc30a4	2.78455e-06	1.85603	0.303	0.112	0.0903697
Lgalsl	2.78718e-06	-1.21648	0.246	0.493	0.0904552
Mb	2.80394e-06	-1.15654	0.697	0.837	0.0909992
Ctsa	2.81011e-06	1.00015	0.656	0.456	0.0911993
Nfkbiz	2.82837e-06	-2.36886	0.033	0.228	0.0917919
Ldlr	2.88225e-06	-1.67257	0.066	0.284	0.0935406
Sec13	2.89798e-06	1.05142	0.623	0.395	0.094051
Trappc10	2.9075e-06	-1.44651	0.156	0.391	0.0943599
H3f3a	2.93714e-06	0.290593	0.992	1	0.0953221
Zpr1	2.95923e-06	-1.70878	0.115	0.349	0.096039
Gnb3	2.96843e-06	5.32916	0.098	0	0.0963375
Tssc1	2.96843e-06	4.58655	0.098	0	0.0963375
Dfna5	2.96843e-06	4.55423	0.098	0	0.0963375
Schip1.1	2.96843e-06	4.53049	0.098	0	0.0963375
2210404O09Rik	2.96843e-06	4.49843	0.098	0	0.0963375
Thtpa	2.96843e-06	4.46567	0.098	0	0.0963375
Gm10094	2.96843e-06	4.45589	0.098	0	0.0963375
Bmp4	2.96843e-06	4.29206	0.098	0	0.0963375
Pcdhga8.1	2.96843e-06	4.10219	0.098	0	0.0963375
Ppp1r1a	2.96877e-06	-0.637538	0.705	0.86	0.0963483
Sh3bp1	2.99523e-06	2.01275	0.262	0.079	0.0972072
Wee1	3.0091e-06	-2.52078	0.025	0.214	0.0976572
Peli1	3.19502e-06	-1.17594	0.262	0.502	0.103691
Glg1	3.20886e-06	-0.963375	0.352	0.614	0.10414
Gm6563	3.225e-06	2.02345	0.295	0.107	0.104664
Zc3hav1l	3.23771e-06	3.00475	0.139	0.014	0.105077
Lama4	3.24927e-06	1.07838	0.598	0.405	0.105452
Epc2	3.25405e-06	-1.55098	0.172	0.414	0.105607
Kdm1a	3.29754e-06	-0.857779	0.402	0.623	0.107019
Vash2	3.30176e-06	1.77149	0.328	0.13	0.107155
Map3k8	3.31283e-06	-2.12572	0.049	0.251	0.107515
Tnfaip8	3.35532e-06	-1.93811	0.066	0.279	0.108894
Cdv3	3.43141e-06	-0.671402	0.59	0.828	0.111363
Ap2b1	3.43704e-06	1.83476	0.336	0.14	0.111546
Slc38a1	3.67627e-06	0.981697	0.689	0.488	0.11931
Sema4d	3.69229e-06	-2.71803	0.025	0.209	0.11983
Il13ra1	3.69989e-06	2.41123	0.205	0.047	0.120076
Pea15a	3.74862e-06	0.930712	0.721	0.577	0.121658
Cebpzos	3.76426e-06	-0.903575	0.426	0.647	0.122165
Ndufc2	3.80685e-06	-0.336472	0.967	0.995	0.123548
Trim11	3.87637e-06	-1.869	0.066	0.279	0.125804
Mtdh	3.87997e-06	-0.623412	0.746	0.884	0.125921
Qsox1	3.88683e-06	1.94966	0.32	0.13	0.126143
Gpr37	3.89638e-06	4.383	0.123	0.009	0.126453
Pmvk	3.90276e-06	-0.941968	0.5	0.702	0.12666
Prune1	3.91993e-06	-4.0844	0	0.158	0.127218
Kyat1	3.91993e-06	-4.05123	0	0.158	0.127218
Cryzl2	3.91993e-06	-3.97106	0	0.158	0.127218
Mat2a	3.94632e-06	0.969885	0.664	0.488	0.128074
Csnk1a1	4.15155e-06	-0.431486	0.951	0.991	0.134734
Tmem259	4.15433e-06	-1.27623	0.205	0.433	0.134825
Yipf7	4.27139e-06	-1.95034	0.049	0.256	0.138624
St3gal5	4.29023e-06	2.2125	0.205	0.047	0.139235
Borcs6	4.35165e-06	-1.35543	0.148	0.386	0.141228
Tax1bp1	4.36372e-06	-0.678201	0.639	0.819	0.14162
Ube2e2	4.46024e-06	-1.08715	0.254	0.526	0.144753
Slc16a7	4.5402e-06	-3.08461	0.016	0.191	0.147348
Zcchc24	4.55366e-06	1.66756	0.361	0.167	0.147784
Cmip	4.59137e-06	1.88961	0.23	0.06	0.149008
Ubn1	4.60362e-06	-1.12327	0.279	0.549	0.149406
Pfkp	4.61156e-06	0.776672	0.77	0.712	0.149664
Gga2	4.81006e-06	1.50533	0.402	0.191	0.156106
Fabp4	4.81145e-06	3.54318	0.156	0.023	0.156151
Ccdc12	4.8177e-06	0.818887	0.77	0.6	0.156354
Dpp3	4.82932e-06	1.46743	0.41	0.2	0.156731
Wnt5a	4.93278e-06	2.72381	0.156	0.023	0.160088
Nrep	5.01985e-06	0.763407	0.811	0.721	0.162914
Atp6v1b2	5.086e-06	1.27228	0.508	0.33	0.165061
Frat2	5.26838e-06	-2.23804	0.057	0.26	0.17098
Ifngr2	5.38339e-06	-0.651691	0.607	0.819	0.174713
Esf1	5.3867e-06	-0.917252	0.279	0.54	0.17482
Ccdc58	5.42543e-06	1.09751	0.541	0.326	0.176077
Plekha7	5.43704e-06	-1.33282	0.148	0.386	0.176454
Txndc5	5.49295e-06	1.42379	0.443	0.219	0.178268
Flnc	5.5118e-06	1.01543	0.754	0.628	0.17888
Luzp1	5.52991e-06	-0.812114	0.426	0.665	0.179468
Sec61b	5.60872e-06	0.927677	0.721	0.572	0.182026
Twnk	5.62001e-06	-4.02121	0	0.153	0.182392
BC005561	5.8311e-06	-1.14171	0.279	0.526	0.189243
Wdr82	5.9346e-06	1.4067	0.459	0.265	0.192601
Sri	5.95096e-06	0.868708	0.73	0.619	0.193132
Lactb	5.99663e-06	-1.47352	0.156	0.395	0.194615
Rabgap1l	6.00686e-06	-0.973164	0.393	0.609	0.194947
Mybpc2	6.03919e-06	2.78794	0.164	0.028	0.195996
Rsbn1l	6.03971e-06	-0.876191	0.426	0.688	0.196013
Blvrb	6.04458e-06	-0.958586	0.23	0.507	0.196171
Ddrgk1	6.06993e-06	-0.798439	0.508	0.698	0.196993
Igf2bp1	6.08305e-06	2.69443	0.189	0.042	0.197419
Atg13	6.21539e-06	1.94763	0.295	0.107	0.201714
Cav1	6.25073e-06	4.69782	0.107	0.005	0.202861
Slmap	6.25283e-06	0.761967	0.803	0.726	0.202929
Arl8b	6.28988e-06	1.0996	0.566	0.349	0.204132
Rpl5	6.34305e-06	-0.318496	0.984	0.991	0.205857
Casp8	6.45241e-06	3.84512	0.107	0.005	0.209406
Ddb1	6.51898e-06	0.821888	0.713	0.53	0.211567
Hnrnpdl	6.7351e-06	-0.625061	0.705	0.879	0.218581
Rdh14	6.85207e-06	-0.720921	0.541	0.772	0.222377
Ube2c	6.98419e-06	3.6734	0.107	0.005	0.226665
Socs1	7.08801e-06	-3.6324	0.008	0.167	0.230034
Soat1	7.09546e-06	3.59216	0.107	0.005	0.230276
Zfpm2	7.12315e-06	-1.77769	0.098	0.312	0.231175
Prep	7.18439e-06	1.86773	0.295	0.112	0.233162
Anapc11	7.4793e-06	0.567806	0.91	0.772	0.242733
Smarcd3	7.50893e-06	1.01115	0.697	0.54	0.243695
Phactr3	7.629e-06	-2.38836	0.041	0.228	0.247591
Ddhd2	7.71487e-06	-1.52647	0.066	0.274	0.250378
Pmp22	7.72149e-06	-0.764099	0.492	0.726	0.250593
Trim56	7.74993e-06	2.86895	0.131	0.014	0.251516
Tmem141	7.83367e-06	-1.3951	0.238	0.465	0.254234
Dpf2	7.83791e-06	1.38904	0.418	0.223	0.254372
Nup98	7.91635e-06	-2.10674	0.049	0.242	0.256917
Crabp1	7.92562e-06	5.22797	0.09	0	0.257218
Ly6e	7.92562e-06	4.54684	0.09	0	0.257218
1810011O10Rik	7.92562e-06	4.52549	0.09	0	0.257218
Ldoc1l	7.92562e-06	4.51879	0.09	0	0.257218
Tgif1	7.92562e-06	4.49123	0.09	0	0.257218
Gm15440	7.92562e-06	4.43076	0.09	0	0.257218
Hn1l	7.92562e-06	4.41944	0.09	0	0.257218
Figf	7.92562e-06	4.3266	0.09	0	0.257218
Klhl17	7.92562e-06	4.30992	0.09	0	0.257218
A830080D01Rik	7.92562e-06	4.30595	0.09	0	0.257218
Inadl	7.92562e-06	4.18046	0.09	0	0.257218
Fdft1	8.04382e-06	-1.34239	0.172	0.409	0.261054
Gm42067	8.04407e-06	-3.88605	0	0.149	0.261062
Ube2n	8.07233e-06	0.638861	0.82	0.74	0.26198
Ywhab	8.42539e-06	0.550027	0.918	0.865	0.273438
Cdc42se1	8.58921e-06	1.58133	0.361	0.172	0.278754
Sbno2	8.66111e-06	-3.07241	0.008	0.167	0.281088
Bola2	8.86156e-06	0.748221	0.762	0.6	0.287593
Slc12a6	8.89296e-06	2.11234	0.254	0.084	0.288612
Nudc	9.12218e-06	-0.617601	0.615	0.786	0.296051
Ptdss1	9.12569e-06	1.36711	0.361	0.153	0.296165
Bnip3l	9.44359e-06	0.627629	0.869	0.786	0.306482
Spry4	9.46861e-06	-2.90008	0.016	0.181	0.307294
Atf6b	9.51369e-06	2.59391	0.221	0.065	0.308757
Tmeff1	9.53723e-06	2.26314	0.189	0.042	0.309521
Mrpl43	9.54413e-06	-0.607097	0.598	0.8	0.309745
Obsl1	9.54989e-06	1.08022	0.557	0.367	0.309932
Rpn2	9.64096e-06	1.18203	0.582	0.395	0.312888
Ggct	9.67317e-06	-2.09652	0.025	0.2	0.313933
Fam189a2	9.84499e-06	-0.867285	0.385	0.637	0.319509
Bnip2	1.00405e-05	-0.703572	0.566	0.772	0.325855
Gm17056	1.01148e-05	-3.58348	0.008	0.163	0.328267
Rab3a	1.01981e-05	-0.83721	0.393	0.647	0.33097
Ttc14	1.04088e-05	1.0061	0.566	0.363	0.337808
Tmbim6	1.04191e-05	0.777778	0.746	0.619	0.338141
Foxn3	1.05154e-05	-0.792753	0.352	0.623	0.341267
Prkca	1.05465e-05	1.51239	0.402	0.214	0.342275
Prpf4b	1.05551e-05	-1.01434	0.336	0.577	0.342554
Glrx5	1.05682e-05	-0.522443	0.77	0.888	0.342981
Sgcg	1.07164e-05	-0.565444	0.713	0.916	0.34779
Gm6133	1.07621e-05	2.77686	0.139	0.019	0.349272
Mmgt1	1.1112e-05	2.07872	0.23	0.07	0.360629
Aqp1	1.11592e-05	3.6335	0.115	0.009	0.362161
Erc1	1.13567e-05	-1.29736	0.189	0.419	0.368571
Nudt2	1.14663e-05	-1.05908	0.262	0.516	0.372128
Rpl13a-ps1	1.1488e-05	3.4052	0.115	0.009	0.372832
Cyp4b1	1.1495e-05	-4.08821	0	0.144	0.37306
Large1	1.1495e-05	-3.9051	0	0.144	0.37306
Tmem185b	1.16337e-05	1.97039	0.213	0.056	0.37756
Ergic1	1.17749e-05	1.24761	0.41	0.214	0.382142
Kcnip2	1.18261e-05	3.82391	0.115	0.009	0.383804
Cdh13	1.18722e-05	-0.537205	0.639	0.828	0.385299
Vamp5	1.18965e-05	1.32146	0.434	0.219	0.386088
Mrps6	1.18979e-05	-0.992035	0.443	0.647	0.386136
Ppic	1.19284e-05	0.882835	0.713	0.549	0.387125
Uhrf2	1.20696e-05	1.47943	0.41	0.219	0.391706
Praf2	1.21901e-05	1.84484	0.254	0.084	0.395619
Arhgap1	1.2232e-05	1.44124	0.402	0.205	0.396976
Mlycd	1.22464e-05	-1.20528	0.197	0.433	0.397446
Ogfrl1	1.22505e-05	-1.22523	0.254	0.493	0.397579
Cap2	1.26066e-05	0.683867	0.795	0.637	0.409136
Impdh2	1.27074e-05	1.16371	0.533	0.326	0.412405
Clk4	1.27414e-05	-0.917315	0.32	0.581	0.41351
Tlk1	1.28762e-05	-1.33699	0.197	0.433	0.417885
Irf2	1.30823e-05	-1.62595	0.107	0.321	0.424572
B4gat1	1.3159e-05	-1.14825	0.262	0.502	0.427064
Clk1	1.31674e-05	-1.05592	0.426	0.642	0.427333
Emc9	1.32012e-05	-1.19401	0.238	0.479	0.428432
Strn4	1.34165e-05	1.07678	0.5	0.284	0.435419
Gtf2ird1	1.34809e-05	1.24758	0.393	0.186	0.43751
Dbp	1.34887e-05	-1.39225	0.156	0.391	0.437761
Mphosph8	1.35542e-05	-0.839632	0.369	0.619	0.439887
Samm50	1.3941e-05	-0.66588	0.607	0.833	0.452442
H2afy2	1.41919e-05	1.37083	0.377	0.172	0.460585
Thra	1.42866e-05	-0.554287	0.713	0.86	0.463657
Pde1c	1.45126e-05	-1.21558	0.197	0.423	0.470991
Srpr	1.45967e-05	-0.967744	0.361	0.572	0.473722
Aaed1	1.47461e-05	-1.72043	0.074	0.274	0.478568
Tsr3	1.48085e-05	-1.18031	0.164	0.4	0.480595
Ecm1	1.48408e-05	2.74436	0.164	0.033	0.481644
Spen	1.49566e-05	-1.78676	0.09	0.293	0.485403
Copz1	1.51407e-05	1.20081	0.549	0.358	0.491375
Eef1e1	1.51708e-05	1.34909	0.418	0.219	0.492352
Trip12	1.51735e-05	1.00077	0.59	0.395	0.492442
Gna11	1.53591e-05	-0.863939	0.443	0.656	0.498464
Gtf2h5	1.54031e-05	-0.488195	0.82	0.926	0.499893
Dcn	1.54724e-05	4.00694	0.123	0.014	0.50214
Uqcrq	1.54979e-05	-0.258831	1	1	0.50297
Ifitm2	1.56218e-05	0.903994	0.615	0.428	0.506988
Slain2	1.56454e-05	1.15253	0.566	0.395	0.507754
Slc22a1	1.58297e-05	-0.483775	0.418	0.679	0.513739
Trak1	1.58326e-05	-0.936811	0.262	0.507	0.51383
Fbxo6	1.58463e-05	1.9148	0.303	0.13	0.514275
Mrps24	1.59242e-05	-0.40285	0.869	0.953	0.516804
Wdr83	1.6043e-05	-1.12131	0.148	0.386	0.520658
Sec22b	1.62297e-05	1.21829	0.492	0.307	0.526719
Gm26802	1.64005e-05	-4.84306	0	0.14	0.532262
Miga2	1.64005e-05	-3.99837	0	0.14	0.532262
Gm39469	1.64005e-05	-3.90431	0	0.14	0.532262
Eef1akmt2	1.64005e-05	-3.86823	0	0.14	0.532262
Tmem185a	1.64005e-05	-3.82822	0	0.14	0.532262
Spcs1	1.67115e-05	0.484333	0.951	0.893	0.542356
Rab33a	1.67263e-05	4.08078	0.098	0.005	0.542836
Rtn1	1.67263e-05	4.06419	0.098	0.005	0.542836
Rhoc	1.72094e-05	0.544178	0.926	0.856	0.558513
Ddt	1.72606e-05	2.07117	0.27	0.102	0.560175
Fam174a	1.73154e-05	-0.642309	0.549	0.763	0.561955
Slc36a1	1.74707e-05	3.23788	0.123	0.014	0.566995
Trappc2l	1.75583e-05	-0.54963	0.721	0.856	0.569837
Myadm	1.75912e-05	1.31646	0.484	0.288	0.570905
Stard3nl	1.76991e-05	1.19348	0.484	0.274	0.574407
Dctd	1.77074e-05	2.96797	0.123	0.014	0.574675
Fopnl	1.77224e-05	-0.684328	0.484	0.698	0.575162
Ppp1r12b	1.7984e-05	-0.855453	0.459	0.674	0.583653
Arf6	1.81672e-05	1.22537	0.443	0.242	0.5896
Maff	1.85821e-05	-1.35574	0.18	0.405	0.603062
Mrpl37	1.86852e-05	1.34756	0.393	0.195	0.606411
4833439L19Rik	1.87021e-05	0.900183	0.615	0.423	0.606959
Gars	1.88687e-05	1.0686	0.549	0.367	0.612364
Plcb4	1.91883e-05	1.24942	0.508	0.312	0.622738
Atp8a1	1.92711e-05	-1.25641	0.164	0.381	0.625423
Ppih	1.98852e-05	1.9461	0.246	0.084	0.645356
Ing2	2.01546e-05	-1.08744	0.172	0.414	0.654097
Gon4l	2.01738e-05	-1.36606	0.221	0.437	0.654719
Ubap2	2.01752e-05	-0.766604	0.32	0.553	0.654765
Tlcd1	2.04037e-05	-1.9921	0.066	0.256	0.662182
Tead1	2.05281e-05	0.80657	0.713	0.586	0.666219
Lsm14a	2.05898e-05	1.22767	0.492	0.307	0.668223
Acsl3	2.0656e-05	-0.662676	0.311	0.572	0.670369
Rnf5	2.0658e-05	1.27408	0.492	0.293	0.670436
Asna1	2.06798e-05	0.850514	0.607	0.423	0.671143
BC052040	2.10754e-05	2.48446	0.123	0.014	0.683981
Gap43	2.11178e-05	4.88723	0.082	0	0.685358
Krt8	2.11178e-05	4.34628	0.082	0	0.685358
Enthd2	2.11178e-05	4.31804	0.082	0	0.685358
Arhgdig	2.11178e-05	4.31465	0.082	0	0.685358
E530001K10Rik	2.11178e-05	4.29515	0.082	0	0.685358
Smim20.1	2.11178e-05	4.2437	0.082	0	0.685358
Efs	2.11178e-05	4.23868	0.082	0	0.685358
AA474331	2.11178e-05	4.16552	0.082	0	0.685358
Ints5	2.11178e-05	4.08802	0.082	0	0.685358
Wwc1	2.11178e-05	4.0832	0.082	0	0.685358
Pcnxl4	2.11178e-05	3.90513	0.082	0	0.685358
Gm16793	2.11178e-05	3.86966	0.082	0	0.685358
Fam104a	2.11477e-05	-0.585965	0.68	0.851	0.686327
1500035N22Rik	2.13756e-05	-2.14854	0.066	0.251	0.693724
Pfn2	2.13902e-05	-0.656919	0.541	0.763	0.694198
Nr3c1	2.15011e-05	-0.888844	0.344	0.581	0.697797
Babam1	2.18521e-05	1.1204	0.508	0.335	0.709188
Nr4a2	2.1879e-05	-2.47592	0.025	0.186	0.710061
Cdo1	2.18963e-05	-0.664003	0.213	0.47	0.710624
Ndufs3	2.22258e-05	-0.338146	0.959	0.977	0.721317
Snrpd2	2.22621e-05	0.452318	0.967	0.94	0.722493
Dusp5	2.2274e-05	-2.49918	0.025	0.186	0.72288
Gmfb	2.25388e-05	1.5855	0.336	0.149	0.731476
Nedd4	2.2753e-05	0.385253	0.975	0.977	0.738425
Nt5c2	2.2955e-05	1.37857	0.434	0.247	0.74498
Rhob	2.3072e-05	1.04407	0.631	0.437	0.74878
Gde1	2.32343e-05	-0.712852	0.598	0.805	0.754046
Nol11	2.33358e-05	-1.11532	0.23	0.479	0.757339
Smad6	2.33628e-05	1.48393	0.32	0.13	0.758215
Eipr1	2.33632e-05	-3.85227	0	0.135	0.75823
Rcc1l	2.33632e-05	-3.82213	0	0.135	0.75823
Wdcp	2.33632e-05	-3.80721	0	0.135	0.75823
Atrip	2.33632e-05	-3.79149	0	0.135	0.75823
Drd2	2.33632e-05	-3.56869	0	0.135	0.75823
Mrps2	2.34099e-05	2.02966	0.23	0.074	0.759743
Ttn	2.34127e-05	-0.517711	0.984	1	0.759837
D730003I15Rik	2.35001e-05	-2.45066	0.025	0.186	0.762673
Xpnpep1	2.35059e-05	1.12009	0.566	0.386	0.762862
Cry2	2.35891e-05	-1.18382	0.115	0.34	0.76556
Bag1	2.36115e-05	-0.46034	0.885	0.907	0.766288
Steap3	2.37619e-05	-2.04643	0.049	0.228	0.771168
Cxxc5	2.37899e-05	-0.610083	0.459	0.688	0.772078
Cpeb4	2.40118e-05	-1.12475	0.254	0.484	0.779279
Tgfbr2	2.40821e-05	2.10429	0.189	0.047	0.78156
Flrt2	2.45587e-05	1.4755	0.377	0.191	0.797029
Osgepl1	2.5358e-05	-1.36955	0.115	0.326	0.822967
Efna5	2.54571e-05	1.19915	0.41	0.205	0.826185
Ppil4	2.74168e-05	-0.915743	0.295	0.521	0.889786
Arpc5l	2.7601e-05	-0.582695	0.648	0.819	0.895764
Ankrd23	2.78456e-05	3.81806	0.107	0.009	0.9037
Srp9	2.81958e-05	-0.566812	0.689	0.828	0.915067
Nktr	2.82756e-05	-0.701193	0.492	0.758	0.917655
Dnaja2	2.84014e-05	-0.54845	0.705	0.847	0.92174
Ggps1	2.85432e-05	-1.45199	0.123	0.335	0.926341
Rbx1	2.86147e-05	-0.346373	0.959	0.995	0.928662
Luc7l3	2.88653e-05	0.588269	0.77	0.614	0.936793
Ino80d	2.89978e-05	1.52905	0.377	0.195	0.941096
Rad21	2.90894e-05	1.02066	0.508	0.302	0.944067
Akap9	2.92768e-05	-0.59522	0.516	0.753	0.95015
Timmdc1	2.94096e-05	1.21197	0.459	0.27	0.954458
Tmco1	2.98978e-05	0.780107	0.73	0.642	0.970303
Mrpl54	2.99535e-05	0.459444	0.91	0.874	0.972111
Ndufb8	2.99643e-05	-0.292003	0.984	1	0.972461
Ap1m1	3.03442e-05	1.32001	0.426	0.237	0.984789
Dapk3	3.04598e-05	0.938833	0.5	0.302	0.988544
Smtn	3.04796e-05	-1.18267	0.131	0.353	0.989186
Cutc	3.05817e-05	-3.1853	0.008	0.149	0.992499
Ehd1	3.068e-05	1.0264	0.508	0.307	0.995688
Pla2g5	3.08129e-05	-1.81133	0.066	0.251	1
Ier5l	3.11655e-05	-2.41986	0.041	0.209	1
Aco2	3.12078e-05	-0.334083	0.959	0.981	1
Dgkk	3.12229e-05	3.22431	0.107	0.009	1
Tubb4b	3.12349e-05	-0.680933	0.623	0.814	1
Zadh2	3.15786e-05	-1.17736	0.246	0.451	1
Syndig1	3.17452e-05	3.19493	0.148	0.028	1
Zcchc9	3.19081e-05	1.29265	0.426	0.233	1
Irak1bp1	3.19617e-05	-1.52244	0.09	0.288	1
Stx11	3.21312e-05	-3.40568	0.008	0.149	1
Tmem41b	3.22357e-05	-1.24079	0.238	0.465	1
Fam46a	3.24403e-05	-0.836116	0.582	0.749	1
Fubp1	3.26218e-05	0.936704	0.623	0.484	1
Cd36	3.272e-05	-0.823926	0.566	0.744	1
Ccrl2	3.27716e-05	-3.20688	0.008	0.149	1
Acp1	3.28448e-05	-0.588643	0.582	0.791	1
Ost4	3.29671e-05	0.562161	0.869	0.819	1
Akr1b10	3.29801e-05	1.29845	0.402	0.209	1
Ftl1-ps1	3.32319e-05	-3.9619	0	0.13	1
Stk32a	3.32319e-05	-3.93123	0	0.13	1
Riok2	3.32319e-05	-3.88155	0	0.13	1
Zfp992	3.32319e-05	-3.79385	0	0.13	1
Miga1	3.32319e-05	-3.73654	0	0.13	1
Capn15	3.32319e-05	-3.69408	0	0.13	1
AC110166.1	3.32319e-05	-3.65552	0	0.13	1
Mbtps2	3.34901e-05	2.59176	0.18	0.047	1
Emilin1	3.35277e-05	3.30774	0.107	0.009	1
3830403N18Rik	3.35277e-05	3.16203	0.107	0.009	1
Adipor1	3.35979e-05	0.689428	0.721	0.647	1
Ctdsp1	3.39496e-05	1.51472	0.393	0.209	1
Ssr3	3.4101e-05	0.803341	0.746	0.642	1
Btf3	3.42904e-05	0.336553	0.992	0.972	1
Sorl1	3.44365e-05	-1.91775	0.057	0.237	1
Gm7334	3.44941e-05	2.93121	0.107	0.009	1
Pet100	3.46312e-05	0.956393	0.631	0.493	1
Cyb5r1	3.49694e-05	2.30809	0.221	0.074	1
Klhl20	3.51289e-05	2.01144	0.213	0.065	1
Smim10l1	3.52307e-05	-0.56004	0.582	0.767	1
Tspan3	3.53073e-05	-0.463471	0.836	0.953	1
Acbd3	3.53122e-05	-0.742422	0.328	0.572	1
Caprin1	3.53681e-05	0.749437	0.656	0.484	1
Mrpl9	3.55914e-05	-1.04254	0.311	0.516	1
Serf1	3.57683e-05	0.808942	0.721	0.595	1
Tacc1	3.64932e-05	-1.0356	0.246	0.479	1
Ctsz	3.74443e-05	1.03938	0.508	0.316	1
Sik3	3.82251e-05	-1.47811	0.156	0.363	1
Napg	3.84603e-05	-1.26746	0.189	0.409	1
Rps16	3.86229e-05	0.231462	1	1	1
Fam32a	3.87514e-05	0.801325	0.697	0.526	1
Nmrk2	3.95173e-05	2.54979	0.189	0.051	1
Ireb2	3.97899e-05	1.44127	0.352	0.172	1
Stk24	4.00798e-05	-1.36686	0.115	0.321	1
Gtsf1	4.01569e-05	2.78915	0.197	0.056	1
Sspn	4.02761e-05	-0.688164	0.68	0.809	1
Ap1s1	4.02855e-05	0.923332	0.549	0.344	1
S100a4	4.04949e-05	-1.82245	0.033	0.195	1
Tmem55a	4.06027e-05	0.998722	0.549	0.33	1
Tubb6	4.10693e-05	2.36766	0.189	0.051	1
Sesn3	4.14995e-05	1.1504	0.492	0.312	1
Capg	4.19197e-05	2.38507	0.164	0.037	1
AU022252	4.20594e-05	1.93423	0.27	0.112	1
Hyal2	4.25974e-05	1.46273	0.361	0.177	1
Insig1	4.26687e-05	-1.1728	0.123	0.335	1
Rab11b	4.32573e-05	0.680297	0.82	0.772	1
Stt3a	4.35433e-05	1.43715	0.328	0.149	1
Csrp3	4.35775e-05	0.520837	0.984	1	1
Phc1	4.36901e-05	1.95649	0.197	0.056	1
Ndufs5	4.37963e-05	-0.283007	0.975	1	1
Tra2b	4.38326e-05	-0.66702	0.803	0.865	1
Fgf18	4.39339e-05	-2.43659	0.025	0.177	1
Fstl1	4.39871e-05	0.454671	0.951	0.916	1
Emc7	4.41137e-05	-0.570268	0.623	0.842	1
Prkag3	4.41538e-05	2.98734	0.115	0.014	1
Ppp1r12a	4.42362e-05	-0.604472	0.59	0.758	1
Rcn1	4.4658e-05	1.24367	0.467	0.312	1
Phf3	4.51885e-05	-0.760421	0.361	0.586	1
Spata6	4.55828e-05	2.31656	0.164	0.037	1
Pank1	4.63581e-05	-0.813556	0.377	0.609	1
Fam8a1	4.69481e-05	1.04844	0.475	0.27	1
Gm26669	4.71999e-05	-3.83171	0	0.126	1
Ints6l	4.71999e-05	-3.80005	0	0.126	1
Ints11	4.72002e-05	-3.63197	0	0.126	1
Iqsec2	4.73711e-05	1.34765	0.377	0.195	1
Cstf2t	4.75487e-05	1.88314	0.27	0.112	1
Dynll2	4.78151e-05	-0.479294	0.77	0.916	1
Calr	4.7932e-05	0.688077	0.926	0.879	1
Sdc3	4.80991e-05	1.65748	0.23	0.074	1
Paip1	4.83926e-05	-1.2303	0.148	0.363	1
Cbfb	4.87739e-05	1.3722	0.352	0.167	1
Klhdc1	4.91079e-05	-1.37207	0.098	0.298	1
Dok5	4.92146e-05	2.08087	0.172	0.042	1
Thap4	4.93657e-05	1.5581	0.311	0.14	1
Gorasp2	4.95582e-05	1.25181	0.484	0.321	1
Hnmt	4.96927e-05	-2.27791	0.025	0.177	1
Spats2l	5.02036e-05	-1.27729	0.09	0.293	1
Iscu	5.0235e-05	-0.477822	0.795	0.893	1
Afap1l1	5.02974e-05	-0.876568	0.279	0.512	1
Prps2	5.05563e-05	1.91624	0.23	0.079	1
Klhl24	5.06216e-05	-0.818065	0.508	0.688	1
Fam57a	5.12866e-05	3.0938	0.09	0.005	1
Cwc22	5.14715e-05	1.28541	0.402	0.209	1
Rbm3	5.20447e-05	-0.418604	0.893	0.963	1
Top2a	5.20867e-05	3.02894	0.09	0.005	1
Casp6	5.2795e-05	1.7287	0.238	0.084	1
Map1b	5.33263e-05	-0.464146	0.762	0.912	1
Atp5e	5.34639e-05	-0.228834	0.992	1	1
Pex7	5.40334e-05	-0.942264	0.287	0.507	1
Gba2	5.43995e-05	1.9641	0.164	0.037	1
Ndrg2	5.44633e-05	0.370164	0.943	0.949	1
Mpzl1	5.50282e-05	1.30223	0.418	0.251	1
Tbc1d7	5.54066e-05	0.94799	0.533	0.344	1
Pnrc2	5.54936e-05	1.00956	0.541	0.349	1
Ramp2	5.61936e-05	4.84925	0.074	0	1
Cdca8	5.61936e-05	4.66368	0.074	0	1
Kdr	5.61936e-05	4.61919	0.074	0	1
Garem	5.61936e-05	4.13775	0.074	0	1
Gm10126	5.61936e-05	4.13557	0.074	0	1
Xrcc6bp1	5.61936e-05	4.08014	0.074	0	1
Apitd1	5.61936e-05	4.03105	0.074	0	1
Ntn4	5.61936e-05	3.95627	0.074	0	1
2810417H13Rik	5.61936e-05	3.93816	0.074	0	1
Gm13157	5.61936e-05	3.91877	0.074	0	1
Ece2	5.61936e-05	3.80324	0.074	0	1
Gm18025	5.61936e-05	3.79314	0.074	0	1
Ftsj2	5.61936e-05	3.73723	0.074	0	1
Src	5.62229e-05	2.90149	0.123	0.019	1
Zfp36l1	5.63107e-05	0.592787	0.828	0.735	1
Sept4	5.66536e-05	-1.98543	0.025	0.177	1
Erlec1	5.67479e-05	-0.883452	0.344	0.563	1
Tspan7	5.76189e-05	1.29624	0.393	0.214	1
Suz12	5.79041e-05	-0.986394	0.27	0.484	1
Ipo7	5.79856e-05	0.985982	0.549	0.377	1
Slc4a4	5.84671e-05	2.01008	0.254	0.098	1
Sh3bgrl3	5.8832e-05	1.31243	0.434	0.265	1
Usp22	5.88545e-05	1.36362	0.426	0.26	1
Hcfc1r1	5.95969e-05	0.311178	0.967	0.972	1
P3h2	5.96837e-05	2.35446	0.197	0.06	1
Xpa	6.04095e-05	-1.15717	0.172	0.391	1
Rbm6	6.07295e-05	1.34704	0.41	0.233	1
Col12a1	6.18681e-05	1.29872	0.377	0.191	1
Tspan31	6.18874e-05	0.767725	0.541	0.33	1
Ppil6	6.21255e-05	-2.63944	0.016	0.158	1
Ddx42	6.23003e-05	-1.05864	0.238	0.451	1
Ctbp1	6.26067e-05	0.75099	0.664	0.526	1
Acd	6.32339e-05	1.61366	0.254	0.098	1
Stx8	6.33039e-05	-0.852909	0.418	0.628	1
Adprh	6.35636e-05	0.942038	0.59	0.428	1
Purb	6.36174e-05	-0.471048	0.77	0.902	1
Lgi2	6.38089e-05	-2.98041	0.008	0.14	1
Trappc1	6.4715e-05	0.648633	0.77	0.67	1
Lman2	6.66302e-05	1.09956	0.508	0.326	1
Asb2	6.68422e-05	0.629736	0.836	0.8	1
Sned1	6.69452e-05	-3.83185	0	0.121	1
Stn1	6.69452e-05	-3.81248	0	0.121	1
Cdh16	6.69452e-05	-3.78899	0	0.121	1
Prmt9	6.69452e-05	-3.75821	0	0.121	1
Gm31251	6.69452e-05	-3.75	0	0.121	1
Styx	6.69452e-05	-3.69917	0	0.121	1
Ric8a	6.69452e-05	-3.69099	0	0.121	1
Mrm2	6.69452e-05	-3.65425	0	0.121	1
Ripor1	6.69452e-05	-3.6295	0	0.121	1
Rxrg	6.69452e-05	-3.57528	0	0.121	1
Pkib	6.70024e-05	-2.17771	0.057	0.223	1
Gm26532	6.72774e-05	-2.94223	0.025	0.167	1
Uty	6.72777e-05	2.11551	0.205	0.065	1
Zfhx3	6.72849e-05	1.95926	0.279	0.121	1
Wnk2	6.74632e-05	-2.18674	0.016	0.158	1
Kcnb1	6.77339e-05	-2.20214	0.025	0.172	1
Herc3	7.06742e-05	-0.853689	0.303	0.54	1
Kcnj12	7.08201e-05	-1.48682	0.09	0.274	1
4921504A21Rik	7.10513e-05	-2.78843	0.008	0.14	1
Paip2	7.13151e-05	0.420785	0.959	0.921	1
Tceal5	7.13822e-05	1.29175	0.361	0.181	1
Itm2a	7.16536e-05	1.28712	0.5	0.326	1
Wnt5b	7.3138e-05	3.60182	0.098	0.009	1
1500009L16Rik	7.34313e-05	-0.790016	0.41	0.651	1
[truncated: 11,016 more rows]

## Sheet: E-PF vs P-PF
Gene	p_val	avg_log2FC	pct.1	pct.2	p_val_adj
Tceb2	0	15.677	1	0	0
Sepw1	0	15.4702	0.984	0	0
Shfm1	0	15.1067	0.984	0	0
Myeov2	0	14.6756	0.968	0	0
Gnb2l1	0	14.5021	0.968	0	0
RP23-455C13.7	0	14.4459	0.937	0	0
Crnde	0	14.304	0.921	0	0
Selm	0	14.152	0.905	0	0
1110001J03Rik	0	14.049	0.889	0	0
Ngfrap1	0	14.0084	0.937	0	0
Gm10709	0	13.8923	0.905	0	0
Tceb1	0	13.7924	0.841	0	0
Wbp5	0	13.7203	0.873	0	0
Gbas	0	13.6162	0.857	0	0
Ptrf	0	13.5444	0.857	0	0
Zak	0	13.5106	0.794	0	0
Selk	0	13.4607	0.841	0	0
Atp5o	0	13.44	1	0.003	0
2810428I15Rik	0	13.3794	0.825	0	0
2700060E02Rik	0	13.3333	0.873	0	0
Gm8730	0	13.2241	0.714	0	0
Sepp1	0	13.1814	0.714	0	0
Deb1	0	13.1035	0.714	0	0
1810043H04Rik	0	12.9046	0.698	0	0
Selt	0	12.8781	0.667	0	0
Cxx1a	0	12.8612	0.667	0	0
Tmem261	0	12.7412	0.651	0	0
Fam195b	0	12.6791	0.667	0	0
2310036O22Rik	0	12.6646	0.651	0	0
Sep15	0	12.6391	0.635	0	0
Rpl23a-ps3	0	12.5958	0.619	0	0
Gm561	0	12.54	0.683	0	0
Zfos1	0	12.5388	0.571	0	0
Nhp2l1	0	12.4731	0.635	0	0
Lyrm5	0	12.3681	0.571	0	0
2210013O21Rik	0	12.3278	0.587	0	0
Apoa1bp	0	12.3144	0.587	0	0
Erbb2ip	0	12.2839	0.587	0	0
Hn1	0	12.2722	0.54	0	0
Fam134b	0	12.2541	0.556	0	0
Cxx1b	0	12.2182	0.587	0	0
Gltscr2	0	12.1371	0.571	0	0
Stra13	0	12.1369	0.556	0	0
Ict1	0	12.0947	0.508	0	0
Fam195a	0	12.0488	0.54	0	0
Gm9843	0	12.0251	0.524	0	0
Gm10250	0	12.0102	0.54	0	0
Slmo2	0	11.9479	0.492	0	0
2700094K13Rik	0	11.9254	0.429	0	0
Vimp	0	11.8464	0.476	0	0
Mesdc2	0	11.8026	0.429	0	0
Ppp2r4	0	11.7882	0.381	0	0
Pvrl2	0	11.7148	0.476	0	0
Adck3	0	11.6573	0.397	0	0
Dpcd	0	11.6189	0.397	0	0
Carkd	0	11.4576	0.365	0	0
Prkrir	0	11.4346	0.381	0	0
Rpl6l	0	11.4337	0.333	0	0
0610011F06Rik	0	11.4162	0.397	0	0
Adrbk2	0	11.4084	0.381	0	0
B630005N14Rik	0	11.3662	0.333	0	0
Rps18-ps3	0	11.3654	0.349	0	0
Sdpr	0	11.3296	0.27	0	0
N6amt2	0	11.3222	0.317	0	0
Gucy1a3	0	11.3098	0.317	0	0
Hiatl1	0	11.2908	0.365	0	0
Pvrl3	0	11.2831	0.349	0	0
Ctage5	0	11.2417	0.349	0	0
Asun	0	11.2392	0.349	0	0
Whsc1l1	0	11.234	0.317	0	0
Utp11l	0	11.2299	0.317	0	0
Rps26-ps1	0	11.2287	0.333	0	0
Smek1	0	11.2075	0.302	0	0
Sepn1	0	11.2027	0.286	0	0
RP23-378D16.4	0	11.1894	0.286	0	0
Murc	0	11.1675	0.302	0	0
Rfwd2	0	11.1665	0.333	0	0
Toporsos	0	11.1648	0.349	0	0
Ndnl2	0	11.1375	0.286	0	0
Ufd1l	0	11.0935	0.286	0	0
E530001K10Rik	0	11.0244	0.27	0	0
Prune	0	11.0141	0.302	0	0
Smek2	0	10.9566	0.333	0	0
Ddx26b	0	10.9345	0.286	0	0
Hiat1	0	10.9287	0.27	0	0
2700029M09Rik	0	10.9202	0.286	0	0
Atp5sl	0	10.8995	0.27	0	0
Gm5900	0	10.7627	0.27	0	0
Srp54b	0	9.8934	0.524	0.001	0
Igf2	0	8.26539	0.619	0.007	0
Rpl10	9.25384e-205	7.78455	1	0.061	3.00324e-200
Suv420h1	3.89748e-290	11	0.254	0	1.26489e-285
Ccdc53	3.89748e-290	10.9852	0.254	0	1.26489e-285
9430016H08Rik	3.89748e-290	10.9414	0.254	0	1.26489e-285
Atn1.1	3.89748e-290	10.8997	0.254	0	1.26489e-285
Gm6483	3.89748e-290	10.6614	0.254	0	1.26489e-285
Rtfdc1	4.374e-272	10.847	0.238	0	1.41954e-267
Large	4.374e-272	10.755	0.238	0	1.41954e-267
Fam63b	4.374e-272	10.7521	0.238	0	1.41954e-267
Fam188a	4.374e-272	10.6656	0.238	0	1.41954e-267
Tmem35	4.374e-272	10.6485	0.238	0	1.41954e-267
1700040L02Rik	4.374e-272	10.5792	0.238	0	1.41954e-267
Whsc1	4.84273e-254	11.0907	0.222	0	1.57166e-249
Bre	4.84273e-254	10.8444	0.222	0	1.57166e-249
AK010878	4.84273e-254	10.8196	0.222	0	1.57166e-249
BC030336	4.84273e-254	10.6797	0.222	0	1.57166e-249
Peo1	4.84273e-254	10.5838	0.222	0	1.57166e-249
1810026J23Rik	4.84273e-254	10.5261	0.222	0	1.57166e-249
Setd8	4.84273e-254	10.5102	0.222	0	1.57166e-249
Fam21	4.84273e-254	10.4668	0.222	0	1.57166e-249
Hdgfrp3	4.84273e-254	10.4035	0.222	0	1.57166e-249
Nudt8	2.0572e-243	7.43713	0.444	0.006	6.67642e-239
Mettl10	5.2913e-236	10.6416	0.206	0	1.71724e-231
Fam132a	5.2913e-236	10.5583	0.206	0	1.71724e-231
Rpl36-ps3	5.2913e-236	10.5385	0.206	0	1.71724e-231
0610007P14Rik	5.2913e-236	10.4069	0.206	0	1.71724e-231
BC026585	5.2913e-236	10.3597	0.206	0	1.71724e-231
A230046K03Rik	5.2913e-236	10.2101	0.206	0	1.71724e-231
Fdx1l	6.39042e-234	7.91574	0.333	0.002	2.07395e-229
Tonsl	0	7.59712	0.635	0.007	0
Fam134a	5.70787e-218	10.6285	0.19	0	1.85243e-213
l7Rn6	5.70787e-218	10.4984	0.19	0	1.85243e-213
C330006A16Rik	5.70787e-218	10.3454	0.19	0	1.85243e-213
Hist1h2al	5.70787e-218	10.2974	0.19	0	1.85243e-213
BC023829	5.70787e-218	10.1542	0.19	0	1.85243e-213
Hba-a1	6.69734e-203	7.46632	0.889	0.045	2.17355e-198
Hbb-bt	5.73214e-127	6.99745	0.524	0.023	1.86031e-122
0610009L18Rik	6.08209e-200	10.3318	0.175	0	1.97388e-195
Lnp	6.08209e-200	10.2263	0.175	0	1.97388e-195
Gm16586	6.08209e-200	10.2198	0.175	0	1.97388e-195
Mllt4	6.08209e-200	10.1335	0.175	0	1.97388e-195
Suv420h2	6.08209e-200	10.0819	0.175	0	1.97388e-195
Gucy1b3	6.08209e-200	9.93423	0.175	0	1.97388e-195
Tceb3	6.08209e-200	9.9065	0.175	0	1.97388e-195
Raver1	1.46582e-186	8.88515	0.19	0	4.75717e-182
BC029214	6.40601e-182	10.2736	0.159	0	2.07901e-177
Prkcdbp	6.40601e-182	10.2547	0.159	0	2.07901e-177
Fam65a	6.40601e-182	10.2433	0.159	0	2.07901e-177
Vprbp	6.40601e-182	10.1656	0.159	0	2.07901e-177
Adrbk1	6.40601e-182	10.1483	0.159	0	2.07901e-177
Wash1	6.40601e-182	10.0244	0.159	0	2.07901e-177
1110037F02Rik	6.40601e-182	9.9937	0.159	0	2.07901e-177
Fam73a	6.40601e-182	9.98418	0.159	0	2.07901e-177
Prosc	6.40601e-182	9.94773	0.159	0	2.07901e-177
D930015E06Rik	6.40601e-182	9.93663	0.159	0	2.07901e-177
Wbscr22	6.40601e-182	9.87558	0.159	0	2.07901e-177
H19	6.9866e-167	6.17821	0.667	0.029	2.26743e-162
Csrp2bp	6.67511e-164	9.742	0.143	0	2.16634e-159
Vwa9	6.67511e-164	9.67342	0.143	0	2.16634e-159
E430025E21Rik	6.67511e-164	9.57871	0.143	0	2.16634e-159
Fam134c	6.88937e-146	10.2837	0.127	0	2.23588e-141
Fam175b	6.88937e-146	9.985	0.127	0	2.23588e-141
Obfc1	6.88937e-146	9.94974	0.127	0	2.23588e-141
Ldoc1l	6.88937e-146	9.92431	0.127	0	2.23588e-141
PISD	6.88937e-146	9.92203	0.127	0	2.23588e-141
Fam178a	6.88937e-146	9.90623	0.127	0	2.23588e-141
Fam73b	6.88937e-146	9.8576	0.127	0	2.23588e-141
Gm21092	6.88937e-146	9.85299	0.127	0	2.23588e-141
2310015A10Rik	6.88937e-146	9.84204	0.127	0	2.23588e-141
Ccbl1	6.88937e-146	9.81421	0.127	0	2.23588e-141
6330416G13Rik	6.88937e-146	9.70652	0.127	0	2.23588e-141
Hdgfrp2	6.88937e-146	9.69874	0.127	0	2.23588e-141
Klhl17	6.88937e-146	9.63775	0.127	0	2.23588e-141
A930011G23Rik	6.88937e-146	9.57631	0.127	0	2.23588e-141
Taf4a	6.88937e-146	9.45449	0.127	0	2.23588e-141
Pam16	4.95962e-223	6.15216	0.825	0.033	1.6096e-218
Sept2	1.42031e-135	5.74497	0.698	0.042	4.60948e-131
Commd5	1.97027e-130	6.98775	0.238	0.003	6.39433e-126
Ric8	7.05455e-128	9.74257	0.111	0	2.28948e-123
Rpl13-ps3	7.05455e-128	9.64544	0.111	0	2.28948e-123
Ept1	7.05455e-128	9.52738	0.111	0	2.28948e-123
Erdr1	7.05455e-128	9.46713	0.111	0	2.28948e-123
B930041F14Rik	7.05455e-128	9.35483	0.111	0	2.28948e-123
Hbb-bs	3.10515e-82	5.68656	0.968	0.177	1.00775e-77
Wbscr16	7.1842e-110	9.72673	0.095	0	2.33156e-105
Pcnxl3	7.1842e-110	9.47272	0.095	0	2.33156e-105
D15Ertd621e	7.1842e-110	9.44049	0.095	0	2.33156e-105
Gm10116	7.1842e-110	9.40442	0.095	0	2.33156e-105
Mesdc1	7.1842e-110	9.38295	0.095	0	2.33156e-105
Fam65b	7.1842e-110	9.38149	0.095	0	2.33156e-105
Pddc1	7.1842e-110	9.32115	0.095	0	2.33156e-105
Gm15800	7.1842e-110	9.30285	0.095	0	2.33156e-105
Fam179b	7.1842e-110	9.2969	0.095	0	2.33156e-105
RP23-457J22.1	7.1842e-110	9.25143	0.095	0	2.33156e-105
Eftud1	7.1842e-110	9.24321	0.095	0	2.33156e-105
Pacrgl	7.1842e-110	9.22129	0.095	0	2.33156e-105
Schip1.1	7.1842e-110	9.2171	0.095	0	2.33156e-105
A830080D01Rik	7.1842e-110	9.16362	0.095	0	2.33156e-105
Gm13251	7.1842e-110	9.16244	0.095	0	2.33156e-105
Gm21967	7.1842e-110	9.11985	0.095	0	2.33156e-105
Hgs	3.93608e-94	9.00567	0.095	0	1.27742e-89
Fam175a	7.3035e-92	9.21769	0.079	0	2.37028e-87
Pcnxl4	7.3035e-92	9.21763	0.079	0	2.37028e-87
6330408A02Rik	7.3035e-92	9.18463	0.079	0	2.37028e-87
Garem	7.3035e-92	9.12426	0.079	0	2.37028e-87
Smim20.1	7.3035e-92	9.11923	0.079	0	2.37028e-87
1810011O10Rik	7.3035e-92	9.0899	0.079	0	2.37028e-87
5730508B09Rik	7.3035e-92	9.0647	0.079	0	2.37028e-87
Tssc1	7.3035e-92	9.05985	0.079	0	2.37028e-87
D2Wsu81e	7.3035e-92	9.02324	0.079	0	2.37028e-87
Fam63a	7.3035e-92	9.02185	0.079	0	2.37028e-87
AI846148	7.3035e-92	8.94668	0.079	0	2.37028e-87
Gm10110	7.3035e-92	8.90528	0.079	0	2.37028e-87
Rxfp1	7.72369e-89	5.48434	0.444	0.025	2.50665e-84
Rpl27	5.0443e-133	5.68493	0.968	0.097	1.63708e-128
Rps27	7.06175e-50	4.96452	1	0.449	2.29182e-45
Gm14698	1.37148e-74	5.71868	0.302	0.013	4.45101e-70
Gltscr1l	7.45831e-74	9.21382	0.063	0	2.42052e-69
Speer4e	7.45831e-74	9.12525	0.063	0	2.42052e-69
Lipo1	7.45831e-74	9.02805	0.063	0	2.42052e-69
DHRSX	7.45831e-74	8.96249	0.063	0	2.42052e-69
Enthd2	7.45831e-74	8.94962	0.063	0	2.42052e-69
Mfsd7b	7.45831e-74	8.93964	0.063	0	2.42052e-69
Rqcd1	7.45831e-74	8.92352	0.063	0	2.42052e-69
Cml1	7.45831e-74	8.92044	0.063	0	2.42052e-69
Gm9755	7.45831e-74	8.90466	0.063	0	2.42052e-69
2610305D13Rik	7.45831e-74	8.8517	0.063	0	2.42052e-69
Prmt10	7.45831e-74	8.80293	0.063	0	2.42052e-69
Gm10263	7.45831e-74	8.77635	0.063	0	2.42052e-69
Gm15440	7.45831e-74	8.75414	0.063	0	2.42052e-69
Ifi30	7.45831e-74	8.75286	0.063	0	2.42052e-69
Agpat9	7.45831e-74	8.75095	0.063	0	2.42052e-69
Zswim6	7.45831e-74	8.74658	0.063	0	2.42052e-69
Qtrtd1	7.45831e-74	8.72321	0.063	0	2.42052e-69
Mir143hg	7.45831e-74	8.70037	0.063	0	2.42052e-69
Apitd1	7.45831e-74	8.67032	0.063	0	2.42052e-69
Cirh1a	7.45831e-74	8.61906	0.063	0	2.42052e-69
3010026O09Rik	7.45831e-74	8.60827	0.063	0	2.42052e-69
Rps12	2.43072e-62	4.87798	0.968	0.263	7.88866e-58
Nnt	9.1356e-77	4.83187	0.667	0.073	2.96487e-72
Rpl13a	2.80874e-47	4.77665	1	0.522	9.11548e-43
Gm10094	7.74061e-56	8.63451	0.048	0	2.51214e-51
2810030D12Rik	7.74061e-56	8.60983	0.048	0	2.51214e-51
Fam179a	7.74061e-56	8.57436	0.048	0	2.51214e-51
Inadl	7.74061e-56	8.57327	0.048	0	2.51214e-51
2410016O06Rik	7.74061e-56	8.57256	0.048	0	2.51214e-51
Zcchc5	7.74061e-56	8.57033	0.048	0	2.51214e-51
Fabp3-ps1	7.74061e-56	8.56488	0.048	0	2.51214e-51
B230110C06Rik	7.74061e-56	8.54841	0.048	0	2.51214e-51
Ints5	7.74061e-56	8.52158	0.048	0	2.51214e-51
AA415398	7.74061e-56	8.51907	0.048	0	2.51214e-51
Gm10020	7.74061e-56	8.51384	0.048	0	2.51214e-51
Gm7293	7.74061e-56	8.49295	0.048	0	2.51214e-51
Tmem8c	7.74061e-56	8.49281	0.048	0	2.51214e-51
RP23-218K15.3	7.74061e-56	8.45795	0.048	0	2.51214e-51
Rnmtl1	7.74061e-56	8.41547	0.048	0	2.51214e-51
Ftsj2	7.74061e-56	8.40933	0.048	0	2.51214e-51
Phxr4	7.74061e-56	8.40596	0.048	0	2.51214e-51
Lace1	7.74061e-56	8.33571	0.048	0	2.51214e-51
Fam188b	7.74061e-56	8.3158	0.048	0	2.51214e-51
Gm13225	7.74061e-56	8.30711	0.048	0	2.51214e-51
Aim1l	7.74061e-56	8.29373	0.048	0	2.51214e-51
1700007L15Rik	7.74061e-56	8.27714	0.048	0	2.51214e-51
Cecr5	7.74061e-56	8.2746	0.048	0	2.51214e-51
C030039L03Rik	7.74061e-56	8.27312	0.048	0	2.51214e-51
3110056K07Rik	7.74061e-56	8.22065	0.048	0	2.51214e-51
Hba-a2	1.89602e-54	5.90375	0.238	0.011	6.15334e-50
Btf3l4	1.90031e-72	4.48998	0.825	0.131	6.16726e-68
Bgn	2.90664e-49	6.90483	0.063	0	9.4332e-45
Nutf2	1.09029e-48	5.64996	0.175	0.006	3.53843e-44
Gm8797	2.6585e-57	4.11584	0.778	0.147	8.62791e-53
Lyz2	7.90481e-28	3.93455	0.603	0.151	2.56543e-23
Pcsk6	1.4484e-46	4.94871	0.254	0.015	4.70064e-42
Gpx3	5.25911e-34	3.91801	0.937	0.666	1.70679e-29
Myl7	1.62321e-15	3.79497	0.651	0.333	5.26798e-11
Rnaset2a	2.73395e-43	4.63743	0.444	0.054	8.87276e-39
Gapdh	1.51358e-42	3.75882	1	0.863	4.91216e-38
Myl4	6.56269e-23	3.67508	0.825	0.489	2.12985e-18
Elob	1.66767e-42	-9.41616	0	1	5.41226e-38
Atp5o.1	1.66767e-42	-9.93339	0	1	5.41226e-38
Sem1	1.72891e-42	-8.97213	0	1	5.611e-38
Fabp3	2.98776e-40	-3.18786	0.921	1	9.69647e-36
Selenow	3.42578e-42	-8.70219	0	0.996	1.1118e-37
Mb	2.27328e-22	-2.63579	0.524	0.951	7.37771e-18
Rack1	9.34059e-42	-8.22563	0	0.991	3.03139e-37
Myo3b	1.0799e-41	6.53144	0.079	0.001	3.5047e-37
Rpl15	3.46833e-42	-2.62334	0.889	1	1.12561e-37
Gm42418	4.36627e-16	-2.40463	0.794	0.998	1.41703e-11
Ppp1r3c	2.35589e-44	3.63765	0.873	0.282	7.64582e-40
Rpl36al	4.21003e-47	3.61205	1	0.487	1.36632e-42
mt-Nd4l	5.31065e-41	-2.31349	0.984	1	1.72352e-36
Rtraf	6.66869e-40	-7.61665	0	0.968	2.16426e-35
Bmp7	9.27694e-44	3.54251	0.635	0.116	3.01074e-39
Fmc1	9.12026e-40	-7.69936	0	0.966	2.95989e-35
Eloc	1.76264e-39	-7.39451	0	0.962	5.72047e-35
Myh6	2.86139e-36	-2.02364	0.937	1	9.28635e-32
Cops9	2.8592e-39	-7.50631	0	0.959	9.27924e-35
Selenok	3.51623e-39	-7.36022	0	0.958	1.14116e-34
Pgk1	3.56755e-39	-4.81544	0.127	0.973	1.15781e-34
Spag7	6.10134e-29	3.38858	0.635	0.176	1.98013e-24
Ephb3	4.37693e-32	3.3664	0.651	0.167	1.42049e-27
Rex1bd	3.97977e-38	-7.33498	0	0.945	1.2916e-33
Gm45716	6.8384e-38	-7.49775	0	0.942	2.21933e-33
Gm11744	8.38014e-38	8.75859	0.032	0	2.71969e-33
RP24-330M21.1	8.38014e-38	8.46721	0.032	0	2.71969e-33
Tmem194	8.38014e-38	8.43989	0.032	0	2.71969e-33
Gm43949	8.38014e-38	8.36124	0.032	0	2.71969e-33
Gm17541	8.38014e-38	8.2616	0.032	0	2.71969e-33
Gm13139	8.38014e-38	8.22222	0.032	0	2.71969e-33
Gm8444	8.38014e-38	8.21024	0.032	0	2.71969e-33
9030407P20Rik	8.38014e-38	8.19458	0.032	0	2.71969e-33
2410022M11Rik	8.38014e-38	8.19249	0.032	0	2.71969e-33
Gp1bb	8.38014e-38	8.16921	0.032	0	2.71969e-33
Gm10126	8.38014e-38	8.15816	0.032	0	2.71969e-33
B430203G13Rik	8.38014e-38	8.14451	0.032	0	2.71969e-33
4833422M21Rik	8.38014e-38	8.13943	0.032	0	2.71969e-33
Gm37276	8.38014e-38	8.10195	0.032	0	2.71969e-33
Wfdc10	8.38014e-38	8.09712	0.032	0	2.71969e-33
Cpsf3l	8.38014e-38	8.08024	0.032	0	2.71969e-33
Chrdl1	8.38014e-38	8.07758	0.032	0	2.71969e-33
Gm5595	8.38014e-38	8.06863	0.032	0	2.71969e-33
9330151L19Rik	8.38014e-38	8.06078	0.032	0	2.71969e-33
Figf	8.38014e-38	8.0582	0.032	0	2.71969e-33
Wbscr27	8.38014e-38	8.04493	0.032	0	2.71969e-33
Gm17491	8.38014e-38	8.04493	0.032	0	2.71969e-33
Athl1	8.38014e-38	8.04412	0.032	0	2.71969e-33
Sqrdl	8.38014e-38	8.02517	0.032	0	2.71969e-33
RP24-259P13.2	8.38014e-38	8.01667	0.032	0	2.71969e-33
Hrsp12	8.38014e-38	7.95204	0.032	0	2.71969e-33
BC068281	8.38014e-38	7.941	0.032	0	2.71969e-33
Fam101b	8.38014e-38	7.92118	0.032	0	2.71969e-33
RP23-291B1.2	8.38014e-38	7.87309	0.032	0	2.71969e-33
Cep83os	8.38014e-38	7.85733	0.032	0	2.71969e-33
Gm9726	8.38014e-38	7.83985	0.032	0	2.71969e-33
Gm9828	8.38014e-38	7.81851	0.032	0	2.71969e-33
Gm9776	8.38014e-38	7.80286	0.032	0	2.71969e-33
Gm6576	8.38014e-38	7.72854	0.032	0	2.71969e-33
4930451G09Rik	8.38014e-38	7.6331	0.032	0	2.71969e-33
Bex3	2.37264e-37	-7.32053	0	0.934	7.70018e-33
Selenom	7.61957e-37	-7.50217	0	0.928	2.47286e-32
Ech1	3.35777e-34	-1.98827	0.794	0.998	1.08973e-29
Jund	9.38469e-25	-1.97012	0.762	0.983	3.04571e-20
Ubb	1.15572e-41	-1.96913	1	1	3.75078e-37
Wdr89	1.74868e-28	3.27897	0.603	0.157	5.67517e-24
Jun	3.42695e-36	-4.28148	0.333	0.976	1.11218e-31
5430431A17Rik	4.37569e-36	-7.36442	0	0.918	1.42009e-31
Pmepa1	1.20707e-22	-1.88405	0.54	0.956	3.91742e-18
Ankrd63	4.59669e-24	3.08003	0.571	0.166	1.49181e-19
Gadd45b	1.18715e-35	-5.01728	0.27	0.954	3.85279e-31
Ncan	3.24955e-35	5.95922	0.111	0.003	1.05461e-30
Snu13	6.0534e-35	-6.88317	0	0.902	1.96457e-30
Mdk	1.16664e-34	4.52628	0.222	0.016	3.78622e-30
Gm10076	3.81988e-24	3.07415	0.603	0.191	1.2397e-19
Ss18l2	2.4658e-34	-6.95915	0	0.894	8.00252e-30
Acaa2	1.0223e-32	-1.8795	0.778	0.997	3.31777e-28
Gipr	1.40385e-20	2.84466	0.508	0.144	4.55606e-16
Fos	1.09621e-33	-4.14889	0.159	0.949	3.55765e-29
Tpm1	2.73062e-42	-1.81576	1	1	8.86197e-38
Rps18	5.18551e-43	2.8381	1	0.55	1.68291e-38
Mmd	5.69684e-32	2.80741	0.873	0.411	1.84885e-27
Lmod2	4.92802e-33	-3.07698	0.476	0.976	1.59934e-28
Fam171b	5.03901e-33	5.8116	0.159	0.008	1.63536e-28
Coq8a	5.31435e-33	-6.80279	0	0.875	1.72472e-28
Retreg1	5.31435e-33	-7.52103	0	0.875	1.72472e-28
Hmga2	6.20589e-33	7.1486	0.063	0.001	2.01406e-28
Bmp10	3.22277e-08	2.80435	0.524	0.326	0.00104592
Sox4	1.30384e-23	-1.80161	0.73	0.979	4.23148e-19
Ppp1r3b	1.0761e-29	2.76592	0.746	0.259	3.49237e-25
Trim5	1.70335e-32	5.30807	0.127	0.005	5.52805e-28
Rps27rt	2.34433e-22	2.69229	0.619	0.218	7.6083e-18
Rpl9	7.53778e-41	2.6567	1	0.879	2.44631e-36
Gm31659	1.3049e-31	-7.25602	0	0.855	4.23493e-27
Selenof	2.10809e-31	-6.56065	0	0.851	6.84158e-27
Kctd12	2.16784e-19	2.58242	0.603	0.221	7.0355e-15
Pnrc1	3.10507e-20	-1.75344	0.73	0.942	1.00772e-15
Atf3	5.89217e-31	-4.98563	0.143	0.89	1.91225e-26
Nppa	7.18184e-10	2.54517	0.762	0.645	2.33079e-05
Gadd45g	2.71089e-30	-3.90301	0.302	0.939	8.79792e-26
Unc5b	4.55724e-16	2.54267	0.54	0.202	1.47901e-11
Rps2	8.90082e-40	2.53487	1	0.627	2.88867e-35
Corin	1.92676e-24	2.52615	0.889	0.654	6.2531e-20
Hspb1	1.62264e-26	-1.65593	1	1	5.26611e-22
Rrad	2.4467e-16	-1.64666	0.841	0.976	7.94051e-12
Mcam	7.57341e-15	2.50196	0.508	0.19	2.45787e-10
Trir	9.59118e-30	-6.41897	0	0.826	3.11272e-25
Myh7	1.67105e-38	2.50002	1	0.982	5.42322e-34
Nipsnap2	1.51944e-29	-6.51971	0	0.823	4.93119e-25
Hpf1	1.80457e-29	-6.50899	0	0.822	5.85655e-25
Junb	2.72482e-29	-4.06761	0.143	0.888	8.84312e-25
Cox17	3.71281e-31	2.48411	0.905	0.472	1.20496e-26
Ndufaf8	3.01758e-29	-6.4064	0	0.819	9.79326e-25
Mest	4.6137e-17	2.3993	0.905	0.831	1.49733e-12
Tuba1b	1.34413e-21	2.37493	0.825	0.522	4.36225e-17
Snap91	9.88825e-20	2.33158	0.714	0.342	3.20913e-15
Grb10	1.63691e-32	2.29516	0.968	0.689	5.31242e-28
Rbm3	1.91462e-23	-1.53641	0.635	0.98	6.21369e-19
Nfkbia	1.12326e-28	-3.58951	0.302	0.909	3.64543e-24
Rnf145	7.15703e-15	2.26793	0.524	0.195	2.32274e-10
Cenpx	7.55985e-28	-6.30886	0	0.797	2.45347e-23
Tgm2	3.4306e-30	2.2665	0.952	0.667	1.11337e-25
Runx1t1	2.05115e-15	2.23535	0.524	0.191	6.65681e-11
Atcayos	4.38236e-17	-1.5326	0.683	0.957	1.42225e-12
Mrpl58	6.14472e-27	-6.21502	0	0.782	1.99421e-22
Col18a1	7.45216e-27	5.64756	0.079	0.002	2.41852e-22
Acadl	2.33535e-33	-1.48512	0.968	1	7.57914e-29
Tia1	1.53696e-17	2.19038	0.714	0.382	4.98806e-13
Dmac1	1.60943e-26	-6.20127	0	0.775	5.22323e-22
Mtch1	1.25341e-22	-1.46885	0.746	0.989	4.06781e-18
Rab12	3.34713e-17	-1.44315	0.524	0.92	1.08628e-12
Tceal9	2.66385e-26	-6.27331	0	0.771	8.64526e-22
Tuba1a	2.87469e-14	2.14722	0.714	0.427	9.32953e-10
Rpl30	1.89248e-39	-1.43444	1	1	6.14187e-35
Armcx2	2.27531e-12	2.11758	0.508	0.22	7.3843e-08
Mcrip1	5.7155e-26	-6.14765	0	0.766	1.85491e-21
F2r	7.53668e-12	2.09887	0.508	0.217	2.44595e-07
Mpc1	2.30218e-26	-1.41666	0.778	0.992	7.4715e-22
Gm10320	1.20966e-25	5.15927	0.127	0.007	3.92582e-21
Hif3a	1.62447e-25	3.08627	0.492	0.11	5.27204e-21
Larp6	1.7509e-25	7.30291	0.032	0	5.68236e-21
Phpt1	3.45987e-20	2.09815	0.778	0.411	1.12287e-15
Chsy1	2.76829e-11	2.04228	0.603	0.333	8.9842e-07
Cited2	6.132e-10	-1.38165	0.556	0.859	1.99008e-05
Mcrip2	3.78857e-25	-6.20586	0	0.752	1.22954e-20
Tpr	2.13448e-15	-1.35311	0.524	0.932	6.92724e-11
Ier3	1.13644e-24	-5.64907	0.063	0.772	3.68819e-20
Smim26	1.2835e-24	-6.02467	0	0.742	4.16546e-20
Pcp4l1	4.04173e-14	-1.33786	0.587	0.916	1.3117e-09
Ogt	5.21585e-17	2.03697	0.714	0.386	1.69275e-12
Socs2	2.26303e-24	-3.25295	0.111	0.842	7.34443e-20
Ube2m	6.3146e-16	-1.31184	0.556	0.938	2.04934e-11
Gbe1	1.14625e-11	2.00652	0.651	0.409	3.72005e-07
Rpl21	9.21829e-30	1.96267	0.968	0.827	2.9917e-25
Timm17a	7.84809e-20	-1.28781	0.698	0.973	2.54702e-15
Vps28	1.01349e-23	-5.96926	0	0.727	3.28918e-19
Zcrb1	2.974e-19	-1.27803	0.683	0.966	9.65181e-15
Ppp1r15a	1.48459e-23	-5.12145	0.032	0.741	4.8181e-19
Scd2	4.26437e-30	1.94879	1	0.781	1.38396e-25
Lrrc24	1.78602e-23	4.89343	0.111	0.006	5.79636e-19
Rps20	1.93879e-36	-1.27638	1	1	6.29215e-32
Fosb	2.11854e-23	-4.83923	0.032	0.747	6.87552e-19
Ifrd1	2.15664e-23	-3.31975	0.206	0.84	6.99918e-19
Hadh	1.81079e-18	-1.26117	0.667	0.972	5.87674e-14
Pam	8.68989e-19	1.94792	0.984	0.884	2.82022e-14
Mpc2	8.68419e-29	-1.25823	0.937	0.999	2.81837e-24
Ubc	6.8977e-19	-1.24218	0.857	0.991	2.23858e-14
Mlf1	8.76488e-26	-1.23676	0.905	0.998	2.84455e-21
Kcng2	5.51982e-19	-1.21879	0.762	0.975	1.7914e-14
Psmd4	2.1733e-13	-1.21315	0.524	0.935	7.05322e-09
Acadvl	1.59488e-15	-1.21097	0.571	0.941	5.17604e-11
Cacna2d2	2.06821e-25	1.94167	0.984	0.658	6.71216e-21
Ndrg4	1.69663e-23	1.93536	0.905	0.585	5.50625e-19
Naxe	2.85699e-22	-5.85197	0	0.7	9.27206e-18
Adprhl1	2.95467e-22	-1.20833	0.873	0.997	9.58909e-18
Oaz1	2.96315e-22	-0.580293	1	1	9.6166e-18
Grpel1	2.61135e-14	-1.2042	0.508	0.906	8.47488e-10
Sfrp1	2.25915e-08	1.91314	0.603	0.394	0.000733183
5930422O12Rik	1.01786e-21	5.67447	0.079	0.003	3.30336e-17
Cycs	1.47785e-34	1.89166	1	0.917	4.7962e-30
Gja5	5.89936e-20	1.87884	0.921	0.738	1.91458e-15
Spop	7.91469e-11	-1.20166	0.54	0.856	2.56863e-06
Sgcg	2.57891e-21	-2.16845	0.286	0.879	8.36958e-17
Pou6f2	3.28466e-21	6.01883	0.048	0.001	1.066e-16
Hypk	7.9343e-16	1.84615	0.762	0.452	2.575e-11
Fermt2	8.68369e-18	-1.19597	0.73	0.97	2.81821e-13
Klf9	9.67013e-21	-3.1999	0.127	0.776	3.13834e-16
Cirbp	3.56282e-14	-1.1803	0.603	0.962	1.15628e-09
S100a11	2.584e-10	1.8116	0.667	0.441	8.38611e-06
Tcap	1.32516e-20	-1.17008	0.952	0.998	4.30069e-16
Cd164	1.74335e-20	1.78884	0.857	0.511	5.65788e-16
Prelid3b	2.01846e-20	-5.69656	0	0.664	6.55071e-16
Agl	9.62893e-16	1.78234	0.841	0.636	3.12497e-11
Nrtn	6.57403e-12	-1.1633	0.556	0.897	2.13354e-07
Snx33	2.46143e-20	4.11209	0.175	0.017	7.98832e-16
Stard10	2.95977e-17	-1.16065	0.841	0.988	9.60565e-13
Hadha	9.53741e-17	-1.15701	0.746	0.98	3.09527e-12
Kif26b	6.52065e-11	1.75136	0.698	0.448	2.11621e-06
Coq7	2.75731e-14	-1.1552	0.54	0.935	8.94856e-10
Dkk3	4.19405e-20	3.96968	0.333	0.062	1.36114e-15
Calr	2.85905e-25	1.75099	1	0.791	9.27875e-21
Fxyd1	4.02537e-33	1.74145	1	0.993	1.30639e-28
Selenoh	7.01546e-20	-5.68842	0	0.653	2.2768e-15
Ppp1r14c	1.04135e-26	-1.14919	0.984	0.999	3.37959e-22
2900097C17Rik	7.98739e-20	-5.70436	0	0.652	2.59223e-15
Spon1	8.39478e-20	3.48427	0.302	0.051	2.72444e-15
Ctla2a	9.31789e-20	5.42766	0.063	0.002	3.02403e-15
Fkbp3	3.6645e-24	-1.14898	0.921	0.996	1.18928e-19
Snx21	1.95009e-09	1.74145	0.571	0.328	6.32882e-05
Ptgfrn	6.94962e-15	1.7206	0.714	0.394	2.25543e-10
RP24-174G2.4	1.02741e-19	8.00236	0.016	0	3.33437e-15
Gm15658	1.02741e-19	8.00236	0.016	0	3.33437e-15
Zfp935	1.02741e-19	7.83395	0.016	0	3.33437e-15
Gm43734	1.02741e-19	7.83395	0.016	0	3.33437e-15
Ccdc64	1.02741e-19	7.83395	0.016	0	3.33437e-15
Gm17249	1.02741e-19	7.83395	0.016	0	3.33437e-15
Lrrc48	1.02741e-19	7.78923	0.016	0	3.33437e-15
Pcdhga8.1	1.02741e-19	7.75552	0.016	0	3.33437e-15
Gm1818	1.02741e-19	7.74367	0.016	0	3.33437e-15
Slfn4	1.02741e-19	7.74225	0.016	0	3.33437e-15
Gm2788	1.02741e-19	7.74225	0.016	0	3.33437e-15
Selo	1.02741e-19	7.65063	0.016	0	3.33437e-15
AA474331	1.02741e-19	7.63619	0.016	0	3.33437e-15
Cryga	1.02741e-19	7.62372	0.016	0	3.33437e-15
C330013J21Rik	1.02741e-19	7.62372	0.016	0	3.33437e-15
Gm6086	1.02741e-19	7.61712	0.016	0	3.33437e-15
Dchs1	1.02741e-19	7.5486	0.016	0	3.33437e-15
Gm42691	1.02741e-19	7.5486	0.016	0	3.33437e-15
Lrrc16b	1.02741e-19	7.52755	0.016	0	3.33437e-15
D630033O11Rik	1.02741e-19	7.52568	0.016	0	3.33437e-15
Zfp607	1.02741e-19	7.52568	0.016	0	3.33437e-15
2500002B13Rik	1.02741e-19	7.52343	0.016	0	3.33437e-15
Mettl20	1.02741e-19	7.50444	0.016	0	3.33437e-15
Gm6594	1.02741e-19	7.49408	0.016	0	3.33437e-15
Pvrl1	1.02741e-19	7.49408	0.016	0	3.33437e-15
Gm26559	1.02741e-19	7.49408	0.016	0	3.33437e-15
Gm14420	1.02741e-19	7.49085	0.016	0	3.33437e-15
Gm12107	1.02741e-19	7.44316	0.016	0	3.33437e-15
Gm4890	1.02741e-19	7.44316	0.016	0	3.33437e-15
Gm28873	1.02741e-19	7.44316	0.016	0	3.33437e-15
C130074G19Rik	1.02741e-19	7.43823	0.016	0	3.33437e-15
Gm11008	1.02741e-19	7.43823	0.016	0	3.33437e-15
Gbp6.1	1.02741e-19	7.43823	0.016	0	3.33437e-15
Gm4944	1.02741e-19	7.43823	0.016	0	3.33437e-15
RP24-445D7.2	1.02741e-19	7.43343	0.016	0	3.33437e-15
Gm13157	1.02741e-19	7.43179	0.016	0	3.33437e-15
E230013L22Rik	1.02741e-19	7.43179	0.016	0	3.33437e-15
B3gnt7	1.02741e-19	7.4286	0.016	0	3.33437e-15
4930509E16Rik	1.02741e-19	7.4286	0.016	0	3.33437e-15
Cxx1c	1.02741e-19	7.4286	0.016	0	3.33437e-15
Gm4723	1.02741e-19	7.40517	0.016	0	3.33437e-15
Gm7808	1.02741e-19	7.40517	0.016	0	3.33437e-15
A230065H16Rik	1.02741e-19	7.40517	0.016	0	3.33437e-15
Rtn4rl2	1.02741e-19	7.4033	0.016	0	3.33437e-15
Mtap7d3	1.02741e-19	7.40013	0.016	0	3.33437e-15
Gm16793	1.02741e-19	7.40013	0.016	0	3.33437e-15
Cst12	1.02741e-19	7.39622	0.016	0	3.33437e-15
P2ry6	1.02741e-19	7.39622	0.016	0	3.33437e-15
1700049G17Rik	1.02741e-19	7.39622	0.016	0	3.33437e-15
Pcdh20	1.02741e-19	7.3863	0.016	0	3.33437e-15
Gm12942	1.02741e-19	7.37176	0.016	0	3.33437e-15
Gm15912	1.02741e-19	7.37176	0.016	0	3.33437e-15
Tmem180	1.02741e-19	7.37176	0.016	0	3.33437e-15
9830147E19Rik	1.02741e-19	7.34883	0.016	0	3.33437e-15
3110052M02Rik	1.02741e-19	7.34883	0.016	0	3.33437e-15
Kcna5	1.02741e-19	7.34222	0.016	0	3.33437e-15
Gm10699	1.02741e-19	7.34222	0.016	0	3.33437e-15
4930415F15Rik	1.02741e-19	7.34222	0.016	0	3.33437e-15
Vdac3-ps1	1.02741e-19	7.34222	0.016	0	3.33437e-15
Gm7221	1.02741e-19	7.32974	0.016	0	3.33437e-15
Rpl21-ps4	1.02741e-19	7.32974	0.016	0	3.33437e-15
1700112E06Rik	1.02741e-19	7.32974	0.016	0	3.33437e-15
Etohi1	1.02741e-19	7.32716	0.016	0	3.33437e-15
Dfna5	1.02741e-19	7.32716	0.016	0	3.33437e-15
Abcg3	1.02741e-19	7.31883	0.016	0	3.33437e-15
Gm8898	1.02741e-19	7.31883	0.016	0	3.33437e-15
Gm14306	1.02741e-19	7.28472	0.016	0	3.33437e-15
2310010G23Rik	1.02741e-19	7.28472	0.016	0	3.33437e-15
RP24-308M10.2	1.02741e-19	7.28472	0.016	0	3.33437e-15
1810014B01Rik	1.02741e-19	7.28472	0.016	0	3.33437e-15
Gm14267	1.02741e-19	7.28052	0.016	0	3.33437e-15
A130014A01Rik	1.02741e-19	7.28052	0.016	0	3.33437e-15
Gm8394	1.02741e-19	7.25479	0.016	0	3.33437e-15
Gm4473	1.02741e-19	7.25479	0.016	0	3.33437e-15
2210404O09Rik	1.02741e-19	7.25479	0.016	0	3.33437e-15
Hmga1-rs1	1.02741e-19	7.23431	0.016	0	3.33437e-15
6330403A02Rik	1.02741e-19	7.19213	0.016	0	3.33437e-15
1600002H07Rik	1.02741e-19	7.19213	0.016	0	3.33437e-15
RP23-78N8.4	1.02741e-19	7.14917	0.016	0	3.33437e-15
Mfsd7c	1.02741e-19	7.14917	0.016	0	3.33437e-15
Xrcc6bp1	1.02741e-19	7.11714	0.016	0	3.33437e-15
Gm22	1.02741e-19	7.11714	0.016	0	3.33437e-15
Gm18025	1.02741e-19	7.11714	0.016	0	3.33437e-15
Apol7a	1.02741e-19	6.96781	0.016	0	3.33437e-15
E130309D14Rik	1.02741e-19	6.96781	0.016	0	3.33437e-15
Mcl1	1.08262e-19	-2.41322	0.238	0.842	3.51354e-15
Eef1akmt1	1.58857e-19	-5.64559	0	0.646	5.15553e-15
Crk	7.19029e-13	1.70971	0.698	0.426	2.33354e-08
Snrpg	6.01326e-12	1.70233	0.683	0.44	1.95154e-07
Cavin1	2.33104e-19	-5.66818	0	0.642	7.56516e-15
Eci1	3.1542e-15	-1.14453	0.73	0.964	1.02366e-10
Map3k20	3.87285e-19	-5.6907	0	0.638	1.2569e-14
Fth1	1.3671e-36	-1.14088	1	1	4.43679e-32
Lsm12	4.88271e-19	-2.20653	0.238	0.832	1.58463e-14
Cyr61	5.15421e-19	-2.92391	0.111	0.737	1.67275e-14
Chrac1	5.22931e-12	-1.13014	0.508	0.91	1.69712e-07
Sh3glb1	5.66828e-19	-1.129	0.794	0.985	1.83958e-14
Fam177a	5.73152e-19	5.02917	0.095	0.005	1.86011e-14
Tubb4b	1.26903e-06	-1.12301	0.603	0.796	0.0411851
Sfrp5	7.69185e-19	4.35469	0.222	0.029	2.49631e-14
Ddx17	2.27394e-13	1.69708	0.714	0.433	7.37983e-09
Ntn1	8.78162e-19	3.74325	0.476	0.137	2.84999e-14
Naxd	9.32313e-19	-5.52192	0	0.629	3.02573e-14
Rps10	8.15962e-36	-1.11976	1	1	2.64812e-31
Ndufb9	9.83876e-19	-0.552856	1	1	3.19307e-14
Gprasp1	8.60407e-07	1.68749	0.508	0.317	0.0279237
Gm15543	7.07409e-14	1.67278	0.889	0.829	2.29583e-09
Hes1	1.37306e-18	-2.89456	0.127	0.746	4.45613e-14
Hopx	2.4585e-10	-1.11448	0.984	0.989	7.97881e-06
Tspo	2.17679e-18	-1.65237	0.476	0.917	7.06457e-14
Slc6a6	1.57579e-11	1.65505	0.794	0.656	5.11407e-07
Itgav	2.50756e-18	3.01009	0.492	0.15	8.13805e-14
Epha4	4.31823e-12	1.65482	0.778	0.514	1.40144e-07
Eno2	4.02748e-18	3.38394	0.333	0.068	1.30708e-13
Etfrf1	4.1667e-18	-5.54114	0	0.615	1.35226e-13
Ier2	4.89248e-18	-2.70979	0.206	0.777	1.58781e-13
Cox7c	5.14008e-18	-0.467874	1	1	1.66816e-13
Ppp1r14b	8.03503e-18	-1.57166	0.476	0.925	2.60769e-13
Zfand5	1.48232e-13	-1.10529	0.746	0.965	4.81071e-09
Ldb3	6.01566e-29	1.62275	1	0.865	1.95232e-24
Got1	7.83138e-12	-1.08845	0.54	0.917	2.5416e-07
Thap12	1.5017e-17	-5.48174	0	0.603	4.87363e-13
Arf3	1.04837e-06	1.60158	0.508	0.316	0.0340239
Rpl37a	1.54141e-17	0.528023	1	1	5.00249e-13
Kcne1	8.00288e-09	-1.08207	0.508	0.868	0.000259726
Gad1	1.9707e-17	5.31828	0.063	0.002	6.3957e-13
Hdlbp	6.36982e-11	-1.07837	0.587	0.909	2.06726e-06
Rpl26	8.0114e-30	-1.07257	1	1	2.60002e-25
Zfp91	8.05819e-10	-1.06726	0.556	0.854	2.61521e-05
Gm20594	3.56698e-17	-5.54107	0	0.595	1.15763e-12
Hikeshi	3.63725e-17	-5.37505	0	0.594	1.18043e-12
Hspa8	1.96741e-27	-1.06555	0.984	1	6.38504e-23
Rplp0	8.52726e-30	-1.0639	1	1	2.76744e-25
Ssh2	6.98316e-09	1.5812	0.603	0.38	0.000226631
Gem	4.83396e-17	-3.60045	0.063	0.664	1.56881e-12
Cdkn1c	1.29953e-14	1.57235	0.873	0.725	4.21748e-10
Nav2	2.25804e-16	1.55958	0.889	0.711	7.32826e-12
Arpc5l	3.79726e-09	-1.0507	0.508	0.858	0.000123236
Nbdy	8.68987e-17	-5.39	0	0.586	2.82021e-12
Tsc22d4	8.55773e-13	-1.04603	0.698	0.95	2.77733e-08
Rpl7a	1.49395e-21	1.55613	0.968	0.917	4.84846e-17
Ufc1	1.04012e-16	-1.39533	0.476	0.932	3.3756e-12
Xirp2	1.53138e-16	-2.48075	0.254	0.777	4.96994e-12
Socs3	1.64189e-16	-3.84494	0.063	0.642	5.32859e-12
Mef2d	8.01926e-12	1.54129	0.714	0.505	2.60257e-07
Mt1	4.6072e-07	-1.03746	0.587	0.873	0.0149522
Selenos	2.82187e-16	-5.38022	0	0.574	9.15809e-12
Ntm	1.31222e-09	-1.02614	0.635	0.915	4.25868e-05
Htra1	3.62145e-16	-1.64661	0.397	0.885	1.1753e-11
Selenot	3.95351e-16	-5.3107	0	0.57	1.28307e-11
Hsdl2	1.02337e-08	-1.02049	0.508	0.853	0.000332125
Bche	1.38099e-08	1.54091	0.54	0.312	0.000448186
Parm1	8.77155e-15	1.53988	0.841	0.619	2.84672e-10
Ptprf	9.74746e-07	1.52647	0.508	0.308	0.0316344
Arl1	6.89074e-09	-1.01095	0.508	0.841	0.000223632
H2afv	3.41174e-16	-1.00891	0.825	0.988	1.10724e-11
Cmya5	6.39731e-16	-2.03277	0.238	0.804	2.07618e-11
Celf2	8.38073e-16	1.5236	0.857	0.581	2.71988e-11
Peg3	5.21336e-08	1.52161	0.698	0.594	0.00169194
Sf3b1	1.24888e-09	-1.00629	0.587	0.905	4.05312e-05
Nectin2	9.44172e-16	-5.36305	0	0.561	3.06422e-11
mt-Nd3	8.75272e-36	1.52047	1	0.992	2.84061e-31
Impad1	3.55295e-07	1.50548	0.524	0.336	0.0115307
Txnip	1.69634e-09	-1.00024	0.857	0.954	5.5053e-05
Idh3b	1.15352e-10	-0.992158	0.587	0.922	3.74363e-06
Mif	4.716e-14	1.49307	0.921	0.831	1.53053e-09
Canx	2.11704e-20	1.49116	0.952	0.818	6.87065e-16
C130026L21Rik	1.37543e-15	6.58117	0.032	0.001	4.46381e-11
Lyz1	1.40901e-15	4.16793	0.222	0.035	4.57279e-11
4631405J19Rik	1.54682e-15	-5.39085	0	0.556	5.02005e-11
Glrx3	9.24536e-12	-0.985851	0.651	0.943	3.00049e-07
Dnajc15	4.24796e-09	-0.971435	0.603	0.879	0.000137863
Mrpl20	1.43071e-09	-0.970903	0.587	0.906	4.64322e-05
Hipk3	1.21287e-17	1.48471	0.873	0.676	3.93624e-13
Eif3c	1.6463e-15	-1.36324	0.46	0.922	5.34289e-11
Rgs10	1.7435e-15	4.01536	0.159	0.019	5.65837e-11
Brd1	2.04351e-15	-2.21671	0.19	0.751	6.63201e-11
Kctd10	4.5754e-07	1.48346	0.556	0.356	0.014849
Rps24	4.00655e-31	-0.967962	1	1	1.30029e-26
Psmd12	2.20663e-15	-1.45749	0.444	0.898	7.16139e-11
Acyp2	2.27771e-15	-1.54947	0.429	0.883	7.39209e-11
Art3	2.55609e-15	-1.75574	0.302	0.81	8.29552e-11
Nudc	2.70737e-15	-1.55622	0.333	0.872	8.78651e-11
Txnl1	2.04712e-10	-0.964634	0.603	0.917	6.64373e-06
Malat1	8.63545e-21	-0.962988	1	1	2.80255e-16
Mpped2	8.59879e-14	-0.962501	0.905	0.994	2.79065e-09
Gm10093	5.78625e-15	4.34932	0.127	0.012	1.87787e-10
Egr1	5.79246e-15	-2.27935	0.143	0.701	1.87989e-10
Mrpl18	8.60033e-14	-0.952302	0.778	0.972	2.79115e-09
Atp5k	2.65732e-33	1.48241	1	0.989	8.62408e-29
Kxd1	7.06304e-15	-1.4085	0.413	0.891	2.29224e-10
Ndufaf5	2.21155e-07	1.48097	0.587	0.411	0.00717737
March6	3.28858e-07	1.46866	0.587	0.425	0.0106728
Pgam1	4.65308e-21	1.46784	0.968	0.884	1.51011e-16
Tmed7	1.14257e-12	1.46143	0.762	0.566	3.70809e-08
Lmntd1	9.24663e-15	-5.57349	0	0.537	3.0009e-10
mt-Nd5	1.82062e-22	-0.948846	1	1	5.90863e-18
Ppp1r14a	9.80147e-15	4.10448	0.127	0.013	3.18097e-10
Mettl26	1.12136e-14	-5.1467	0	0.535	3.63926e-10
Rtf2	1.12136e-14	-5.17903	0	0.535	3.63926e-10
Crip2	1.25194e-14	-0.488347	1	1	4.06303e-10
Capza1	3.72585e-07	1.46072	0.571	0.398	0.0120919
Ctgf	1.76567e-14	-3.0294	0.127	0.653	5.73031e-10
Atf7ip	1.42735e-08	1.45907	0.619	0.421	0.000463231
Mtdh	1.64247e-08	-0.944317	0.524	0.883	0.000533049
Kmt5a	2.36632e-14	-5.18128	0	0.527	7.67964e-10
Dctn2	6.25769e-08	-0.931078	0.571	0.867	0.00203087
Tmem126a	3.51084e-08	-0.919623	0.571	0.862	0.00113941
Rps29	1.46139e-40	1.45258	1	0.999	4.74279e-36
Klf4	2.90175e-14	-3.6697	0.079	0.603	9.41735e-10
Grb14	3.06807e-14	-2.19262	0.206	0.734	9.95712e-10
Alox5	3.11913e-14	5.07502	0.048	0.002	1.01228e-09
Dnaja2	9.76906e-11	-0.919052	0.73	0.925	3.17045e-06
Crip3	4.02101e-14	5.10911	0.063	0.003	1.30498e-09
R3hdm2	3.3379e-08	-0.91612	0.508	0.854	0.00108328
Pcgf2	4.09552e-14	2.42987	0.46	0.16	1.32916e-09
Hnrnph1	2.98094e-07	1.43934	0.619	0.452	0.00967434
Btg2	4.65966e-14	-2.10557	0.254	0.767	1.51225e-09
Serinc3	3.49526e-18	1.42351	0.905	0.708	1.13435e-13
Cebpd	4.77262e-14	-6.24877	0	0.519	1.54891e-09
Uchl1	4.82003e-14	-1.73725	0.333	0.813	1.56429e-09
Ucp2	5.35938e-14	-2.01046	0.286	0.775	1.73933e-09
Chrng	5.81923e-14	4.40961	0.127	0.013	1.88857e-09
Idh2	5.99598e-14	-0.549144	1	1	1.94593e-09
Utp11	6.15356e-14	-5.08751	0	0.516	1.99708e-09
1810022K09Rik	6.81359e-14	-1.55957	0.365	0.838	2.21128e-09
Rplp1	3.29219e-36	1.41521	1	0.995	1.06845e-31
4933415A04Rik	7.8593e-14	4.43752	0.095	0.008	2.55066e-09
Denr	1.29953e-06	-0.900103	0.524	0.816	0.042175
Cox6a1	8.43372e-26	1.41355	1	0.961	2.73708e-21
Drap1	1.05495e-12	-0.899532	0.683	0.959	3.42375e-08
Ezr	1.60413e-11	-0.897417	0.778	0.981	5.20605e-07
mt-Nd2	9.93174e-14	-0.483068	1	1	3.22325e-09
1190002N15Rik	2.55335e-07	1.41144	0.683	0.553	0.00828665
Jpt1	1.1076e-13	-5.26624	0	0.509	3.59462e-09
Igf2r	1.21729e-18	1.40721	0.968	0.845	3.95058e-14
Eci2	1.23096e-13	-1.30927	0.476	0.899	3.99496e-09
Ndufa4	1.23549e-13	-0.420778	1	1	4.00967e-09
Sh3bp1	1.24173e-13	3.16897	0.238	0.046	4.02991e-09
Arhgap31	1.50852e-09	1.40204	0.698	0.452	4.89574e-05
Dek	9.79052e-07	-0.895324	0.508	0.82	0.0317742
Nop53	1.59668e-13	-5.02469	0	0.505	5.18187e-09
mt-Nd1	1.26504e-38	1.39016	1	1	4.10556e-34
Atp5f1	1.67059e-13	-0.535313	1	1	5.42172e-09
Sulf2	1.03492e-16	1.38819	0.952	0.878	3.35874e-12
Wdr74	2.06992e-13	4.17202	0.111	0.011	6.71773e-09
Dyrk2	2.14167e-13	-3.32148	0.063	0.566	6.95059e-09
Trip12	9.48513e-09	1.37158	0.667	0.479	0.00030783
Tmem14c	3.254e-09	-0.891123	0.619	0.92	0.000105605
Laptm4b	9.04296e-07	1.37146	0.619	0.485	0.029348
Igf1r	1.84943e-10	1.36844	0.683	0.423	6.00215e-06
Gm17018	2.93471e-13	-4.98133	0	0.498	9.52431e-09
Ftl1	4.33229e-29	1.35634	1	0.977	1.406e-24
Smdt1	3.02212e-13	-0.570724	1	0.999	9.80799e-09
Tspan7	3.07024e-13	2.55931	0.444	0.155	9.96416e-09
Atp5g2	3.16569e-13	-0.507121	1	1	1.02739e-08
Erbin	3.18436e-13	-5.11296	0	0.497	1.03345e-08
Cav1	3.42137e-13	5.46146	0.048	0.002	1.11037e-08
Hnrnpa0	4.11181e-09	-0.888773	0.667	0.911	0.000133445
Atp5h	3.5469e-13	-0.390582	1	1	1.15111e-08
Cnih1	3.1515e-11	1.35586	0.794	0.617	1.02279e-06
Zmynd10	4.20286e-13	6.5945	0.032	0.001	1.364e-08
Rps3a1	4.40727e-13	-0.456879	1	1	1.43034e-08
Cited1	1.30164e-13	1.35447	0.952	0.953	4.22435e-09
Ddx50	4.65169e-13	-1.71756	0.317	0.789	1.50966e-08
Axl	4.84042e-13	3.62441	0.159	0.022	1.57091e-08
Cntn2	4.8826e-13	-3.48375	0.048	0.551	1.5846e-08
Maip1	5.26566e-13	-4.97651	0	0.491	1.70892e-08
Gnb5	5.35129e-13	-5.01662	0	0.491	1.73671e-08
Pfn1	1.11169e-26	1.3463	0.984	0.944	3.60786e-22
Inppl1	2.65748e-07	1.34263	0.603	0.432	0.00862458
Irf1	6.59647e-13	-5.63402	0	0.488	2.14082e-08
Dpysl2	4.83759e-08	1.3418	0.73	0.649	0.00156999
Rock2	4.93476e-09	-0.886248	0.556	0.874	0.000160153
Fdps	8.5607e-13	-2.11397	0.254	0.725	2.77829e-08
Pim3	8.6606e-13	-2.32521	0.27	0.704	2.81071e-08
Gkap1	9.62274e-13	-2.56646	0.095	0.608	3.12296e-08
Ndufv1	2.01526e-14	-0.885873	0.873	0.994	6.54032e-10
Ptk2b	1.05806e-12	3.39045	0.19	0.032	3.43382e-08
Atp5c1	1.10372e-12	-0.435659	1	1	3.582e-08
Lman2	2.14104e-07	1.33242	0.54	0.346	0.00694854
Dynlt1c	1.28145e-12	4.13052	0.095	0.008	4.15881e-08
Eef1b2	5.49318e-16	-0.883675	0.905	0.992	1.78276e-11
Nid1	1.53254e-12	3.67225	0.159	0.023	4.97369e-08
Cpe	3.88282e-08	1.3137	0.762	0.627	0.00126013
Mosmo	1.65795e-12	-4.91105	0	0.477	5.38072e-08
Itm2a	4.76446e-09	1.31353	0.714	0.536	0.000154626
Selenop	1.8799e-12	-5.00482	0	0.475	6.10102e-08
Nsmce3	2.06516e-12	-4.90164	0	0.474	6.70228e-08
Tardbp	8.24801e-09	1.3113	0.651	0.437	0.000267681
Fbn2	4.25243e-14	1.30981	0.873	0.773	1.38008e-09
Csnk2a2	2.58058e-12	-2.34604	0.095	0.605	8.37503e-08
Idi1	2.80437e-12	-2.31319	0.159	0.654	9.10132e-08
Rala	2.83783e-12	-1.3252	0.429	0.855	9.20991e-08
Cd34	3.07344e-12	4.92381	0.048	0.002	9.97454e-08
H3f3b	8.68403e-16	-0.88323	0.921	0.996	2.81832e-11
Celf1	7.32132e-11	1.30878	0.778	0.636	2.37606e-06
Mia2	3.29418e-12	-4.92492	0	0.469	1.06909e-07
Phlda1	3.47146e-12	-1.49419	0.365	0.812	1.12663e-07
Glipr2	3.63107e-12	4.53641	0.079	0.006	1.17843e-07
Hmgb3	3.86177e-08	-0.876983	0.619	0.874	0.0012533
Hmgn3	3.70606e-09	1.30594	0.73	0.6	0.000120277
Gm11808	4.76148e-07	1.30361	0.571	0.383	0.0154529
Vamp2	1.93586e-07	1.30177	0.619	0.435	0.00628264
Aes	1.45665e-17	-0.875005	0.889	0.997	4.72741e-13
Pafah1b1	1.4215e-12	-0.874408	0.794	0.973	4.61333e-08
BC034090	5.79721e-12	2.44055	0.397	0.132	1.88143e-07
Nsg2	6.92058e-07	1.28984	0.698	0.553	0.02246
Cyp51	6.20584e-12	-2.73787	0.079	0.565	2.01404e-07
Klf6	6.49539e-12	-2.53518	0.159	0.623	2.10802e-07
Chd4	3.20612e-07	-0.869608	0.556	0.834	0.0104051
Vdac1	7.2611e-12	-0.540446	0.984	0.998	2.35652e-07
Arl8b	2.47202e-07	1.28602	0.587	0.405	0.00802268
Furin	1.44522e-08	1.28434	0.683	0.47	0.000469033
Phb	7.10865e-07	-0.869151	0.524	0.853	0.0230704
Commd3	1.57635e-10	-0.867926	0.73	0.942	5.11587e-06
Bod1	8.00092e-12	-1.40775	0.286	0.794	2.59662e-07
Pea15a	3.03458e-08	1.28216	0.651	0.445	0.000984843
Afdn	8.90757e-12	-4.87717	0	0.456	2.89086e-07
Klf2	9.11358e-12	-2.73623	0.159	0.618	2.95772e-07
Vdac3	1.61916e-15	-0.866333	0.841	0.995	5.25483e-11
Bcam	1.30737e-18	1.27859	0.984	0.849	4.24292e-14
Rtl8a	1.16851e-11	-4.84402	0	0.453	3.79228e-07
Mesd	1.27866e-11	-4.80434	0	0.451	4.14976e-07
1810058I24Rik	3.07771e-15	-0.862999	0.921	0.994	9.98841e-11
Nlgn3	1.5256e-11	3.60065	0.127	0.016	4.95117e-07
Hist1h2bc	1.56544e-11	-1.34971	0.429	0.867	5.08047e-07
Ttc14	1.21816e-06	1.27499	0.54	0.338	0.039534
Pink1	1.2426e-08	-0.855034	0.635	0.924	0.000403274
Pim1	1.6499e-11	-2.82754	0.127	0.579	5.35458e-07
Mlycd	1.7032e-11	-1.71722	0.19	0.696	5.52755e-07
Pgp	1.70531e-11	-1.28764	0.444	0.849	5.53442e-07
Snhg12	1.70574e-11	-2.47041	0.111	0.589	5.5358e-07
Ptpa	1.91326e-11	-4.80815	0	0.446	6.20929e-07
Zim1	1.92188e-11	4.10362	0.111	0.013	6.23727e-07
Cox4i2	2.0289e-11	4.17348	0.143	0.021	6.58459e-07
Plk2	2.20539e-11	-2.4201	0.127	0.6	7.15739e-07
Gja3	2.25856e-11	-2.2584	0.111	0.597	7.32992e-07
Ssc5d	2.29006e-11	4.54858	0.063	0.004	7.43216e-07
Ptma	1.00272e-15	-0.849855	0.984	0.999	3.25424e-11
Exoc3	2.6211e-11	-1.73392	0.19	0.68	8.50652e-07
Cacybp	2.67223e-11	-1.20365	0.476	0.869	8.67246e-07
Ece2	2.67272e-11	5.51925	0.032	0.001	8.67405e-07
Rab21	2.74355e-11	-1.54481	0.27	0.741	8.90393e-07
P4hb	2.85868e-07	1.26674	0.651	0.502	0.00927756
Rab11a	3.56285e-10	1.26457	0.746	0.583	1.15629e-05
Trim11	6.77919e-08	1.26162	0.683	0.483	0.00220012
mt-Nd6	3.01596e-11	-1.98558	0.286	0.719	9.78798e-07
Qprt	3.10386e-11	4.34336	0.079	0.007	1.00733e-06
Tnni1	5.10548e-30	1.2497	1	0.998	1.65693e-25
Morf4l2	1.65601e-13	1.24504	0.841	0.619	5.3744e-09
Lamtor3	3.60515e-11	-2.74916	0.063	0.526	1.17002e-06
Cox6c	3.80176e-11	-0.337119	1	1	1.23382e-06
Lnpep	4.44709e-11	-2.01354	0.143	0.622	1.44326e-06
Yap1	3.4643e-10	1.24102	0.73	0.496	1.1243e-05
Rps6ka3	3.116e-07	1.24017	0.603	0.396	0.0101127
H2afy	4.91799e-11	-1.37186	0.302	0.764	1.59608e-06
Cabcoco1	5.04148e-11	-4.76331	0	0.434	1.63616e-06
Ufd1	5.34248e-11	-4.6796	0	0.433	1.73385e-06
Hnrnpa3	1.95732e-14	1.23631	0.889	0.8	6.35229e-10
Vcp	3.18769e-09	-0.84779	0.651	0.943	0.000103453
Synpo2l	5.77373e-13	1.23326	0.889	0.73	1.87381e-08
Taf10	7.08249e-11	-1.24608	0.397	0.838	2.29855e-06
Tpt1	7.27406e-11	-0.392816	1	1	2.36072e-06
Erh	1.0949e-10	1.23277	0.81	0.672	3.55338e-06
Tomm22	7.68548e-09	-0.845614	0.603	0.914	0.000249425
Map1lc3a	2.27254e-20	-0.844966	0.968	0.999	7.37531e-16
Mrps7	8.35968e-11	-1.17437	0.429	0.844	2.71305e-06
Cop1	8.59307e-11	-4.67718	0	0.426	2.7888e-06
Lsm7	8.6588e-11	-1.61474	0.254	0.712	2.81013e-06
Il2	9.08783e-11	5.09138	0.048	0.002	2.94937e-06
Rab1a	1.88608e-07	1.22883	0.714	0.662	0.00612108
Pfdn1	5.38313e-12	-0.844839	0.825	0.975	1.74704e-07
Tax1bp1	5.19339e-07	-0.842921	0.587	0.878	0.0168546
Ski	1.4762e-07	1.22322	0.667	0.487	0.00479085
Bri3	2.92137e-20	-0.841139	0.984	0.999	9.48103e-16
Filip1	1.24826e-10	-1.82416	0.254	0.689	4.05111e-06
Csrnp1	1.30302e-10	-3.56502	0.032	0.464	4.22883e-06
Tsfm	1.34947e-10	-1.85254	0.175	0.648	4.37959e-06
Eif1b	3.20384e-07	-0.836892	0.603	0.897	0.0103977
Arxes2	1.40449e-10	2.84165	0.27	0.071	4.55813e-06
Usp15	1.42163e-10	-2.07654	0.111	0.58	4.61376e-06
Tpm3-rs7	1.50192e-10	4.42634	0.063	0.005	4.87432e-06
Rpl5	1.96969e-17	-0.83236	0.984	0.998	6.39245e-13
BC005537	2.29239e-07	1.21826	0.683	0.527	0.00743973
Fry	1.42361e-09	1.2149	0.81	0.662	4.62018e-05
Mocs2	1.6882e-10	-1.64224	0.254	0.705	5.47888e-06
Acbd6	1.74225e-10	-1.57202	0.238	0.722	5.65429e-06
Ndufab1	1.75264e-10	-0.439566	1	0.999	5.68801e-06
Rpl35	2.42699e-22	1.20508	1	0.936	7.87655e-18
Ybx1	4.38258e-26	-0.828728	0.984	1	1.42232e-21
Taf7	1.83874e-10	-2.03169	0.143	0.609	5.96746e-06
Khdrbs3	1.84267e-10	-1.38237	0.381	0.807	5.9802e-06
Kif13a	1.79104e-13	1.19866	0.873	0.707	5.81263e-09
Mgll	1.99635e-10	-1.66764	0.317	0.73	6.47894e-06
Bcl7c	2.04539e-10	-1.68635	0.222	0.687	6.63812e-06
Slc25a3	9.60932e-23	-0.822133	0.984	1	3.11861e-18
Ldhb	2.08609e-10	-0.553801	0.984	1	6.7702e-06
Psma3	1.38985e-11	-0.821508	0.794	0.973	4.51061e-07
Ndufb10	2.1117e-10	-0.573327	0.952	1	6.85331e-06
Nr0b1	2.1699e-10	7.08285	0.016	0	7.0422e-06
Zcchc13	2.1699e-10	7.06876	0.016	0	7.0422e-06
1810064F22Rik	2.1699e-10	7.05546	0.016	0	7.0422e-06
Mmp2	2.1699e-10	6.91687	0.016	0	7.0422e-06
Gm5128	2.1699e-10	6.86146	0.016	0	7.0422e-06
1810049J17Rik	2.1699e-10	6.81094	0.016	0	7.0422e-06
Tmem169	2.1699e-10	6.79842	0.016	0	7.0422e-06
Cnrip1	2.1699e-10	6.78038	0.016	0	7.0422e-06
Pcdhb6	2.1699e-10	6.77441	0.016	0	7.0422e-06
Hist1h2ag	2.1699e-10	6.64433	0.016	0	7.0422e-06
Sema5b	2.1699e-10	6.59937	0.016	0	7.0422e-06
F9	2.1699e-10	6.55715	0.016	0	7.0422e-06
Fam69c	2.1699e-10	6.54982	0.016	0	7.0422e-06
Plekhg6	2.1699e-10	6.53402	0.016	0	7.0422e-06
Lipf	2.1699e-10	6.51194	0.016	0	7.0422e-06
Lrp8os2	2.1699e-10	6.50203	0.016	0	7.0422e-06
Rrh	2.1699e-10	6.39631	0.016	0	7.0422e-06
Entpd1	2.20501e-10	6.33867	0.016	0	7.15615e-06
Gpr156	2.20501e-10	6.20904	0.016	0	7.15615e-06
Ndufa1	2.29976e-10	-0.482347	0.984	0.999	7.46363e-06
Timm8a1	2.31209e-10	-4.61292	0	0.413	7.50365e-06
Washc3	2.34459e-10	-4.59392	0	0.413	7.60914e-06
Map1lc3b	3.72248e-17	-0.821442	0.952	0.997	1.20809e-12
Gyg	5.16722e-17	1.18916	0.968	0.923	1.67697e-12
Flnc	1.86878e-07	1.17455	0.698	0.549	0.00606495
Fitm1	3.23601e-09	-0.820562	0.841	0.973	0.000105022
Acsl1	2.68901e-10	-1.29435	0.349	0.794	8.72691e-06
Gstp1	2.92365e-10	-1.72038	0.19	0.658	9.48843e-06
Usp9x	2.10426e-07	1.16763	0.683	0.537	0.00682916
Prkcb	3.0671e-10	4.13783	0.095	0.011	9.95395e-06
Kcmf1	3.3773e-10	-1.28398	0.349	0.792	1.09607e-05
Pet100	1.1296e-07	1.16208	0.698	0.537	0.00366602
Klhdc3	2.85088e-07	1.15549	0.683	0.505	0.00925224
Nono	2.99473e-10	1.14741	0.81	0.633	9.71911e-06
Gm6133	3.57739e-10	4.27177	0.079	0.007	1.16101e-05
Ccnl1	3.57893e-10	-1.79995	0.19	0.632	1.16151e-05
Rps19	3.57981e-10	0.522582	0.984	0.998	1.16179e-05
Nrsn2	3.71478e-10	5.50602	0.048	0.003	1.20559e-05
Rpl8	3.71748e-10	-0.433736	1	1	1.20647e-05
Nudt2	3.76933e-10	-2.07632	0.127	0.574	1.2233e-05
Ddrgk1	3.8768e-10	-1.24138	0.333	0.781	1.25818e-05
Pdgfa	4.57808e-08	-0.815931	0.651	0.894	0.00148577
Ndufb4	4.32061e-10	-0.447772	0.984	1	1.40221e-05
Gm34030	4.6188e-10	-4.68967	0	0.403	1.49899e-05
Dynll1	6.76842e-22	1.12605	1	0.974	2.19662e-17
Btbd7	4.9253e-10	-2.53846	0.063	0.499	1.59846e-05
Ndufa3	5.56198e-26	1.12536	1	0.98	1.80508e-21
Fat3	5.52199e-10	5.90865	0.032	0.001	1.79211e-05
Slc22a7	5.52199e-10	5.87554	0.032	0.001	1.79211e-05
Rps15	5.64016e-10	0.49088	1	0.998	1.83046e-05
Rnd3	5.6484e-10	-2.76113	0.079	0.5	1.83313e-05
Bcar3	5.65366e-10	5.63902	0.032	0.001	1.83484e-05
Mkks	5.71126e-10	2.38025	0.444	0.195	1.85353e-05
Limch1	5.72814e-10	-1.52133	0.222	0.683	1.85901e-05
Cops6	4.23613e-08	-0.812162	0.587	0.912	0.00137479
Nfu1	6.18546e-10	-1.20794	0.413	0.832	2.00743e-05
Acot1	6.27757e-10	-3.49718	0.032	0.44	2.03732e-05
Slc19a2	6.543e-10	4.10246	0.095	0.011	2.12347e-05
Pdgfc	6.89523e-10	3.06766	0.175	0.034	2.23778e-05
Mir670hg	7.14609e-10	-4.65319	0	0.397	2.31919e-05
Gnb1	6.34579e-13	1.12145	0.873	0.648	2.05946e-08
Gnas	7.1894e-10	-0.451333	1	1	2.33325e-05
Pgf	7.37476e-10	4.68394	0.063	0.005	2.3934e-05
AW551984	7.96587e-10	2.66699	0.222	0.052	2.58524e-05
Nol7	1.96438e-08	-0.811679	0.667	0.927	0.00063752
Sar1b	5.39748e-08	-0.809086	0.571	0.878	0.0017517
Fuca2	8.59306e-10	-1.61171	0.317	0.723	2.78879e-05
Ddx24	9.03263e-10	-1.02304	0.413	0.829	2.93145e-05
Tceal8	1.78135e-10	1.11536	0.841	0.684	5.78121e-06
Podxl2	1.01701e-09	-1.34292	0.19	0.664	3.30061e-05
Psma4	7.19067e-08	-0.80814	0.619	0.923	0.00233366
Bsg	1.08925e-09	-0.575382	0.968	0.999	3.53506e-05
Elovl5	1.09641e-09	2.26093	0.46	0.215	3.55829e-05
Ddit3	1.2237e-09	-2.0645	0.206	0.622	3.97138e-05
Lrrfip1	6.90612e-07	-0.808041	0.524	0.86	0.0224131
Gna11	1.27306e-09	-1.47841	0.27	0.709	4.13158e-05
Vdac2	4.24689e-19	-0.804071	0.968	0.998	1.37829e-14
Msl3l2	1.3549e-09	5.05611	0.048	0.003	4.39719e-05
Zfp433	1.36186e-09	4.87419	0.048	0.003	4.41979e-05
Lrrc23	1.38297e-09	4.62995	0.048	0.003	4.48829e-05
Fkbp5	1.40416e-09	3.68923	0.127	0.02	4.55705e-05
Radil	1.40439e-09	4.67692	0.048	0.003	4.55782e-05
Mlf2	3.17973e-12	1.1099	0.921	0.834	1.03195e-07
Cdv3	7.01887e-07	-0.800946	0.667	0.877	0.022779
Ankrd11	1.47114e-09	-1.22312	0.381	0.795	4.77443e-05
Rras	1.49883e-09	-1.48686	0.222	0.687	4.86431e-05
Rpl36a	9.95423e-20	1.10298	1	0.98	3.23055e-15
Cmss1	1.52866e-09	-2.60901	0.048	0.466	4.96112e-05
Rrbp1	1.01037e-06	-0.786676	0.556	0.859	0.0327906
C530008M17Rik	1.83445e-09	3.19412	0.143	0.024	5.95351e-05
Acp1	1.88524e-09	-1.18762	0.413	0.81	6.11836e-05
Eif4a2	4.7053e-16	1.09695	0.952	0.819	1.52706e-11
Cox6a2	2.07069e-09	-0.411263	1	1	6.72021e-05
Arid5b	2.20818e-09	-2.2271	0.159	0.576	7.16642e-05
Tcea3	2.25712e-09	-1.32339	0.381	0.762	7.32527e-05
Coq10b	2.27081e-09	-1.91873	0.127	0.557	7.36969e-05
Supt4a	2.36287e-09	-1.0413	0.492	0.873	7.66846e-05
Nr4a1	2.44897e-09	-2.27144	0.095	0.511	7.94789e-05
Zfp106	2.44904e-09	-1.03202	0.476	0.865	7.94811e-05
Hnrnpa1	5.08779e-10	1.09045	0.873	0.845	1.65119e-05
Nsd3	2.96724e-09	-4.46959	0	0.377	9.62987e-05
Rasl11b	3.07001e-09	-1.38256	0.365	0.776	9.9634e-05
Dusp1	3.0834e-09	-1.51465	0.302	0.701	0.000100069
Sertad1	3.15104e-09	-1.55475	0.206	0.65	0.000102264
Guk1	6.98363e-07	-0.783197	0.556	0.869	0.0226647
Rwdd1	3.22726e-09	-0.777889	0.651	0.932	0.000104738
Psmb2	8.58986e-10	-0.773692	0.73	0.975	2.78775e-05
Rbpms	2.32998e-11	-0.762038	0.873	0.986	7.56172e-07
Cox7b	9.74945e-15	-0.759491	1	1	3.16409e-10
Kmt5b	3.42442e-09	-4.4507	0	0.375	0.000111136
Nrp1	3.47584e-09	1.76233	0.492	0.247	0.000112805
Thsd4	3.52232e-09	2.49072	0.317	0.108	0.000114314
Vash2	3.6927e-09	2.16711	0.381	0.147	0.000119843
Aimp1	3.69317e-09	-1.08481	0.429	0.848	0.000119858
Serinc1	4.05968e-13	1.08638	0.921	0.849	1.31753e-08
Prdx2	4.08043e-20	-0.759436	1	0.999	1.32426e-15
Rpl23	3.8118e-09	-0.30315	1	1	0.000123708
Shisa4	3.81195e-09	-1.86915	0.175	0.592	0.000123713
Gm2000	3.92722e-09	2.59075	0.254	0.071	0.000127454
Chchd10	4.05162e-09	-0.407434	1	1	0.000131491
Abraxas2	4.05345e-09	-4.37739	0	0.372	0.000131551
Rab2a	1.80032e-10	-0.757833	0.81	0.976	5.84276e-06
Glrx5	2.41269e-08	-0.755183	0.698	0.938	0.000783014
Sin3b	7.78486e-07	-0.754061	0.54	0.866	0.025265
Ier5	4.47135e-09	-1.52203	0.349	0.739	0.000145113
Glrx2	4.47728e-09	-1.07004	0.476	0.844	0.000145306
Zfp30	4.50797e-09	-1.37463	0.254	0.691	0.000146302
Ctnnb1	1.14214e-13	1.08621	0.937	0.792	3.7067e-09
Dnmt3a	6.87747e-07	1.06713	0.698	0.56	0.0223202
Snrpb2	1.20886e-06	1.06517	0.651	0.492	0.0392324
Ccser2	3.28097e-09	-0.753094	0.762	0.964	0.000106481
Ndufa12	4.80318e-09	-0.429926	1	0.999	0.000155883
Psmb4	4.41867e-09	-0.752718	0.794	0.949	0.000143404
Calm1	7.95856e-12	-0.751007	0.968	0.991	2.58287e-07
Pebp1	5.19106e-09	-0.477795	1	0.999	0.000168471
Tdtomato	5.31395e-09	-4.63442	0	0.368	0.000172459
Rap1b	5.45515e-09	-1.4977	0.254	0.682	0.000177041
Hsp90ab1	1.49091e-22	-0.747958	1	1	4.83859e-18
Isoc1	5.83176e-09	-1.38028	0.222	0.66	0.000189264
Mrpl9	5.85414e-09	-1.70858	0.175	0.608	0.00018999
Hmgcs1	5.88492e-09	-1.54454	0.365	0.731	0.000190989
Ppp4r3a	5.96412e-09	-4.42887	0	0.366	0.000193559
Hint3	6.053e-09	-1.41171	0.238	0.679	0.000196444
Nfat5	9.03672e-07	1.0625	0.698	0.584	0.0293278
Dpep2	6.23846e-09	5.56912	0.032	0.001	0.000202463
Rpl31	3.00113e-29	1.05913	1	0.992	9.73988e-25
Arhgap10	6.65011e-09	-2.71979	0.048	0.439	0.000215823
Bag1	5.74922e-09	-0.745211	0.746	0.966	0.000186585
Prkcd	6.90667e-09	4.23906	0.079	0.009	0.000224149
Sorbs2	7.54817e-12	1.05634	0.921	0.793	2.44968e-07
Rpl18	9.63073e-20	-0.741656	1	1	3.12556e-15
Srpr	7.76941e-09	-1.25318	0.286	0.721	0.000252149
Pdpn	7.77035e-09	1.86877	0.492	0.243	0.000252179
Hagh	7.89959e-09	-1.07977	0.365	0.786	0.000256373
Rpl19	1.42292e-24	-0.732757	1	1	4.61795e-20
Smim27	8.20263e-09	-4.37925	0	0.362	0.000266208
Oaz2	1.90355e-08	1.05381	0.81	0.712	0.000617779
Ammecr1	8.51038e-09	2.22203	0.381	0.158	0.000276196
Sorbs1	8.59943e-09	-2.21253	0.063	0.452	0.000279086
Ergic1	8.60914e-09	1.91419	0.46	0.225	0.000279401
Cox7a2	9.0633e-09	-0.290937	1	1	0.00029414
Nkx2-5	7.2465e-15	1.05073	0.952	0.892	2.35178e-10
Cdc37l1	9.92728e-09	-1.50967	0.19	0.622	0.00032218
Dnajc19	1.01262e-08	-0.800108	0.476	0.858	0.000328635
Eno3	1.58675e-15	-0.727741	0.984	0.999	5.14962e-11
Plp2	1.06124e-08	2.12911	0.349	0.133	0.000344414
Osgepl1	1.15958e-08	-2.22011	0.095	0.489	0.000376329
Negr1	1.16107e-08	4.29709	0.063	0.006	0.000376814
Sap18	1.1626e-08	1.89674	0.476	0.248	0.00037731
Rps17	1.18184e-08	0.397898	1	0.999	0.000383554
Malt1	1.18938e-08	-2.56653	0.063	0.446	0.000386001
Paxx	1.19792e-08	-4.35665	0	0.356	0.000388772
Pbx1	1.52703e-06	1.04995	0.794	0.749	0.0495583
Rpsa	8.08666e-14	-0.721368	0.968	0.999	2.62445e-09
Macrod1	1.24643e-08	-1.1909	0.333	0.76	0.000404518
C1qtnf6	1.34649e-08	2.19847	0.365	0.147	0.000436988
Rel	1.37229e-08	-2.20851	0.127	0.516	0.000445362
Grn	1.6532e-07	1.04102	0.714	0.589	0.0053653
Ppp4r3b	1.4098e-08	-4.37201	0	0.353	0.000457535
Hmgb1	1.05724e-13	1.03715	0.921	0.764	3.43116e-09
Igfbp5	4.70279e-12	1.03198	0.968	0.888	1.52624e-07
Ppp1cc	6.42635e-09	1.02196	0.825	0.771	0.000208561
Tmem9b	1.4975e-08	1.78839	0.444	0.208	0.000486
Hras	1.64207e-08	-0.965034	0.476	0.842	0.000532917
Dctn3	5.1587e-09	-0.718378	0.762	0.968	0.00016742
Bex4	1.6704e-08	2.31407	0.254	0.074	0.000542112
Ppp1cb	2.78347e-11	1.00317	0.873	0.754	9.03347e-07
Rpl34	1.80993e-08	-0.345882	1	1	0.000587396
Cs	4.46363e-11	0.995912	0.952	0.806	1.44863e-06
Cct2	1.2347e-07	-0.718139	0.714	0.927	0.0040071
Apobec2	2.05526e-08	-0.56829	0.937	0.995	0.000667015
Cish	2.0932e-08	-1.79048	0.222	0.611	0.000679327
Aaed1	2.09834e-08	-4.28284	0	0.347	0.000680996
Slc16a3	2.12421e-08	2.61185	0.254	0.076	0.000689391
Anxa2	2.44841e-07	0.985127	0.81	0.726	0.00794605
Psmd8	9.58787e-08	-0.71751	0.651	0.948	0.00311165
Cuedc2	2.42898e-08	-1.14724	0.317	0.739	0.0007883
Nfil3	2.44963e-08	-2.4585	0.079	0.457	0.000795003
Gucy1a1	2.46312e-08	-4.50449	0	0.345	0.000799382
Csrp3	2.57041e-08	-0.533318	1	1	0.000834201
Ppp1r12a	2.57316e-08	-1.0774	0.365	0.77	0.000835092
Rps23	2.82675e-08	0.49549	1	1	0.000917394
Atad2b	2.82862e-08	-3.55029	0.016	0.367	0.000918
Bmp2	2.89915e-08	2.83542	0.381	0.156	0.00094089
C2cd5	2.97068e-08	2.85314	0.19	0.047	0.000964106
Hk1	4.73418e-09	0.981415	0.825	0.712	0.000153643
Psmc6	3.1987e-08	-1.00288	0.476	0.846	0.00103811
Rpl38	2.69648e-26	0.977443	1	0.996	8.75116e-22
Rpl13	4.81363e-24	-0.711624	1	1	1.56222e-19
Arf5	4.76918e-09	-0.711596	0.825	0.962	0.000154779
Nid2	3.34957e-08	3.13647	0.127	0.022	0.00108707
Ephb1	3.36782e-08	-2.73206	0.048	0.411	0.00109299
Slc25a4	3.76226e-25	-0.708859	1	1	1.221e-20
Cst3	7.68283e-11	-0.705677	1	1	2.49339e-06
Rps6	1.69754e-19	0.972438	1	0.988	5.50918e-15
Ldlrad4	3.96219e-08	-2.99758	0.032	0.387	0.00128589
Babam2	4.16355e-08	-4.22256	0	0.336	0.00135124
Pfdn5	6.79647e-15	-0.705406	0.968	0.999	2.20573e-10
Fh1	1.83689e-07	-0.703805	0.683	0.935	0.00596144
Lsr	4.25368e-08	5.43023	0.032	0.002	0.00138049
Htr1b	4.25368e-08	5.3214	0.032	0.002	0.00138049
Syt1	4.28034e-08	5.42192	0.032	0.002	0.00138914
Clip3	4.382e-08	3.64759	0.095	0.013	0.00142213
Gm47283	4.47714e-08	-4.36514	0	0.335	0.00145301
Cox5a	5.784e-23	-0.684323	1	1	1.87714e-18
Rtn4	1.2192e-07	-0.681862	0.81	0.966	0.00395678
Fkbp1a	9.35044e-11	0.971143	0.889	0.873	3.03459e-06
Ncoa4	4.93111e-08	-4.21159	0	0.334	0.00160034
Eef2	4.98044e-08	0.44893	0.984	0.992	0.00161635
E330017L17Rik	5.01561e-08	-3.30064	0.032	0.38	0.00162776
Tmem42	5.06098e-08	-1.78003	0.095	0.492	0.00164249
Clic4	3.55471e-10	0.968994	0.857	0.821	1.15364e-05
Ctnnbip1	5.35314e-08	-1.44118	0.254	0.646	0.00173731
Mrpl51	1.05916e-06	-0.68093	0.683	0.917	0.0343741
Smad7	5.54764e-08	-1.2485	0.317	0.717	0.00180043
Ermp1	5.60941e-08	2.51754	0.254	0.08	0.00182048
Mrpl43	5.75941e-08	-0.964714	0.492	0.848	0.00186916
Adra1b	5.78435e-08	-2.0509	0.079	0.455	0.00187725
Ttc12	6.1853e-08	-2.18919	0.079	0.452	0.00200738
1110065P20Rik	6.24143e-08	-1.09983	0.365	0.755	0.00202559
Suclg1	1.35247e-10	-0.679042	0.889	0.988	4.38932e-06
Gtsf1	6.28871e-08	3.01307	0.206	0.055	0.00204094
Tnni3	6.39899e-08	-0.331059	1	1	0.00207673
Bhlhe40	6.5629e-08	-2.08837	0.127	0.495	0.00212992
Thtpa	6.72309e-08	5.47994	0.048	0.004	0.00218191
Acvr1c	6.72309e-08	4.7541	0.048	0.004	0.00218191
Rtl8b	6.73671e-08	-4.19618	0	0.329	0.00218633
Rpl39	7.27478e-31	0.967602	1	1	2.36096e-26
Ckmt2	6.9421e-08	-1.945	0.175	0.544	0.00225299
Gm12166	6.9539e-08	3.85476	0.095	0.014	0.00225682
Sod2	3.51746e-13	-0.678608	0.952	0.999	1.14156e-08
Psmb5	2.67517e-10	-0.677776	0.857	0.989	8.68201e-06
Cdc42ep3	7.2224e-08	-1.22943	0.365	0.739	0.00234396
Eef1d	7.83409e-08	-0.576295	0.794	0.968	0.00254247
Fstl1	2.75319e-11	0.960261	0.937	0.88	8.93519e-07
Tpm2	8.50552e-08	2.32947	0.27	0.09	0.00276038
Ola1	8.78432e-08	-1.07548	0.349	0.747	0.00285086
Atp5g1	8.85629e-08	-0.378458	1	1	0.00287422
Dubr	8.86915e-08	2.49594	0.238	0.073	0.00287839
Cnn2	8.87594e-08	2.29084	0.302	0.11	0.0028806
Dcun1d1	9.13798e-08	1.87741	0.444	0.235	0.00296564
Bud23	9.39705e-08	-4.10791	0	0.323	0.00304972
Cmbl	9.45506e-08	-2.23488	0.079	0.437	0.00306854
Emc6	6.09629e-07	-0.675847	0.635	0.915	0.0197849
Asap1	9.8616e-08	-1.57494	0.111	0.481	0.00320048
Dbi	9.99442e-08	-0.447303	1	1	0.00324359
Bag3	1.00303e-07	-1.62845	0.175	0.557	0.00325525
Naca	1.03181e-07	-0.475881	0.968	0.997	0.00334863
Samm50	1.05092e-07	-0.836584	0.492	0.855	0.00341065
Nisch	6.0643e-09	0.958359	0.857	0.748	0.000196811
Rcn3	1.13723e-07	2.72893	0.238	0.073	0.00369076
Amotl2	1.16767e-07	-1.97565	0.095	0.457	0.00378955
Gm10602	1.21777e-07	-4.1842	0	0.319	0.00395215
Dnaja1	5.60043e-07	-0.674503	0.778	0.959	0.0181756
Nxf1	7.14896e-08	-0.670371	0.73	0.949	0.00232012
Erbb2	1.31493e-07	1.95807	0.381	0.172	0.00426747
Fau	5.45676e-22	-0.666774	1	1	1.77094e-17
Prkd3	1.33435e-07	2.27069	0.317	0.125	0.0043305
Smc3	1.33974e-07	-0.99411	0.317	0.705	0.00434798
Eif4ebp2	1.37119e-07	-2.40993	0.048	0.395	0.00445007
Irs2	1.38593e-07	-2.0496	0.159	0.507	0.00449791
Sec11c	1.39902e-07	-1.016	0.333	0.724	0.00454037
Srgap1	1.42131e-07	-1.19489	0.254	0.657	0.00461271
Cds1	1.45344e-07	5.04273	0.048	0.004	0.004717
Cbx6	4.49253e-07	0.951293	0.762	0.642	0.01458
Hdgfl2	1.4858e-07	-4.13407	0	0.316	0.00482201
Myadm	1.50939e-07	1.92841	0.492	0.295	0.00489858
Cdhr1	1.5364e-07	4.38503	0.048	0.004	0.00498623
Lbh	1.68548e-12	0.950138	0.952	0.939	5.47006e-08
Mettl23	1.62071e-07	-0.992052	0.349	0.763	0.00525986
Uhmk1	1.65166e-07	2.53817	0.222	0.066	0.0053603
Pafah1b2	8.22996e-08	0.949898	0.746	0.622	0.00267095
Edf1	1.67498e-07	-0.533054	0.905	0.987	0.00543599
Lars	1.69138e-07	-1.31363	0.238	0.636	0.00548921
Wnk1	2.95208e-13	0.942704	0.952	0.937	9.58069e-09
Lsm4	9.68481e-07	-0.665067	0.683	0.931	0.0314311
Cox7a1	4.86732e-10	0.906874	0.968	0.948	1.57964e-05
Rpl41	9.29633e-33	0.905929	1	1	3.01703e-28
Gnb2	1.89932e-07	-0.492282	0.857	0.978	0.00616407
Polr2e	1.92405e-07	-0.959321	0.349	0.764	0.00624432
Rac1	4.78709e-07	0.899743	0.81	0.74	0.015536
Mrpl55	1.96551e-07	-0.889965	0.381	0.779	0.00637886
Dnttip1	1.97061e-07	-1.25517	0.19	0.581	0.00639542
Dlk1	2.05432e-07	5.26457	0.032	0.002	0.00666709
Col6a2	2.08775e-07	2.28267	0.413	0.206	0.0067756
Alad	2.09099e-07	-1.30239	0.238	0.628	0.00678608
Rpl4	4.51504e-13	0.893777	0.921	0.963	1.46531e-08
Pygm	5.8001e-11	0.880429	0.921	0.857	1.88236e-06
Gabbr1	2.14742e-07	2.29893	0.27	0.095	0.00696925
Hnrnpa2b1	2.09647e-12	0.86055	0.984	0.931	6.80389e-08
Cebpzos	2.22121e-07	-1.02837	0.413	0.765	0.00720872
Capn6	2.24569e-07	2.44103	0.254	0.084	0.00728815
Gon7	2.2815e-07	-4.06254	0	0.309	0.00740438
Hspb7	9.68357e-16	0.853083	0.984	0.981	3.14271e-11
Mtus1	1.54171e-07	0.849415	0.841	0.794	0.00500346
Glod4	2.35845e-07	-1.27655	0.254	0.668	0.00765411
Cxcl1	2.38898e-07	-5.41346	0	0.308	0.0077532
Ppp1r1a	1.04573e-06	0.844184	0.873	0.806	0.0339382
Rpl28	1.4605e-20	-0.664945	1	1	4.7399e-16
Smpx	1.66648e-10	0.84334	0.984	0.993	5.4084e-06
Pmpcb	2.47892e-07	-0.916884	0.492	0.844	0.0080451
Tsc22d3	2.64955e-10	0.842592	0.984	0.978	8.59885e-06
B2m	2.56861e-07	2.12633	0.397	0.192	0.00833617
Rplp2	6.74947e-20	0.841998	0.984	0.998	2.19047e-15
Gria2	2.65581e-07	3.17033	0.222	0.067	0.00861916
mt-Atp6	7.17774e-29	0.84076	1	1	2.32946e-24
Tpbg	2.71439e-07	3.01449	0.143	0.031	0.00880927
Ndufb11	2.74567e-07	-0.424852	0.968	1	0.00891079
Chpt1	2.82876e-07	-0.907078	0.46	0.796	0.00918045
Ak1	3.54397e-11	0.811154	0.968	0.91	1.15016e-06
Lamp2	2.60372e-07	0.808897	0.81	0.763	0.00845013
3110040N11Rik	2.88595e-07	-2.3336	0.048	0.385	0.00936606
Dph3	2.88745e-07	-0.898845	0.46	0.84	0.00937092
Tm6sf1	2.92155e-07	1.8483	0.444	0.232	0.00948161
Hcfc1r1	3.95338e-12	0.798652	1	0.989	1.28303e-07
Trpc5	3.02732e-07	7.18152	0.016	0	0.00982487
Oca2	3.02732e-07	6.62509	0.016	0	0.00982487
Hcls1	3.02732e-07	6.5511	0.016	0	0.00982487
Rnf138rt1	3.02732e-07	6.5405	0.016	0	0.00982487
1700085C21Rik	3.02732e-07	6.4313	0.016	0	0.00982487
Ggt1	3.02732e-07	6.40897	0.016	0	0.00982487
Maats1	3.02732e-07	6.35391	0.016	0	0.00982487
Tll1	3.02732e-07	6.26879	0.016	0	0.00982487
Actn3	3.02732e-07	6.25079	0.016	0	0.00982487
Cdca5	3.02732e-07	6.17604	0.016	0	0.00982487
Oprl1	3.02732e-07	6.15714	0.016	0	0.00982487
Atp10b	3.02732e-07	6.14542	0.016	0	0.00982487
Pdzd7	3.02732e-07	6.1324	0.016	0	0.00982487
Gm8994	3.02732e-07	5.99947	0.016	0	0.00982487
Mrps16	5.77204e-07	-0.659279	0.556	0.894	0.0187326
Myl3	2.70819e-17	-0.649993	1	1	8.78915e-13
Itga11	3.05988e-07	5.91615	0.016	0	0.00993054
Iglon5	3.05988e-07	5.83882	0.016	0	0.00993054
Anpep	3.05988e-07	5.83095	0.016	0	0.00993054
Gm37637	3.05988e-07	5.78416	0.016	0	0.00993054
Gm29395	3.05988e-07	5.77715	0.016	0	0.00993054
Ramp2	3.05988e-07	5.73363	0.016	0	0.00993054
Magel2	3.05988e-07	5.72649	0.016	0	0.00993054
Mrpl11	3.06973e-07	-0.778697	0.444	0.82	0.00996249
Tex43	3.09278e-07	5.51269	0.016	0	0.0100373
Myl12a	1.23865e-08	0.781848	0.889	0.893	0.000401992
Immt	4.21263e-08	-0.641877	0.857	0.953	0.00136717
Ubxn1	1.01324e-06	-0.64042	0.746	0.937	0.0328836
Uchl3	3.2171e-07	-1.3485	0.175	0.561	0.0104408
Mbd2	3.22052e-07	-1.24549	0.27	0.647	0.0104519
Casq2	2.24954e-13	0.776747	0.984	0.986	7.30066e-09
Gdf15	3.29135e-07	-4.73345	0	0.303	0.0106818
Galnt18	3.31703e-07	-1.85709	0.111	0.472	0.0107651
Bik	3.31751e-07	-1.82662	0.095	0.457	0.0107667
Smad4	3.32622e-07	-1.25114	0.19	0.563	0.0107949
Senp6	3.53217e-07	-0.769147	0.476	0.849	0.0114633
mt-Co3	1.92305e-27	0.774452	1	1	6.24106e-23
Hdgfl3	3.68762e-07	-4.11185	0	0.301	0.0119678
Cdh2	4.28212e-07	0.771344	0.921	0.889	0.0138972
Rps15a	3.86213e-07	-0.315084	1	1	0.0125342
Pabpn1	4.27414e-07	1.80974	0.429	0.226	0.0138713
Camk2d	1.73116e-07	0.738371	0.905	0.87	0.0056183
Eef1g	1.78459e-08	0.727969	0.937	0.933	0.00057917
Dhrs4	4.31473e-07	-1.21956	0.286	0.662	0.014003
Nsd1	4.44962e-07	-1.23764	0.286	0.652	0.0144408
Mtch2	1.49003e-08	0.72102	0.873	0.79	0.000483573
Ndufb2	4.45699e-16	0.71729	1	0.987	1.44647e-11
Rpl12	9.87354e-11	-0.639422	0.937	0.996	3.20436e-06
Dynlrb1	4.29371e-07	0.713204	0.905	0.91	0.0139348
Vcan	8.6111e-07	0.703808	0.952	0.896	0.0279465
Prrc2c	4.83092e-07	-0.90773	0.429	0.815	0.0156783
Cox8a	4.91265e-07	-0.250645	1	1	0.0159435
Med10	4.93192e-07	-1.13384	0.222	0.622	0.016006
Rps28	1.60398e-12	0.685867	1	0.987	5.20556e-08
Gabarap	4.96632e-07	-0.415066	0.968	0.994	0.0161177
Dgcr6	4.97876e-07	-0.889169	0.476	0.805	0.0161581
Psmc2	5.13592e-07	-1.05972	0.333	0.705	0.0166681
Eif1	2.44606e-21	-0.632087	0.984	1	7.93846e-17
Lxn	5.20847e-07	1.61808	0.492	0.268	0.0169036
Rnf128	5.27084e-07	2.25034	0.317	0.131	0.017106
Aldh2	5.51003e-07	-1.51824	0.19	0.555	0.0178822
Mrps24	5.5302e-07	-0.524848	0.873	0.974	0.0179477
Thoc7	3.0344e-07	-0.630706	0.635	0.929	0.00984783
Rps21	4.68912e-15	-0.62717	0.968	0.999	1.52181e-10
Nenf	5.8113e-07	-0.573199	0.841	0.977	0.01886
Gclm	5.85792e-07	-1.43633	0.19	0.552	0.0190113
Vps36	5.94977e-07	-1.23166	0.206	0.597	0.0193094
Trdn	5.99609e-07	-0.432609	0.984	0.999	0.0194597
Ndufs7	3.74893e-12	-0.625638	0.968	0.997	1.21668e-07
Agrn	6.14396e-07	1.58104	0.476	0.268	0.0199396
Eloa	6.32914e-07	-4.01546	0	0.291	0.0205406
Clcn5	6.34957e-07	2.37536	0.27	0.099	0.0206069
B230118H07Rik	6.47264e-07	-0.938841	0.397	0.786	0.0210063
Klf10	6.5276e-07	-1.69498	0.127	0.478	0.0211847
Gm11361	6.54451e-07	-3.97997	0	0.291	0.0212396
Ppil6	6.69868e-07	-2.41908	0.048	0.369	0.0217399
Mib1	6.77287e-07	1.46111	0.492	0.293	0.0219807
Park7	6.79201e-07	-0.455132	0.921	0.984	0.0220428
Rpl23a	1.62252e-10	0.68504	1	0.99	5.26574e-06
Gtf2h5	2.45285e-07	-0.624128	0.746	0.965	0.00796049
Spcs1	1.32842e-06	0.675316	0.937	0.931	0.0431127
Pdcd5	2.09628e-10	-0.617332	0.889	0.993	6.80325e-06
Eif5a	1.05624e-09	-0.610965	0.905	0.993	3.42793e-05
Uqcrc2	4.55067e-08	-0.608979	0.889	0.983	0.00147687
Nova1	7.1756e-07	3.27669	0.095	0.016	0.0232877
Syngr1	7.40445e-07	-1.19113	0.286	0.657	0.0240304
Ndufa11	7.55637e-07	-0.339883	1	1	0.0245235
Lpcat4	7.73691e-07	5.05765	0.032	0.002	0.0251094
Ramp1	3.89452e-10	-0.605549	0.984	0.999	1.26393e-05
Cd46	7.80445e-07	3.47094	0.079	0.011	0.0253286
Pgm1	7.81745e-07	4.81963	0.032	0.002	0.0253708
Csnk2a1	8.04251e-07	1.52238	0.492	0.298	0.0261012
Itih5	8.14495e-07	4.35554	0.063	0.007	0.0264336
8430408G22Rik	8.20817e-07	-1.4352	0.159	0.519	0.0266388
Eid2	8.29122e-07	-1.63042	0.127	0.479	0.0269083
Hspa1a	8.48007e-07	-2.78164	0.032	0.337	0.0275212
Rpl17	9.56469e-10	0.669371	1	0.995	3.10413e-05
Hnrnpk	4.62896e-09	0.653963	0.921	0.936	0.000150228
Spata33	8.74053e-07	-2.14319	0.032	0.343	0.0283665
Larp1b	8.86424e-07	-1.72211	0.095	0.442	0.028768
Retreg2	9.02776e-07	-3.93847	0	0.285	0.0292987
Ywhah	1.47001e-06	0.646572	0.952	0.917	0.0477078
Usmg5	2.15916e-13	0.630019	1	0.999	7.00734e-09
Washc2	9.22918e-07	-3.92999	0	0.285	0.0299524
Abhd8	9.25026e-07	-1.84605	0.111	0.446	0.0300208
Cebpb	9.3369e-07	-1.38359	0.302	0.643	0.030302
Ppp1r10	9.5242e-07	-1.93751	0.111	0.443	0.0309098
Plekha5	9.66628e-07	1.60887	0.413	0.21	0.0313709
Rpl27a	5.49448e-17	-0.603005	0.984	1	1.78318e-12
Rps14	2.30867e-18	0.627846	1	1	7.49256e-14
Snrpb	3.33089e-08	-0.601252	0.762	0.962	0.00108101
Psmd11	9.86011e-07	-0.951419	0.365	0.752	0.032
Prpf4b	9.95579e-07	-1.14799	0.222	0.613	0.0323105
Psmd1	9.99086e-07	-0.947061	0.349	0.721	0.0324243
Npm1	1.00468e-06	-0.489419	0.968	0.988	0.0326059
Mylk4	1.00669e-06	-2.42628	0.048	0.359	0.032671
Scand1	3.04192e-07	-0.60089	0.825	0.974	0.00987224
Rpl22	3.12619e-12	-0.598579	0.968	0.998	1.01457e-07
Actc1	4.58444e-11	0.627022	1	1	1.48783e-06
Pgam2	2.32987e-07	0.622172	0.968	0.988	0.00756134
Ndufb5	9.64976e-19	-0.597142	1	0.999	3.13173e-14
Adgrd1	1.1107e-06	3.95391	0.063	0.008	0.0360468
Dnajb1	1.15153e-06	-1.91933	0.238	0.584	0.0373717
Mapk1ip1l	1.19071e-06	1.76018	0.429	0.231	0.0386434
Mybpc3	4.95794e-07	0.62151	0.968	0.954	0.0160905
2010107E04Rik	1.21204e-15	0.616192	1	0.999	3.93356e-11
Cbl	1.23792e-06	1.99364	0.333	0.149	0.0401755
Armcx4	1.24666e-06	1.87246	0.429	0.237	0.0404591
Grk3	1.25496e-06	-3.97261	0	0.279	0.0407284
Rps12-ps3	1.26765e-06	1.90194	0.381	0.193	0.0411403
Psma2	1.31896e-07	-0.589819	0.778	0.975	0.00428057
Atp5d	1.27742e-06	-0.380546	0.984	0.999	0.0414573
Rps13	9.93908e-16	-0.585419	0.968	1	3.22563e-11
Rpl14	1.23316e-15	0.612697	1	0.998	4.00208e-11
Cnbp	1.41812e-06	-0.536681	0.825	0.968	0.0460236
Vezt	1.42893e-06	1.60591	0.429	0.236	0.0463746
Prdx5	1.42916e-06	-0.50358	0.921	0.99	0.0463818
Rdm1	1.43545e-06	-1.39367	0.143	0.502	0.0465861
Paip2	2.62015e-09	0.60025	0.937	0.953	8.50345e-05
Mindy2	1.47774e-06	-3.9224	0	0.277	0.0479586
Decr1	1.50328e-06	-0.968258	0.381	0.769	0.0487874
Rpl11	8.44783e-14	0.596301	1	0.998	2.74166e-09
Baiap2l1	1.55355e-06	-1.91292	0.079	0.401	0.050419
Arl8a	1.56017e-06	-3.92524	0	0.276	0.0506339
Zfp445	1.56017e-06	-3.90005	0	0.276	0.0506339
Gm26735	1.56075e-06	-3.01194	0.016	0.304	0.0506525
Dsp	1.5729e-06	0.863738	0.841	0.819	0.0510468
Klhl9	1.58441e-06	1.38207	0.54	0.37	0.0514203
Rras2	1.59514e-06	1.6891	0.492	0.304	0.0517687
Dnttip2	1.59944e-06	-2.00094	0.095	0.409	0.0519081
Ndufs2	1.60351e-06	-0.455342	1	0.99	0.0520402
Hipk2	1.61274e-06	-1.75093	0.127	0.456	0.05234
Epdr1	1.68935e-06	3.75886	0.063	0.008	0.0548263
Umad1	1.70991e-06	2.32031	0.238	0.083	0.0554933
Tesc	1.71781e-06	-0.67189	0.857	0.958	0.0557498
Tnnt2	1.72161e-06	0.416379	1	1	0.0558732
Robo2	1.72521e-06	3.30633	0.143	0.034	0.05599
Phyh	1.72883e-06	-0.780976	0.476	0.809	0.0561075
Tln2	1.75454e-06	-1.07897	0.349	0.691	0.0569418
U2af1	1.76899e-06	-0.760985	0.556	0.849	0.0574107
Tmem30a	1.77581e-06	0.924604	0.762	0.656	0.057632
Ndufa8	1.81768e-06	-0.400356	0.984	0.992	0.0589908
Rdh14	1.9528e-06	-0.851791	0.444	0.822	0.0633761
Ap2m1	1.95676e-06	0.831256	0.762	0.677	0.0635047
Ier3ip1	1.9647e-06	1.26415	0.651	0.53	0.0637624
Pelo	1.97735e-06	3.62253	0.079	0.012	0.064173
Lamb3	1.9891e-06	-1.21952	0.429	0.709	0.0645543
Adam10	2.1267e-06	1.60016	0.571	0.421	0.0690201
Chchd3	2.12823e-06	-0.500952	0.857	0.969	0.0690696
Pdcd10	2.15554e-06	-0.986872	0.159	0.53	0.0699559
Pdlim4	2.15725e-06	-3.45765	0.016	0.293	0.0700115
Nfic	2.16544e-06	-0.886002	0.333	0.705	0.0702773
Dusp6	2.19038e-06	-1.27637	0.127	0.47	0.0710867
Mical2	2.1988e-06	1.99151	0.429	0.249	0.0713597
Rpl35a	2.22571e-06	0.326966	1	0.999	0.0722333
Sap30l	2.23287e-06	-1.26905	0.19	0.55	0.0724656
Ntan1	2.24798e-06	-0.723582	0.317	0.707	0.072956
Auts2	2.26064e-06	-1.8651	0.095	0.41	0.0733669
Apopt1	2.27237e-06	-1.08032	0.238	0.609	0.0737475
Ngrn	2.27852e-06	-1.31038	0.175	0.534	0.0739472
Rnf5	2.29475e-06	1.40451	0.492	0.303	0.0744739
Apex1	2.30418e-06	-1.08587	0.19	0.555	0.0747799
Kif21a	2.31075e-06	-1.52883	0.175	0.507	0.0749931
Dtnbp1	2.31697e-06	-0.929285	0.444	0.769	0.075195
Abhd4	2.33852e-06	1.66839	0.444	0.256	0.0758942
Slamf1	2.36018e-06	5.20359	0.032	0.002	0.0765971
Ptprt	2.37146e-06	5.04077	0.032	0.002	0.0769632
Lpcat3	2.39149e-06	-1.45317	0.079	0.406	0.0776134
Tmf1	2.40559e-06	-1.456	0.111	0.44	0.0780711
Zfp36	2.43741e-06	-1.69766	0.19	0.51	0.0791036
Tnpo2	2.43973e-06	1.8397	0.286	0.114	0.079179
Slf2	2.45248e-06	-3.92528	0	0.268	0.0795929
Eif3i	2.45491e-06	-0.617647	0.762	0.937	0.0796716
Rpl3	2.473e-06	-0.315823	0.984	1	0.0802588
Nsmce4a	2.51279e-06	-0.772627	0.381	0.762	0.0815502
Ap1m1	2.53099e-06	1.61387	0.46	0.276	0.0821408
Parl	2.55249e-06	-1.14102	0.238	0.612	0.0828386
Abra	2.61841e-06	-1.63122	0.19	0.512	0.0849779
Snrnp48	2.65064e-06	-1.23936	0.159	0.515	0.0860238
Atp2b4	2.67408e-06	1.94699	0.365	0.18	0.0867845
Myl9	2.69303e-06	0.747141	0.968	0.865	0.0873996
Pomk	2.73398e-06	3.11137	0.127	0.029	0.0887287
Pfas	2.74661e-06	2.70499	0.159	0.042	0.0891386
Akap9	2.75095e-06	-0.966611	0.397	0.734	0.0892792
Amer1	2.76229e-06	-1.62699	0.143	0.474	0.0896474
Cxcl12	2.78582e-06	2.54409	0.524	0.378	0.090411
Actr10	2.80057e-06	-0.871836	0.429	0.76	0.0908896
Cdc40	2.80658e-06	-1.59444	0.127	0.462	0.0910847
C130080G10Rik	2.82742e-06	-0.762205	0.556	0.871	0.091761
9130221H12Rik	2.84749e-06	3.55815	0.095	0.017	0.0924123
Snrpe	2.85104e-06	-0.444518	0.778	0.972	0.0925276
Slc8a1	2.86102e-06	-1.18012	0.238	0.599	0.0928514
Ccdc59	2.90375e-06	-0.877532	0.206	0.562	0.0942383
Rc3h2	2.99162e-06	1.70313	0.444	0.264	0.0970899
Jup	3.02205e-06	1.07013	0.667	0.526	0.0980776
Washc1	3.10009e-06	-3.81694	0	0.263	0.10061
Setd3	3.11701e-06	-1.13954	0.206	0.569	0.101159
Pnpla2	3.1514e-06	-1.22313	0.206	0.559	0.102275
Nsd2	3.23441e-06	-3.83522	0	0.263	0.104969
Pomp	3.28627e-06	-0.484126	0.873	0.96	0.106653
Lrrc10	3.32541e-06	-0.782225	0.651	0.884	0.107923
Tceal5	3.38662e-06	2.22808	0.254	0.095	0.10991
Psme3	3.39301e-06	1.8517	0.381	0.201	0.110117
Atp1a1	3.39902e-06	0.522596	1	0.994	0.110312
Pja2	3.41083e-06	0.68158	0.857	0.776	0.110695
Taf11	3.43675e-06	-1.33137	0.175	0.519	0.111536
C030006K11Rik	3.4465e-06	-3.80641	0	0.261	0.111853
Id1	3.46336e-06	-2.06209	0.111	0.42	0.1124
Nfs1	3.47581e-06	-1.38238	0.143	0.473	0.112804
Bcl7b	3.49079e-06	-1.35229	0.175	0.512	0.11329
Morf4l1	3.64535e-06	0.374056	1	0.996	0.118306
Gucy1b1	3.67203e-06	-3.85428	0	0.26	0.119172
Trmt1l	3.71875e-06	1.68711	0.349	0.168	0.120688
Ttpal	3.7207e-06	2.56276	0.159	0.043	0.120752
Pdk3	3.72772e-06	1.48928	0.508	0.337	0.120979
Abca1	3.77885e-06	2.09349	0.333	0.157	0.122639
Dusp5	3.78014e-06	-2.86002	0.032	0.306	0.122681
Tug1	3.83024e-06	-3.808	0	0.259	0.124307
Ndufs3	3.84484e-06	-0.446792	0.921	0.989	0.124781
Lars2	3.85287e-06	-2.19336	0.095	0.393	0.125041
Ube2s	3.8967e-06	-0.594212	0.81	0.951	0.126463
Ccdc85b	3.98362e-06	-1.60025	0.095	0.418	0.129284
Ccng1	3.99413e-06	1.14166	0.635	0.53	0.129626
Timm9	4.09039e-06	-1.0594	0.286	0.662	0.13275
Txndc17	4.09886e-06	-0.646123	0.73	0.903	0.133024
Lppos	4.10457e-06	-1.08838	0.238	0.603	0.13321
Hand1	4.13504e-06	3.52166	0.095	0.018	0.134199
Sat1	4.14449e-06	-1.64193	0.175	0.497	0.134505
Gtf3c2	4.17011e-06	1.55643	0.397	0.21	0.135337
Tet2	4.23789e-06	1.65466	0.413	0.231	0.137536
Mid1ip1	4.29977e-06	-1.43194	0.254	0.573	0.139545
Hist3h2ba	4.3147e-06	1.97495	0.286	0.116	0.140029
Sike1	4.34583e-06	1.01358	0.619	0.469	0.14104
Tceal6	4.45659e-06	3.58028	0.063	0.008	0.144634
Cnih4	4.46867e-06	-0.838621	0.397	0.765	0.145026
Brd7	4.48155e-06	-1.1138	0.556	0.813	0.145444
Myl2	4.57177e-06	0.285761	1	1	0.148372
Ate1	4.64356e-06	-1.30188	0.206	0.543	0.150702
Tspan6	4.65533e-06	2.89497	0.175	0.052	0.151084
Esd	4.65961e-06	-0.544952	0.81	0.966	0.151223
Atp2a2	4.79474e-06	-0.515182	0.984	0.998	0.155609
Pitpnb	4.81799e-06	-1.24855	0.206	0.551	0.156363
Epb41l3	4.82456e-06	1.76733	0.429	0.246	0.156576
Sugt1	4.86231e-06	-0.815534	0.397	0.746	0.157801
Sde2	4.94177e-06	-1.28673	0.175	0.515	0.16038
Fbxo38	4.94522e-06	1.81423	0.333	0.155	0.160492
Frat2	5.08474e-06	-3.27242	0.016	0.281	0.16502
Acads	5.11246e-06	-0.758718	0.365	0.743	0.16592
Tmppe	5.14595e-06	4.41556	0.048	0.005	0.167007
Fkbp9	5.2813e-06	1.05198	0.683	0.549	0.171399
Wipi1	5.29661e-06	-0.839649	0.238	0.612	0.171896
Mrpl16	5.31934e-06	-0.988355	0.238	0.603	0.172634
Nebl	5.32999e-06	-0.444147	0.952	0.987	0.172979
Inafm2	5.33989e-06	1.35565	0.524	0.362	0.173301
Spin1	5.50429e-06	1.20359	0.54	0.371	0.178636
Filip1l	5.58448e-06	-2.74774	0.016	0.282	0.181239
Llgl1	5.63891e-06	2.26448	0.206	0.069	0.183005
Alcam	5.64881e-06	1.33913	0.54	0.354	0.183327
Psmc5	5.66851e-06	-0.722801	0.54	0.848	0.183966
Lsmem1	5.67418e-06	-1.19282	0.19	0.534	0.18415
Chordc1	5.68825e-06	-1.28993	0.19	0.529	0.184606
Pxdn	5.97266e-06	2.37697	0.206	0.069	0.193837
Smc1a	6.00752e-06	-1.21805	0.238	0.575	0.194968
Mrpl27	6.00875e-06	-0.664807	0.524	0.848	0.195008
Masp1	6.12505e-06	-3.38209	0.016	0.271	0.198782
Tekt1	6.26392e-06	4.64058	0.032	0.002	0.203289
Tagln3	6.31944e-06	4.57626	0.032	0.002	0.205091
Gabre	6.37543e-06	4.58026	0.032	0.002	0.206908
Gng11	6.39087e-06	1.7207	0.413	0.227	0.207409
Ndufa13	6.40412e-06	-0.240127	1	1	0.207839
Nectin3	6.45853e-06	-3.76482	0	0.25	0.209605
Clta	6.59592e-06	-0.532957	0.762	0.958	0.214064
Mylk3	6.66851e-06	-0.478765	0.825	0.959	0.21642
Timm29	6.94375e-06	-3.71249	0	0.249	0.225353
Hcn4	6.95691e-06	-2.08014	0.079	0.367	0.225779
Glg1	6.97311e-06	-0.960847	0.302	0.642	0.226305
Pdxp	7.01589e-06	-3.77912	0	0.248	0.227694
Pttg1	7.06375e-06	-1.4852	0.127	0.436	0.229247
Tomm40	7.09173e-06	-0.884214	0.349	0.712	0.230155
Rgma	7.22597e-06	-2.85976	0.016	0.276	0.234512
Mrps31	7.27712e-06	-0.976492	0.302	0.665	0.236172
Nedd4l	7.31935e-06	1.3164	0.46	0.273	0.237542
Ehd4	7.36476e-06	-0.784299	0.651	0.853	0.239016
2300009A05Rik	7.43978e-06	-0.713166	0.587	0.882	0.241451
Polr2c	7.48398e-06	-0.732221	0.524	0.845	0.242885
Prps1	7.50689e-06	1.40941	0.54	0.377	0.243628
Dnajc5	7.59163e-06	0.986061	0.635	0.54	0.246379
Ubxn2a	7.71378e-06	-1.34613	0.159	0.484	0.250343
Adssl1	7.72314e-06	-0.681834	0.619	0.875	0.250647
Tgfbr3	7.80069e-06	1.79837	0.397	0.218	0.253163
Pcolce	7.82513e-06	1.65295	0.381	0.197	0.253957
Tex261	7.85703e-06	-1.0511	0.222	0.567	0.254992
Nt5dc2	7.90818e-06	1.20755	0.683	0.619	0.256652
Arl5b	7.97297e-06	1.94747	0.302	0.135	0.258755
Naa38	8.22568e-06	0.709631	0.873	0.786	0.266956
Smoc2	8.36962e-06	2.63695	0.397	0.219	0.271628
App	8.39304e-06	0.800591	0.825	0.796	0.272388
Wnt5a	8.40207e-06	2.85039	0.159	0.045	0.272681
Lamtor2	8.47201e-06	-0.552072	0.698	0.939	0.274951
Dnaja4	8.55898e-06	-1.07676	0.302	0.638	0.277773
Ndufa6	8.71213e-06	0.352995	1	0.999	0.282744
Ube2l3	8.93543e-06	-0.632032	0.651	0.9	0.28999
Sec61g	9.16341e-06	0.530491	0.984	0.981	0.297389
Adnp	9.16739e-06	-3.69159	0	0.243	0.297518
Ankrd12	9.27418e-06	-1.89179	0.079	0.37	0.300984
Fam8a1	9.31362e-06	1.442	0.476	0.311	0.302264
Smg6	9.47802e-06	-1.41858	0.079	0.381	0.3076
Lgr4	9.50011e-06	1.69523	0.365	0.191	0.308317
Sys1	9.52279e-06	-0.806127	0.317	0.711	0.309053
Echs1	9.54097e-06	-0.65254	0.667	0.897	0.309643
Gpatch11	9.54847e-06	-1.63728	0.127	0.421	0.309886
Ephx2	9.61742e-06	-1.50777	0.095	0.396	0.312124
Foxn3	9.63914e-06	-0.989886	0.349	0.685	0.312829
Degs1	9.68865e-06	1.26525	0.619	0.502	0.314436
Bmt2	9.74783e-06	-3.67828	0	0.242	0.316356
Cavin2	9.94909e-06	-3.92232	0	0.242	0.322888
Foxp1	9.98103e-06	0.981599	0.571	0.405	0.323924
Pigt	9.99291e-06	1.60186	0.413	0.231	0.32431
Btf3	1.01437e-05	-0.404226	0.952	0.994	0.329204
Pin4	1.01766e-05	-0.756762	0.349	0.752	0.330272
Eif3h	1.03393e-05	-0.507925	0.841	0.96	0.335551
Rmnd1	1.03394e-05	-1.60342	0.079	0.379	0.335556
Fahd2a	1.05494e-05	-0.99532	0.222	0.579	0.342371
Usp53	1.06196e-05	-2.7861	0.016	0.269	0.344648
Gys1	1.0667e-05	1.71705	0.413	0.244	0.346187
Eif5	1.07215e-05	-0.529146	0.873	0.955	0.347955
Smim24	1.0745e-05	3.36476	0.079	0.014	0.348719
Cpq	1.08137e-05	-1.02489	0.238	0.578	0.350947
Rps8	1.09276e-05	0.309353	1	1	0.354644
Aifm1	1.0937e-05	-0.895435	0.222	0.582	0.354949
Adm	1.10703e-05	1.79879	0.302	0.131	0.359274
Dap3	1.11439e-05	-0.912267	0.317	0.667	0.361663
Ints6	1.11653e-05	-2.19181	0.032	0.298	0.362359
Prpf40a	1.11725e-05	-0.789884	0.333	0.698	0.362592
Adcy1	1.12371e-05	3.10676	0.111	0.025	0.36469
Ckb	1.12648e-05	-0.6157	0.778	0.935	0.365589
Rpl10a	1.12942e-05	0.330943	1	0.998	0.366544
Smc6	1.13573e-05	-0.813207	0.46	0.787	0.368591
Dusp14	1.14503e-05	3.20652	0.095	0.019	0.371608
Armcx5	1.15251e-05	-1.56391	0.095	0.396	0.374036
Drd2	1.1592e-05	-3.90789	0	0.239	0.376207
Lpxn	1.17695e-05	6.18678	0.016	0.001	0.381966
Cd86	1.17695e-05	5.95295	0.016	0.001	0.381966
Gm14327	1.17695e-05	5.91858	0.016	0.001	0.381966
Tram1l1	1.17695e-05	5.87543	0.016	0.001	0.381966
Srpx	1.17695e-05	5.87219	0.016	0.001	0.381966
Ptafr	1.17695e-05	5.85474	0.016	0.001	0.381966
Necab1	1.17695e-05	5.8375	0.016	0.001	0.381966
Cntn1	1.17695e-05	5.82642	0.016	0.001	0.381966
Rnase6	1.17695e-05	5.82145	0.016	0.001	0.381966
Nyx	1.17695e-05	5.80279	0.016	0.001	0.381966
C4b	1.17695e-05	5.78564	0.016	0.001	0.381966
Mmp13	1.17695e-05	5.72554	0.016	0.001	0.381966
Cps1	1.17695e-05	5.62317	0.016	0.001	0.381966
Sdhaf1	1.18019e-05	-0.721709	0.413	0.774	0.383019
Mrpl21	1.18418e-05	-0.690458	0.46	0.812	0.384315
Edn3	1.18642e-05	5.7929	0.016	0.001	0.385041
Hcn3	1.18642e-05	5.60137	0.016	0.001	0.385041
Ccser1	1.18642e-05	5.44748	0.016	0.001	0.385041
Cdh3	1.18642e-05	5.43456	0.016	0.001	0.385041
Islr	1.18642e-05	5.25452	0.016	0.001	0.385041
Dennd5a	1.18919e-05	1.19458	0.603	0.5	0.385941
Slc36a3os	1.19597e-05	5.42867	0.016	0.001	0.38814
Gm14091	1.19597e-05	5.29784	0.016	0.001	0.38814
Gm17334	1.20559e-05	5.36408	0.016	0.001	0.391263
Prkab2	1.24067e-05	1.44777	0.444	0.273	0.402648
Rnf38	1.24798e-05	1.81064	0.333	0.167	0.40502
Usp50	1.26364e-05	1.74682	0.349	0.181	0.410101
Rps27a	1.2665e-05	-0.247874	1	1	0.411029
Hykk	1.27829e-05	3.56923	0.063	0.009	0.414856
Lifr	1.28869e-05	1.08751	0.587	0.455	0.418232
Rock1	1.29122e-05	-0.665591	0.698	0.888	0.419054
Iscu	1.30349e-05	-0.609798	0.667	0.906	0.423034
Mrpl33	1.31069e-05	-0.352212	0.984	0.993	0.425372
Pdlim3	1.33293e-05	-0.933513	0.222	0.572	0.432589
Myom2	1.34698e-05	-1.8602	0.079	0.353	0.43715
Mgat4b	1.35956e-05	-1.00231	0.175	0.52	0.441231
Spock2	1.3612e-05	1.08257	0.635	0.522	0.441763
Mdp1	1.36214e-05	-0.502994	0.73	0.952	0.442069
Hint2	1.40004e-05	-0.561243	0.667	0.94	0.45437
Hmgcr	1.41563e-05	-1.30292	0.143	0.449	0.45943
Kcnq3	1.42687e-05	4.84391	0.032	0.002	0.463078
Sdc4	1.43938e-05	-0.607282	0.825	0.927	0.467136
Cbfb	1.43952e-05	1.70397	0.333	0.158	0.467182
Vkorc1	1.4499e-05	1.90096	0.27	0.114	0.470552
Bend5	1.45847e-05	-1.21155	0.111	0.421	0.473332
Sf3b5	1.4593e-05	-0.65294	0.603	0.883	0.4736
Arhgap5	1.46468e-05	-0.690792	0.603	0.863	0.475349
Slc38a4	1.46747e-05	1.7293	0.397	0.219	0.476253
Hint1	1.48204e-05	-0.259689	1	1	0.48098
Xpr1	1.48599e-05	1.7181	0.381	0.214	0.482262
Ndufa4l2	1.48613e-05	2.81733	0.175	0.054	0.482308
Tmeff1	1.49319e-05	3.42313	0.095	0.019	0.484599
Bod1l	1.49479e-05	-0.922909	0.302	0.671	0.485121
Trp53inp2	1.5037e-05	0.96812	0.714	0.672	0.488009
Fam122a	1.50936e-05	-1.21792	0.159	0.486	0.489847
Rpp25l	1.50961e-05	-1.14164	0.19	0.53	0.48993
Ice1	1.52239e-05	-1.8056	0.063	0.339	0.494077
Nit2	1.5527e-05	-1.04387	0.127	0.446	0.503912
Atp6v1f	1.55455e-05	-0.457773	0.889	0.981	0.504515
Snrnp27	1.58127e-05	0.992748	0.603	0.488	0.513185
Uvrag	1.5866e-05	-1.21283	0.111	0.42	0.514914
Timm8b	1.60325e-05	-0.398069	0.968	0.991	0.52032
C1qtnf4	1.60582e-05	-0.854229	0.444	0.75	0.521153
Epb41l4aos	1.62372e-05	-1.68411	0.095	0.383	0.526962
Fam168b	1.65159e-05	1.35523	0.476	0.324	0.536007
Ddx3x	1.66235e-05	1.02886	0.698	0.649	0.539498
Mettl22	1.6742e-05	-1.25188	0.143	0.454	0.543344
Dmac2	1.70147e-05	-3.57329	0	0.232	0.552193
Pofut2	1.70455e-05	1.07195	0.619	0.492	0.553194
Enah	1.70614e-05	0.84905	0.746	0.673	0.553711
Rps27l	1.71846e-05	0.482882	0.952	0.977	0.557708
Plpbp	1.71862e-05	-3.61432	0	0.231	0.557762
Otud1	1.71963e-05	-1.70507	0.159	0.451	0.558089
Arfgap2	1.72962e-05	-1.45376	0.143	0.436	0.561332
Tiparp	1.74069e-05	-1.31467	0.143	0.445	0.564924
Imp3	1.74938e-05	-0.676831	0.397	0.772	0.567745
Ppp2r2d	1.76053e-05	-1.17615	0.19	0.505	0.571361
Tmem242	1.76326e-05	0.930588	0.619	0.467	0.572249
Selenon	1.80695e-05	-3.59474	0	0.23	0.586426
Tnfrsf12a	1.81222e-05	-1.42998	0.254	0.555	0.588139
Mbtd1	1.82254e-05	1.33716	0.54	0.381	0.591488
Cul1	1.82495e-05	-0.890951	0.349	0.691	0.592268
Cebpz	1.83704e-05	-1.52202	0.079	0.367	0.596192
Tecr	1.84292e-05	-0.408487	0.889	0.966	0.598102
Ppt1	1.86486e-05	1.31441	0.429	0.254	0.605222
Rsbn1l	1.88213e-05	-0.941312	0.333	0.669	0.610825
Slc50a1	1.89346e-05	-1.31932	0.127	0.431	0.614503
Paip1	1.96493e-05	-1.36995	0.127	0.428	0.637699
Adk	1.97916e-05	-0.926781	0.222	0.561	0.642318
Pml	2.01128e-05	2.6692	0.143	0.04	0.652742
Nlgn2	2.03337e-05	3.03551	0.095	0.02	0.65991
Nup98	2.12007e-05	-3.55315	0	0.227	0.688047
Ank2	2.13192e-05	1.26963	0.587	0.458	0.691893
Parvb	2.13437e-05	1.45907	0.508	0.357	0.692689
Cep83	2.18591e-05	-2.80915	0.016	0.255	0.709416
H2afx	2.18668e-05	-2.62297	0.032	0.275	0.709664
Fam50a	2.19356e-05	-1.69895	0.079	0.359	0.711897
Tcim	2.22825e-05	-3.83913	0	0.226	0.723155
Fubp3	2.24292e-05	1.95717	0.27	0.12	0.727916
Cryzl2	2.25051e-05	-3.56907	0	0.226	0.730382
Tpm3	2.25229e-05	-2.94545	0.016	0.251	0.730958
Kidins220	2.2858e-05	-1.07655	0.079	0.372	0.741832
Mindy3	2.29569e-05	-3.51107	0	0.226	0.745045
Insig1	2.30195e-05	-1.79425	0.063	0.33	0.747074
Ranbp1	2.32401e-05	0.77121	0.73	0.652	0.754234
Ugdh	2.32728e-05	2.2871	0.19	0.066	0.755296
Rassf1	2.35239e-05	-1.38616	0.127	0.422	0.763444
Dnajc5b	2.3948e-05	-1.48694	0.143	0.441	0.777209
Ube3a	2.45551e-05	0.594602	0.937	0.875	0.79691
Lmna	2.50031e-05	-0.802575	0.54	0.807	0.811452
Snx6	2.5264e-05	-1.00666	0.222	0.555	0.819916
Prkaca	2.58216e-05	0.711316	0.841	0.881	0.838013
Lrch2	2.65452e-05	2.70137	0.127	0.033	0.861497
Agpat3	2.66299e-05	-0.598823	0.429	0.779	0.864245
Sparcl1	2.67205e-05	-0.729934	0.683	0.86	0.867186
Rae1	2.68062e-05	-1.01742	0.175	0.492	0.869969
Ptcd2	2.71826e-05	-1.10588	0.127	0.433	0.882185
Wdr3	2.74113e-05	1.80263	0.302	0.142	0.889608
Endou	2.77139e-05	-3.22638	0.016	0.247	0.899428
Bcl11a	2.79365e-05	2.46378	0.175	0.057	0.906653
2010320M18Rik	2.82721e-05	-0.807445	0.302	0.629	0.917543
Epn3	2.8292e-05	3.38749	0.063	0.01	0.91819
Sdhaf4	2.8402e-05	-0.614101	0.429	0.766	0.92176
Cops4	2.88495e-05	-0.721471	0.603	0.833	0.936281
Cenpb	2.89057e-05	-0.837747	0.238	0.594	0.938106
Hnrnpm	2.90293e-05	1.12491	0.587	0.47	0.942118
Ints13	2.93994e-05	-3.53831	0	0.221	0.954127
Tns3	2.96052e-05	1.52407	0.413	0.241	0.960807
Robo4	2.97193e-05	5.24204	0.032	0.003	0.96451
Fars2	2.99677e-05	-0.957854	0.175	0.499	0.972573
Mllt6	3.00102e-05	1.69789	0.349	0.187	0.973951
Mast4	3.02425e-05	0.685804	0.73	0.608	0.981489
Rfc1	3.07566e-05	-0.904153	0.286	0.611	0.998175
Gjc1	3.11429e-05	-0.748137	0.556	0.821	1
Cltc	3.16611e-05	0.730164	0.762	0.685	1
Wdr12	3.19149e-05	-2.23961	0.016	0.25	1
Slc2a1	3.19439e-05	1.60847	0.302	0.14	1
Dyrk1a	3.21096e-05	1.14409	0.508	0.353	1
C1qtnf12	3.21214e-05	-3.51289	0	0.219	1
Fam53a	3.26841e-05	-1.40894	0.127	0.41	1
Fbn1	3.29437e-05	2.62412	0.127	0.034	1
Srl	3.30385e-05	0.545302	0.921	0.919	1
Gnpda2	3.30988e-05	-1.95462	0.048	0.301	1
Scg5	3.35236e-05	3.03061	0.111	0.027	1
Erg28	3.37372e-05	-3.51065	0	0.218	1
Slc25a33	3.38888e-05	-2.27353	0.048	0.291	1
Hist1h4h	3.39382e-05	-2.67404	0.016	0.247	1
Dcbld2	3.41987e-05	2.34557	0.206	0.077	1
Ndufa10	3.42007e-05	-0.439056	0.841	0.981	1
Zfp622	3.46202e-05	-1.17945	0.206	0.52	1
Klhl13	3.4701e-05	1.37898	0.492	0.353	1
Chmp1b	3.47441e-05	-3.48962	0	0.218	1
Ptges3	3.5146e-05	-0.686216	0.571	0.841	1
Spcs2	3.51537e-05	-0.710295	0.571	0.852	1
Psmb6	3.53717e-05	-0.430524	0.873	0.987	1
Nlrp10	3.54333e-05	1.80308	0.381	0.218	1
Srrm1	3.57399e-05	-0.787335	0.444	0.771	1
Mrfap1	3.57512e-05	0.514822	0.952	0.928	1
Mindy4b-ps	3.57801e-05	-3.61497	0	0.217	1
As3mt	3.57868e-05	-0.83101	0.302	0.638	1
Plppr5	3.67386e-05	2.63551	0.143	0.042	1
Borcs7	3.68411e-05	-0.595338	0.397	0.745	1
Kyat1	3.68458e-05	-3.47379	0	0.217	1
Stam	3.73147e-05	1.61226	0.317	0.156	1
Iah1	3.7653e-05	-1.34739	0.127	0.407	1
Gm30025	3.79423e-05	-3.48394	0	0.216	1
Gm20342	3.82505e-05	2.05366	0.238	0.098	1
Ankrd46	3.83838e-05	1.46018	0.397	0.235	1
Etnk1	3.90381e-05	1.61306	0.381	0.22	1
Rasgef1b	3.92071e-05	-1.29494	0.143	0.437	1
Rps16	3.9453e-05	-0.229524	1	1	1
Gm15013	3.94533e-05	-3.44506	0	0.215	1
Nkap	4.04578e-05	-1.04114	0.19	0.496	1
Hsd17b10	4.05997e-05	-0.550575	0.667	0.902	1
Gatd1	4.06245e-05	-3.47283	0	0.215	1
Mfsd14a	4.06245e-05	-3.47887	0	0.215	1
Rab18	4.08703e-05	-0.664835	0.603	0.864	1
Rcan1	4.08989e-05	-1.04595	0.46	0.744	1
Ywhag	4.20952e-05	0.975267	0.683	0.607	1
Atg3	4.23116e-05	-0.903245	0.206	0.508	1
Hivep2	4.25469e-05	-1.36551	0.095	0.378	1
Taldo1	4.33594e-05	-0.658594	0.571	0.868	1
Txnrd3	4.34371e-05	-2.12472	0.032	0.271	1
Tbrg1	4.36299e-05	-0.979968	0.254	0.577	1
Egln1	4.39058e-05	-0.587747	0.619	0.876	1
Grb2	4.45813e-05	-0.57825	0.635	0.911	1
Ndufb8	4.5161e-05	-0.297714	1	1	1
Adora1	4.52729e-05	1.91378	0.302	0.144	1
Prdx4	4.52753e-05	0.927392	0.714	0.652	1
Irx5	4.60572e-05	-0.624641	0.73	0.903	1
Neurl2	4.61297e-05	-0.770625	0.381	0.723	1
Uxt	4.61414e-05	-1.12367	0.175	0.471	1
Ptp4a1	4.61591e-05	0.64123	0.857	0.773	1
Prdm2	4.66791e-05	-1.65616	0.079	0.344	1
Mob2	4.67083e-05	-1.20106	0.127	0.421	1
Ccnd3	4.71639e-05	0.540912	0.952	0.913	1
Fam120a	4.90234e-05	1.23912	0.492	0.327	1
2510009E07Rik	4.94419e-05	1.7156	0.317	0.161	1
Psmd13	4.97127e-05	-0.639169	0.556	0.828	1
Rb1cc1	4.98473e-05	-1.01137	0.302	0.606	1
Sema3a	4.99311e-05	1.2756	0.651	0.609	1
Atp6v0b	5.02064e-05	-0.404961	0.81	0.969	1
Hdac2	5.03285e-05	0.952165	0.619	0.567	1
Mrpl28	5.16942e-05	-0.589123	0.556	0.859	1
Pmvk	5.19873e-05	-0.853599	0.413	0.712	1
Uqcrfs1	5.22288e-05	-0.372932	0.984	0.996	1
Cystm1	5.22625e-05	-0.488274	0.492	0.85	1
Creg1	5.23039e-05	-1.25215	0.159	0.452	1
Ddc	5.25648e-05	1.83973	0.397	0.219	1
Vat1	5.27638e-05	2.81167	0.111	0.028	1
Tfb2m	5.28269e-05	-1.43694	0.063	0.314	1
Cidea	5.28966e-05	-1.02492	0.444	0.705	1
Ndn	5.37898e-05	0.979306	0.619	0.49	1
Nfix	5.41104e-05	-0.993785	0.111	0.402	1
Yy1	5.41551e-05	-0.929264	0.349	0.659	1
Mrpl2	5.49428e-05	-0.867144	0.317	0.664	1
Ercc1	5.58104e-05	-1.34649	0.079	0.346	1
Phax	5.58118e-05	-1.11283	0.222	0.536	1
Bzw2	5.61286e-05	-0.588513	0.635	0.883	1
Herpud1	5.61622e-05	-0.791139	0.444	0.756	1
Arid1a	5.62534e-05	1.19711	0.571	0.488	1
Gsg1l	5.64281e-05	-0.988723	0.27	0.577	1
Ccdc186	5.64449e-05	-1.18667	0.159	0.45	1
Snhg9	5.70747e-05	4.65333	0.032	0.003	1
B130046B21Rik	5.70747e-05	4.37518	0.032	0.003	1
Mrps18b	5.72987e-05	-1.13431	0.111	0.395	1
Srp9	5.73226e-05	-0.502	0.73	0.938	1
Wdr82	5.76851e-05	1.49657	0.397	0.236	1
Abi2	5.79248e-05	1.45937	0.381	0.217	1
Slco3a1	5.82019e-05	0.629071	0.857	0.847	1
Ppp1r3a	5.84938e-05	-1.15037	0.222	0.525	1
Slc25a25	5.88027e-05	-2.65236	0.032	0.256	1
Col6a3	5.89555e-05	4.01284	0.032	0.003	1
Trappc6b	5.93269e-05	-0.708039	0.476	0.79	1
Mrps23	5.94418e-05	-0.669079	0.397	0.726	1
Mid2	6.02619e-05	1.4543	0.381	0.224	1
Mrpl32	6.07321e-05	-0.767492	0.444	0.758	1
Amhr2	6.21552e-05	1.60953	0.429	0.268	1
Aven	6.2607e-05	-1.97992	0.048	0.286	1
Ybx3	6.28748e-05	-0.623147	0.587	0.899	1
Zmym2	6.30165e-05	1.16386	0.476	0.317	1
Ift74	6.31044e-05	-1.97049	0.048	0.286	1
Adck2	6.3777e-05	3.27885	0.079	0.016	1
Tmem41b	6.42428e-05	-1.17569	0.222	0.509	1
Zfp81	6.43359e-05	2.26099	0.19	0.07	1
Pirt	6.48613e-05	2.77241	0.159	0.052	1
Fgf13	6.53088e-05	1.21964	0.619	0.51	1
Spata24	6.60866e-05	-1.16889	0.095	0.358	1
Mrto4	6.68264e-05	-1.08802	0.127	0.422	1
Uri1	6.71439e-05	-1.03787	0.254	0.563	1
Get4	6.73064e-05	1.1195	0.54	0.429	1
Araf	6.78574e-05	1.30754	0.508	0.392	1
Slc39a11	6.86644e-05	2.56637	0.143	0.043	1
Ppp4c	6.94558e-05	1.83085	0.333	0.182	1
Slc22a17	6.99016e-05	1.05523	0.54	0.404	1
Hbegf	7.06896e-05	-0.967395	0.381	0.676	1
Use1	7.12886e-05	-0.515551	0.54	0.841	1
Xpa	7.20113e-05	-1.34093	0.111	0.389	1
Pgam5	7.23554e-05	1.61546	0.317	0.165	1
Rbfa	7.30016e-05	-0.989514	0.238	0.553	1
Zfp326	7.39572e-05	-0.841183	0.302	0.62	1
Scn10a	7.41921e-05	-0.768426	0.333	0.642	1
Mrps18c	7.51232e-05	-0.544258	0.54	0.843	1
Fndc3b	7.52676e-05	1.06939	0.603	0.522	1
Slc48a1	7.6891e-05	-0.769313	0.333	0.652	1
Pold4	7.76535e-05	-0.891272	0.175	0.478	1
Acin1	7.77404e-05	-0.782204	0.27	0.607	1
Heca	7.80546e-05	-1.15462	0.079	0.339	1
Pmpca	7.80621e-05	1.31006	0.46	0.332	1
Ywhab	7.83884e-05	0.53688	0.873	0.878	1
Rpl29	7.85397e-05	-1.0171	0.254	0.552	1
Psma5	7.85995e-05	-0.493817	0.698	0.906	1
Commd7	7.88556e-05	-0.807717	0.238	0.569	1
Iqgap3	7.97214e-05	2.83502	0.111	0.029	1
Vps13c	8.05631e-05	-2.57823	0.016	0.23	1
Plpp1	8.11822e-05	-1.12136	0.095	0.368	1
Scx	8.12879e-05	-3.47295	0	0.201	1
Itga7	8.14476e-05	-2.00351	0.063	0.295	1
Rab11fip2	8.20414e-05	-2.10513	0.032	0.258	1
Irx4	8.2461e-05	1.76831	0.317	0.163	1
Crip1	8.31448e-05	-0.434995	0.841	0.978	1
Gm5111	8.3179e-05	2.86672	0.079	0.016	1
Zyx	8.32916e-05	1.4005	0.444	0.297	1
Trappc4	8.34047e-05	-0.830943	0.302	0.612	1
Trim63	8.43541e-05	-0.620342	0.619	0.873	1
Rida	8.52483e-05	-3.33889	0	0.2	1
Zc3hav1l	8.61815e-05	2.81447	0.127	0.037	1
Ankrd40	8.62851e-05	-0.659259	0.603	0.828	1
Ormdl2	8.71944e-05	1.395	0.365	0.208	1
Hspg2	8.73727e-05	0.924187	0.667	0.627	1
Ptpro	8.75129e-05	2.52231	0.159	0.053	1
Atxn7l3b	9.01437e-05	-0.496716	0.81	0.944	1
Eea1	9.03768e-05	-0.802253	0.286	0.612	1
Alas1	9.09687e-05	-1.20977	0.095	0.351	1
Gm43672	9.09947e-05	-1.39527	0.063	0.312	1
Kpnb1	9.1923e-05	1.12387	0.54	0.41	1
Tnks2	9.3401e-05	1.04433	0.635	0.588	1
Phf21a	9.4337e-05	1.52982	0.349	0.196	1
Fdft1	9.44431e-05	-1.18728	0.143	0.426	1
Mllt3	9.57225e-05	1.14657	0.54	0.392	1
Polr1d	9.58647e-05	-0.49512	0.651	0.91	1
Slc6a13	9.61226e-05	-1.62651	0.048	0.282	1
Ndufb3	9.71805e-05	-0.31713	0.921	0.99	1
Fam98c	9.77218e-05	-1.70129	0.063	0.303	1
Upf3a	9.78826e-05	-1.82888	0.048	0.277	1
Mettl5	9.90984e-05	-0.983326	0.111	0.387	1
Rnf44	9.93327e-05	2.11596	0.206	0.082	1
Pex7	0.00010019	-0.800629	0.286	0.627	1
Inf2	0.000100525	1.83581	0.349	0.2	1
Tsr3	0.000100966	-0.92767	0.111	0.388	1
Adh5	0.000101642	-0.69577	0.556	0.821	1
Gm15247	0.000101735	4.46355	0.032	0.003	1
Epb41l1	0.000102031	1.9068	0.27	0.127	1
Riok2	0.000103038	-3.28561	0	0.196	1
Tubb4a	0.000103126	4.33978	0.032	0.003	1
Mvb12a	0.000103403	-1.18779	0.127	0.395	1
Inpp4b	0.000104645	-1.12371	0.175	0.448	1
Pigp	0.000107432	-0.463497	0.778	0.916	1
Sirpa	0.000107843	2.06594	0.27	0.129	1
Rab24	0.000107994	-0.591622	0.397	0.75	1
Supt6	0.000108216	-1.41962	0.095	0.353	1
Grin2a	0.000108328	6.52992	0.016	0.001	1
Gm43263	0.000108328	5.85948	0.016	0.001	1
Gm28989	0.000108328	5.6695	0.016	0.001	1
Wdfy4	0.000108328	5.63472	0.016	0.001	1
Hrct1	0.000108328	5.55295	0.016	0.001	1
Gm15498	0.000108328	5.54298	0.016	0.001	1
Tgm4	0.000108328	5.43783	0.016	0.001	1
Fam89b	0.000108328	5.35889	0.016	0.001	1
Gm16223	0.000108328	5.35065	0.016	0.001	1
Ap1s3	0.000109025	5.44963	0.016	0.001	1
Slfn2	0.000109025	5.44427	0.016	0.001	1
Fibin	0.000109025	5.28091	0.016	0.001	1
Gm14019	0.000109025	5.11292	0.016	0.001	1
Rps9	0.000109259	-0.222534	1	1	1
Ntn4	0.000109726	5.31284	0.016	0.001	1
Cldn5	0.000109726	5.23128	0.016	0.001	1
Rgs8	0.000109726	5.18016	0.016	0.001	1
Cks1brt	0.000109726	5.07513	0.016	0.001	1
Gpc6	0.000109726	5.03507	0.016	0.001	1
Tbx18	0.000110431	5.11361	0.016	0.001	1
Wt1	0.000110431	5.03777	0.016	0.001	1
Gtse1	0.000110431	4.84538	0.016	0.001	1
Fam46a	0.000110466	-0.922348	0.254	0.568	1
Ccnt2	0.000111093	1.41409	0.413	0.269	1
Trnau1ap	0.000111666	-0.927698	0.27	0.579	1
Wee1	0.000112167	-3.33075	0	0.194	1
Me1	0.000112272	-0.899874	0.254	0.559	1
Gripap1	0.000112756	-1.96318	0.048	0.273	1
Miga1	0.000113228	-3.25702	0	0.194	1
2810004N23Rik	0.000115281	-0.688178	0.429	0.724	1
Pkig	0.000115902	-0.363527	0.937	0.986	1
Foxj3	0.000116009	1.52323	0.381	0.229	1
Timm13	0.000117771	-0.329586	0.968	0.984	1
Llph	0.000118023	-0.806318	0.206	0.514	1
Zfp992	0.000118682	-3.26793	0	0.193	1
Ppp1r12b	0.00011895	-0.791478	0.413	0.729	1
Hectd1	0.000119569	-0.673554	0.524	0.818	1
Hat1	0.000121839	-1.09197	0.19	0.476	1
Dnajc21	0.000121908	-0.898671	0.19	0.489	1
Emc7	0.000122696	-0.559338	0.508	0.798	1
Efhd2	0.000123523	-0.642857	0.397	0.714	1
Ssr4	0.000123572	-0.481931	0.667	0.904	1
Rora	0.000123703	-0.942621	0.19	0.487	1
Uck2	0.000124644	-2.42713	0.016	0.222	1
Ubxn6	0.000124688	-0.762741	0.429	0.747	1
Trappc2l	0.000124728	-0.47235	0.651	0.923	1
Gpc1	0.000124759	1.12166	0.571	0.462	1
Prkaa2	0.000124968	1.42184	0.492	0.388	1
Obsl1	0.00012576	1.20403	0.571	0.464	1
Acadm	0.000126351	-0.414585	0.825	0.983	1
Pdrg1	0.000126661	-0.607118	0.651	0.842	1
Vangl2	0.000127983	1.85434	0.254	0.117	1
Klhl12	0.00013052	1.86604	0.222	0.094	1
Tmem150a	0.000131346	1.95105	0.222	0.094	1
Ehbp1	0.000131531	0.99078	0.556	0.452	1
Slk	0.000131943	-0.625693	0.381	0.72	1
Lamtor4	0.000132126	-0.443428	0.857	0.952	1
Wtap	0.000133426	1.14382	0.492	0.36	1
Gm32849	0.000135338	-3.47696	0	0.19	1
Clcn4	0.000138416	-0.911752	0.222	0.522	1
Tmem57	0.000139775	-1.27842	0.159	0.424	1
Gaa	0.000140998	0.983863	0.587	0.481	1
Anapc11	0.000141658	0.56881	0.905	0.825	1
Stmn1	0.000143536	-0.893825	0.397	0.707	1
Sirt1	0.00014422	-1.24506	0.111	0.362	1
Cdk5rap1	0.000144491	-3.30389	0	0.189	1
Tmem97	0.000144503	-2.61343	0.016	0.217	1
BC023719	0.000145119	1.83182	0.238	0.105	1
Arl5a	0.000145308	0.616664	0.825	0.775	1
Mrps10	0.000145498	-0.973939	0.222	0.525	1
AC124490.1	0.000145847	-3.27301	0	0.189	1
Lrrc4b	0.000146265	1.63951	0.381	0.235	1
Rnaseh2b	0.000147004	-1.3432	0.063	0.293	1
Adrb1	0.000148082	-1.39625	0.079	0.323	1
Mob1b	0.000148807	1.18956	0.46	0.32	1
Uqcr10	0.000149127	0.288222	1	1	1
Ikzf2	0.00014914	1.75661	0.254	0.119	1
Rad50	0.000149955	-1.24606	0.095	0.348	1
Virma	0.000149988	-3.24755	0	0.188	1
Itsn2	0.000150711	-2.24545	0.032	0.241	1
Arpc2	0.000150986	-0.438137	0.873	0.96	1
Calm3	0.00015162	0.472625	0.952	0.943	1
Pogz	0.000152352	1.82736	0.302	0.162	1
Thoc3	0.000152902	-0.866267	0.19	0.485	1
Tspan2	0.000153255	1.0956	0.556	0.437	1
Sel1l	0.0001538	1.25888	0.476	0.333	1
Abhd16a	0.000154994	-1.09282	0.111	0.366	1
Ryr2	0.000155661	0.456874	0.889	0.897	1
Casq1	0.00015569	2.34431	0.222	0.095	1
Ctsl	0.000157704	-0.41713	0.841	0.964	1
Uty	0.000158434	2.45808	0.19	0.074	1
Nipbl	0.000158809	-0.773883	0.349	0.657	1
Tbx5	0.00015988	1.39931	0.476	0.352	1
Zdhhc2	0.000160689	2.1765	0.159	0.055	1
Plcd4	0.00016071	2.95413	0.095	0.023	1
Pdlim5	0.000160716	0.481562	0.952	0.951	1
Slc12a7	0.000162522	1.9245	0.286	0.15	1
Prps2	0.000163836	2.27404	0.19	0.074	1
Tnfaip8	0.000164776	-1.00598	0.159	0.439	1
Gm21781	0.00016636	3.69754	0.048	0.007	1
Gpc3	0.000167536	1.51111	0.381	0.224	1
Stn1	0.000167715	-3.23387	0	0.186	1
Phb2	0.000168618	-0.443021	0.635	0.907	1
Vgll4	0.000169759	-0.963124	0.19	0.485	1
[truncated: 10,966 more rows]
