# Supplementary material for: Transcriptional Regulation of the Postnatal Cardiac Conduction System Heterogeneity
Source: Research Square preprint supplement (doi:10.21203/rs.3.rs-2925397/v1), 2024-03-06
Supplement: Supplementary file 2 [file 883451f771d67404909f075b.xlsx]

## Sheet: Sheet1
Gene	Forward primer sequence (5’ - 3’)	Reverse primer sequence (5’ - 3’)
Gja1	TCATTAAGTGAAAGAGAGGTGCCC	TGGAGTAGGCTTGGACCTTGTC
Gja5	AAGCAGAAGGCTCGGCCTC	GGAAGCTCCAGTCACCCATCTT
Mpped2	ATGGCACATGGGATTCCTTCT	AGGCATCTGGATACCATCTGTT
Myl2	ATCGACAAGAATGACCTAAGGGA	ATTTTTCACGTTCACTCGTCCT
Myl3	TGCCTCCAAGATTAAGATCGAGT	CTCTGCCTGGGTAGGATTCTG
Myl4	AAGAAACCCGAGCCTAAGAAGG	TGGGTCAAAGGCAGAGTCCT
Myl7	GGCACAACGTGGCTCTTCTAA	TGCAGATGATCCCATCCCTGT
Nppa	ATCTGCCCTCTTGAAAAGCA	ACACACCACAAGGGCTTAGG
Pcp4	AGCTGTGGCCATTCAGTCTC	GTGTCTTCAGGTGGACCAGG
Prdm6	AGCGCATGGAAATCATCCCG	CACTCCCCGTTACGGTTGT
Ryr2	GCGAGCTGGCTACTATGACC	CGTTGCTAATGCTCACGAAA
s100a6	TTCTCGTGGCCATCTTCCAC	GCCAATGGTGAGCTCCTTCT
Scn10a-short	AGCAACCCATTTTCCGTCG	ATGTACAGGCTCTCCTCCCAAT
Shox2	GGAAGAACTTACGGCGTTCG	ACGTGATGGCCTCCTTCTTC
Slit2	CCATGTAAAAATGATGGCACCTG	ATCACAGTCCTGACCCTTGAA
Vsnl1	ACAGCGGGTGGACAAGATTT	GGAAGGGTCGCTTTTTGCAG
