# Supplementary material for: Transcriptional Regulation of the Postnatal Cardiac Conduction System Heterogeneity
Source: Research Square preprint supplement (doi:10.21203/rs.3.rs-2925397/v1), 2024-03-06
Supplement: Supplementary file 3 [file 92acb376ba46ebd01b1a5406.xlsx]

## Sheet: fig5a_supp_mean_auc
	Atf1	Atf3	Atf4	Atf5	Bach1	Bhlhe40	Bptf	Cebpb	Cebpd	Clock	Creb5	Crem	Ctcf	Cux1	Dbp	Ddit3	E2f6	Egr1	Elf1	Elf2	Esrra	Ets2	Etv1	Fos	Fosb	Gata4	Gata6	Gtf3a	Hes1	Hif1a	Hmg20b	Irf1	Irx2	Irx4	Jun	Junb	Jund	Klf10	Klf13	Klf2	Klf4	Klf6	Klf7	Klf9	Mafb	Maff	Mafg	Max	Mef2a
SA node	0.0823443	0.0888649	0.17396	0.154066	0.0682811	0.00959445	0.0495462	0.101779	0.0892955	0.0448641	0.0863001	0.124741	0.0621089	0.047529	0.0658758	0.115656	0.0561703	0.080518	0.0333372	0.0573029	0.377877	0.0917943	0.0491112	0.124636	0.0867059	0.0451043	0.0997189	0.114516	0.117007	0.0342315	0.0120182	0.275215	0.00307913	0.34531	0.0950896	0.0888601	0.0924494	0.0926985	0.0761921	0.106542	0.101768	0.0660724	0.0571075	0.0653636	0.0854977	0.104156	0.0657496	0.0851264	0.0501686
AV node	0.0840541	0.0892272	0.16987	0.138292	0.0655	0.0114062	0.053613	0.0996864	0.0858925	0.0474612	0.093617	0.130853	0.0606609	0.0502673	0.0701384	0.115311	0.0505592	0.077246	0.0367811	0.0591225	0.371763	0.0839737	0.04955	0.12057	0.0856652	0.0492732	0.10237	0.103484	0.11553	0.0373717	0.00442251	0.235762	0.00142311	0.359039	0.093893	0.0878001	0.0927983	0.0892007	0.0744821	0.10376	0.0969922	0.0678021	0.0625428	0.0656263	0.077949	0.104048	0.0689942	0.0798143	0.0524835
Lower nodal bundle	0.0683145	0.085358	0.160637	0.144518	0.0569367	0.0146398	0.0486653	0.0973444	0.0833403	0.0423137	0.0885658	0.133654	0.0560245	0.0478632	0.0711044	0.112496	0.0476125	0.0728745	0.0348015	0.053	0.371082	0.0831699	0.0481536	0.119056	0.0775251	0.0411332	0.0914638	0.109491	0.120451	0.0324244	0.0150941	0.226006	0.000973386	0.354478	0.0911303	0.0849932	0.0889859	0.084921	0.072531	0.0977575	0.0933008	0.0633924	0.0551968	0.0648207	0.0786357	0.0968	0.0631254	0.0763059	0.0483208
His bundle	0.0623005	0.0864896	0.157322	0.137319	0.0565153	0.0153784	0.0537405	0.0991987	0.0842331	0.0477188	0.0845754	0.165768	0.0589142	0.0581753	0.0716513	0.110336	0.0492787	0.0799231	0.034641	0.0562967	0.373478	0.0979912	0.059695	0.124027	0.0850637	0.0416093	0.0811801	0.103709	0.123224	0.0360973	0.00867093	0.240109	0.00923247	0.323633	0.0948361	0.0860933	0.0903353	0.0966609	0.0741929	0.0973225	0.0957373	0.0618838	0.053934	0.0688608	0.0998733	0.0956322	0.0635232	0.0898837	0.0538859
Proximal bundle branch	0.0610431	0.08	0.137917	0.138885	0.0480419	0.011177	0.045596	0.0927289	0.0738933	0.0372234	0.0717224	0.176272	0.0536282	0.0506099	0.0646861	0.0921006	0.0534736	0.0677053	0.0289324	0.0490884	0.39029	0.080059	0.0546599	0.112815	0.0652177	0.0316787	0.0791489	0.107312	0.107128	0.0283221	0.00671356	0.166015	0.020134	0.33376	0.0867891	0.0772079	0.0835335	0.0774911	0.0630213	0.0886364	0.0859851	0.0520898	0.0443042	0.0613405	0.0875399	0.0823641	0.0581895	0.0838943	0.0462546
Distal bundle branch	0.0629311	0.0898256	0.149267	0.130823	0.0578034	0.0131592	0.0507845	0.105329	0.0843324	0.0425879	0.0832736	0.190021	0.0591035	0.0539467	0.0724581	0.109139	0.0564067	0.0759392	0.0382129	0.0556629	0.373131	0.0772574	0.0603145	0.124338	0.0787811	0.0403417	0.0736999	0.105951	0.115825	0.0315007	0.00548628	0.224907	0.0367647	0.300572	0.0956724	0.0871818	0.0924174	0.0936644	0.0725048	0.0973476	0.0936639	0.0599742	0.0524278	0.0696125	0.0945788	0.0970699	0.0650159	0.0945875	0.0507414
Purkinje fibers	0.0687594	0.0862868	0.142248	0.125799	0.0603211	0.0129031	0.0517377	0.102581	0.0832543	0.0432728	0.0715433	0.184618	0.0595252	0.0563676	0.0689195	0.102034	0.0538027	0.0797653	0.0395291	0.053968	0.388191	0.0771825	0.0621361	0.123525	0.0780124	0.0340429	0.0758151	0.107434	0.121743	0.0329988	0.00751947	0.223269	0.0469412	0.316206	0.0956041	0.0847563	0.0891465	0.0913456	0.0735044	0.0954237	0.0937691	0.0580833	0.0474496	0.0692495	0.101468	0.0956889	0.0647798	0.0998308	0.0537265
Contractile cardiomyocytes	0.0712835	0.0747762	0.152369	0.135572	0.057267	0.00948554	0.0427617	0.0835215	0.065279	0.0368813	0.0719462	0.132795	0.0488196	0.0380262	0.0543634	0.0920543	0.046686	0.0632231	0.0299945	0.0475181	0.416204	0.059771	0.0373563	0.102407	0.0586411	0.0293701	0.0993915	0.11245	0.104577	0.024456	0.0144601	0.123232	0.00212526	0.416999	0.0770185	0.0704469	0.0758249	0.0608778	0.0592945	0.0877731	0.085536	0.0542253	0.0410909	0.0517262	0.0616016	0.0795376	0.0544306	0.0641029	0.0393273
[truncated: 48 more columns]
