# Supplementary material for: Transcriptional Regulation of the Postnatal Cardiac Conduction System Heterogeneity
Source: Research Square preprint supplement (doi:10.21203/rs.3.rs-2925397/v1), 2024-03-06
Supplement: Supplementary file 4 [file ab519964125e9b83f39c8e8a.xlsx]

## Sheet: SAN
	SAN vs. RAA	SAN vs. Rest of CCS
Gene Name	Fold Change	Fold Change	P-val
Shox2	2.65179	3.47593	4.17211e-05
Ptchd4	1.56122	2.03473	0.0122688
Cdh12	1.69003	2.19614	0.0345567
Nid2	2.22581	2.22359	0.00744876
Bmp2	4.48352	4.08661	0.000554629
Tbx3	2.50193	2.49057	0.00242361
Gnao1	1.54365	2.33959	0.00387308

## Sheet: cAVN
	cAVN vs. RAA	cAVN vs. Rest of CCS
Gene Name	Fold Change	Fold Change
Lin7a	1.63636	1.77786
Rims1	1.70751	1.61438
Rspo3	1.53409	2.13074
Gcgr	2.61818	3.35565
Scara3	1.98347	1.5331
Ednrb	1.76904	3.6003
Lcp1	2.13439	2.7549
Prdm6	1.82664	2.89711
Hamp	2.95601	3.59596
Shox2	1.63636	1.77048
Pla2r1	1.80564	2.54422
Rd3	2.27087	2.85486
Hs3st3a1	1.73262	1.53159
Sdk2	2.85315	2.65754
Gsg1	1.59214	1.63575
Boc	2.55432	2.09279
Nid2	2.42815	2.29548
Spon1	1.58678	2.95777
Bmp2	4.65734	3.6511
Casq1	2.1442	1.50538
Plppr5	1.90909	1.85048
Znrf1	1.63636	2.09896
Cacna1d	4.50671	4.03697
Sfrp5	2.92823	1.79635
Rgs12	1.59831	2.01388
Gde1	1.8	1.51096
Bambi	1.78512	1.79836
Adk	2.18182	2.25233
Got1	1.67627	1.62586

## Sheet: LNB
	LNB vs. IVS-Base	LNB vs. Rest of CCS
Gene Name	Fold Change	Fold Change	P-val
Hs3st3a1	3.53125	3.15585	7.95265e-05
Lcp1	2.0625	2.08677	0.0316215
Ppp1r17	6.60764	4.18967	2.3571e-07
Dok7	2.21774	2.93134	8.55279e-05
Pirt	1.80125	2.06138	0.0301342
Col4a4	3.52621	1.87288	0.0357716
Cdo1	2.68555	2.16879	0.0082639
Robo1	8.69595	2.39691	0.00833065

## Sheet: HIS
	HIS vs. IVS-Base	HIS vs. Rest of CCS
Gene Name	Fold Change	Fold Change	P-val
Tubb4a	1.7	1.95095	0.044897
Pcp4	9.84375	2.83404	0.00692137
Cdh6	3.14205	2.17642	0.00880955
Cyp4b1	2.46875	2.34085	0.00105736
Scube2	3.62143	1.89969	0.0330046
Grhl1	3.43478	1.90384	0.0484278
Lgi3	2.80556	1.89531	0.0150025
Cpne5	5.82407	1.62134	0.0367589
Gpr22	1.62162	1.67773	0.0172412
Fgf9	1.92593	1.9132	0.0247315

## Sheet: PLBB
	PLBB vs IVS-Base	PLBB vs. rest of CCS
Gene Name	Fold Change	Fold Change	P-val
Igfbp7	2.80288	2.20734	1.33525e-05

## Sheet: PRBB
	PRBB vs IVS-Base	PRBB vs. rest of CCS
Gene Name	Fold Change	Fold Change	P-val
Arxes1	1.85625	2.35173	0.0205896

## Sheet: DLBB
	DLBB vs IVS-Apex	DLBB vs. rest of CCS
Gene Name	Fold Change	Fold Change	P-val
Gal	3.9	2.45024	0.00138261
Nppa	11.3299	6.90576	0.00207488
Mbp	7.9625	3.27706	7.09931e-06
Capn6	3.6	1.83913	0.0224688
Pam	1.89856	1.90127	0.0283917
Col13a1	2.75294	1.92687	0.0140776
Slc16a2	2.47	2.26185	0.00015854
Gm5111	2.42667	2.88281	0.0102463
Rcn3	3.85806	1.8606	0.0429894
Pde10a	2.70833	2.22004	0.00978395
Col5a1	1.54632	1.79595	0.0346606
Ecm1	3.03333	2.46901	0.0103705
Cited1	1.54853	2.25626	0.0389332
Gprin3	9.1	2.1007	0.0101578
Arhgef28	3.10556	1.87427	0.00194606
Sbk2	5.63333	2.88682	0.0302831
Mest	2.55695	3.3749	0.00397663
Hsd17b11	3	1.99883	0.0139556
Rxrg	2.1125	3.05956	0.0018538
Thbs4	5.47857	2.61019	0.00528269
Unc5b	1.96857	2.07366	0.0156823
B2m	1.63091	2.05234	0.0020058
Calr	1.90149	1.87389	0.0185249
Hsp90b1	1.63378	1.79757	0.00896225
Ccdc167	1.50682	2.50729	0.00382784
Cygb	0.791304	0.708929	0.440451
Atp6ap1l	1.84167	1.02387	0.948644
Ptn	5.6875	1.68765	0.0844897

## Sheet: DRBB
	DLBB vs IVS-Apex	DLBB vs. rest of CCS
Gene Name	Fold Change	Fold Change	P-val
Cygb	2.26087	2.39675	0.000144566
Atp6ap1l	3.11458	1.88879	0.0167248
Ptn	6.77083	2.08807	0.0047796

## Sheet: LPF
	LPF vs LENDO	LPF vs. rest of CCS
Gene Name	Fold Change	Fold Change	P-val
Ogn	2.20833	2.58247	0.00179493
Corin	2.0155	2.51704	0.0202141
Abhd13	2.28571	1.99141	0.0157995
Mpped2	6.56	3.09775	0.00175385
Max	1.55556	1.73464	0.013225

## Sheet: RPF
	RPF vs LENDO	RPF vs. rest of CCS
Gene Name	Fold Change	Fold Change	P-val
Sh3d19	2.0672	2.03422	0.0322179
Mylk4	3.60371	3.66899	0.00188938
