# Supplementary material for: Transcriptional Regulation of the Postnatal Cardiac Conduction System Heterogeneity
Source: Research Square preprint supplement (doi:10.21203/rs.3.rs-2925397/v1), 2024-03-06
Supplement: Supplementary file 6 [file cbdd4dfa01662a96d790b7a3.xlsx]

## Sheet: markers_ccs
gene	p_val	avg_log2FC	pct.1	pct.2	p_val_adj	cluster
Rhbdl3	0	11.5638	0.647	0.001	0	SA node
Nme9	1.90524e-89	11.5332	0.059	0	5.91674e-85	SA node
Hamp2	1.90524e-89	10.306	0.059	0	5.91674e-85	SA node
Shox2	0	10.0291	1	0.002	0	SA node
Nr2f1	1.12807e-307	9.71508	0.412	0.001	3.50323e-303	SA node
Gm16321	1.90524e-89	9.70463	0.059	0	5.91674e-85	SA node
C79798	1.90524e-89	9.70407	0.059	0	5.91674e-85	SA node
1810019N24Rik	1.90524e-89	9.69548	0.059	0	5.91674e-85	SA node
Phyhipl	1.90524e-89	9.66439	0.059	0	5.91674e-85	SA node
Elmod1	1.90524e-89	9.66439	0.059	0	5.91674e-85	SA node
Slc25a21	1.90524e-89	9.66439	0.059	0	5.91674e-85	SA node
Sln	0	9.44271	1	0.007	0	SA node
Gm8281	1.90524e-89	9.41506	0.059	0	5.91674e-85	SA node
Gad2	1.90524e-89	9.38645	0.059	0	5.91674e-85	SA node
Gm2974	1.90524e-89	9.38645	0.059	0	5.91674e-85	SA node
Mrap2	1.90524e-89	9.38645	0.059	0	5.91674e-85	SA node
Adam23	1.90524e-89	9.30629	0.059	0	5.91674e-85	SA node
Serpina3a	1.93872e-45	9.22965	0.059	0	6.02071e-41	SA node
Vsnl1	0	9.21469	0.824	0.002	0	SA node
Gm35409	1.90524e-89	9.18239	0.059	0	5.91674e-85	SA node
Gm35281	1.90524e-89	9.15996	0.059	0	5.91674e-85	SA node
Gm47003	1.90524e-89	9.15996	0.059	0	5.91674e-85	SA node
Gm30003	1.93872e-45	9.12337	0.059	0	6.02071e-41	SA node
Ntsr1	6.52676e-114	8.9925	0.176	0.001	2.02688e-109	SA node
4930426D05Rik	4.34761e-89	8.97773	0.118	0	1.35015e-84	SA node
Cav1	0	8.92294	0.824	0.004	0	SA node
Gm3693	1.93872e-45	8.88728	0.059	0	6.02071e-41	SA node
Fam110c	1.06018e-132	8.88312	0.176	0	3.29238e-128	SA node
D030025P21Rik	1.93872e-45	8.80404	0.059	0	6.02071e-41	SA node
Vmn1r5	1.93872e-45	8.78335	0.059	0	6.02071e-41	SA node
Ces2g	1.93872e-45	8.7305	0.059	0	6.02071e-41	SA node
Tns4	1.93872e-45	8.71079	0.059	0	6.02071e-41	SA node
Dchs1	1.66691e-71	8.67331	0.118	0	5.17657e-67	SA node
2310002D06Rik	9.86842e-31	8.63521	0.059	0	3.06464e-26	SA node
Madcam1	4.61114e-89	8.58506	0.118	0	1.43199e-84	SA node
Spata4	2.05648e-45	8.5562	0.059	0	6.38641e-41	SA node
Hist1h2bk	1.74723e-71	8.494	0.118	0	5.42603e-67	SA node
Gm16339	2.05648e-45	8.4718	0.059	0	6.38641e-41	SA node
Pigr	9.86842e-31	8.3953	0.059	0	3.06464e-26	SA node
Kcna6	1.34136e-132	8.36551	0.176	0	4.16559e-128	SA node
D830030K20Rik	1.91964e-71	8.26192	0.118	0	5.96145e-67	SA node
Pde1a	3.58486e-141	8.17191	0.235	0.001	1.11328e-136	SA node
Hoxb4	2.05648e-45	8.12489	0.059	0	6.38641e-41	SA node
Sost	1.06757e-30	8.09471	0.059	0	3.31535e-26	SA node
Fcmr	0	8.07695	0.588	0.003	0	SA node
Gm11789	7.40015e-176	8.07492	0.353	0.002	2.29812e-171	SA node
Gm3636	2.32175e-23	8.06194	0.059	0	7.21021e-19	SA node
2900072N19Rik	1.02642e-30	8.06043	0.059	0	3.18755e-26	SA node
Csmd1	1.83142e-71	8.04582	0.118	0	5.68746e-67	SA node
Gm8066	1.06757e-30	8.01638	0.059	0	3.31535e-26	SA node
Gm7276	2.39126e-23	8.01153	0.059	0	7.42606e-19	SA node
Crtac1	2.32175e-23	7.98973	0.059	0	7.21021e-19	SA node
Cav2	3.33381e-40	7.98174	0.118	0.001	1.03531e-35	SA node
Notum	1.02642e-30	7.92896	0.059	0	3.18755e-26	SA node
Gm7580	2.39126e-23	7.91836	0.059	0	7.42606e-19	SA node
Islr	6.45341e-19	7.89671	0.059	0.001	2.00411e-14	SA node
Ryr3	4.32779e-116	7.86684	0.294	0.002	1.344e-111	SA node
Olfr1250	2.39126e-23	7.79003	0.059	0	7.42606e-19	SA node
Magee2	2.39126e-23	7.78596	0.059	0	7.42606e-19	SA node
Gm37035	2.46283e-23	7.77388	0.059	0	7.64832e-19	SA node
Trim67	4.48843e-45	7.75014	0.118	0.001	1.39388e-40	SA node
Shisa6	2.80448e-50	7.74651	0.176	0.002	8.70932e-46	SA node
Il6	1.06757e-30	7.74462	0.059	0	3.31535e-26	SA node
Esr1	2.10901e-71	7.73955	0.118	0	6.54952e-67	SA node
Mir124-2hg	2.46283e-23	7.73541	0.059	0	7.64832e-19	SA node
Gm10518	2.05648e-45	7.72612	0.059	0	6.38641e-41	SA node
Gm44710	2.39126e-23	7.71913	0.059	0	7.42606e-19	SA node
Slc1a2	3.33381e-40	7.71652	0.118	0.001	1.03531e-35	SA node
Naaladl2	2.2619e-100	7.70252	0.294	0.002	7.02432e-96	SA node
Cr2	1.02642e-30	7.69349	0.059	0	3.18755e-26	SA node
Smpdl3b	6.45341e-19	7.69212	0.059	0.001	2.00411e-14	SA node
Tmeff2	4.76002e-45	7.68568	0.118	0.001	1.47823e-40	SA node
Mag	6.45341e-19	7.6713	0.059	0.001	2.00411e-14	SA node
Gm37867	2.53652e-23	7.62358	0.059	0	7.87716e-19	SA node
Sox3	6.45341e-19	7.61734	0.059	0.001	2.00411e-14	SA node
Nsg1	3.60542e-40	7.59779	0.118	0.001	1.11966e-35	SA node
Lefty2	2.53652e-23	7.59448	0.059	0	7.87716e-19	SA node
Shc2	5.78739e-16	7.57354	0.059	0.001	1.79727e-11	SA node
Fam83c	6.45341e-19	7.54267	0.059	0.001	2.00411e-14	SA node
Hgf	4.47949e-33	7.51432	0.118	0.001	1.39111e-28	SA node
Itgax	5.90238e-16	7.49859	0.059	0.001	1.83298e-11	SA node
Crabp1	2.5587e-51	7.4775	0.118	0.001	7.94605e-47	SA node
Gm19301	6.76524e-19	7.43851	0.059	0.001	2.10094e-14	SA node
Gm2237	3.05637e-12	7.36851	0.059	0.001	9.49157e-08	SA node
Calca	8.57707e-71	7.33313	0.353	0.006	2.66361e-66	SA node
Myl7	5.89357e-16	7.31534	1	0.39	1.83025e-11	SA node
Prr30	3.01159e-12	7.29988	0.059	0.001	9.35248e-08	SA node
Pitx2	1.5934e-153	7.29465	0.412	0.003	4.94831e-149	SA node
Ppp4r4	5.90238e-16	7.28362	0.059	0.001	1.83298e-11	SA node
Tbc1d22bos	6.13916e-16	7.27416	0.059	0.001	1.90651e-11	SA node
Pou6f2	3.16491e-83	7.26652	0.235	0.002	9.82864e-79	SA node
Adgrg6	2.39126e-23	7.25548	0.059	0	7.42606e-19	SA node
Cpa6	6.01962e-16	7.24858	0.059	0.001	1.86939e-11	SA node
Gm16152	2.53652e-23	7.24011	0.059	0	7.87716e-19	SA node
Snph	6.01962e-16	7.23708	0.059	0.001	1.86939e-11	SA node
Dazl	2.57613e-47	7.23179	0.176	0.002	8.00016e-43	SA node
Gm9915	7.78498e-14	7.21795	0.059	0.001	2.41763e-09	SA node
Cyp2j9	6.92668e-19	7.2094	0.059	0.001	2.15108e-14	SA node
Arhgap25	6.92668e-19	7.20276	0.059	0.001	2.15108e-14	SA node
C130026L21Rik	8.05197e-14	7.17448	0.059	0.001	2.50054e-09	SA node
Ramp2	6.01962e-16	7.15362	0.059	0.001	1.86939e-11	SA node
Mrvi1	1.65805e-32	7.13	0.176	0.003	5.14908e-28	SA node
Aldh1a1	1.40303e-61	7.10945	0.176	0.001	4.3571e-57	SA node
Rhov	5.27433e-11	7.09325	0.059	0.001	1.63794e-06	SA node
Scara3	1.48597e-53	7.08103	0.176	0.002	4.61467e-49	SA node
Pik3cd	5.27433e-11	7.06934	0.059	0.001	1.63794e-06	SA node
Gucy1a2	3.05637e-12	7.06273	0.059	0.001	9.49157e-08	SA node
Gm32250	2.53652e-23	7.06075	0.059	0	7.87716e-19	SA node
Gm27042	8.18882e-14	7.05189	0.059	0.001	2.54304e-09	SA node
Hamp	1.11003e-61	7.04506	0.235	0.003	3.4472e-57	SA node
Panct2	6.26103e-16	7.04298	0.059	0.001	1.94436e-11	SA node
Asgr1	6.38529e-16	7.02949	0.059	0.001	1.98295e-11	SA node
Atp2b2	1.87856e-53	6.99937	0.176	0.002	5.83388e-49	SA node
Prdm6	9.41086e-105	6.99541	0.294	0.002	2.92254e-100	SA node
Unc5c	6.92668e-19	6.98255	0.059	0.001	2.15108e-14	SA node
Nr2f2	1.00862e-107	6.97959	0.412	0.005	3.13228e-103	SA node
2810032G03Rik	6.13916e-16	6.97463	0.059	0.001	1.90651e-11	SA node
Amn	5.30059e-10	6.96894	0.059	0.001	1.6461e-05	SA node
Gm6288	8.18882e-14	6.89669	0.059	0.001	2.54304e-09	SA node
Rtn1	4.35759e-28	6.8948	0.118	0.002	1.35325e-23	SA node
Dock11	5.41459e-11	6.86947	0.059	0.001	1.6815e-06	SA node
Pik3r5	3.10181e-12	6.8589	0.059	0.001	9.63268e-08	SA node
Rd3	1.64868e-92	6.82913	0.529	0.01	5.11997e-88	SA node
Clstn2	5.30059e-10	6.7976	0.059	0.001	1.6461e-05	SA node
Abcg4	4.68353e-28	6.79166	0.118	0.002	1.45447e-23	SA node
Tfpi2	7.91737e-14	6.78556	0.059	0.001	2.45874e-09	SA node
Runx2	6.38529e-16	6.77609	0.059	0.001	1.98295e-11	SA node
Ptchd4	8.05197e-14	6.76431	0.059	0.001	2.50054e-09	SA node
Kcnh7	5.30059e-10	6.76123	0.059	0.001	1.6461e-05	SA node
Gcgr	1.11194e-153	6.74867	0.647	0.008	3.45314e-149	SA node
9130015A21Rik	5.48607e-11	6.74412	0.059	0.001	1.7037e-06	SA node
Col6a6	5.63183e-11	6.70529	0.059	0.001	1.74897e-06	SA node
Tsga10ip	2.63178e-30	6.69208	0.118	0.001	8.173e-26	SA node
Capn5	3.29029e-12	6.68844	0.059	0.001	1.0218e-07	SA node
Lyve1	6.26103e-16	6.66761	0.059	0.001	1.94436e-11	SA node
Gm39158	6.38529e-16	6.6576	0.059	0.001	1.98295e-11	SA node
Gm46355	8.46941e-14	6.65083	0.059	0.001	2.63017e-09	SA node
Gm35177	3.29029e-12	6.64442	0.059	0.001	1.0218e-07	SA node
Plscr4	1.67518e-08	6.64273	0.059	0.002	0.000520227	SA node
Cdh12	3.47939e-09	6.63471	0.059	0.001	0.000108053	SA node
Igfbp4	2.80862e-120	6.61694	0.882	0.022	8.72218e-116	SA node
E330013P04Rik	5.70612e-11	6.61312	0.059	0.001	1.77204e-06	SA node
Greb1l	1.67518e-08	6.5871	0.059	0.002	0.000520227	SA node
AC101921.1	3.29029e-12	6.57541	0.059	0.001	1.0218e-07	SA node
4930553P18Rik	8.32795e-14	6.57079	0.059	0.001	2.58624e-09	SA node
Aif1l	9.00678e-74	6.56023	0.353	0.005	2.79705e-69	SA node
Rab27a	3.51696e-09	6.52443	0.059	0.001	0.000109219	SA node
Rab7b	1.21421e-15	6.51732	0.118	0.003	3.77074e-11	SA node
Ednrb	5.57259e-23	6.4927	0.118	0.002	1.73057e-18	SA node
Bmp4	5.99556e-23	6.4876	0.118	0.002	1.86192e-18	SA node
Batf3	2.07564e-32	6.47814	0.176	0.003	6.4459e-28	SA node
Frmpd3	3.29029e-12	6.47175	0.059	0.001	1.0218e-07	SA node
Defb19	5.39801e-07	6.47032	0.059	0.002	0.0167635	SA node
Mybphl	1.5942e-97	6.46753	0.824	0.024	4.95079e-93	SA node
Dchs2	5.78137e-11	6.46538	0.059	0.001	1.79541e-06	SA node
Btbd16	5.35563e-07	6.45142	0.059	0.002	0.0166319	SA node
Rimklb	3.33913e-12	6.42506	0.059	0.001	1.03697e-07	SA node
Rims1	5.66431e-33	6.42301	0.118	0.001	1.75905e-28	SA node
Ptx3	3.51696e-09	6.41939	0.059	0.001	0.000109219	SA node
Trim14	5.8576e-11	6.3896	0.059	0.001	1.81908e-06	SA node
Gap43	3.55492e-09	6.37469	0.059	0.001	0.000110398	SA node
Adamts8	3.84349e-50	6.32185	0.294	0.006	1.1936e-45	SA node
Scube3	3.63204e-09	6.31942	0.059	0.001	0.000112793	SA node
Sfn	3.6712e-09	6.31774	0.059	0.001	0.000114009	SA node
Pstpip2	1.29143e-06	6.30838	0.059	0.002	0.0401055	SA node
Car5a	3.29029e-12	6.29056	0.059	0.001	1.0218e-07	SA node
Hoxb3	3.59328e-09	6.279	0.059	0.001	0.000111589	SA node
Radil	8.70399e-46	6.2764	0.235	0.004	2.70302e-41	SA node
Nexmif	1.34955e-44	6.27629	0.176	0.002	4.19103e-40	SA node
Slc27a3	1.42015e-18	6.27426	0.118	0.003	4.41027e-14	SA node
Kcnh6	3.75078e-09	6.27032	0.059	0.001	0.00011648	SA node
Syt17	3.63204e-09	6.26861	0.059	0.001	0.000112793	SA node
Sh3rf3	2.23287e-24	6.19752	0.118	0.002	6.93418e-20	SA node
Sdk2	1.43925e-36	6.18048	0.235	0.005	4.4696e-32	SA node
Camk1d	2.1643e-24	6.17725	0.118	0.002	6.72123e-20	SA node
Kif27	1.63399e-18	6.17101	0.118	0.003	5.07436e-14	SA node
Loxl3	1.77704e-08	6.13398	0.059	0.002	0.00055186	SA node
Six1	5.52709e-07	6.11313	0.059	0.002	0.0171644	SA node
Lfng	1.31065e-06	6.07014	0.059	0.002	0.0407024	SA node
Mdk	7.12095e-72	6.06888	0.706	0.024	2.21141e-67	SA node
Slc24a4	1.80954e-20	6.06885	0.118	0.002	5.61951e-16	SA node
Cnrip1	6.6416e-23	6.05858	0.118	0.002	2.06255e-18	SA node
Gm44036	5.75701e-10	6.05599	0.059	0.001	1.78784e-05	SA node
Myl4	6.93176e-14	5.99402	1	0.54	2.15266e-09	SA node
Kcnd3	1.73221e-18	5.98417	0.118	0.003	5.37937e-14	SA node
2023-09-05	2.1538e-07	5.98343	0.059	0.002	0.00668864	SA node
Gm30873	6.64757e-08	5.95308	0.059	0.002	0.0020644	SA node
Rell2	6.89324e-08	5.95228	0.059	0.002	0.0021407	SA node
Fzd7	5.63265e-15	5.93801	0.118	0.003	1.74922e-10	SA node
1700022I11Rik	5.70383e-07	5.92915	0.059	0.002	0.0177133	SA node
Tmigd3	5.61479e-07	5.92649	0.059	0.002	0.0174367	SA node
Gm13594	1.89008e-57	5.92487	0.353	0.007	5.86965e-53	SA node
AC154200.1	1.39032e-06	5.88333	0.059	0.002	0.0431765	SA node
Igfbp3	5.74886e-07	5.85344	0.059	0.002	0.0178531	SA node
Gm10549	2.1538e-07	5.83701	0.059	0.002	0.00668864	SA node
Adam33	3.11192e-45	5.82685	0.353	0.009	9.66407e-41	SA node
Gm49064	2.13574e-07	5.80421	0.059	0.002	0.00663254	SA node
Anxa3	1.14661e-17	5.79103	0.118	0.003	3.56079e-13	SA node
Nefl	4.9806e-13	5.78007	0.118	0.004	1.54672e-08	SA node
Acvr1c	3.35411e-23	5.77294	0.176	0.005	1.04162e-18	SA node
Frmpd1	5.31098e-13	5.75427	0.118	0.004	1.64932e-08	SA node
Gria1	2.37432e-80	5.73839	0.412	0.007	7.37345e-76	SA node
Gm47123	5.88602e-07	5.73726	0.059	0.002	0.018279	SA node
Tssk4	1.42139e-06	5.72957	0.059	0.002	0.0441411	SA node
Sncaip	5.79424e-07	5.72314	0.059	0.002	0.017994	SA node
Alox8	1.52817e-42	5.71169	0.294	0.007	4.74574e-38	SA node
Gm10814	5.83996e-07	5.70472	0.059	0.002	0.018136	SA node
Gm24474	5.10205e-13	5.66651	0.118	0.004	1.58444e-08	SA node
Sspnos	5.93244e-07	5.64181	0.059	0.002	0.0184232	SA node
Snai2	6.13143e-11	5.62169	0.118	0.005	1.90411e-06	SA node
Fam181b	1.27296e-38	5.59751	0.294	0.008	3.95317e-34	SA node
Kif6	1.5821e-31	5.52593	0.235	0.006	4.91323e-27	SA node
Hoxb3os	2.7356e-55	5.47235	0.353	0.007	8.4954e-51	SA node
Meis2	1.41763e-06	-3.89291	0	0.663	0.0440245	SA node
Myl3	1.40416e-12	-3.79887	0.882	1	4.36063e-08	SA node
Fosl1	5.80061e-13	5.44524	0.118	0.004	1.80138e-08	SA node
Syt1	2.79685e-25	5.43631	0.176	0.004	8.68563e-21	SA node
Ggt7	6.2407e-15	5.43548	0.118	0.003	1.93805e-10	SA node
Emid1	7.73791e-18	5.41487	0.235	0.011	2.40301e-13	SA node
Nrsn2	7.33632e-21	5.40451	0.176	0.005	2.27829e-16	SA node
Abcb1b	7.01267e-10	5.36172	0.118	0.005	2.17778e-05	SA node
Fam107b	3.52232e-11	5.35114	0.118	0.005	1.09386e-06	SA node
Foxd1	2.19037e-07	5.31271	0.059	0.002	0.0068022	SA node
Myl2	1.27028e-12	-3.65109	0.941	1	3.94487e-08	SA node
Arhgap36	2.50903e-10	5.2843	0.118	0.005	7.79181e-06	SA node
Rab33a	8.39629e-21	5.25356	0.235	0.01	2.60747e-16	SA node
Thbs1	1.11142e-19	5.23194	0.294	0.016	3.45152e-15	SA node
Ano4	5.01137e-14	5.19821	0.176	0.008	1.55628e-09	SA node
Hes7	2.74307e-07	5.1931	0.118	0.008	0.00851861	SA node
Grm4	2.2001e-13	5.19141	0.176	0.009	6.8324e-09	SA node
AC153140.2	7.94503e-10	5.18872	0.118	0.005	2.46733e-05	SA node
Gm4577	7.59024e-09	5.153	0.118	0.006	0.000235715	SA node
Fcho1	1.42017e-10	5.13077	0.118	0.005	4.41034e-06	SA node
Unc80	1.31218e-09	4.99684	0.118	0.006	4.07498e-05	SA node
Myo5b	5.55774e-08	4.9968	0.118	0.007	0.00172596	SA node
Msl3l2	1.47126e-21	4.99348	0.235	0.009	4.569e-17	SA node
Trib3	1.51006e-07	4.95727	0.118	0.007	0.00468949	SA node
Pgf	1.96897e-08	4.9473	0.118	0.006	0.000611463	SA node
Hs6st2	6.37311e-14	4.91994	0.176	0.008	1.97917e-09	SA node
Epdr1	2.61282e-20	4.91413	0.294	0.015	8.11412e-16	SA node
Smim3	1.48837e-18	4.91347	0.235	0.011	4.62212e-14	SA node
Gm47439	3.4023e-07	4.89752	0.118	0.008	0.0105658	SA node
Gata5	8.45893e-18	4.8876	0.294	0.017	2.62692e-13	SA node
Mstn	4.16524e-08	4.88412	0.118	0.007	0.00129352	SA node
Ccl2	1.07468e-23	4.87838	0.235	0.008	3.33742e-19	SA node
Exo1	3.05389e-08	4.86609	0.118	0.007	0.000948385	SA node
Ddit4l	6.10698e-27	4.84273	0.412	0.022	1.89652e-22	SA node
Rgs4	1.54392e-10	4.84175	0.118	0.005	4.79464e-06	SA node
Gnmt	5.95742e-27	4.79293	0.294	0.011	1.85008e-22	SA node
Cacna2d3	8.26507e-22	4.76126	0.294	0.014	2.56672e-17	SA node
Nid2	6.18935e-38	4.74175	0.529	0.026	1.9221e-33	SA node
Gja1	1.32415e-07	-3.44911	0.059	0.793	0.00411215	SA node
Herc6	2.1159e-09	4.74081	0.176	0.013	6.57093e-05	SA node
Rgs10	1.19374e-32	4.73328	0.588	0.038	3.70717e-28	SA node
Mpped2	1.42475e-10	-3.43645	0.176	0.977	4.42457e-06	SA node
Myh8	9.31093e-16	4.71064	0.235	0.013	2.89151e-11	SA node
Stk26	6.24615e-09	4.68261	0.118	0.006	0.000193974	SA node
Gsg1	5.43875e-23	4.6647	0.412	0.026	1.689e-18	SA node
Gm2415	4.63487e-10	4.62219	0.176	0.012	1.43936e-05	SA node
Rassf5	4.78052e-11	4.60296	0.176	0.011	1.48459e-06	SA node
Plcl1	2.60672e-12	4.5803	0.235	0.017	8.09517e-08	SA node
Col22a1	1.8954e-11	4.5756	0.176	0.01	5.88618e-07	SA node
Gng2	1.29676e-21	4.56438	0.588	0.057	4.0271e-17	SA node
Ric3	1.38651e-06	4.55955	0.118	0.008	0.0430581	SA node
Tagln	4.31052e-20	4.53454	0.824	0.138	1.33863e-15	SA node
Enox1	6.2265e-10	4.53115	0.176	0.012	1.93364e-05	SA node
Cited1	4.56832e-10	-3.42502	0.353	0.939	1.41869e-05	SA node
Epor	5.272e-07	4.52915	0.118	0.008	0.0163722	SA node
AC167229.1	1.32437e-06	4.52889	0.118	0.008	0.0411284	SA node
Snca	5.90452e-10	4.50741	0.176	0.012	1.83365e-05	SA node
Prss27	1.03991e-08	4.49093	0.118	0.006	0.000322944	SA node
Bex4	1.67934e-25	4.47683	0.882	0.119	5.2152e-21	SA node
Rspo3	2.47429e-90	4.46548	0.588	0.013	7.68391e-86	SA node
Ddah1	4.72378e-15	4.45481	0.353	0.03	1.46697e-10	SA node
Nfasc	2.64878e-15	4.44448	0.235	0.013	8.22579e-11	SA node
Spon1	1.86115e-18	4.4406	0.529	0.055	5.77981e-14	SA node
4930455G09Rik	1.42796e-08	4.4386	0.235	0.024	0.000443454	SA node
Klc3	7.15552e-07	4.42858	0.118	0.008	0.0222215	SA node
Gadl1	3.16295e-12	4.42463	0.176	0.009	9.82254e-08	SA node
Slitrk5	6.56559e-10	4.3986	0.176	0.012	2.03894e-05	SA node
Tgif1	5.31832e-09	4.37401	0.176	0.013	0.000165161	SA node
Map2	9.57758e-08	4.33245	0.118	0.007	0.00297432	SA node
Adamts5	6.05691e-20	4.31483	0.412	0.03	1.88097e-15	SA node
Fxyd6	1.24663e-10	4.29147	0.235	0.019	3.8714e-06	SA node
Iigp1	3.27213e-37	4.28883	0.471	0.02	1.01616e-32	SA node
Gm47547	9.59949e-21	4.28719	0.588	0.061	2.98112e-16	SA node
Mgp	1.16523e-08	-3.08079	0.353	0.946	0.000361862	SA node
Rxfp1	9.91067e-10	4.28411	0.294	0.032	3.07776e-05	SA node
Clec2l	5.07468e-09	4.26023	0.176	0.013	0.000157594	SA node
Csrp2	6.71793e-13	4.24908	1	0.705	2.08625e-08	SA node
Mb	1.20307e-07	-3.05847	0.647	0.938	0.00373612	SA node
Dscc1	2.61075e-10	4.24658	0.176	0.011	8.10768e-06	SA node
Plppr5	1.78741e-30	4.20346	0.647	0.048	5.55081e-26	SA node
Carmil1	1.21531e-06	4.17804	0.118	0.008	0.0377416	SA node
Fstl4	5.07468e-09	4.14439	0.176	0.013	0.000157594	SA node
Scn7a	3.23898e-09	4.10926	0.176	0.013	0.000100587	SA node
Palmd	1.28171e-21	4.10617	0.529	0.046	3.98036e-17	SA node
Akr1b8	9.2624e-10	4.10337	0.235	0.021	2.87644e-05	SA node
Gm15446	3.08933e-07	4.09915	0.176	0.017	0.00959392	SA node
Slc39a8	7.76012e-21	4.07641	0.647	0.073	2.4099e-16	SA node
Gpr162	6.5533e-08	4.07361	0.176	0.015	0.00203513	SA node
E130018N17Rik	1.50831e-07	4.07122	0.176	0.016	0.00468404	SA node
Elovl6	6.74957e-11	4.03019	0.235	0.019	2.09608e-06	SA node
Bace2	1.64943e-10	4.00015	0.235	0.019	5.1223e-06	SA node
Plpp2	1.31943e-13	3.98824	0.353	0.032	4.09748e-09	SA node
Scd4	4.89385e-13	3.97868	0.353	0.034	1.51978e-08	SA node
Nfkbid	3.06789e-07	3.95933	0.176	0.017	0.00952735	SA node
Zc3hav1	1.37937e-09	3.9433	0.294	0.033	4.28364e-05	SA node
Chaf1b	5.92216e-07	3.91847	0.176	0.017	0.0183913	SA node
Tbx2	8.39157e-13	3.90699	0.235	0.016	2.606e-08	SA node
Mest	1.30909e-06	-3.0165	0.235	0.804	0.0406537	SA node
Ptgis	7.54724e-10	3.90036	0.294	0.032	2.34379e-05	SA node
Colec12	1.41468e-12	3.89724	0.353	0.036	4.39328e-08	SA node
Irx5	1.37603e-08	-2.99654	0.118	0.889	0.000427326	SA node
Cnn1	8.38619e-23	3.88505	0.824	0.115	2.60433e-18	SA node
Etv1	7.60277e-09	-2.84011	0.176	0.922	0.000236104	SA node
Gm29367	4.52671e-07	3.86063	0.176	0.017	0.0140577	SA node
Prss23	1.19586e-12	3.85337	0.412	0.047	3.71374e-08	SA node
Sgsm3	4.99688e-09	3.84687	0.235	0.023	0.000155178	SA node
Kdr	1.24257e-11	3.83941	0.294	0.027	3.85879e-07	SA node
Tesc	2.51735e-09	-2.6735	0.471	0.954	7.81763e-05	SA node
Crip1	2.4739e-08	-2.58653	0.647	0.965	0.000768268	SA node
Lrrc10	3.37883e-07	-2.47243	0.471	0.875	0.0104929	SA node
Enpep	6.05129e-12	3.77843	0.529	0.084	1.87923e-07	SA node
Spats1	3.24648e-11	3.71369	0.294	0.027	1.0082e-06	SA node
St3gal5	4.46502e-14	3.68212	0.412	0.042	1.38661e-09	SA node
Rec114	2.5664e-16	3.67365	0.353	0.026	7.96995e-12	SA node
Ankrd29	1.59724e-09	3.64656	0.235	0.021	4.96024e-05	SA node
Ppp1r1b	1.18241e-09	3.60743	0.294	0.032	3.67198e-05	SA node
Npb	1.78387e-08	3.58999	0.294	0.036	0.00055398	SA node
Bub1b	3.1906e-07	3.58558	0.176	0.016	0.00990841	SA node
Lrrc49	9.95544e-10	3.5796	0.294	0.032	3.09166e-05	SA node
Casp3	1.21446e-12	3.57605	0.588	0.102	3.77151e-08	SA node
Pln	3.28729e-12	-2.39489	1	1	1.02087e-07	SA node
Pcdh7	1.15512e-07	-2.30796	0.235	0.891	0.00358724	SA node
Sgk3	2.76657e-09	3.57305	0.412	0.064	8.5916e-05	SA node
Sulf2	8.13874e-07	-2.18135	0.294	0.864	0.0252748	SA node
Cobl	3.88948e-10	3.54569	0.294	0.031	1.20788e-05	SA node
Gata6	2.79046e-20	3.54353	1	0.21	8.66579e-16	SA node
Bok	2.25842e-09	3.53837	0.412	0.064	7.01353e-05	SA node
Unc13c	8.67317e-14	3.52445	0.471	0.057	2.69345e-09	SA node
Acta2	1.15417e-14	3.49943	1	0.315	3.58427e-10	SA node
Ankrd33b	2.5267e-09	3.47235	0.412	0.066	7.84666e-05	SA node
Maob	1.0629e-07	3.4656	0.294	0.041	0.00330083	SA node
Ptk2b	1.5129e-08	3.36761	0.294	0.036	0.00046983	SA node
Gm15867	4.67334e-07	3.30139	0.235	0.029	0.014513	SA node
Mgst2	1.40923e-06	3.28595	0.235	0.031	0.0437636	SA node
Nes	4.24215e-07	3.245	0.353	0.063	0.013174	SA node
Cdc14b	1.09471e-12	3.22454	0.529	0.077	3.39962e-08	SA node
Mpp6	1.12176e-13	3.22353	0.765	0.158	3.48361e-09	SA node
St8sia2	4.445e-14	3.19457	0.471	0.054	1.3804e-09	SA node
Grip1	3.96632e-08	3.17914	0.294	0.037	0.00123174	SA node
Lockd	1.11241e-07	3.17809	0.294	0.041	0.00345458	SA node
Bmp2	2.24706e-12	3.13201	0.765	0.172	6.97824e-08	SA node
Dock6	1.51206e-07	3.12591	0.294	0.041	0.00469571	SA node
Tst	9.99789e-09	3.11256	0.412	0.069	0.000310484	SA node
Mef2c	9.57097e-20	3.09647	0.941	0.179	2.97226e-15	SA node
Myh7	1.15869e-07	-2.17831	0.765	0.977	0.00359831	SA node
Lgals1	2.92138e-08	-1.97651	0.588	0.959	0.000907235	SA node
Hopx	9.92626e-07	-1.85832	1	0.988	0.030826	SA node
Tsc22d3	1.1375e-07	-1.81092	0.706	0.957	0.00353249	SA node
Lpl	1.22566e-10	-1.68756	0.941	0.996	3.80629e-06	SA node
Metrnl	8.99672e-07	3.09615	0.412	0.085	0.0279393	SA node
Smpx	1.37471e-08	-1.52508	0.824	0.991	0.000426915	SA node
Aspscr1	1.2108e-13	3.06998	1	0.489	3.76014e-09	SA node
Tbx3	3.1933e-11	3.0459	0.647	0.126	9.91679e-07	SA node
Fbln1	3.2563e-13	3.01802	0.941	0.369	1.01124e-08	SA node
Pacs2	9.41681e-07	3.00778	0.294	0.045	0.0292439	SA node
Ednra	2.30077e-07	3.00021	0.353	0.059	0.00714503	SA node
Gstk1	1.04671e-09	2.99792	0.471	0.077	3.25056e-05	SA node
Cd24a	3.51883e-07	2.95967	0.294	0.042	0.0109277	SA node
Trub1	1.28502e-06	2.93135	0.412	0.085	0.0399062	SA node
Traf5	7.09444e-07	2.89325	0.294	0.044	0.0220318	SA node
Slc22a1	2.53005e-10	2.89121	1	0.586	7.85708e-06	SA node
Mcm3	1.41959e-06	2.88827	0.294	0.047	0.0440853	SA node
Plod2	9.41567e-07	2.88598	0.353	0.063	0.0292404	SA node
Gucy1a1	7.25158e-14	2.8606	1	0.343	2.25198e-09	SA node
Slc35d1	3.42032e-07	2.85271	0.353	0.059	0.0106218	SA node
Tbx20	6.72324e-08	2.8395	0.471	0.098	0.0020879	SA node
Pvalb	3.4901e-07	2.82464	0.353	0.06	0.0108385	SA node
Tbcel	4.8652e-07	2.76624	0.412	0.085	0.0151089	SA node
Rcn3	4.16734e-07	2.76407	0.471	0.105	0.0129417	SA node
Snhg18	1.48283e-10	2.7596	0.882	0.297	4.60494e-06	SA node
Ckm	1.14604e-06	-1.33335	0.706	0.995	0.0355903	SA node
Gm49083	4.69748e-08	2.7554	0.529	0.116	0.0014588	SA node
Ccnb2	2.97855e-07	2.70637	0.235	0.028	0.00924988	SA node
Dync2h1	3.68914e-07	2.68891	0.412	0.081	0.0114566	SA node
2610524H06Rik	1.56668e-08	2.67711	0.471	0.086	0.000486533	SA node
Gnao1	3.42678e-10	2.65155	0.765	0.199	1.06419e-05	SA node
Fhl2	1.68593e-10	2.6424	1	0.615	5.23567e-06	SA node
Aldh1b1	2.05162e-09	2.60657	0.824	0.3	6.37131e-05	SA node
Ankrd1	4.72901e-11	2.59315	1	0.528	1.46859e-06	SA node
Fam118a	6.98511e-07	2.49735	0.412	0.079	0.0216923	SA node
Itm2b	5.98231e-09	-1.32772	1	0.999	0.000185781	SA node
Plpp3	2.19931e-07	2.48123	0.706	0.253	0.00682996	SA node
Fam213a	1.56475e-06	2.42566	0.588	0.178	0.0485934	SA node
Snx24	8.2613e-09	2.41005	0.647	0.168	0.000256555	SA node
Tgfb1i1	1.37232e-07	2.391	0.765	0.3	0.00426173	SA node
Gm34030	2.37028e-10	2.38993	1	0.391	7.36092e-06	SA node
Myl9	6.24093e-12	2.34502	1	0.89	1.93812e-07	SA node
Rgs12	1.04164e-08	2.34084	0.765	0.248	0.00032348	SA node
Sfrp5	3.71095e-07	2.27485	0.412	0.078	0.0115243	SA node
Tuba1a	2.00188e-08	2.25291	0.941	0.488	0.000621682	SA node
Rsrc1	9.90975e-11	2.22682	1	0.383	3.07747e-06	SA node
6330403K07Rik	2.73937e-09	2.16922	0.824	0.232	8.50711e-05	SA node
Ctdspl	3.09509e-07	2.16659	0.647	0.183	0.00961181	SA node
Nab1	4.91848e-07	2.12884	0.647	0.196	0.0152743	SA node
Myl12b	6.69343e-08	2.12172	0.882	0.422	0.00207864	SA node
H1fx	5.71811e-09	2.0992	0.647	0.146	0.000177576	SA node
Mob1b	1.1288e-08	2.08755	0.882	0.333	0.000350549	SA node
Dctn6	1.27275e-07	2.05581	0.941	0.57	0.00395254	SA node
Jpt1	6.49335e-07	1.99334	1	0.533	0.0201651	SA node
Gde1	2.71476e-09	1.95606	1	0.595	8.43069e-05	SA node
Reep5	4.98268e-11	1.88843	1	0.825	1.54737e-06	SA node
Arhgap31	4.47577e-08	1.87003	0.941	0.465	0.00138995	SA node
Ldha	1.70017e-09	-1.19536	1	1	5.27989e-05	SA node
Dhrs7	5.22243e-07	1.79275	0.882	0.564	0.0162183	SA node
Adk	4.72973e-08	1.78138	0.941	0.573	0.00146882	SA node
Mlip	1.51766e-06	1.7278	0.941	0.533	0.0471309	SA node
Kif1b	1.46697e-06	1.60139	1	0.572	0.0455567	SA node
Mgst3	8.75067e-09	-1.18082	1	0.996	0.000271752	SA node
Adprhl1	4.4831e-07	-1.12157	1	0.996	0.0139223	SA node
Cpne5	7.40788e-08	1.50492	1	0.736	0.00230052	SA node
Perp	3.95021e-08	1.48517	1	0.869	0.00122674	SA node
Myl6	1.96554e-07	1.46835	0.941	0.921	0.006104	SA node
Crip2	2.60912e-08	-0.755302	1	1	0.000810264	SA node
Ier3	8.55396e-07	1.44959	1	0.771	0.0265643	SA node
Dstn	2.23917e-10	1.41763	1	0.989	6.95373e-06	SA node
Map1b	8.23051e-08	1.41135	1	0.793	0.00255599	SA node
Atp5h	1.19447e-07	-0.512009	1	1	0.00370944	SA node
Pgam2	1.91698e-08	1.38972	1	0.988	0.000595317	SA node
Svil	2.71307e-07	1.37128	1	0.704	0.00842543	SA node
Rbpms	1.82346e-07	1.30266	1	0.986	0.00566276	SA node
Cox7c	1.32457e-06	-0.428433	1	1	0.0411344	SA node
Rtn4	2.85792e-08	1.22658	1	0.966	0.000887526	SA node
Chchd7	1.31438e-06	1.09079	1	0.862	0.040818	SA node
Myoz2	4.98682e-08	1.02122	1	0.97	0.00154866	SA node
Tnnc1	4.3356e-07	0.962846	1	0.984	0.0134642	SA node
Rpl8	7.73872e-08	0.735489	1	1	0.00240326	SA node
Mxra7	1.68756e-06	3.21863	0.235	0.031	0.0524073	SA node
Polr1e	2.07013e-06	2.34801	0.412	0.084	0.0642879	SA node
Dact1	2.15784e-06	2.32846	0.588	0.164	0.0670116	SA node
Rps3a1	2.22075e-06	0.529263	1	1	0.0689652	SA node
Mcm5	2.23664e-06	2.87081	0.294	0.047	0.0694588	SA node
Ndufa7	2.25592e-06	-0.598718	1	1	0.0700577	SA node
Idh2	2.34623e-06	-0.764013	1	1	0.0728621	SA node
Ctsl	2.60403e-06	0.929729	1	0.964	0.0808682	SA node
Fam69c	2.81263e-06	5.99413	0.059	0.002	0.0873461	SA node
Ech1	2.83106e-06	-1.00986	0.941	0.998	0.0879185	SA node
Ankle1	2.83225e-06	6.05723	0.059	0.002	0.0879555	SA node
Ptger4	2.852e-06	5.63134	0.059	0.002	0.0885689	SA node
Cox7a2	2.88495e-06	-0.423769	1	1	0.089592	SA node
Hal	2.93234e-06	5.84936	0.059	0.002	0.0910639	SA node
Ube4bos1	2.93234e-06	5.64867	0.059	0.002	0.0910639	SA node
Ubap1l	2.95277e-06	5.64423	0.059	0.002	0.0916981	SA node
Mvb12b	2.99108e-06	3.01989	0.294	0.049	0.0928881	SA node
Cd34	3.03583e-06	5.58274	0.059	0.002	0.0942776	SA node
Fam114a1	3.09385e-06	3.03597	0.294	0.05	0.0960796	SA node
Gsn	3.1304e-06	-1.8391	0.412	0.856	0.0972144	SA node
Erlin1	3.32017e-06	3.47793	0.235	0.034	0.103108	SA node
Clstn1	3.3391e-06	3.37912	0.294	0.051	0.103696	SA node
Mlf1	3.57823e-06	0.626434	1	0.998	0.111122	SA node
Mcf2l	3.80203e-06	3.39573	0.235	0.034	0.118072	SA node
Zyx	3.8088e-06	1.58929	0.765	0.31	0.118282	SA node
Hmgb2	3.82785e-06	1.24872	0.941	0.483	0.118874	SA node
mt-Cytb	3.86344e-06	-0.6772	1	1	0.119979	SA node
Gm26794	3.86651e-06	4.56488	0.118	0.009	0.120075	SA node
Rab3b	4.18161e-06	5.08608	0.118	0.009	0.12986	SA node
Daam2	4.39523e-06	3.23715	0.294	0.051	0.136494	SA node
Negr1	4.94136e-06	3.77753	0.118	0.009	0.153454	SA node
Tenm4	5.00053e-06	4.96076	0.118	0.01	0.155291	SA node
Nr2c2ap	5.00305e-06	1.74846	0.765	0.298	0.15537	SA node
Tk1	5.02595e-06	2.28536	0.294	0.049	0.156081	SA node
Sema3c	5.39029e-06	-2.93068	0.176	0.712	0.167395	SA node
Eif3h	5.44788e-06	1.21383	0.941	0.956	0.169184	SA node
Sdc4	5.46695e-06	-1.64415	0.706	0.909	0.169776	SA node
Gm12932	5.62674e-06	6.00539	0.059	0.002	0.174738	SA node
Evc	5.62674e-06	5.98571	0.059	0.002	0.174738	SA node
Gabrr2	5.62674e-06	5.85374	0.059	0.002	0.174738	SA node
A830082K12Rik	5.62674e-06	5.72662	0.059	0.002	0.174738	SA node
Popdc2	5.75182e-06	1.16696	0.941	0.722	0.178623	SA node
Tmem151b	5.77638e-06	5.73692	0.059	0.002	0.179386	SA node
Gnb3	5.77638e-06	5.70876	0.059	0.002	0.179386	SA node
Agbl2	5.77638e-06	5.70714	0.059	0.002	0.179386	SA node
Gja5	5.77864e-06	-2.71183	0.176	0.713	0.179456	SA node
Fdx1l	5.81438e-06	5.79729	0.059	0.002	0.180566	SA node
Hs3st3a1	5.81438e-06	5.3451	0.059	0.002	0.180566	SA node
Mrln	5.85263e-06	5.71238	0.059	0.002	0.181753	SA node
Myrip	5.92983e-06	5.45453	0.059	0.002	0.184151	SA node
4932435O22Rik	5.9688e-06	5.57584	0.059	0.002	0.185361	SA node
Dedd	5.97286e-06	2.27628	0.471	0.12	0.185487	SA node
Qpct	5.97569e-06	3.04341	0.294	0.053	0.185575	SA node
Gm42984	6.00801e-06	5.47364	0.059	0.002	0.186579	SA node
Chek1	6.2764e-06	3.72526	0.176	0.02	0.194914	SA node
Npnt	6.94774e-06	3.4664	0.235	0.035	0.215762	SA node
Cdk1	7.13893e-06	1.78225	0.235	0.034	0.221699	SA node
Prdm5	7.54028e-06	2.94647	0.294	0.053	0.234163	SA node
Aplp2	7.5722e-06	1.55845	0.941	0.543	0.235155	SA node
Got1	7.75109e-06	0.862574	1	0.924	0.24071	SA node
Bard1	7.77232e-06	4.17254	0.118	0.01	0.241369	SA node
Coq8a	7.84853e-06	-1.78722	0.353	0.855	0.243736	SA node
Hip1r	7.96452e-06	4.47257	0.118	0.01	0.247338	SA node
Nrip1	8.60631e-06	2.04578	0.647	0.241	0.267269	SA node
Cnn2	8.67057e-06	2.19904	0.471	0.124	0.269264	SA node
Fam69b	8.96398e-06	2.24148	0.471	0.119	0.278376	SA node
Tiparp	9.55324e-06	2.07717	0.824	0.454	0.296676	SA node
Gpi1	9.85521e-06	0.774233	1	0.978	0.306054	SA node
Cabcoco1	1.00159e-05	1.78636	0.824	0.436	0.311044	SA node
B4galt5	1.00818e-05	2.79555	0.294	0.053	0.313091	SA node
2610318N02Rik	1.02208e-05	6.28664	0.059	0.003	0.317407	SA node
Gm47061	1.02846e-05	6.09164	0.059	0.003	0.319389	SA node
Galnt16	1.02846e-05	6.00674	0.059	0.003	0.319389	SA node
Arl5c	1.0633e-05	3.64251	0.176	0.021	0.330209	SA node
Ppp1r3g	1.08091e-05	5.4721	0.059	0.003	0.335676	SA node
Irx2	1.09004e-05	-2.27835	0.235	0.768	0.338512	SA node
Tmem72	1.12191e-05	5.50158	0.059	0.003	0.348409	SA node
Mab21l3	1.1359e-05	5.39108	0.059	0.003	0.352755	SA node
Bambi	1.15375e-05	1.72864	0.941	0.583	0.358298	SA node
Fth1	1.15678e-05	-0.438988	1	1	0.359239	SA node
Panx1	1.15875e-05	3.26624	0.176	0.021	0.359849	SA node
Cdca7	1.19116e-05	3.61601	0.176	0.021	0.369913	SA node
Epha5	1.24818e-05	3.50221	0.176	0.021	0.387621	SA node
Txnip	1.30498e-05	-1.47116	0.882	0.947	0.40526	SA node
Eef1g	1.3142e-05	0.90511	1	0.934	0.408126	SA node
Csdc2	1.31478e-05	2.74039	0.294	0.054	0.408304	SA node
Srgap3	1.35412e-05	4.40876	0.118	0.01	0.420522	SA node
Gm12216	1.40213e-05	4.29652	0.118	0.01	0.435431	SA node
Smyd2	1.49127e-05	-2.82851	0.118	0.645	0.463113	SA node
Cpox	1.49932e-05	2.05723	0.588	0.185	0.465614	SA node
Rpl17	1.50617e-05	0.74856	1	0.995	0.467742	SA node
Gm48551	1.61087e-05	4.31931	0.118	0.01	0.500255	SA node
Mid1	1.66247e-05	3.66493	0.176	0.022	0.516279	SA node
Cyp2u1	1.68842e-05	2.45747	0.353	0.076	0.524338	SA node
Lpgat1	1.6918e-05	-1.64466	0.471	0.878	0.525387	SA node
6030407O03Rik	1.72524e-05	4.16456	0.118	0.01	0.535774	SA node
Gabre	1.78248e-05	5.99016	0.059	0.003	0.55355	SA node
Timp3	1.83353e-05	1.08787	0.941	0.76	0.569404	SA node
Mtmr2	1.86599e-05	2.15196	0.471	0.132	0.579483	SA node
Cdk6	1.92284e-05	2.20575	0.412	0.101	0.597137	SA node
AC163032.1	1.9415e-05	3.24769	0.235	0.038	0.602934	SA node
Il13ra1	2.04462e-05	3.10074	0.235	0.038	0.634958	SA node
Vldlr	2.16867e-05	1.4485	0.706	0.261	0.673479	SA node
Rabgap1l	2.1728e-05	-1.63035	0.471	0.863	0.674764	SA node
Rbpms2	2.1818e-05	1.64197	0.824	0.495	0.677557	SA node
Rad51ap2	2.25808e-05	4.75704	0.118	0.011	0.701248	SA node
Kcnj5	2.40003e-05	1.90701	0.706	0.322	0.74533	SA node
Uqcrq	2.44717e-05	-0.553068	1	1	0.759968	SA node
Flrt3	2.48743e-05	2.94183	0.294	0.058	0.772472	SA node
Itpk1	2.52604e-05	2.49719	0.294	0.055	0.784463	SA node
Scn5a	2.54243e-05	-1.78546	0.353	0.807	0.789551	SA node
Dennd2a	2.57627e-05	3.9531	0.118	0.011	0.80006	SA node
Irx3	2.59652e-05	-2.02731	0.176	0.748	0.806348	SA node
Rps15a	2.69841e-05	0.49991	1	1	0.837991	SA node
Snta1	2.70264e-05	-2.1504	0.235	0.706	0.839304	SA node
Rassf10	2.71717e-05	4.32936	0.118	0.011	0.843818	SA node
Gpx4	2.74557e-05	-0.529016	1	0.999	0.852636	SA node
Serf2	2.75748e-05	-0.518374	1	1	0.856335	SA node
Bicd1	2.77198e-05	2.62484	0.294	0.057	0.860837	SA node
Clu	2.78473e-05	1.57632	0.824	0.554	0.864797	SA node
Samd14	2.81079e-05	3.31645	0.235	0.039	0.87289	SA node
Maged2	2.82973e-05	1.44774	0.941	0.636	0.878773	SA node
Dag1	2.83784e-05	-1.45786	0.471	0.858	0.88129	SA node
Tspan18	2.9391e-05	1.94566	0.647	0.267	0.912737	SA node
Igsf23	2.95148e-05	6.18637	0.059	0.003	0.916584	SA node
Gm29015	2.98492e-05	5.7697	0.059	0.003	0.926967	SA node
Meg3	3.05199e-05	-1.59321	0.647	0.898	0.947795	SA node
Slit2	3.05319e-05	-2.3852	0.176	0.704	0.948167	SA node
Gng11	3.05781e-05	2.20834	0.647	0.251	0.949603	SA node
Unc79	3.13988e-05	5.45591	0.059	0.003	0.97509	SA node
Dnajc27	3.17728e-05	3.33169	0.235	0.041	0.986703	SA node
Car2	3.25399e-05	4.22754	0.118	0.011	1	SA node
Adssl1	3.25583e-05	-1.49144	0.412	0.858	1	SA node
Hcfc1r1	3.35361e-05	-0.811726	1	0.989	1	SA node
Oxct1	3.58077e-05	1.40897	0.882	0.613	1	SA node
Tmsb10	3.63191e-05	0.810567	1	0.97	1	SA node
Ssr3	3.63635e-05	1.44285	0.824	0.595	1	SA node
Fzd1	3.69479e-05	2.48498	0.353	0.083	1	SA node
Trim2	3.8203e-05	2.13711	0.412	0.104	1	SA node
Arid5b	4.10674e-05	1.35277	0.941	0.595	1	SA node
Vcl	4.21518e-05	2.13946	0.588	0.204	1	SA node
Rps13	4.56741e-05	0.49525	1	1	1	SA node
Corin	4.65455e-05	-2.82994	0.118	0.609	1	SA node
Trpc3	4.67283e-05	5.80962	0.059	0.003	1	SA node
Atp5o	4.72335e-05	5.74845	0.059	0.003	1	SA node
Gm10827	4.74881e-05	5.70286	0.059	0.003	1	SA node
Gm17399	4.74881e-05	5.69621	0.059	0.003	1	SA node
Nova2	4.87804e-05	5.39172	0.059	0.003	1	SA node
Hcn4	4.89852e-05	1.96804	0.706	0.362	1	SA node
AC164424.1	4.90428e-05	5.61449	0.059	0.003	1	SA node
Gm15543	4.93918e-05	-1.8107	0.294	0.785	1	SA node
Epb41l2	4.94264e-05	1.8181	0.529	0.168	1	SA node
Tonsl	4.95494e-05	3.87999	0.118	0.011	1	SA node
Etnk2	4.95717e-05	5.3381	0.059	0.003	1	SA node
Cdh8	5.0106e-05	5.35885	0.059	0.003	1	SA node
Lrrn2	5.02091e-05	2.38666	0.353	0.086	1	SA node
Fgf1	5.05323e-05	-2.46644	0.176	0.641	1	SA node
Zfp608	5.05906e-05	2.24825	0.471	0.135	1	SA node
Dpy19l1	5.06304e-05	2.66236	0.294	0.06	1	SA node
Smc1b	5.06457e-05	4.97563	0.059	0.003	1	SA node
Tmtc2	5.0727e-05	4.13975	0.118	0.012	1	SA node
Dsp	5.10239e-05	-1.47655	0.353	0.808	1	SA node
Rpl13	5.11422e-05	0.473711	1	1	1	SA node
Npy	5.11909e-05	5.18547	0.059	0.003	1	SA node
Galnt14	5.14656e-05	5.28066	0.059	0.003	1	SA node
Vcan	5.15155e-05	-1.39158	0.471	0.884	1	SA node
Fkbp11	5.15319e-05	2.97617	0.235	0.041	1	SA node
Gsdme	5.57155e-05	3.01981	0.235	0.042	1	SA node
Tmem136	5.77584e-05	3.03623	0.235	0.042	1	SA node
Pebp1	5.91975e-05	-0.653436	1	0.999	1	SA node
Abcc8	5.99264e-05	4.05226	0.118	0.012	1	SA node
Dyx1c1	6.06433e-05	3.76101	0.118	0.012	1	SA node
Sparcl1	6.10628e-05	-1.83576	0.588	0.842	1	SA node
Stk11ip	6.10753e-05	2.78432	0.235	0.04	1	SA node
Crat	6.14155e-05	-1.54584	0.471	0.807	1	SA node
Gm30074	6.39284e-05	2.79179	0.235	0.041	1	SA node
Ptn	6.55038e-05	2.53534	0.412	0.112	1	SA node
Tpm2	6.59153e-05	2.60994	0.412	0.122	1	SA node
Cdh24	6.64027e-05	4.19773	0.118	0.012	1	SA node
Gm33195	6.8445e-05	3.47117	0.176	0.025	1	SA node
Pir	7.1584e-05	3.14639	0.235	0.043	1	SA node
Ezr	7.33844e-05	-0.972134	0.941	0.974	1	SA node
Atp2a2	7.33951e-05	0.698026	1	0.998	1	SA node
Lef1	7.37546e-05	5.47782	0.059	0.003	1	SA node
Hdgfl3	7.37763e-05	1.58107	0.706	0.314	1	SA node
Skap2	7.5219e-05	2.68509	0.294	0.063	1	SA node
Zfp330	7.68803e-05	1.30684	0.824	0.365	1	SA node
Cx3cl1	7.7635e-05	5.35241	0.059	0.003	1	SA node
Arhgef26	7.84339e-05	5.10396	0.059	0.003	1	SA node
Gm14862	7.92406e-05	5.0744	0.059	0.003	1	SA node
Limch1	7.9418e-05	-2.25613	0.235	0.667	1	SA node
mt-Co2	7.96565e-05	-0.498055	1	1	1	SA node
Cmtm3	8.04414e-05	3.93455	0.118	0.012	1	SA node
Shmt1	8.36812e-05	3.55913	0.176	0.026	1	SA node
Cox4i2	8.48151e-05	3.02236	0.176	0.025	1	SA node
Tmem74b	8.48743e-05	3.81629	0.118	0.012	1	SA node
Cmc1	8.87677e-05	1.12029	0.941	0.603	1	SA node
Nppa	9.16991e-05	-6.03938	0.294	0.68	1	SA node
Tcap	9.18868e-05	0.844004	1	0.998	1	SA node
Col4a6	9.20848e-05	2.3399	0.353	0.089	1	SA node
Sphkap	9.36832e-05	2.23637	0.353	0.087	1	SA node
mt-Nd3	9.41295e-05	-0.81289	0.941	0.991	1	SA node
Slco3a1	9.46019e-05	-1.53937	0.588	0.837	1	SA node
Tnnt2	9.76043e-05	0.418364	1	1	1	SA node
Igfbpl1	9.93049e-05	3.61779	0.235	0.045	1	SA node
Abcc9	9.96192e-05	-2.73661	0.118	0.579	1	SA node
Prkaca	0.00010073	-1.22142	0.647	0.873	1	SA node
Cavin3	0.000102055	2.30846	0.471	0.154	1	SA node
Mrpl33	0.000102719	-0.646712	1	0.992	1	SA node
Dnmbp	0.000102791	2.94508	0.235	0.044	1	SA node
Gm20443	0.000104688	5.71631	0.059	0.003	1	SA node
Kctd8	0.000104755	2.46444	0.294	0.064	1	SA node
Fam13c	0.000107755	4.46535	0.118	0.013	1	SA node
Mdp1	0.000110294	-0.980382	0.824	0.948	1	SA node
Pgm1	0.000110513	5.22813	0.059	0.003	1	SA node
Sox5	0.000113818	5.02172	0.059	0.003	1	SA node
Sema3a	0.000114121	-2.80565	0.118	0.574	1	SA node
Nmt2	0.000114293	2.32856	0.412	0.118	1	SA node
Hist1h2bg	0.000114378	4.99896	0.059	0.003	1	SA node
Frem1	0.000115505	4.95115	0.059	0.003	1	SA node
Gm15860	0.000115877	2.32097	0.353	0.089	1	SA node
Cox6c	0.000116138	-0.36832	1	1	1	SA node
Ccdc25	0.000116865	1.591	0.706	0.338	1	SA node
Asb7	0.000118276	2.22588	0.353	0.086	1	SA node
Mns1	0.000121145	3.87539	0.118	0.013	1	SA node
Zfp36l1	0.0001218	1.05891	0.941	0.699	1	SA node
mt-Nd2	0.000122041	-0.547594	1	1	1	SA node
Pcdh11x	0.000123869	2.89434	0.176	0.026	1	SA node
mt-Nd4	0.000125379	-0.479307	1	1	1	SA node
Lrrc39	0.000126644	-1.79381	0.235	0.701	1	SA node
Socs1	0.00012683	3.02752	0.353	0.09	1	SA node
Cystm1	0.000126974	-1.36959	0.647	0.847	1	SA node
Tmeff1	0.000127264	3.0433	0.176	0.026	1	SA node
Arxes2	0.000127686	2.14763	0.353	0.086	1	SA node
Rrad	0.000139595	1.14185	1	0.976	1	SA node
Prickle2	0.000141519	4.29585	0.118	0.013	1	SA node
Gm15261	0.000143299	4.28497	0.118	0.013	1	SA node
Hrasls	0.000144058	3.72593	0.176	0.027	1	SA node
Brip1	0.000149208	3.68294	0.118	0.013	1	SA node
Rhox5	0.000153767	4.99844	0.059	0.004	1	SA node
Slc24a3	0.000154495	5.40502	0.059	0.004	1	SA node
Inhba	0.000154495	5.00655	0.059	0.004	1	SA node
Slc16a12	0.000155205	-1.91342	0.176	0.673	1	SA node
Cd3e	0.000155227	5.11171	0.059	0.004	1	SA node
Pcsk1n	0.000158186	5.17088	0.059	0.004	1	SA node
Dynlrb2	0.000163492	4.95931	0.059	0.004	1	SA node
Kcnrg	0.000164263	4.9669	0.059	0.004	1	SA node
Ppp1r15b	0.000168368	2.4385	0.353	0.097	1	SA node
Mfap4	0.00017573	3.49361	0.176	0.027	1	SA node
Samhd1	0.000176152	2.08113	0.412	0.124	1	SA node
Mpp1	0.00017637	2.66921	0.294	0.066	1	SA node
Rapgef4	0.000178465	3.31043	0.176	0.027	1	SA node
Ahnak	0.00018834	-1.53	0.412	0.794	1	SA node
Phf1	0.00019322	2.4314	0.294	0.066	1	SA node
Macrod1	0.000194722	-1.67578	0.235	0.726	1	SA node
Sorcs2	0.000194819	-2.36433	0.118	0.585	1	SA node
Lpar4	0.000195245	2.60429	0.294	0.07	1	SA node
Tex261	0.000197156	1.23516	0.882	0.569	1	SA node
Gm9493	0.0001985	1.70357	0.588	0.233	1	SA node
Mad1l1	0.000204888	3.13634	0.235	0.047	1	SA node
Qprt	0.000209444	3.73076	0.118	0.013	1	SA node
Bphl	0.000213188	-2.71759	0.059	0.521	1	SA node
Gm26606	0.000213522	5.25105	0.059	0.004	1	SA node
Ccdc89	0.000214495	5.39875	0.059	0.004	1	SA node
Pot1b	0.000214804	3.91471	0.118	0.013	1	SA node
Ccser2	0.000216265	-0.837536	0.941	0.96	1	SA node
Zfp811	0.000217437	5.28996	0.059	0.004	1	SA node
Chkb	0.000221304	2.01293	0.412	0.122	1	SA node
Stx11	0.000223499	2.51866	0.294	0.069	1	SA node
Cebpd	0.000226389	1.26892	0.882	0.504	1	SA node
Pfkfb1	0.00022752	5.00731	0.059	0.004	1	SA node
Pard3bos1	0.000229588	4.98029	0.059	0.004	1	SA node
Fdps	0.000229724	-1.99466	0.294	0.703	1	SA node
Bach1	0.00023354	2.09123	0.588	0.225	1	SA node
Rpl15	0.000233892	0.419103	1	1	1	SA node
Ndufa1	0.000234004	-0.613382	1	0.999	1	SA node
Fbxw7	0.000234856	1.67968	0.588	0.231	1	SA node
Stmn1	0.000243785	1.73803	0.941	0.729	1	SA node
Igsf10	0.000243981	3.17253	0.176	0.028	1	SA node
Shisa2	0.000245314	2.74052	0.294	0.069	1	SA node
H3f3a	0.000251656	-0.405325	1	1	1	SA node
Sparc	0.000256275	-0.767453	1	0.997	1	SA node
Tvp23bos	0.000265895	3.8279	0.118	0.014	1	SA node
Rpl22l1	0.000268549	1.02411	1	0.93	1	SA node
Calm2	0.000272419	0.978543	0.941	0.837	1	SA node
Pde7a	0.000276281	2.52848	0.294	0.071	1	SA node
Anxa2	0.000278462	-1.62485	0.353	0.716	1	SA node
Pmm1	0.000280378	1.79536	0.529	0.202	1	SA node
Slc4a8	0.00028704	5.36282	0.059	0.004	1	SA node
Ccdc24	0.000289564	5.2224	0.059	0.004	1	SA node
Vim	0.000289887	2.02589	0.647	0.296	1	SA node
Cotl1	0.000290075	3.10358	0.176	0.029	1	SA node
Atp5g2	0.000292221	-0.378256	1	1	1	SA node
Gm16712	0.000297261	5.14182	0.059	0.004	1	SA node
Atp6v1g1	0.000297957	-0.588229	1	0.994	1	SA node
Marcksl1	0.000303255	1.5412	0.647	0.26	1	SA node
Lamb3	0.000304379	-2.28156	0.235	0.657	1	SA node
Gm29417	0.000307822	4.92467	0.059	0.004	1	SA node
Rpl5	0.000309749	0.50601	1	0.998	1	SA node
Wdr47	0.000309802	2.24905	0.294	0.068	1	SA node
Klhl23	0.000310891	1.19658	0.765	0.451	1	SA node
Mmp14	0.000312581	2.83465	0.353	0.103	1	SA node
Gm1673	0.000312827	1.2032	0.882	0.551	1	SA node
Hist1h2bb	0.000313233	4.72111	0.059	0.004	1	SA node
Rpl21	0.000315789	1.10988	1	0.833	1	SA node
Tpm1	0.00032304	-0.374767	1	1	1	SA node
mt-Nd5	0.000323955	-0.606611	1	1	1	SA node
Tulp4	0.000324927	-1.59893	0.294	0.726	1	SA node
Tgfb2	0.000327697	1.94145	0.647	0.301	1	SA node
Acadm	0.000334634	-0.775913	0.941	0.98	1	SA node
A230057D06Rik	0.000334639	3.73456	0.118	0.014	1	SA node
Irx1	0.000334754	-2.44475	0.118	0.561	1	SA node
Art1	0.000335517	-3.3206	0	0.462	1	SA node
Ckmt2	0.00033855	-3.02233	0.059	0.513	1	SA node
Pola1	0.000341553	2.64797	0.235	0.048	1	SA node
Psen1	0.000342357	2.035	0.412	0.132	1	SA node
Limd1	0.000346683	1.37304	0.706	0.341	1	SA node
Rps19	0.000348369	0.598271	1	0.998	1	SA node
Akap12	0.000349484	3.46697	0.118	0.014	1	SA node
Mical2	0.00036767	1.88625	0.588	0.258	1	SA node
1700001P01Rik	0.000376431	5.37645	0.059	0.004	1	SA node
Ube2dnl2	0.000378025	5.29539	0.059	0.004	1	SA node
Slbp	0.000381711	1.7725	0.588	0.251	1	SA node
Rack1	0.000388097	0.617341	1	0.991	1	SA node
Fbxl22	0.000395974	0.991391	1	0.833	1	SA node
Cenps	0.000397276	2.54476	0.294	0.076	1	SA node
Man1a2	0.000397695	-1.72967	0.294	0.691	1	SA node
Rps15	0.000400205	0.574676	1	0.998	1	SA node
Cidea	0.000400308	-1.7136	0.294	0.699	1	SA node
Kank3	0.000404767	2.99797	0.235	0.051	1	SA node
Gpx3	0.000407175	0.845617	0.941	0.707	1	SA node
Stard10	0.000419124	-0.866755	0.824	0.968	1	SA node
Arhgef25	0.000427516	2.23221	0.353	0.103	1	SA node
Arl5a	0.000430022	-1.4637	0.353	0.752	1	SA node
Eno1	0.000435152	1.10141	0.882	0.615	1	SA node
Htra4	0.000458809	3.44506	0.118	0.014	1	SA node
Maoa	0.000460347	2.68792	0.235	0.05	1	SA node
Nme7	0.000466293	1.47112	0.529	0.182	1	SA node
Ppic	0.000468582	1.09966	0.824	0.502	1	SA node
Trim63	0.000469829	0.764244	1	0.866	1	SA node
Cdca8	0.000480291	1.16226	0.176	0.03	1	SA node
Dgat2	0.000494878	-3.0045	0	0.444	1	SA node
Gm26521	0.000523786	4.8783	0.059	0.004	1	SA node
4930570G19Rik	0.000532361	4.83156	0.059	0.004	1	SA node
Nsg2	0.000537055	-2.53	0.118	0.539	1	SA node
Prdm1	0.000538878	4.72583	0.059	0.004	1	SA node
Gm39318	0.000541067	4.76332	0.059	0.004	1	SA node
Gm26522	0.000541067	4.73978	0.059	0.004	1	SA node
Hebp1	0.000554464	1.62655	0.706	0.412	1	SA node
Xirp2	0.000557049	-1.71311	0.412	0.763	1	SA node
Bicc1	0.000563427	3.39923	0.176	0.032	1	SA node
Rc3h2	0.000564414	1.29905	0.647	0.272	1	SA node
Arl4d	0.000565419	2.76574	0.235	0.053	1	SA node
Mrps28	0.000578489	-1.27399	0.412	0.793	1	SA node
Oat	0.000598645	1.15762	0.941	0.651	1	SA node
Nap1l1	0.000626623	0.832902	1	0.794	1	SA node
Dok2	0.000633893	5.27753	0.059	0.004	1	SA node
Gm9484	0.000633893	5.19501	0.059	0.004	1	SA node
Hspa2	0.000643292	1.30624	0.588	0.229	1	SA node
Cd59a	0.000644109	-1.05431	0.412	0.797	1	SA node
Kalrn	0.000655003	2.37194	0.294	0.077	1	SA node
Lncpint	0.000663189	3.49893	0.176	0.032	1	SA node
Gm17634	0.000664547	4.83478	0.059	0.004	1	SA node
2810429I04Rik	0.000672423	4.89897	0.059	0.004	1	SA node
Pdlim3	0.000678715	1.30019	0.882	0.554	1	SA node
Fam174b	0.00067928	-1.34507	0.353	0.768	1	SA node
Fanca	0.000683059	4.91413	0.059	0.004	1	SA node
Cpsf4	0.000687844	2.32922	0.294	0.078	1	SA node
Sema7a	0.000691139	4.67824	0.059	0.004	1	SA node
Tm6sf1	0.000710948	1.32466	0.588	0.23	1	SA node
Slc2a1	0.000713403	2.45156	0.412	0.138	1	SA node
Tmem165	0.000735811	1.02472	0.824	0.477	1	SA node
Scn10a	0.000736841	-1.92583	0.118	0.589	1	SA node
Prkra	0.000746783	1.26498	0.706	0.318	1	SA node
Bclaf3	0.000751076	2.60462	0.294	0.079	1	SA node
mt-Co3	0.000752517	-0.337268	1	1	1	SA node
Mturn	0.000757162	2.57894	0.294	0.078	1	SA node
Prrx2	0.000761287	-1.92157	0.118	0.581	1	SA node
Scn1b	0.000773499	2.91383	0.176	0.032	1	SA node
B230217C12Rik	0.00077833	3.74581	0.118	0.016	1	SA node
Zfp641	0.000787915	3.833	0.118	0.016	1	SA node
Phyh	0.000799989	0.8099	1	0.814	1	SA node
Prim2	0.000806728	2.79211	0.176	0.032	1	SA node
4833413G10Rik	0.000808836	5.11424	0.059	0.004	1	SA node
Cdon	0.000812577	2.28161	0.353	0.104	1	SA node
Klf2	0.000821335	1.56973	0.824	0.618	1	SA node
Gcnt1	0.000824836	3.06877	0.176	0.033	1	SA node
Me1	0.000826706	1.05229	0.882	0.559	1	SA node
Lypd1	0.000827531	4.93771	0.059	0.004	1	SA node
Rab3a	0.000834572	-1.38368	0.412	0.733	1	SA node
Mthfd1	0.000837083	2.33058	0.294	0.078	1	SA node
Igfbp5	0.000843528	1.17459	1	0.877	1	SA node
Mctp2	0.000849849	4.75224	0.059	0.004	1	SA node
Shank2	0.000853083	4.81423	0.059	0.004	1	SA node
Sntg2	0.000859584	4.60487	0.059	0.004	1	SA node
Cd109	0.000862852	4.82746	0.059	0.004	1	SA node
Ankrd45	0.00086488	3.63596	0.118	0.016	1	SA node
Col18a1	0.000866131	4.32034	0.059	0.004	1	SA node
Gm48742	0.000869422	4.81002	0.059	0.004	1	SA node
Des	0.000874221	0.535564	1	0.993	1	SA node
Tjp3	0.000876038	4.83977	0.059	0.004	1	SA node
Gm31728	0.000876038	4.59121	0.059	0.004	1	SA node
Angpt1	0.000876931	-3.47442	0	0.418	1	SA node
Gfod1	0.000879506	1.96333	0.412	0.139	1	SA node
Srrd	0.00089321	1.9706	0.412	0.148	1	SA node
Pcdh18	0.000893731	2.51913	0.235	0.054	1	SA node
Il6st	0.000904891	1.22779	0.647	0.275	1	SA node
Plekhg3	0.000906304	3.46038	0.118	0.016	1	SA node
Rab2a	0.000910237	0.646377	1	0.975	1	SA node
H3f3b	0.000911123	0.600863	1	0.997	1	SA node
Plcb1	0.000916635	3.08082	0.176	0.034	1	SA node
Dcbld2	0.000927272	2.26793	0.294	0.08	1	SA node
Mdga1	0.000930518	1.91075	0.353	0.105	1	SA node
Tmem147	0.000931022	-0.916963	0.706	0.904	1	SA node
Gpd1l	0.000959109	2.16961	0.294	0.077	1	SA node
Mospd1	0.000971857	1.78405	0.529	0.24	1	SA node
Reep2	0.00097364	3.45614	0.118	0.016	1	SA node
Zfp704	0.000990937	1.3248	0.588	0.27	1	SA node
Pdlim4	0.000993352	1.38003	0.647	0.287	1	SA node
Rrm1	0.000993857	1.86775	0.471	0.176	1	SA node
Hnrnpf	0.000994621	0.74977	0.941	0.871	1	SA node
Arhgap10	0.00100125	1.31818	0.706	0.437	1	SA node
Hrc	0.00103591	-0.948829	0.765	0.887	1	SA node
Dcaf15	0.00103631	2.22818	0.353	0.107	1	SA node
Rtn2	0.00103756	-1.7188	0.235	0.617	1	SA node
Cacnb2	0.00103974	1.59611	0.529	0.21	1	SA node
E430024I08Rik	0.00104727	2.60623	0.235	0.055	1	SA node
Fam20c	0.00105299	1.80654	0.412	0.141	1	SA node
Dok7	0.00105585	3.37924	0.176	0.034	1	SA node
Kif3a	0.00106234	1.43397	0.588	0.237	1	SA node
Tnnt1	0.00106562	-1.57942	0.353	0.704	1	SA node
Fndc5	0.0010791	-2.16283	0.118	0.54	1	SA node
Eci1	0.00108951	-0.72822	1	0.956	1	SA node
Fbxl4	0.00110165	2.50759	0.235	0.055	1	SA node
Kcnh2	0.00110565	1.00424	0.941	0.622	1	SA node
Nap1l5	0.00112465	2.64964	0.235	0.057	1	SA node
H2afz	0.00113136	0.510767	1	0.987	1	SA node
Rab11fip3	0.00114265	2.49753	0.294	0.081	1	SA node
Tln2	0.00114382	0.869031	0.941	0.695	1	SA node
Tmem158	0.00119355	2.49949	0.235	0.056	1	SA node
Klhl20	0.00120712	2.57745	0.235	0.056	1	SA node
Stk32c	0.00121271	5.27753	0.059	0.005	1	SA node
Rpl4	0.00123142	0.755699	1	0.961	1	SA node
Tnni1	0.00124486	0.474066	1	0.998	1	SA node
Gimap9	0.00127501	4.86367	0.059	0.005	1	SA node
Runx1t1	0.00128358	1.47192	0.529	0.211	1	SA node
Abracl	0.00129716	1.13032	0.941	0.803	1	SA node
Tbx5	0.00129745	1.54926	0.647	0.371	1	SA node
Stard6	0.00131193	4.77501	0.059	0.005	1	SA node
Slc12a3	0.00131193	4.51028	0.059	0.005	1	SA node
Wdr59	0.00131576	2.8569	0.176	0.034	1	SA node
Gsta4	0.00131674	-1.17226	0.529	0.814	1	SA node
Casq2	0.0013319	-0.716759	0.882	0.986	1	SA node
Nek1	0.00133201	1.91	0.353	0.108	1	SA node
Fam212b	0.00133993	2.11617	0.294	0.08	1	SA node
Pygb	0.001369	-0.926532	0.529	0.83	1	SA node
Plppr4	0.00137546	3.20393	0.118	0.017	1	SA node
Ascc1	0.00138856	-1.52764	0.294	0.692	1	SA node
Rnf10	0.00139296	0.824546	0.941	0.802	1	SA node
Cnksr3	0.00139802	2.60306	0.235	0.059	1	SA node
Zfp990	0.00140011	3.44169	0.118	0.017	1	SA node
Kcng2	0.00140283	-0.685622	0.941	0.974	1	SA node
Prss35	0.00143917	2.12	0.294	0.085	1	SA node
Galnt18	0.00145366	-2.15553	0.059	0.474	1	SA node
Cd9	0.00147041	-2.10265	0.059	0.483	1	SA node
Npc1	0.00147738	1.91857	0.412	0.161	1	SA node
Armcx3	0.00147956	1.13653	0.824	0.429	1	SA node
Utp4	0.00148192	2.08951	0.353	0.122	1	SA node
Pcdhga1	0.00148253	5.07007	0.059	0.005	1	SA node
Asb11	0.00149167	-1.48963	0.235	0.631	1	SA node
Nrap	0.00152425	-0.912721	0.412	0.789	1	SA node
Msantd3	0.00153952	2.21156	0.353	0.116	1	SA node
Rogdi	0.00154175	1.99071	0.353	0.114	1	SA node
Tubb5	0.00154292	0.586097	1	0.935	1	SA node
Rfx8	0.00156176	4.73002	0.059	0.005	1	SA node
Slc48a1	0.00157133	1.00785	0.882	0.649	1	SA node
Gmnn	0.00157299	1.75962	0.471	0.188	1	SA node
Pabpc4l	0.00158114	2.28269	0.235	0.055	1	SA node
Cox14	0.00159668	-0.643739	0.882	0.977	1	SA node
Ppa2	0.00161621	0.890655	1	0.654	1	SA node
Myoz1	0.00161939	-2.16793	0.059	0.473	1	SA node
Slc2a3	0.00162233	4.29726	0.059	0.005	1	SA node
Tmem176b	0.00165551	0.675909	1	0.885	1	SA node
Hectd2	0.00166153	3.13026	0.176	0.035	1	SA node
Ncoa7	0.00166338	1.94132	0.353	0.109	1	SA node
Hnrnpa1	0.00168844	0.867655	0.941	0.851	1	SA node
Luzp1	0.0016955	0.938664	0.882	0.659	1	SA node
Rpl10a	0.00169557	0.440696	1	0.999	1	SA node
Ndufa12	0.00169557	0.459136	1	0.999	1	SA node
Tceal9	0.00172507	0.870348	0.941	0.793	1	SA node
Plekha3	0.00176895	1.47418	0.529	0.237	1	SA node
Rps24	0.00177646	0.385905	1	1	1	SA node
Gm26877	0.00178632	5.02811	0.059	0.005	1	SA node
Chst7	0.00179236	5.01516	0.059	0.005	1	SA node
Cox5b	0.00180107	-0.381063	1	1	1	SA node
Gm12258	0.00180661	3.59406	0.118	0.018	1	SA node
Tyms	0.00181472	2.05367	0.353	0.123	1	SA node
Pou5f1	0.00182286	4.77258	0.059	0.005	1	SA node
Mylk3	0.00186714	-0.710668	0.824	0.959	1	SA node
1110012L19Rik	0.0018681	1.33224	0.588	0.28	1	SA node
Rab8b	0.00188322	2.74579	0.235	0.06	1	SA node
Gpr62	0.0018853	4.67237	0.059	0.005	1	SA node
Rtraf	0.0018865	0.57624	1	0.964	1	SA node
Cldnd1	0.00189236	1.15986	0.824	0.64	1	SA node
Noxred1	0.00190441	4.69442	0.059	0.005	1	SA node
Ccrl2	0.0019121	1.92368	0.353	0.118	1	SA node
Lsm11	0.00193374	2.23601	0.235	0.056	1	SA node
Ptp4a1	0.00193942	-1.11216	0.412	0.753	1	SA node
Psd	0.00194316	4.55522	0.059	0.005	1	SA node
Hddc2	0.00194355	1.685	0.471	0.189	1	SA node
AC163040.1	0.00196281	4.36122	0.059	0.005	1	SA node
Phtf2	0.0019777	-1.37595	0.294	0.649	1	SA node
Srsf3	0.00198202	0.619313	0.941	0.841	1	SA node
Churc1	0.00198602	-0.777083	0.765	0.93	1	SA node
Mllt3	0.00198927	-2.78173	0	0.377	1	SA node
Hadhb	0.002016	-0.736447	0.882	0.954	1	SA node
Mlycd	0.00202116	-1.39302	0.294	0.672	1	SA node
Oaz1	0.00205312	-0.279292	1	1	1	SA node
Acadvl	0.00205893	-0.791161	0.882	0.934	1	SA node
9930104L06Rik	0.00209152	3.44858	0.176	0.038	1	SA node
Zkscan5	0.00211608	1.85688	0.353	0.115	1	SA node
Paqr9	0.00215775	1.68262	0.529	0.228	1	SA node
Zfp960	0.00215909	4.88164	0.059	0.005	1	SA node
mt-Nd4l	0.00217035	-0.373511	1	1	1	SA node
Cntln	0.00217208	2.35538	0.235	0.059	1	SA node
Agt	0.00218868	2.01304	0.294	0.084	1	SA node
Vps37b	0.00219534	1.22996	0.706	0.406	1	SA node
Slc19a3	0.00223097	4.79934	0.059	0.005	1	SA node
Mfsd9	0.00223828	4.73237	0.059	0.005	1	SA node
Dnajb3	0.00224765	2.66185	0.176	0.036	1	SA node
Ncald	0.00228678	1.75856	0.471	0.198	1	SA node
Ephb1	0.00228735	-2.74275	0	0.37	1	SA node
Cct4	0.00229094	0.704007	0.941	0.848	1	SA node
Fau	0.00229697	0.290394	1	1	1	SA node
Grb14	0.0023012	0.76473	1	0.726	1	SA node
Unc13b	0.0023099	2.26982	0.235	0.058	1	SA node
H2-Ab1	0.00234292	4.20726	0.059	0.005	1	SA node
Scyl2	0.00241101	1.75563	0.353	0.113	1	SA node
Ube2l6	0.00242633	2.85944	0.235	0.063	1	SA node
Gm26669	0.00243588	2.01008	0.294	0.087	1	SA node
Rabggtb	0.00249742	-0.933611	0.647	0.828	1	SA node
Rfc3	0.00250163	1.64088	0.471	0.209	1	SA node
Lzts3	0.00251876	4.94416	0.059	0.005	1	SA node
Ndufb5	0.00252176	-0.348737	1	1	1	SA node
Gm49130	0.00252681	4.90118	0.059	0.005	1	SA node
Gm15910	0.00252681	4.77778	0.059	0.005	1	SA node
Caml	0.00255178	1.35379	0.588	0.305	1	SA node
Caly	0.00255927	4.72047	0.059	0.005	1	SA node
Zdhhc2	0.00256666	2.59503	0.235	0.064	1	SA node
Kif21a	0.0025709	-1.80744	0.118	0.499	1	SA node
Pgbd1	0.0025775	3.33436	0.118	0.018	1	SA node
4430402I18Rik	0.00258918	-2.54332	0	0.364	1	SA node
Magt1	0.00261192	1.32037	0.706	0.385	1	SA node
Gm11725	0.00262533	4.66464	0.059	0.005	1	SA node
Gm10605	0.00262533	4.56749	0.059	0.005	1	SA node
Dact3	0.00264381	1.26509	0.824	0.456	1	SA node
Ccdc92	0.0026505	4.68388	0.059	0.005	1	SA node
Pdhb	0.00266014	-0.682027	0.941	0.947	1	SA node
Tyw5	0.00266244	2.29321	0.294	0.088	1	SA node
Prkar2b	0.00271871	4.45364	0.059	0.005	1	SA node
Slc44a3	0.00273601	4.35669	0.059	0.005	1	SA node
Syn2	0.00273601	4.34236	0.059	0.005	1	SA node
Rab33b	0.00281921	2.496	0.235	0.06	1	SA node
Selenof	0.00281923	0.867319	0.941	0.862	1	SA node
Kazn	0.00283679	2.51353	0.176	0.037	1	SA node
Gnb2	0.00286698	-0.566755	1	0.978	1	SA node
Rad17	0.00289465	-2.44698	0	0.358	1	SA node
Sort1	0.00290921	2.18236	0.353	0.13	1	SA node
Isoc1	0.0029166	1.13125	0.882	0.652	1	SA node
Tstd3	0.00292467	2.08247	0.353	0.124	1	SA node
Gm27184	0.00293369	4.93097	0.059	0.005	1	SA node
Tpt1	0.00294742	-0.29835	1	1	1	SA node
Gm26685	0.0029704	4.70498	0.059	0.005	1	SA node
Fgf13	0.00299661	-1.39502	0.118	0.514	1	SA node
Zbtb4	0.00300268	2.13992	0.353	0.132	1	SA node
Ccdc127	0.00300602	1.30935	0.647	0.379	1	SA node
B4galt2	0.00302345	1.75945	0.353	0.116	1	SA node
Bbof1	0.00302494	2.72076	0.176	0.038	1	SA node
Uqcr11	0.00302674	-0.314777	1	1	1	SA node
Dnajc15	0.00303433	0.682593	1	0.882	1	SA node
Tox3	0.00305034	1.56948	0.529	0.239	1	SA node
Emg1	0.00309119	-1.21694	0.294	0.654	1	SA node
Rpn1	0.00309789	1.26546	0.647	0.308	1	SA node
Dcaf13	0.0030987	1.40056	0.529	0.236	1	SA node
Hint1	0.00310924	0.346796	1	1	1	SA node
Wnk1	0.00312135	-0.758448	0.941	0.924	1	SA node
Hes1	0.003132	-1.37911	0.471	0.733	1	SA node
Anapc15	0.00313364	1.11079	0.647	0.282	1	SA node
Pgam1	0.00315694	0.671404	0.941	0.895	1	SA node
Cnot9	0.00318443	2.32005	0.235	0.063	1	SA node
Rwdd4a	0.0031966	1.00086	0.706	0.382	1	SA node
Cenpw	0.00321966	1.95239	0.353	0.132	1	SA node
Styx	0.00323479	2.06801	0.294	0.089	1	SA node
Gm11716	0.00327713	-1.42187	0.294	0.643	1	SA node
Bzw2	0.00331356	0.763998	0.941	0.882	1	SA node
Chtf8	0.00331948	1.83146	0.412	0.155	1	SA node
Pcmtd2	0.00332258	-2.44436	0	0.351	1	SA node
Insig2	0.00334706	-1.54348	0.118	0.525	1	SA node
Gpx7	0.00335731	1.36545	0.588	0.26	1	SA node
Zfp973	0.00337087	5.0048	0.059	0.006	1	SA node
Eid1	0.00337317	-0.509178	1	0.991	1	SA node
Lamp1	0.00338615	-0.611129	0.941	0.971	1	SA node
Opn1sw	0.00339137	4.7365	0.059	0.006	1	SA node
Kank1	0.00340196	1.52471	0.588	0.318	1	SA node
Tspan5	0.00344222	2.83645	0.176	0.039	1	SA node
Nudt14	0.00344626	1.5165	0.588	0.306	1	SA node
Rbm3	0.00344709	0.440921	1	0.981	1	SA node
Rpl36a	0.00345794	0.477067	1	0.979	1	SA node
Ndufa13	0.00347654	-0.305477	1	1	1	SA node
Tbc1d1	0.00349437	1.40132	0.529	0.235	1	SA node
Trappc8	0.00350176	1.88637	0.353	0.132	1	SA node
1810034E14Rik	0.00355437	2.45996	0.176	0.038	1	SA node
Pcolce2	0.00355952	4.67413	0.059	0.006	1	SA node
Yod1	0.00358582	2.50856	0.235	0.066	1	SA node
Rps6	0.00359472	0.536949	1	0.988	1	SA node
Wwc1	0.00361361	4.46436	0.059	0.006	1	SA node
Slc7a5	0.00361864	2.39042	0.235	0.066	1	SA node
Trdn	0.00365665	-0.44878	1	0.999	1	SA node
Hhex	0.00365741	4.41385	0.059	0.006	1	SA node
Slfn5	0.00369244	3.19693	0.176	0.041	1	SA node
mt-Nd6	0.00370607	-0.952807	0.294	0.72	1	SA node
S1pr1	0.00372131	-2.21091	0.059	0.398	1	SA node
Gm31659	0.00372183	0.531677	1	0.837	1	SA node
Cpt1a	0.00376639	-2.43479	0	0.344	1	SA node
Rps26	0.00377451	0.388937	1	0.999	1	SA node
Ckb	0.00380662	-0.792422	0.765	0.938	1	SA node
Faap24	0.00390061	2.68167	0.176	0.039	1	SA node
F420014N23Rik	0.00390476	4.80469	0.059	0.006	1	SA node
Kcnk3	0.00390596	-1.19778	0.471	0.713	1	SA node
Dynlrb1	0.00391479	0.58703	1	0.914	1	SA node
Gm26737	0.00391632	4.8266	0.059	0.006	1	SA node
Ap3b2	0.00395117	4.70581	0.059	0.006	1	SA node
Flt4	0.00397483	3.25325	0.118	0.02	1	SA node
Spsb1	0.00404234	1.52195	0.412	0.152	1	SA node
Selenoh	0.00406511	1.03925	0.882	0.668	1	SA node
Evi5	0.0041024	-1.83032	0.118	0.465	1	SA node
Tsen54	0.00410475	2.25406	0.235	0.064	1	SA node
Tnfrsf19	0.00412968	4.53953	0.059	0.006	1	SA node
Map1lc3a	0.0041515	0.311749	1	0.999	1	SA node
4631405J19Rik	0.00417742	-1.59435	0.176	0.538	1	SA node
Ndufv3	0.00422041	-0.367085	1	0.999	1	SA node
Acot13	0.00425359	-0.73842	0.824	0.942	1	SA node
Ptgr1	0.0042543	2.76904	0.176	0.04	1	SA node
Lrrc8b	0.00428665	3.38811	0.118	0.02	1	SA node
Cab39l	0.00428906	-1.48173	0.118	0.497	1	SA node
Fxyd2	0.00429028	4.34067	0.059	0.006	1	SA node
Gprc5c	0.00430287	4.29095	0.059	0.006	1	SA node
Sra1	0.00430954	-0.837876	0.647	0.85	1	SA node
Syncrip	0.00431741	1.00588	0.765	0.598	1	SA node
Zfp334	0.00433861	2.4377	0.176	0.039	1	SA node
Angptl2	0.00434206	1.4224	0.529	0.261	1	SA node
BC003331	0.00435681	-1.63844	0.176	0.507	1	SA node
Nlgn2	0.00436102	3.13061	0.118	0.02	1	SA node
Commd8	0.0043619	1.02455	0.765	0.42	1	SA node
Grsf1	0.0043825	0.809307	0.824	0.583	1	SA node
Eif4e3	0.00440144	1.9675	0.294	0.092	1	SA node
Tnfaip8	0.00440529	-1.84516	0.059	0.427	1	SA node
Zfp157	0.00442071	2.15052	0.235	0.064	1	SA node
Cox6b2	0.00443684	1.55307	0.353	0.122	1	SA node
Cdh13	0.00449304	-0.796267	0.706	0.901	1	SA node
Chgb	0.00451803	4.70154	0.059	0.006	1	SA node
Pdlim7	0.00452479	0.718782	1	0.892	1	SA node
H2-Eb1	0.00453106	4.706	0.059	0.006	1	SA node
Glmn	0.0045565	1.53861	0.412	0.159	1	SA node
Pja1	0.00456017	1.29294	0.588	0.325	1	SA node
Lrrc24	0.00457035	4.6207	0.059	0.006	1	SA node
Pacsin3	0.00460744	-1.26144	0.294	0.651	1	SA node
Rpsa	0.00462052	0.449225	1	0.999	1	SA node
Map2k2	0.00465086	0.631922	1	0.809	1	SA node
Ahnak2	0.00465687	3.25876	0.118	0.02	1	SA node
Gm17056	0.00469122	1.51209	0.412	0.164	1	SA node
Ndufb7	0.00470636	-0.407317	1	0.999	1	SA node
Ap4b1	0.0047282	2.49432	0.176	0.04	1	SA node
Nt5dc2	0.00474691	1.0609	0.824	0.611	1	SA node
Adgra2	0.00476675	3.59729	0.118	0.021	1	SA node
Auts2	0.00480374	1.06777	0.706	0.391	1	SA node
Ythdc2	0.00480951	1.58354	0.412	0.166	1	SA node
Rai2	0.00482921	2.90332	0.118	0.02	1	SA node
Grb2	0.00484811	-0.718138	0.882	0.903	1	SA node
Bcam	0.00486084	-0.896116	0.706	0.85	1	SA node
Sqstm1	0.00486878	1.05643	0.882	0.627	1	SA node
Stk39	0.00490249	1.61174	0.706	0.451	1	SA node
Yes1	0.00491932	1.53544	0.471	0.209	1	SA node
Ldhd	0.00492915	3.31298	0.118	0.02	1	SA node
Syne2	0.0049441	1.38282	0.529	0.23	1	SA node
Ttc28	0.00495046	1.52766	0.412	0.156	1	SA node
Gm47283	0.00495891	1.49326	0.647	0.355	1	SA node
Pnpla8	0.00503498	0.735228	0.882	0.635	1	SA node
Ybx1	0.00506527	-0.281004	1	1	1	SA node
Tmsb4x	0.00510492	0.346586	1	0.995	1	SA node
Tmem160	0.005108	0.651561	0.941	0.862	1	SA node
Ndc1	0.00511587	2.45382	0.235	0.07	1	SA node
Borcs7	0.00514506	-1.01502	0.412	0.729	1	SA node
Itgb1bp2	0.00514579	0.91092	0.706	0.415	1	SA node
Adamtsl1	0.00515779	2.93255	0.176	0.043	1	SA node
Zbtb20	0.00517899	0.916137	0.941	0.919	1	SA node
Tbc1d12	0.00518237	1.94902	0.294	0.095	1	SA node
Kif16b	0.00523647	1.78807	0.353	0.13	1	SA node
Zfp326	0.00530841	0.685849	0.882	0.64	1	SA node
Ccdc32	0.0053142	-2.30955	0	0.325	1	SA node
5033403F01Rik	0.00532542	4.49437	0.059	0.006	1	SA node
Hccs	0.00535559	1.46	0.588	0.326	1	SA node
Dok4	0.00535723	2.4735	0.235	0.07	1	SA node
Rps8	0.00536089	0.440753	1	1	1	SA node
Myo18b	0.00540458	0.914751	0.706	0.465	1	SA node
9430037G07Rik	0.00542267	3.11223	0.118	0.02	1	SA node
Rps4x	0.00542718	0.316943	1	1	1	SA node
Commd3	0.00547271	-0.601393	0.941	0.94	1	SA node
Cks2	0.00548935	0.918178	0.353	0.128	1	SA node
Zfp277	0.00556057	1.41709	0.471	0.21	1	SA node
Ddr1	0.0055624	1.3702	0.706	0.474	1	SA node
Eif3f	0.00557517	0.536173	1	0.973	1	SA node
Gm43137	0.00558454	4.13219	0.059	0.006	1	SA node
Fance	0.00565159	1.60191	0.412	0.181	1	SA node
Pnrc1	0.00569777	0.631873	1	0.932	1	SA node
Msantd2	0.0057267	1.94623	0.294	0.099	1	SA node
Gm14295	0.00572856	2.23534	0.235	0.067	1	SA node
Tmem37	0.00574472	2.75971	0.176	0.043	1	SA node
Gm45163	0.00576852	3.31599	0.118	0.021	1	SA node
Timp1	0.00577046	1.57389	0.412	0.171	1	SA node
Pex7	0.00579822	-1.305	0.353	0.619	1	SA node
Ghitm	0.00581105	-0.712103	0.765	0.907	1	SA node
Fam214a	0.00581197	1.92616	0.294	0.095	1	SA node
Plcd1	0.00583822	3.25612	0.118	0.021	1	SA node
Nexn	0.00585386	0.396192	1	0.995	1	SA node
Rps20	0.00585716	0.357593	1	1	1	SA node
Aldoa	0.00586155	0.336979	1	0.996	1	SA node
Gm12295	0.00586759	2.83353	0.176	0.044	1	SA node
Unc5b	0.00586912	1.37928	0.471	0.221	1	SA node
Ccdc157	0.0058934	3.28626	0.118	0.021	1	SA node
Mylk4	0.00591561	-2.7746	0	0.319	1	SA node
Atp5j2	0.0059223	0.276595	1	1	1	SA node
Tpgs2	0.00598086	1.54831	0.471	0.204	1	SA node
Vdac3	0.00598248	0.362548	1	0.995	1	SA node
Fam81a	0.00599662	-1.23198	0.412	0.687	1	SA node
Trappc6a	0.00603902	-1.16571	0.471	0.659	1	SA node
Fam171a1	0.00605498	2.73605	0.235	0.074	1	SA node
Wsb1	0.00605535	0.882351	0.765	0.442	1	SA node
1700065D16Rik	0.0060622	4.41684	0.059	0.006	1	SA node
Khdrbs1	0.00606296	0.92046	0.765	0.611	1	SA node
Kcne1l	0.00612881	4.18222	0.059	0.006	1	SA node
Synj1	0.00614362	1.95151	0.294	0.098	1	SA node
Plbd2	0.0061454	-1.7291	0.118	0.439	1	SA node
Rpl6	0.00617905	0.321218	1	1	1	SA node
Plp2	0.00621411	1.79142	0.353	0.139	1	SA node
Tspan7	0.00626397	1.69954	0.412	0.167	1	SA node
Gm26619	0.00632103	3.25615	0.118	0.021	1	SA node
Cep112	0.00634077	2.46148	0.235	0.073	1	SA node
Rdx	0.00637251	0.643457	1	0.808	1	SA node
Mpc2	0.00637784	-0.410643	1	0.999	1	SA node
Twist1	0.00638308	4.87434	0.059	0.006	1	SA node
Fuom	0.00646823	0.851444	0.882	0.806	1	SA node
Rpl31	0.00648418	0.372199	1	0.992	1	SA node
Scg5	0.00649958	2.58855	0.176	0.043	1	SA node
Frem2	0.00655384	1.97112	0.235	0.066	1	SA node
Pacsin1	0.00660974	4.44883	0.059	0.006	1	SA node
Asns	0.00662714	3.02547	0.118	0.021	1	SA node
Nudt3	0.00663652	-0.748751	0.824	0.896	1	SA node
Parpbp	0.00664525	4.48557	0.059	0.006	1	SA node
Lcp1	0.00666307	3.79896	0.059	0.006	1	SA node
Psme4	0.00670369	-1.10912	0.412	0.672	1	SA node
Serpine2	0.00670656	1.29138	0.588	0.316	1	SA node
Plpp7	0.00671219	-1.77307	0.118	0.427	1	SA node
Dapk1	0.00675022	2.70689	0.176	0.044	1	SA node
Pura	0.00680463	0.717915	0.941	0.725	1	SA node
Stard9	0.00680723	2.82004	0.176	0.045	1	SA node
Hltf	0.00682049	1.5561	0.412	0.174	1	SA node
Scyl3	0.0068463	2.67431	0.176	0.044	1	SA node
Immp2l	0.00686494	2.70341	0.176	0.044	1	SA node
Dcaf12l2	0.00688025	4.27792	0.059	0.006	1	SA node
Vamp1	0.00692047	2.59694	0.176	0.043	1	SA node
Rpl12	0.00695518	0.632263	1	0.996	1	SA node
Wdr83os	0.00695863	0.913983	0.824	0.561	1	SA node
Bex1	0.00696552	1.15917	0.647	0.432	1	SA node
2900076A07Rik	0.00697602	1.66072	0.353	0.13	1	SA node
Nedd9	0.00698814	1.12931	0.529	0.234	1	SA node
Nkapl	0.00702637	2.8498	0.176	0.043	1	SA node
Mfsd10	0.00703965	1.91196	0.294	0.101	1	SA node
Slc38a4	0.00704483	1.71886	0.471	0.213	1	SA node
Sart3	0.0070482	1.69309	0.353	0.133	1	SA node
Bves	0.00708155	1.27654	0.588	0.302	1	SA node
Lbh	0.00709964	-0.688265	0.765	0.938	1	SA node
Zbtb8a	0.0071369	2.54072	0.176	0.043	1	SA node
Rhob	0.00720795	1.29087	0.647	0.434	1	SA node
Cebpa	0.00721791	4.58608	0.059	0.006	1	SA node
Ttc39a	0.00723689	4.65539	0.059	0.006	1	SA node
Hadha	0.00726331	-0.518314	1	0.975	1	SA node
Higd1a	0.00730518	-0.450566	1	0.991	1	SA node
Prtn3	0.00731324	4.47142	0.059	0.006	1	SA node
Ppil4	0.00737941	0.967757	0.706	0.436	1	SA node
Fgf9	0.00743004	-1.64628	0.059	0.405	1	SA node
Ttc21b	0.00746217	2.65536	0.176	0.044	1	SA node
Myzap	0.00746356	0.759145	1	0.721	1	SA node
Vps8	0.00748811	1.80291	0.353	0.141	1	SA node
Mgrn1	0.00758094	1.58724	0.529	0.274	1	SA node
Troap	0.00758622	4.2206	0.059	0.006	1	SA node
Nifk	0.0076044	1.20138	0.529	0.256	1	SA node
Eef1a2	0.00760825	0.82803	0.941	0.839	1	SA node
Cxcl1	0.00762091	1.73354	0.529	0.294	1	SA node
Vcpip1	0.00764853	1.6876	0.353	0.138	1	SA node
Sbk2	0.00770097	-1.00497	0.294	0.581	1	SA node
Neil3	0.00770598	3.91992	0.059	0.006	1	SA node
Ndufa2	0.00770743	-0.364312	1	1	1	SA node
Cav3	0.00773296	0.640436	0.882	0.853	1	SA node
Ppp1cb	0.00780459	0.958091	0.824	0.765	1	SA node
Kif5b	0.0078209	0.542366	1	0.926	1	SA node
3110082I17Rik	0.00782139	1.82143	0.294	0.099	1	SA node
Cers6	0.00782743	4.13727	0.059	0.006	1	SA node
Mafg	0.00783586	1.15051	0.588	0.333	1	SA node
Gm26899	0.00788879	4.25004	0.059	0.006	1	SA node
Dpy30	0.00795239	0.713787	0.941	0.718	1	SA node
Zfp7	0.00797533	4.77415	0.059	0.007	1	SA node
Hspb7	0.00798431	-0.626862	1	0.98	1	SA node
Slc8b1	0.00799586	4.75082	0.059	0.007	1	SA node
Metap2	0.0080509	0.507851	0.941	0.894	1	SA node
Lysmd3	0.00807296	1.44939	0.471	0.201	1	SA node
Gm9925	0.00807844	4.45748	0.059	0.007	1	SA node
Plekhn1	0.0080857	2.27681	0.235	0.072	1	SA node
Btg2	0.00818958	1.22072	0.941	0.777	1	SA node
Hfe2	0.00820318	-1.41553	0.235	0.534	1	SA node
Ccdc85b	0.00821759	1.66027	0.588	0.423	1	SA node
C530008M17Rik	0.00823394	3.32075	0.118	0.023	1	SA node
Shb	0.00827811	1.26886	0.647	0.384	1	SA node
Pin1	0.00828274	-0.749361	0.706	0.853	1	SA node
Chchd10	0.00832464	0.283721	1	1	1	SA node
Ttn	0.0083367	-0.594287	1	1	1	SA node
Tapbpl	0.00835779	2.65819	0.176	0.045	1	SA node
Apobec2	0.008376	-0.496509	1	0.994	1	SA node
Scrn1	0.0083869	1.35243	0.529	0.278	1	SA node
1810058I24Rik	0.00846884	-0.494365	1	0.992	1	SA node
Plin2	0.00848366	-1.65863	0.118	0.429	1	SA node
Phldb2	0.00850803	1.57731	0.353	0.136	1	SA node
Aldh2	0.0085246	0.916495	0.824	0.549	1	SA node
Sppl2a	0.00854263	-1.14558	0.235	0.559	1	SA node
Bmp2k	0.008585	2.63082	0.176	0.045	1	SA node
Hmgb1	0.00859093	0.754727	0.882	0.766	1	SA node
Atf5	0.00861	1.76635	0.412	0.18	1	SA node
Tacc2	0.00862559	1.21362	0.529	0.247	1	SA node
Plekha7	0.00863258	-1.35915	0.294	0.584	1	SA node
Nr1h2	0.00864434	1.06041	0.588	0.319	1	SA node
1700113A16Rik	0.00867264	3.12539	0.118	0.023	1	SA node
Etv6	0.00873065	1.94207	0.294	0.108	1	SA node
Ptpn13	0.0087536	2.76081	0.176	0.047	1	SA node
Ust	0.00876707	4.23979	0.059	0.007	1	SA node
Psd3	0.00880768	-1.96028	0.176	0.449	1	SA node
Gm48604	0.0088118	4.15099	0.059	0.007	1	SA node
Zhx1	0.00881195	1.63229	0.353	0.138	1	SA node
Nup37	0.00885283	1.99971	0.235	0.07	1	SA node
Lamb1	0.00885953	1.42819	0.588	0.328	1	SA node
Tmem102	0.00886541	4.71427	0.059	0.007	1	SA node
Gm13481	0.00888773	4.6439	0.059	0.007	1	SA node
Eepd1	0.00892643	1.28818	0.471	0.222	1	SA node
Srgap1	0.00896919	-1.00651	0.294	0.637	1	SA node
Gm28523	0.00897753	4.68591	0.059	0.007	1	SA node
Gtpbp10	0.00900831	1.81596	0.294	0.103	1	SA node
Afdn	0.009105	1.22109	0.706	0.481	1	SA node
Add3	0.00910831	0.823739	0.882	0.667	1	SA node
Ciart	0.00912332	3.49455	0.118	0.024	1	SA node
1500009L16Rik	0.00918779	1.01918	0.706	0.451	1	SA node
Cebpzos	0.00920038	-0.833464	0.529	0.759	1	SA node
Nudt13	0.00922957	1.52319	0.353	0.128	1	SA node
Rpl26	0.00937028	0.322357	1	1	1	SA node
Fitm1	0.00941984	-0.597536	1	0.972	1	SA node
Xpnpep3	0.00942819	2.16514	0.235	0.073	1	SA node
U2af2	0.00944679	1.48424	0.529	0.287	1	SA node
Tmem51	0.00947489	1.35551	0.706	0.442	1	SA node
Usp5	0.00947569	-2.06285	0	0.292	1	SA node
Ddx6	0.00951565	0.699798	0.824	0.685	1	SA node
Decr1	0.0095585	-0.752361	0.588	0.755	1	SA node
Tipin	0.0096016	1.30131	0.471	0.217	1	SA node
Creb3l2	0.00962511	1.12553	0.588	0.345	1	SA node
Mrpl15	0.00963012	0.433244	0.941	0.877	1	SA node
Ugdh	0.00967089	2.15129	0.235	0.073	1	SA node
Zfp407	0.00973349	1.83778	0.294	0.107	1	SA node
Trim7	0.0097985	4.02596	0.059	0.007	1	SA node
5430431A17Rik	0.00981203	-0.794508	0.824	0.916	1	SA node
Gm26558	0.00981334	4.68014	0.059	0.007	1	SA node
Dnajc3	0.00985211	1.0262	0.882	0.579	1	SA node
Ndufs3	0.00988121	-0.40794	1	0.99	1	SA node
Samd13	0.00991041	4.58135	0.059	0.007	1	SA node
Trac	0.00991041	4.53574	0.059	0.007	1	SA node
Tbx3os1	0.00991041	4.42486	0.059	0.007	1	SA node
Slc25a20	0.00993699	-1.63972	0.118	0.413	1	SA node
Gstt1	0.00997482	2.01694	0.294	0.106	1	SA node
Neto2	0.0099761	2.60172	0.176	0.046	1	SA node
Mptx1	4.7078e-59	9.31302	0.038	0	1.46201e-54	AV node
Apba2	4.7078e-59	9.31302	0.038	0	1.46201e-54	AV node
Has2	4.7078e-59	9.31302	0.038	0	1.46201e-54	AV node
Gm43352	4.7078e-59	9.19682	0.038	0	1.46201e-54	AV node
Gm12729	4.7078e-59	9.05338	0.038	0	1.46201e-54	AV node
Gm26952	4.7078e-59	9.01482	0.038	0	1.46201e-54	AV node
Naip2	4.7078e-59	9.01475	0.038	0	1.46201e-54	AV node
Dner	4.71297e-132	8.95705	0.154	0	1.46361e-127	AV node
Gm6970	4.7078e-59	8.95167	0.038	0	1.46201e-54	AV node
Lin7a	4.7078e-59	8.87438	0.038	0	1.46201e-54	AV node
Igfn1	3.43909e-30	8.87389	0.038	0	1.06801e-25	AV node
Mmp9	4.7078e-59	8.76476	0.038	0	1.46201e-54	AV node
Mndal	4.7078e-59	8.73937	0.038	0	1.46201e-54	AV node
Irak3	4.7078e-59	8.73937	0.038	0	1.46201e-54	AV node
Adcyap1r1	3.43909e-30	8.57742	0.038	0	1.06801e-25	AV node
Hoxb4	3.43909e-30	8.56402	0.038	0	1.06801e-25	AV node
Hrh1	4.7078e-59	8.56003	0.038	0	1.46201e-54	AV node
Cyp4v3	3.43909e-30	8.55428	0.038	0	1.06801e-25	AV node
Gm26636	3.43909e-30	8.53098	0.038	0	1.06801e-25	AV node
Dok6	3.43909e-30	8.51214	0.038	0	1.06801e-25	AV node
Trim30a	3.43909e-30	8.51097	0.038	0	1.06801e-25	AV node
Olfr1124	4.7078e-59	8.50501	0.038	0	1.46201e-54	AV node
Gm2956	4.7078e-59	8.50501	0.038	0	1.46201e-54	AV node
Gm3164	4.7078e-59	8.48439	0.038	0	1.46201e-54	AV node
Efcab9	4.7078e-59	8.48439	0.038	0	1.46201e-54	AV node
Gm11770	4.7078e-59	8.48439	0.038	0	1.46201e-54	AV node
Gm29824	3.43909e-30	8.35437	0.038	0	1.06801e-25	AV node
Gm11110	3.43909e-30	8.33697	0.038	0	1.06801e-25	AV node
Crabp1	8.65457e-75	8.31207	0.115	0.001	2.68768e-70	AV node
Grem2	1.10252e-15	8.25712	0.038	0	3.42388e-11	AV node
Rims1	6.99564e-48	8.23861	0.115	0.001	2.17249e-43	AV node
Gm16339	3.43909e-30	8.21712	0.038	0	1.06801e-25	AV node
Susd3	3.43909e-30	8.21006	0.038	0	1.06801e-25	AV node
Dlec1	1.56683e-20	8.20724	0.038	0	4.86579e-16	AV node
A2ml1	3.43909e-30	8.20277	0.038	0	1.06801e-25	AV node
4921522P10Rik	3.43909e-30	8.1986	0.038	0	1.06801e-25	AV node
Klhl14	3.43909e-30	8.19415	0.038	0	1.06801e-25	AV node
Gm10358	3.43909e-30	8.10974	0.038	0	1.06801e-25	AV node
Syt9	1.56683e-20	8.0682	0.038	0	4.86579e-16	AV node
AC165274.3	3.43909e-30	8.05625	0.038	0	1.06801e-25	AV node
Rspo3	0	8.01797	0.962	0.01	0	AV node
Fgfr4	3.57445e-30	7.96847	0.038	0	1.11005e-25	AV node
Zdhhc22	3.57445e-30	7.96646	0.038	0	1.11005e-25	AV node
Fgr	1.56683e-20	7.8829	0.038	0	4.86579e-16	AV node
AY512931	1.56683e-20	7.87311	0.038	0	4.86579e-16	AV node
CT025521.3	1.56683e-20	7.84829	0.038	0	4.86579e-16	AV node
Crybg1	1.56683e-20	7.80588	0.038	0	4.86579e-16	AV node
Tsga10ip	3.34532e-77	7.79593	0.154	0.001	1.03889e-72	AV node
Larp6	1.56683e-20	7.74909	0.038	0	4.86579e-16	AV node
Gm40438	3.57445e-30	7.73203	0.038	0	1.11005e-25	AV node
9430018G01Rik	1.60769e-20	7.71259	0.038	0	4.99267e-16	AV node
Serpina11	3.57445e-30	7.67201	0.038	0	1.11005e-25	AV node
Sele	3.57445e-30	7.6157	0.038	0	1.11005e-25	AV node
Gm11789	5.6748e-115	7.60026	0.231	0.002	1.76231e-110	AV node
Lrrc4c	9.15145e-13	7.55533	0.038	0.001	2.84198e-08	AV node
Gm13427	3.57445e-30	7.5112	0.038	0	1.11005e-25	AV node
Tub	6.15605e-34	7.49918	0.077	0.001	1.91176e-29	AV node
Ism2	1.60769e-20	7.4977	0.038	0	4.99267e-16	AV node
Hoxb3	3.91576e-84	7.49538	0.154	0.001	1.21604e-79	AV node
Dchs1	4.23369e-47	7.4628	0.077	0	1.31477e-42	AV node
A330008L17Rik	1.10252e-15	7.43569	0.038	0	3.42388e-11	AV node
Crtac1	1.12402e-15	7.34696	0.038	0	3.49064e-11	AV node
Pnma2	1.12402e-15	7.31342	0.038	0	3.49064e-11	AV node
Adam21	1.60769e-20	7.3126	0.038	0	4.99267e-16	AV node
Dnm1	9.15145e-13	7.28423	0.038	0.001	2.84198e-08	AV node
Olfr872	1.6496e-20	7.22768	0.038	0	5.12282e-16	AV node
Fmn2	1.32748e-26	7.18051	0.077	0.001	4.1225e-22	AV node
Ltf	1.12402e-15	7.16587	0.038	0	3.49064e-11	AV node
Olfr731	1.6496e-20	7.1547	0.038	0	5.12282e-16	AV node
Plekhg6	1.6496e-20	7.14	0.038	0	5.12282e-16	AV node
Rtn1	1.13985e-18	7.12619	0.077	0.002	3.53981e-14	AV node
Oprk1	1.14593e-15	7.12321	0.038	0	3.55868e-11	AV node
Gcgr	1.2991e-212	7.11562	0.615	0.008	4.03436e-208	AV node
Exoc3l	8.21502e-11	7.04744	0.038	0.001	2.55117e-06	AV node
Kcnj14	1.16826e-15	7.04344	0.038	0	3.62802e-11	AV node
Gli3	8.21502e-11	7.02552	0.038	0.001	2.55117e-06	AV node
Serpina9	8.21502e-11	7.01523	0.038	0.001	2.55117e-06	AV node
Ednrb	5.41926e-90	7.01315	0.192	0.002	1.68295e-85	AV node
Fli1	8.21502e-11	6.98225	0.038	0.001	2.55117e-06	AV node
Fcamr	8.21502e-11	6.97516	0.038	0.001	2.55117e-06	AV node
Cntn4	8.32149e-11	6.96119	0.038	0.001	2.58424e-06	AV node
Npy1r	2.0639e-09	6.95084	0.038	0.001	6.40945e-05	AV node
Olfr39	3.57445e-30	6.92279	0.038	0	1.11005e-25	AV node
Sowaha	2.0639e-09	6.90423	0.038	0.001	6.40945e-05	AV node
Scara3	8.90151e-62	6.85544	0.154	0.002	2.76436e-57	AV node
Tnxb	9.43861e-13	6.85509	0.038	0.001	2.93116e-08	AV node
Fsd1	8.32149e-11	6.84731	0.038	0.001	2.58424e-06	AV node
Fam227b	3.70086e-20	6.83751	0.077	0.001	1.1493e-15	AV node
Ankrd34b	9.43861e-13	6.82303	0.038	0.001	2.93116e-08	AV node
Cnrip1	4.24183e-33	6.81151	0.115	0.002	1.3173e-28	AV node
Vgll2	8.42931e-11	6.77852	0.038	0.001	2.61772e-06	AV node
Gm15409	8.32149e-11	6.77619	0.038	0.001	2.58424e-06	AV node
Dnah2os	2.08681e-09	6.75678	0.038	0.001	6.48059e-05	AV node
4930426D05Rik	1.16826e-15	6.74612	0.038	0	3.62802e-11	AV node
Gm2762	8.32149e-11	6.71919	0.038	0.001	2.58424e-06	AV node
Prdm6	3.55223e-44	6.71434	0.154	0.002	1.10314e-39	AV node
Kctd4	8.53849e-11	6.70454	0.038	0.001	2.65163e-06	AV node
Rab38	1.16826e-15	6.70025	0.038	0	3.62802e-11	AV node
Lcp1	3.18234e-157	6.6913	0.423	0.005	9.88275e-153	AV node
Olfr1251	9.7346e-13	6.68087	0.038	0.001	3.02308e-08	AV node
Kcna1	2.08681e-09	6.66487	0.038	0.001	6.48059e-05	AV node
Dnaic2	2.08681e-09	6.65428	0.038	0.001	6.48059e-05	AV node
Unc5c	9.58548e-13	6.64963	0.038	0.001	2.97677e-08	AV node
Vsnl1	3.43433e-149	6.62864	0.346	0.003	1.06653e-144	AV node
Nsg1	1.55221e-07	6.59695	0.038	0.001	0.00482039	AV node
Gm37855	1.55221e-07	6.59075	0.038	0.001	0.00482039	AV node
Macc1	8.53849e-11	6.58079	0.038	0.001	2.65163e-06	AV node
Impg1	9.7346e-13	6.56187	0.038	0.001	3.02308e-08	AV node
4921514A10Rik	9.7346e-13	6.54889	0.038	0.001	3.02308e-08	AV node
Clstn2	7.0994e-07	6.50695	0.038	0.001	0.0220472	AV node
Hamp	3.48358e-23	6.49781	0.115	0.003	1.08182e-18	AV node
Myh3	8.53849e-11	6.4852	0.038	0.001	2.65163e-06	AV node
Rimklb	2.35865e-08	6.47992	0.038	0.001	0.00073248	AV node
Sln	1.44412e-74	6.47063	0.346	0.008	4.48473e-70	AV node
Rimbp2	8.29627e-44	6.45553	0.115	0.001	2.57641e-39	AV node
Myl7	2.25072e-23	6.45316	1	0.389	6.98961e-19	AV node
Ntsr1	2.08681e-09	6.44146	0.038	0.001	6.48059e-05	AV node
Cldn23	2.13337e-09	6.43254	0.038	0.001	6.62519e-05	AV node
Pcdh1	2.38154e-08	6.43012	0.038	0.001	0.000739588	AV node
Ryr3	6.31865e-28	6.41699	0.115	0.002	1.96226e-23	AV node
Slc24a4	1.91405e-29	6.40104	0.115	0.002	5.94409e-25	AV node
Pla2g7	1.5656e-07	6.39516	0.038	0.001	0.00486196	AV node
Ngfr	9.7346e-13	6.38122	0.038	0.001	3.02308e-08	AV node
Pmfbp1	9.7346e-13	6.37944	0.038	0.001	3.02308e-08	AV node
Unc80	4.82968e-70	6.37011	0.269	0.005	1.49986e-65	AV node
Tekt2	2.30325e-17	6.35931	0.077	0.002	7.15276e-13	AV node
Kcna5	2.10997e-09	6.35056	0.038	0.001	6.5525e-05	AV node
Defb19	3.09239e-16	6.33235	0.077	0.002	9.60342e-12	AV node
Gm47096	1.55221e-07	6.30302	0.038	0.001	0.00482039	AV node
Gnb3	1.06481e-13	6.29521	0.077	0.002	3.30678e-09	AV node
Sox5	9.72021e-39	6.27626	0.154	0.003	3.01861e-34	AV node
Luzp2	1.42634e-58	6.2676	0.269	0.006	4.42951e-54	AV node
Aldh1a1	1.2671e-18	6.24543	0.077	0.002	3.93499e-14	AV node
Edil3	1.14593e-15	6.24352	0.038	0	3.55868e-11	AV node
Shox2	4.53455e-114	6.22159	0.308	0.004	1.4082e-109	AV node
AA672651	2.35865e-08	6.19162	0.038	0.001	0.00073248	AV node
Car5a	2.40464e-08	6.17888	0.038	0.001	0.000746762	AV node
Hcn1	3.87345e-81	6.16982	0.385	0.009	1.2029e-76	AV node
Lef1	3.44915e-23	6.16489	0.115	0.003	1.07114e-18	AV node
Nexmif	2.09221e-29	6.15285	0.115	0.002	6.49735e-25	AV node
Tcf21	2.18095e-09	6.15032	0.038	0.001	6.77293e-05	AV node
Gm32834	1.5927e-07	6.14473	0.038	0.001	0.00494614	AV node
Gm32391	7.15448e-07	6.1256	0.038	0.001	0.0222182	AV node
Hrk	2.40464e-08	6.11899	0.038	0.001	0.000746762	AV node
Gucy2e	7.20997e-07	6.10372	0.038	0.001	0.0223906	AV node
Gm34059	8.76102e-11	6.08735	0.038	0.001	2.72074e-06	AV node
Tex26	2.68181e-15	6.07669	0.077	0.002	8.32836e-11	AV node
Gipc3	1.5927e-07	6.07291	0.038	0.001	0.00494614	AV node
Hkdc1	1.57909e-07	6.07094	0.038	0.001	0.00490388	AV node
Nrn1l	7.15448e-07	6.06666	0.038	0.001	0.0222182	AV node
Dock11	1.60643e-07	6.03953	0.038	0.001	0.00498876	AV node
Cav1	1.41566e-71	6.01748	0.269	0.005	4.39632e-67	AV node
Sema3d	7.4781e-28	5.93817	0.115	0.002	2.32232e-23	AV node
AC134548.2	7.20997e-07	5.89416	0.038	0.001	0.0223906	AV node
Gm31458	1.5927e-07	5.87299	0.038	0.001	0.00494614	AV node
Hs6st2	2.01356e-47	5.85511	0.269	0.008	6.25311e-43	AV node
Pla2r1	2.14265e-14	5.83639	0.077	0.002	6.654e-10	AV node
Myl2	2.67211e-15	-1.53488	1	1	8.29825e-11	AV node
Gm26903	2.83966e-15	5.82372	0.077	0.002	8.81855e-11	AV node
AC158972.2	7.61019e-07	5.81267	0.038	0.001	0.0236335	AV node
Tlr13	1.66247e-07	5.81056	0.038	0.001	0.00516281	AV node
Frmpd1	1.8426e-18	5.79822	0.115	0.004	5.72218e-14	AV node
Syndig1	3.36448e-13	5.78521	0.115	0.006	1.04484e-08	AV node
Efhc1	2.49925e-08	5.7399	0.038	0.001	0.000776143	AV node
Fibin	7.37895e-07	5.73294	0.038	0.001	0.0229153	AV node
Hoxb2	3.07498e-40	5.73026	0.154	0.003	9.54936e-36	AV node
Mpped2	1.03184e-13	-2.64369	0.385	0.977	3.20438e-09	AV node
Radil	5.44844e-30	5.72311	0.154	0.004	1.69201e-25	AV node
Slc43a3	2.12355e-14	5.71459	0.077	0.002	6.59469e-10	AV node
Inhba	2.71098e-21	5.71112	0.115	0.003	8.41894e-17	AV node
Dkkl1	7.37895e-07	5.70347	0.038	0.001	0.0229153	AV node
Hoxb3os	2.48816e-99	5.69098	0.385	0.007	7.72697e-95	AV node
Lpl	3.05287e-13	-1.38338	0.962	0.996	9.4807e-09	AV node
Mgp	3.16186e-13	-3.55583	0.5	0.946	9.81917e-09	AV node
Slitrk5	4.7813e-97	5.6572	0.462	0.011	1.48483e-92	AV node
Thsd7a	4.07503e-46	5.63055	0.308	0.01	1.2655e-41	AV node
Gm26531	7.55174e-07	5.62981	0.038	0.001	0.0234519	AV node
Kcnab1	1.7718e-08	5.62616	0.077	0.004	0.000550231	AV node
Pde1a	7.37895e-07	5.60245	0.038	0.001	0.0229153	AV node
Aqp1	4.59836e-23	5.5884	0.115	0.003	1.42802e-18	AV node
Pitx2	4.45325e-19	5.58697	0.115	0.004	1.38296e-14	AV node
Gm24474	9.55092e-09	5.57709	0.077	0.004	0.000296604	AV node
Tmem132c	1.40905e-35	5.56026	0.231	0.008	4.37581e-31	AV node
Col18a1	2.65979e-17	5.49519	0.115	0.004	8.25998e-13	AV node
Rgs10	9.50255e-78	5.4915	0.731	0.037	2.95102e-73	AV node
Rd3	1.45809e-59	5.46624	0.346	0.01	4.5281e-55	AV node
4930503L19Rik	8.07401e-18	5.44675	0.115	0.004	2.50739e-13	AV node
Nr2f1	2.54072e-17	5.41458	0.077	0.002	7.89021e-13	AV node
Gm15406	7.80504e-11	5.40282	0.077	0.003	2.42385e-06	AV node
Fstl4	4.45736e-30	5.37824	0.269	0.012	1.38423e-25	AV node
Atp1a3	7.61019e-07	5.35003	0.038	0.001	0.0236335	AV node
Slitrk6	2.12119e-10	5.34914	0.077	0.003	6.58737e-06	AV node
Gm11491	2.42362e-09	5.34054	0.077	0.004	7.52656e-05	AV node
Fabp5	2.0473e-08	5.33399	0.346	0.073	0.00063579	AV node
Igfbp4	2.76902e-76	5.31204	0.577	0.022	8.59918e-72	AV node
mt-Cytb	1.49659e-12	-0.85	1	1	4.64766e-08	AV node
Stard10	1.58336e-12	-2.05139	0.692	0.968	4.91711e-08	AV node
Dbi	2.25846e-12	-1.27513	0.962	1	7.01365e-08	AV node
Gria1	2.58228e-10	5.30742	0.115	0.007	8.01926e-06	AV node
Myl4	3.48335e-20	5.27938	1	0.539	1.08176e-15	AV node
Mrvi1	3.37237e-21	5.26688	0.115	0.003	1.04729e-16	AV node
Irx5	4.34497e-12	-2.80735	0.269	0.89	1.34933e-07	AV node
Sdk2	8.50109e-24	5.22219	0.154	0.005	2.64001e-19	AV node
Hs3st3a1	1.28257e-13	5.20217	0.077	0.002	3.98302e-09	AV node
Slc2a3	1.59405e-07	5.17148	0.077	0.005	0.00495032	AV node
Fcrls	1.14593e-15	5.17114	0.038	0	3.55868e-11	AV node
Map2	1.12805e-28	5.10424	0.192	0.007	3.50316e-24	AV node
Pak3	2.56327e-09	5.09981	0.077	0.004	7.96024e-05	AV node
Itm2b	1.98668e-11	-1.19955	1	0.999	6.16965e-07	AV node
Crip1	3.88333e-11	-2.38935	0.654	0.965	1.20597e-06	AV node
Emid1	7.75403e-18	5.09861	0.192	0.011	2.40801e-13	AV node
Efr3b	2.59786e-17	5.09158	0.154	0.007	8.06766e-13	AV node
Tpcn2	2.3979e-07	5.01196	0.077	0.005	0.00744668	AV node
Hs3st3b1	1.20379e-09	5.01128	0.077	0.004	3.73838e-05	AV node
Smpx	7.44011e-11	-1.425	0.769	0.992	2.31053e-06	AV node
Sparcl1	7.7538e-11	-3.21537	0.346	0.844	2.40794e-06	AV node
Shisa6	3.24441e-15	4.97886	0.077	0.002	1.00755e-10	AV node
Adamts8	4.27002e-21	4.9589	0.154	0.006	1.32606e-16	AV node
Pak1	3.38283e-08	4.95652	0.077	0.004	0.00105054	AV node
Mdk	3.37447e-38	4.95084	0.423	0.024	1.04794e-33	AV node
Gnmt	1.17968e-17	4.93478	0.192	0.011	3.6635e-13	AV node
Gm13594	5.70063e-17	4.92274	0.154	0.007	1.77033e-12	AV node
Mab21l2	8.161e-07	4.9124	0.077	0.005	0.025344	AV node
Pcdh9	5.65077e-07	4.90958	0.077	0.005	0.0175485	AV node
Nfasc	1.12804e-29	4.89189	0.269	0.013	3.50311e-25	AV node
Itgb8	2.66661e-43	4.80286	0.462	0.026	8.28116e-39	AV node
Tceal6	5.35354e-20	4.74313	0.231	0.014	1.66254e-15	AV node
Panx2	1.74538e-11	4.72814	0.192	0.018	5.42028e-07	AV node
Il1rap	1.22283e-10	4.72203	0.115	0.007	3.79749e-06	AV node
Tbx2	1.79842e-18	4.71591	0.231	0.015	5.58499e-14	AV node
Alox8	6.24652e-18	4.70948	0.154	0.007	1.93986e-13	AV node
Scn5a	1.0674e-10	-3.02994	0.192	0.808	3.31481e-06	AV node
Cited1	1.12256e-10	-2.1963	0.538	0.939	3.48611e-06	AV node
Rhbdl3	3.3543e-16	4.69372	0.077	0.002	1.04168e-11	AV node
Riiad1	1.42425e-24	4.68976	0.231	0.011	4.423e-20	AV node
Iigp1	1.27954e-18	4.68828	0.269	0.021	3.9736e-14	AV node
Gm10734	6.20286e-07	4.63715	0.077	0.005	0.019263	AV node
Thbs1	9.11323e-13	4.58245	0.192	0.016	2.83011e-08	AV node
Cend1	2.0882e-09	4.55635	0.115	0.008	6.4849e-05	AV node
mt-Nd4l	2.53895e-10	-0.844028	1	1	7.88471e-06	AV node
Cmtm3	3.8738e-24	4.54736	0.231	0.011	1.20301e-19	AV node
mt-Nd4	2.87756e-10	-0.722378	1	1	8.93625e-06	AV node
Mest	2.91e-10	-3.53401	0.192	0.805	9.037e-06	AV node
Tsc22d3	3.08455e-10	-1.73895	0.577	0.958	9.57908e-06	AV node
4933408B17Rik	1.16673e-07	4.52711	0.115	0.01	0.00362328	AV node
Cbln3	6.135e-13	4.5246	0.154	0.01	1.90522e-08	AV node
Gm15543	3.93274e-10	-3.16127	0.154	0.786	1.22131e-05	AV node
Tgif1	1.95192e-15	4.51249	0.192	0.013	6.06169e-11	AV node
Ezr	8.47277e-10	-1.4562	0.769	0.975	2.63122e-05	AV node
Etv1	8.73387e-10	-1.92155	0.423	0.923	2.7123e-05	AV node
Gja1	9.56204e-10	-2.87247	0.154	0.793	2.96949e-05	AV node
Zfhx4	2.40447e-13	4.49045	0.154	0.01	7.46708e-09	AV node
Nrn1	4.93368e-17	4.48605	0.192	0.012	1.53216e-12	AV node
Mybphl	8.23647e-20	4.46378	0.308	0.025	2.55783e-15	AV node
Aff3	9.43883e-13	4.45791	0.154	0.01	2.93123e-08	AV node
Casp8	4.38135e-07	4.44392	0.077	0.005	0.0136063	AV node
Elovl6	2.9554e-07	4.4367	0.154	0.019	0.00917798	AV node
Gpr162	1.61258e-13	4.42545	0.192	0.015	5.00785e-09	AV node
Gjd3	1.39534e-10	4.41279	0.154	0.012	4.33322e-06	AV node
Gsg1	1.66497e-24	4.41112	0.346	0.026	5.17057e-20	AV node
Dennd2a	2.28134e-12	4.37325	0.154	0.01	7.0847e-08	AV node
Boc	9.2156e-17	4.33197	0.269	0.023	2.8619e-12	AV node
Col3a1	2.80087e-07	4.3072	0.115	0.011	0.00869812	AV node
Adam33	7.54982e-08	4.30668	0.115	0.01	0.0023446	AV node
Rec114	1.1208e-07	4.27099	0.192	0.027	0.00348064	AV node
Cobl	8.63207e-13	4.15921	0.269	0.03	2.68069e-08	AV node
Epdr1	1.3436e-08	4.15789	0.154	0.015	0.000417255	AV node
Ech1	2.40678e-09	-1.11009	0.923	0.998	7.47424e-05	AV node
Rab33a	6.40535e-08	4.14772	0.115	0.01	0.00198918	AV node
mt-Co2	2.4392e-09	-0.668825	1	1	7.57493e-05	AV node
Gm44777	6.78538e-08	4.13708	0.115	0.01	0.0021072	AV node
Pcdh7	2.9006e-09	-1.92479	0.423	0.892	9.0078e-05	AV node
Rad51ap2	3.39181e-12	4.11566	0.154	0.011	1.05333e-07	AV node
Gja5	4.27101e-09	-3.32497	0.115	0.714	0.000132636	AV node
Fam181b	1.93442e-09	4.11276	0.115	0.008	6.00734e-05	AV node
Plcl1	3.89259e-17	4.11239	0.231	0.016	1.20884e-12	AV node
Tdrp	1.35767e-09	4.11171	0.154	0.014	4.21625e-05	AV node
Irx2	7.39274e-09	-2.73189	0.192	0.769	0.000229582	AV node
Nid2	1.2519e-14	4.0201	0.269	0.026	3.88776e-10	AV node
Frmd4b	3.90015e-13	3.99335	0.231	0.022	1.21119e-08	AV node
Sdc4	8.74158e-09	-1.78163	0.577	0.91	0.00027147	AV node
Pln	8.74397e-09	-0.813346	1	1	0.000271544	AV node
Spon1	5.0534e-28	3.97874	0.538	0.054	1.56933e-23	AV node
Tmeff1	4.44544e-11	3.95115	0.231	0.025	1.38053e-06	AV node
mt-Nd5	1.1523e-08	-0.868737	1	1	0.000357846	AV node
Bmp2	2.43296e-19	3.86622	0.769	0.171	7.55554e-15	AV node
Tmtc2	1.00898e-06	3.78526	0.115	0.011	0.0313337	AV node
Slc39a8	3.27899e-21	3.72307	0.538	0.072	1.01829e-16	AV node
Tmc7	2.40013e-07	3.65903	0.154	0.018	0.0074536	AV node
Gata6	1.12732e-30	3.62774	1	0.209	3.50089e-26	AV node
Tbx20	1.552e-27	3.61897	0.692	0.096	4.81973e-23	AV node
Rnase4	1.39057e-07	3.59664	0.231	0.038	0.00431843	AV node
Scn1b	6.44028e-09	3.59301	0.231	0.032	0.000200003	AV node
Casq1	1.9549e-22	3.58705	0.692	0.114	6.07094e-18	AV node
Plppr5	6.78772e-19	3.58508	0.423	0.048	2.10793e-14	AV node
Prss23	5.08434e-13	3.5772	0.346	0.047	1.57894e-08	AV node
Il13ra1	4.28997e-13	3.48372	0.308	0.038	1.33225e-08	AV node
Ddit4l	7.97259e-09	3.45795	0.192	0.023	0.000247589	AV node
Gm5532	3.11559e-08	3.4231	0.192	0.024	0.000967548	AV node
Arhgap6	9.12408e-07	3.36878	0.231	0.042	0.0283348	AV node
Eno1b	1.40765e-07	3.34948	0.192	0.026	0.00437144	AV node
Limch1	2.60957e-08	-3.38084	0.077	0.668	0.000810402	AV node
mt-Co3	2.84595e-08	-0.554783	1	1	0.00088381	AV node
Plxdc2	2.20667e-08	3.34131	0.385	0.089	0.000685282	AV node
Palmd	3.52187e-10	3.33509	0.308	0.047	1.09372e-05	AV node
Mef2c	4.58765e-19	3.32183	0.769	0.179	1.42469e-14	AV node
Tesc	3.8668e-08	-1.48815	0.692	0.954	0.00120083	AV node
mt-Co1	4.74778e-08	-0.569371	1	1	0.00147442	AV node
Kank3	1.09856e-09	3.22764	0.308	0.051	3.41159e-05	AV node
Nes	5.80266e-12	3.18139	0.385	0.062	1.80202e-07	AV node
Aspscr1	1.7446e-17	3.12619	0.962	0.489	5.41785e-13	AV node
Sphkap	1.45885e-10	3.11922	0.423	0.086	4.53045e-06	AV node
Bex4	3.21369e-21	3.04422	0.692	0.119	9.98012e-17	AV node
Tbx3	7.0717e-19	2.96307	0.692	0.125	2.19612e-14	AV node
Syt11	1.2509e-07	2.95365	0.269	0.049	0.00388467	AV node
Vcan	7.05573e-08	-1.57436	0.346	0.885	0.00219116	AV node
Tox3	2.6169e-12	2.90646	0.731	0.238	8.12679e-08	AV node
Gsdme	6.63781e-09	2.9057	0.269	0.041	0.000206137	AV node
mt-Atp6	9.59067e-08	-0.545988	1	1	0.00297838	AV node
Fth1	9.7174e-08	-0.484847	1	1	0.00301774	AV node
Znrf1	2.15886e-08	2.80528	0.5	0.148	0.000670433	AV node
Slc2a1	9.05734e-09	2.80173	0.5	0.137	0.000281276	AV node
Tgfb2	6.3483e-17	2.80157	0.885	0.3	1.97147e-12	AV node
Lgals1	1.22601e-07	-1.26314	0.731	0.959	0.00380738	AV node
Csdc2	8.21163e-07	2.75508	0.269	0.054	0.0255012	AV node
Cdc14b	1.36022e-07	2.74937	0.346	0.077	0.00422415	AV node
Coq8a	1.39038e-07	-1.50983	0.385	0.855	0.00431782	AV node
Ankrd1	3.99971e-15	2.68525	1	0.527	1.24211e-10	AV node
Cacna1d	5.24138e-08	2.66742	0.462	0.128	0.00162771	AV node
Gm34030	9.67767e-14	2.6193	0.885	0.391	3.0054e-09	AV node
Slc22a1	4.50632e-11	2.52109	0.962	0.586	1.39944e-06	AV node
Asap2	6.71097e-09	2.48485	0.5	0.13	0.000208409	AV node
5033428I22Rik	8.25387e-09	2.48237	0.423	0.095	0.000256324	AV node
F3	2.45831e-07	2.48212	0.423	0.116	0.00763427	AV node
Gnao1	1.5787e-09	2.37771	0.615	0.199	4.90266e-05	AV node
Col12a1	3.24428e-07	2.37318	0.423	0.121	0.0100751	AV node
Rbms3	5.48044e-07	2.37186	0.423	0.117	0.0170195	AV node
Sfrp5	4.34908e-11	2.30572	0.423	0.078	1.35061e-06	AV node
Cnn1	2.16195e-08	2.29274	0.462	0.116	0.000671395	AV node
Epb41l2	1.05402e-06	2.2781	0.5	0.167	0.0327325	AV node
Tuba1a	3.65809e-13	2.26392	0.962	0.487	1.13602e-08	AV node
Tmem123	3.13214e-07	2.21318	0.423	0.112	0.00972687	AV node
Rgs12	4.14175e-09	2.19173	0.654	0.248	0.000128622	AV node
Gde1	5.50464e-12	2.05699	0.962	0.595	1.70947e-07	AV node
Fhl2	1.21193e-12	2.04587	1	0.615	3.76366e-08	AV node
Bves	1.49369e-06	1.9326	0.654	0.301	0.0463866	AV node
Afdn	9.95765e-08	1.89206	0.808	0.48	0.00309235	AV node
Myl9	9.55845e-12	1.85842	1	0.89	2.96838e-07	AV node
Csrp2	7.02605e-08	1.84892	0.923	0.705	0.00218194	AV node
Zyx	7.33432e-08	1.8061	0.731	0.31	0.00227767	AV node
Bik	5.16317e-08	1.791	0.846	0.47	0.00160342	AV node
Adk	1.20779e-06	1.76208	0.808	0.573	0.0375078	AV node
Mif	4.38794e-11	1.75544	0.962	0.834	1.36268e-06	AV node
Macrod1	4.90527e-07	-2.06721	0.269	0.727	0.0152333	AV node
Arid5b	2.00749e-08	1.71875	0.885	0.595	0.000623425	AV node
Jpt1	1.37972e-09	1.67113	0.885	0.533	4.28474e-05	AV node
Acta2	7.22204e-07	1.64502	0.692	0.315	0.022428	AV node
Scn10a	5.89022e-07	-3.44692	0.077	0.59	0.0182921	AV node
Lpgat1	6.03594e-07	-1.56439	0.577	0.879	0.0187446	AV node
Sorbs2	8.97802e-07	1.63392	0.885	0.809	0.0278812	AV node
Sulf2	6.41676e-07	-1.4906	0.538	0.864	0.0199272	AV node
Idh2	6.47492e-07	-0.562319	1	1	0.0201079	AV node
Snhg18	4.92159e-07	1.63345	0.692	0.297	0.015284	AV node
Dhrs7	1.64717e-08	1.61627	0.846	0.564	0.000511529	AV node
Popdc2	6.76849e-08	1.6047	0.923	0.721	0.00210196	AV node
Myl6	7.41351e-12	1.54265	1	0.92	2.30227e-07	AV node
Adssl1	7.1983e-07	-1.53341	0.423	0.859	0.0223543	AV node
Ptpn11	1.04923e-06	1.45889	0.885	0.552	0.0325838	AV node
Aplp2	6.93501e-07	1.42479	0.885	0.543	0.0215367	AV node
Enah	1.5659e-06	1.3642	0.885	0.665	0.0486289	AV node
Perp	2.32344e-10	1.34252	1	0.869	7.21545e-06	AV node
Dstn	1.23309e-13	1.3241	1	0.989	3.82935e-09	AV node
Clic1	3.53504e-08	1.29598	1	0.839	0.00109781	AV node
Atp5h	7.45263e-07	-0.388406	1	1	0.0231441	AV node
Pgam2	1.47496e-11	1.20738	1	0.988	4.58049e-07	AV node
Serpinb6a	2.75295e-07	1.17193	0.962	0.579	0.00854928	AV node
Svil	4.68005e-07	1.09002	0.923	0.704	0.0145339	AV node
Got1	1.20701e-08	1.07971	0.962	0.924	0.000374837	AV node
Tnnc1	4.02327e-10	1.02205	1	0.984	1.24943e-05	AV node
Rbpms	3.71324e-10	0.987028	1	0.986	1.15315e-05	AV node
Tnni1	1.80216e-10	0.949275	1	0.998	5.59662e-06	AV node
Olfm1	9.71308e-07	-3.45735	0.038	0.555	0.030164	AV node
Slc16a12	1.00471e-06	-2.27556	0.231	0.673	0.0312012	AV node
Pgam1	1.8317e-08	0.943952	1	0.895	0.000568835	AV node
Tnnt2	1.09706e-12	0.886812	1	1	3.40692e-08	AV node
Tcap	5.59087e-08	0.759309	1	0.998	0.00173625	AV node
Rpl8	1.73736e-07	0.503201	1	1	0.00539537	AV node
Smyd2	1.44604e-06	-2.30844	0.192	0.646	0.0449067	AV node
Ndufa11	2.04431e-07	0.42646	1	1	0.0063486	AV node
Adprhl1	1.53476e-06	-0.783701	0.962	0.996	0.0476619	AV node
Irx3	1.54019e-06	-1.88592	0.308	0.748	0.0478307	AV node
Rps3a1	4.33489e-07	0.425805	1	1	0.013462	AV node
Bambi	1.72186e-06	1.88175	0.885	0.583	0.0534722	AV node
Flnc	1.78849e-06	1.24138	0.846	0.562	0.0555416	AV node
Prdx6	1.80935e-06	0.905136	1	0.842	0.0561894	AV node
Rcn3	1.8485e-06	2.31497	0.385	0.105	0.057405	AV node
Corin	1.88134e-06	-2.70486	0.115	0.609	0.058425	AV node
St3gal5	1.93193e-06	2.92883	0.231	0.042	0.059996	AV node
Nr2f2	2.03302e-06	3.96883	0.077	0.006	0.0631356	AV node
Mgmt	2.05902e-06	-2.36436	0.192	0.66	0.0639427	AV node
Prnp	2.20342e-06	1.98807	0.731	0.434	0.0684272	AV node
Tro	2.24074e-06	2.91545	0.192	0.031	0.0695861	AV node
Prkcd	2.40862e-06	3.97699	0.115	0.012	0.0747996	AV node
Gm26852	2.47345e-06	6.07438	0.038	0.001	0.0768129	AV node
Syt17	2.49089e-06	5.90621	0.038	0.001	0.0773545	AV node
Layn	2.49089e-06	5.84175	0.038	0.001	0.0773545	AV node
Kcnh6	2.50844e-06	5.95038	0.038	0.001	0.0778997	AV node
Gm26710	2.50844e-06	5.92283	0.038	0.001	0.0778997	AV node
Fam196b	2.54392e-06	6.00361	0.038	0.001	0.0790014	AV node
H3f3b	2.5674e-06	0.6111	1	0.997	0.0797306	AV node
Eya1	2.57987e-06	5.23876	0.038	0.001	0.0801179	AV node
Rs1	2.61631e-06	5.69024	0.038	0.001	0.0812496	AV node
Gm38948	2.61631e-06	5.6786	0.038	0.001	0.0812496	AV node
Ly6k	2.63472e-06	5.63962	0.038	0.001	0.0818212	AV node
Dgkb	2.63472e-06	5.38242	0.038	0.001	0.0818212	AV node
Rnf144a	2.65325e-06	5.4821	0.038	0.001	0.0823967	AV node
Cabyr	2.65325e-06	5.39696	0.038	0.001	0.0823967	AV node
Fam13c	2.93686e-06	4.07696	0.115	0.012	0.0912043	AV node
Slit2	3.16717e-06	-2.00922	0.231	0.704	0.0983565	AV node
Lnx1	3.19526e-06	3.40722	0.115	0.012	0.0992289	AV node
Srgap1	3.40735e-06	-2.23706	0.154	0.638	0.105815	AV node
Tnfsf9	3.64894e-06	4.14807	0.077	0.006	0.113318	AV node
Nudt4	3.71238e-06	-1.36439	0.385	0.845	0.115288	AV node
Uchl1	4.00564e-06	-1.58908	0.538	0.814	0.124395	AV node
mt-Nd2	4.01289e-06	-0.49062	1	1	0.12462	AV node
Ppic	4.01985e-06	1.62031	0.808	0.502	0.124837	AV node
Mylk3	4.12322e-06	-0.904944	0.846	0.959	0.128046	AV node
Hspb8	4.2167e-06	2.34458	0.577	0.246	0.13095	AV node
Gpx3	4.28036e-06	1.11858	0.962	0.706	0.132927	AV node
Atp2a2	4.60834e-06	0.644189	1	0.998	0.143112	AV node
Dzip1	4.70929e-06	4.36034	0.077	0.006	0.146247	AV node
Ctdspl	4.76574e-06	1.9804	0.5	0.183	0.148	AV node
Tnfrsf12a	4.79914e-06	1.47163	0.808	0.586	0.149037	AV node
Mcmdc2	4.825e-06	4.66462	0.077	0.006	0.14984	AV node
2023-03-03	4.99877e-06	3.32124	0.154	0.022	0.155237	AV node
Myh8	5.0145e-06	3.62465	0.115	0.013	0.155725	AV node
Gng11	5.29863e-06	1.82591	0.577	0.25	0.164549	AV node
Arhgap31	5.47686e-06	1.26709	0.808	0.465	0.170084	AV node
Phldb2	5.57961e-06	2.27327	0.423	0.135	0.173275	AV node
Smad6	5.86441e-06	2.205	0.385	0.115	0.182119	AV node
Samd5	5.96346e-06	3.06816	0.192	0.033	0.185195	AV node
Fam189a2	6.32452e-06	1.51954	0.846	0.55	0.196408	AV node
Rps8	6.76338e-06	0.46097	1	1	0.210037	AV node
Fgf1	6.80371e-06	-2.15118	0.192	0.641	0.211289	AV node
Sparc	6.98641e-06	-0.697494	1	0.997	0.216963	AV node
5930430L01Rik	6.99534e-06	2.32613	0.308	0.076	0.21724	AV node
Hes1	7.01278e-06	-1.88213	0.308	0.734	0.217782	AV node
Ccdc162	7.02389e-06	6.14307	0.038	0.002	0.218127	AV node
Scmh1	7.04266e-06	1.59569	0.654	0.317	0.21871	AV node
Sema3a	7.05234e-06	-2.47242	0.115	0.575	0.219011	AV node
Wdr49	7.06927e-06	6.20058	0.038	0.002	0.219536	AV node
2700046A07Rik	7.06927e-06	6.06367	0.038	0.002	0.219536	AV node
Gata5os	7.11494e-06	5.98751	0.038	0.002	0.220954	AV node
Ggt5	7.11494e-06	5.74994	0.038	0.002	0.220954	AV node
Gm30551	7.16089e-06	5.58131	0.038	0.002	0.222381	AV node
Qprt	7.2147e-06	3.49419	0.115	0.013	0.224052	AV node
Fgf22	7.25363e-06	5.78186	0.038	0.002	0.225262	AV node
Greb1l	7.49055e-06	5.25392	0.038	0.002	0.232619	AV node
Chchd10	7.75055e-06	0.416837	1	1	0.240693	AV node
Cisd1	7.79092e-06	0.578737	0.962	0.976	0.241947	AV node
Pfkfb4	7.83598e-06	3.2263	0.154	0.023	0.243346	AV node
Tpi1	7.88665e-06	0.505258	1	0.996	0.24492	AV node
Nsg2	7.93062e-06	-2.97807	0.077	0.539	0.246285	AV node
Filip1	8.01075e-06	1.15896	0.923	0.693	0.248774	AV node
Ttc39a	8.08008e-06	4.52881	0.077	0.006	0.250927	AV node
Gm17029	8.23619e-06	3.40898	0.154	0.023	0.255775	AV node
Lamb3	8.35711e-06	-2.24966	0.192	0.658	0.25953	AV node
Efcab2	8.57015e-06	1.43346	0.692	0.319	0.266146	AV node
Ciart	8.69593e-06	3.56126	0.154	0.023	0.270052	AV node
Ckb	8.70465e-06	-1.08237	0.731	0.939	0.270323	AV node
Rad18	8.99886e-06	3.65737	0.115	0.013	0.279459	AV node
Dok7	9.08905e-06	3.04102	0.192	0.034	0.28226	AV node
Fam104a	9.16967e-06	0.869172	0.885	0.809	0.284764	AV node
Rrad	9.23456e-06	0.665868	1	0.976	0.286779	AV node
Fam174b	1.04412e-05	-1.54312	0.346	0.769	0.324252	AV node
Atp1b1	1.22985e-05	0.73991	0.962	0.996	0.38193	AV node
Scd4	1.2447e-05	2.70649	0.192	0.034	0.386541	AV node
AC130815.2	1.30315e-05	3.37318	0.154	0.024	0.404692	AV node
Clu	1.30611e-05	1.62129	0.846	0.553	0.405611	AV node
Eef1g	1.30929e-05	0.777191	1	0.934	0.406599	AV node
Slco3a1	1.31323e-05	-1.30956	0.577	0.837	0.407824	AV node
Lrrc10	1.31619e-05	-1.33709	0.615	0.875	0.408744	AV node
Homer1	1.32808e-05	-2.63147	0.077	0.525	0.412434	AV node
6330403K07Rik	1.46696e-05	1.59193	0.577	0.232	0.455566	AV node
Aldoa	1.51527e-05	0.777499	1	0.996	0.470567	AV node
Rtn4	1.60339e-05	0.732997	1	0.966	0.497932	AV node
Zfand4	1.62201e-05	3.85627	0.077	0.007	0.503716	AV node
Crip2	1.63897e-05	-0.417229	1	1	0.508982	AV node
Doc2g	1.65022e-05	-2.03843	0.192	0.611	0.512476	AV node
Bfsp1	1.66916e-05	4.67119	0.077	0.007	0.518358	AV node
Tceal9	1.68047e-05	0.964717	0.923	0.793	0.521871	AV node
Tbx3os1	1.69002e-05	4.41545	0.077	0.007	0.524835	AV node
Gm29642	1.70379e-05	5.72024	0.038	0.002	0.529111	AV node
4930572G02Rik	1.71395e-05	6.06978	0.038	0.002	0.532266	AV node
Myb	1.71395e-05	5.87115	0.038	0.002	0.532266	AV node
1700086D15Rik	1.71395e-05	5.83611	0.038	0.002	0.532266	AV node
Epha1	1.71395e-05	5.78141	0.038	0.002	0.532266	AV node
Nrxn3	1.72416e-05	5.69216	0.038	0.002	0.535439	AV node
Dnmt3aos	1.72416e-05	5.59284	0.038	0.002	0.535439	AV node
Mstn	1.74866e-05	4.34326	0.077	0.007	0.543046	AV node
Mdp1	1.75753e-05	-0.862543	0.885	0.948	0.545801	AV node
Trim34a	1.76561e-05	5.52861	0.038	0.002	0.548312	AV node
Cacna2d3	1.76892e-05	3.68629	0.115	0.014	0.549337	AV node
Msx2	1.8753e-05	4.17869	0.115	0.015	0.582376	AV node
Tbc1d1	1.89879e-05	1.9925	0.538	0.235	0.58967	AV node
Npb	1.91119e-05	3.35544	0.192	0.036	0.593519	AV node
Sbk2	1.91127e-05	-2.49757	0.192	0.582	0.593544	AV node
Abl2	1.92988e-05	2.13778	0.346	0.099	0.599325	AV node
Mb	2.09328e-05	-1.24807	0.692	0.938	0.650069	AV node
Rack1	2.15714e-05	0.591784	1	0.991	0.6699	AV node
4930455G09Rik	2.16446e-05	3.16292	0.154	0.024	0.672172	AV node
Rab20	2.17159e-05	1.0535	0.885	0.622	0.674386	AV node
Cd9	2.23854e-05	-2.99782	0.038	0.484	0.695179	AV node
Pcgf5	2.24822e-05	1.91445	0.654	0.397	0.698185	AV node
Nexn	2.37694e-05	0.468056	1	0.995	0.73816	AV node
Cox4i2	2.37773e-05	3.6623	0.154	0.025	0.738404	AV node
Hadh	2.44168e-05	-0.786533	0.885	0.971	0.758265	AV node
Pcdhga8	2.49802e-05	3.90571	0.077	0.007	0.775761	AV node
Plekha7	2.69359e-05	-2.16247	0.154	0.585	0.836496	AV node
Cox7a2l	2.70607e-05	0.470368	1	0.994	0.840371	AV node
Chchd7	2.72606e-05	0.814295	1	0.862	0.846577	AV node
Limd1	2.83102e-05	1.60745	0.654	0.341	0.879174	AV node
Pdlim3	2.94525e-05	1.35498	0.769	0.554	0.914646	AV node
Ndufa7	3.04691e-05	-0.403156	1	1	0.946218	AV node
Sdc2	3.22089e-05	2.04096	0.5	0.211	1	AV node
Fst	3.28559e-05	3.60456	0.077	0.007	1	AV node
Sema3c	3.3153e-05	-1.68708	0.308	0.712	1	AV node
Wisp1	3.5589e-05	-1.5235	0.423	0.758	1	AV node
Phf13	3.57138e-05	1.77145	0.462	0.175	1	AV node
Pcdh18	3.57195e-05	2.69622	0.231	0.054	1	AV node
Mtmr7	3.60273e-05	3.22187	0.154	0.026	1	AV node
Izumo1	3.65074e-05	5.83629	0.038	0.002	1	AV node
Olfr873	3.67095e-05	5.64206	0.038	0.002	1	AV node
Fbln2	3.71169e-05	5.58738	0.038	0.002	1	AV node
Suds3	3.71827e-05	-1.60698	0.269	0.668	1	AV node
Gm6410	3.7736e-05	5.4135	0.038	0.002	1	AV node
B3galnt1	3.80084e-05	3.47548	0.115	0.015	1	AV node
Gm26576	3.8365e-05	5.53906	0.038	0.002	1	AV node
Lcat	4.02406e-05	3.72336	0.077	0.007	1	AV node
Mgst3	4.0397e-05	-0.62646	0.923	0.997	1	AV node
Vegfb	4.27141e-05	0.887616	0.962	0.879	1	AV node
Cacna2d2	4.42189e-05	0.871544	0.923	0.685	1	AV node
Sh3gl3	4.53479e-05	2.2174	0.462	0.2	1	AV node
Igfbp5	4.55369e-05	1.17709	1	0.877	1	AV node
Gamt	4.76895e-05	-2.8594	0.077	0.469	1	AV node
Pmepa1	4.76962e-05	-0.983375	0.769	0.947	1	AV node
Nrp1	4.89279e-05	1.80357	0.577	0.28	1	AV node
Med13	4.90261e-05	1.13276	0.731	0.383	1	AV node
Itgb5	4.97106e-05	-1.60849	0.308	0.701	1	AV node
Ankrd45	5.09006e-05	3.72539	0.115	0.016	1	AV node
Col4a6	5.17715e-05	2.21387	0.308	0.089	1	AV node
Ybx1	5.2773e-05	-0.445815	1	1	1	AV node
Irx1	5.40614e-05	-2.1479	0.154	0.562	1	AV node
Hmgn3	5.48121e-05	1.04653	0.846	0.646	1	AV node
Marcks	5.53908e-05	1.86823	0.423	0.162	1	AV node
Slc22a3	6.19734e-05	3.92258	0.115	0.016	1	AV node
Myoz2	6.22344e-05	0.597457	1	0.97	1	AV node
Lifr	6.25063e-05	-3.03297	0.038	0.433	1	AV node
Ptn	6.28073e-05	2.16484	0.346	0.111	1	AV node
G0s2	6.30735e-05	-1.72228	0.462	0.736	1	AV node
Gm11716	6.41543e-05	-1.67869	0.231	0.643	1	AV node
Gng5	6.61079e-05	0.3616	1	1	1	AV node
Mlip	6.63512e-05	1.48246	0.769	0.533	1	AV node
Hes7	6.68039e-05	3.8816	0.077	0.008	1	AV node
Hrasls	6.71268e-05	3.17381	0.154	0.027	1	AV node
Sertad1	6.74095e-05	1.05365	0.923	0.641	1	AV node
Arl5a	6.79269e-05	-1.18603	0.308	0.752	1	AV node
Pebp1	6.79583e-05	-0.516997	1	0.999	1	AV node
Pmm1	6.85304e-05	1.56802	0.5	0.202	1	AV node
Scp2	7.03235e-05	-0.78724	0.808	0.954	1	AV node
Rpsa	7.04578e-05	0.450133	1	0.999	1	AV node
Abcc4	7.15562e-05	5.69487	0.038	0.002	1	AV node
F2	7.15562e-05	5.57428	0.038	0.002	1	AV node
Sspnos	7.19256e-05	5.46017	0.038	0.002	1	AV node
Smpd3	7.22968e-05	5.25691	0.038	0.002	1	AV node
Camk1d	7.26699e-05	5.33716	0.038	0.002	1	AV node
Gm43653	7.34214e-05	5.29152	0.038	0.002	1	AV node
Gm26812	7.37999e-05	5.19514	0.038	0.002	1	AV node
Rbpms2	7.39105e-05	1.10394	0.769	0.495	1	AV node
Gm15510	7.45625e-05	5.17581	0.038	0.002	1	AV node
Gm15934	7.68625e-05	2.72378	0.192	0.041	1	AV node
Nudt3	7.79594e-05	-0.983083	0.615	0.897	1	AV node
Hlf	8.32523e-05	-1.63962	0.269	0.664	1	AV node
Trim62	9.11834e-05	4.16693	0.077	0.008	1	AV node
Chpt1	9.1359e-05	0.906253	0.885	0.797	1	AV node
Gm15867	9.42645e-05	3.42727	0.154	0.029	1	AV node
Mrps21	9.55477e-05	-0.549114	0.923	0.979	1	AV node
Gabrb3	0.000100351	3.70049	0.115	0.017	1	AV node
Abcc9	0.000102354	-1.81614	0.154	0.58	1	AV node
Tgfb1i1	0.000102765	1.62166	0.577	0.3	1	AV node
Sipa1l1	0.000103008	1.70645	0.385	0.13	1	AV node
Rpl12	0.000103685	0.491963	1	0.996	1	AV node
Rps24	0.000104386	0.266337	1	1	1	AV node
mt-Nd3	0.000105091	-0.698011	0.962	0.991	1	AV node
Pde3a	0.000106885	2.80096	0.231	0.058	1	AV node
Fmod	0.000117905	4.65031	0.077	0.008	1	AV node
Adamtsl1	0.000118487	3.4246	0.192	0.043	1	AV node
Selenom	0.000121873	0.726168	1	0.932	1	AV node
Dnajc3	0.000125518	1.26443	0.769	0.579	1	AV node
Fam180a	0.000127326	5.51123	0.038	0.002	1	AV node
Bmp4	0.000127326	5.4568	0.038	0.002	1	AV node
Msh4	0.000128562	5.5118	0.038	0.002	1	AV node
Taf9	0.000128562	5.3624	0.038	0.002	1	AV node
Reep5	0.000129429	1.10389	0.923	0.825	1	AV node
Traf3ip3	0.000131066	5.14733	0.038	0.002	1	AV node
Tssk6	0.0001317	5.23047	0.038	0.002	1	AV node
Dusp9	0.0001317	5.21969	0.038	0.002	1	AV node
Aspn	0.000132336	5.02867	0.038	0.002	1	AV node
Ndnf	0.000132686	2.59467	0.269	0.078	1	AV node
Gm49083	0.000134927	1.93081	0.346	0.116	1	AV node
Itga1	0.000135067	3.14476	0.154	0.029	1	AV node
Slc6a6	0.000135257	-1.70206	0.346	0.671	1	AV node
Plekho2	0.000141576	3.49204	0.115	0.017	1	AV node
Unc13c	0.000153873	2.18032	0.231	0.057	1	AV node
Ier3	0.000154449	0.967519	0.885	0.771	1	AV node
Zfpm1	0.000157701	1.64744	0.5	0.218	1	AV node
Ephb1	0.000160262	-3.35762	0	0.371	1	AV node
Gata5	0.000161026	3.82703	0.115	0.018	1	AV node
Gpi1	0.000163621	0.606238	1	0.978	1	AV node
Cox20	0.000171238	0.581675	1	0.948	1	AV node
Ptp4a2	0.000173803	-0.632988	0.923	0.98	1	AV node
Nrk	0.000174699	4.02979	0.077	0.008	1	AV node
Ccl2	0.000175559	4.37525	0.077	0.008	1	AV node
Eef1akmt1	0.000180778	-1.51935	0.269	0.628	1	AV node
Rps19	0.000181908	0.401382	1	0.998	1	AV node
Inha	0.000182666	2.49496	0.308	0.096	1	AV node
Eif1	0.000186197	0.267486	1	1	1	AV node
Slc6a17	0.000187623	2.19775	0.269	0.077	1	AV node
Csrp3	0.000189084	-0.601723	1	1	1	AV node
Srsf2	0.00019027	0.875355	0.923	0.785	1	AV node
Hopx	0.000193492	-0.939113	0.885	0.988	1	AV node
Traf5	0.00019634	2.60715	0.192	0.044	1	AV node
Gm20324	0.000198752	4.06352	0.077	0.009	1	AV node
Vcl	0.00019985	1.63132	0.462	0.204	1	AV node
Farp1	0.000201467	2.2942	0.269	0.081	1	AV node
Afap1l1	0.00020556	-1.22998	0.308	0.705	1	AV node
Man1a2	0.000208431	-1.37082	0.308	0.692	1	AV node
Hist1h2bc	0.000212939	-1.07249	0.615	0.84	1	AV node
Igsf9	0.000214004	5.38482	0.038	0.002	1	AV node
Hnrnpf	0.000214552	0.733631	0.885	0.871	1	AV node
Sorcs2	0.000214936	-1.71056	0.231	0.586	1	AV node
Gpr85	0.00021862	3.24301	0.154	0.03	1	AV node
Srpx2	0.000221917	5.20631	0.038	0.002	1	AV node
Kcnip4	0.000223937	4.94695	0.038	0.002	1	AV node
Gm28731	0.000227001	4.92999	0.038	0.002	1	AV node
Gm15063	0.000227001	4.85992	0.038	0.002	1	AV node
Dazl	0.000227001	4.78022	0.038	0.002	1	AV node
Xirp2	0.000229193	-1.42135	0.423	0.764	1	AV node
Itm2a	0.000231872	-1.95808	0.154	0.529	1	AV node
Map1lc3b	0.00023823	-0.449856	1	0.997	1	AV node
Gls	0.00024416	-1.3669	0.269	0.649	1	AV node
Pink1	0.000248095	-0.800733	0.692	0.906	1	AV node
Art1	0.000248407	-2.48223	0.115	0.462	1	AV node
Mark1	0.000248543	2.50408	0.231	0.062	1	AV node
Ica1	0.000249841	2.25334	0.269	0.078	1	AV node
Rassf1	0.000260075	1.52258	0.692	0.441	1	AV node
Fut8	0.000273234	-2.09842	0.154	0.488	1	AV node
Rab3a	0.000273919	-1.17908	0.385	0.733	1	AV node
Lamb2	0.000277474	-1.09217	0.5	0.802	1	AV node
Mxra7	0.000281458	3.11527	0.154	0.031	1	AV node
Cacna1g	0.000284732	1.27873	0.654	0.427	1	AV node
Wwp1	0.000286322	-1.73997	0.231	0.556	1	AV node
Txnip	0.000287119	-0.925101	0.808	0.948	1	AV node
Timp3	0.000293212	0.81669	0.846	0.76	1	AV node
Tubb4a	0.000293748	3.77985	0.077	0.009	1	AV node
1500009L16Rik	0.000298491	1.1995	0.731	0.451	1	AV node
Acp6	0.000300848	-2.55549	0.115	0.441	1	AV node
Cab39l	0.000304566	-1.97655	0.115	0.498	1	AV node
Prcd	0.000305251	3.4503	0.115	0.019	1	AV node
Prrx2	0.000307583	-1.80143	0.269	0.581	1	AV node
Pim1	0.000307723	1.00575	0.769	0.592	1	AV node
Cxcl12	0.000308145	-3.65038	0	0.347	1	AV node
Fundc2	0.0003214	-0.631072	0.885	0.967	1	AV node
Ckmt2	0.000323131	-2.17226	0.154	0.513	1	AV node
Cryab	0.000324313	0.397849	1	1	1	AV node
[truncated: 18,724 more rows]
